# Supplementary material
Source: PubMed Central journal article supplement (PMC3968794)
Supplement: NIHMS523117-supplement-01.pdf [file NIHMS523117-supplement-01.pdf]

## Supplementary Data

Synthesis of structurally diverse benzosuberene analogues and their biological evaluation as anti-cancer agents

Rajendra P. Tanpure<sup>a</sup>, Clinton S. George<sup>a</sup>, Tracy E. Strecker<sup>a</sup>, Laxman Devkota<sup>a</sup>, Justin K. Tidmore<sup>a</sup>, Chen-Ming Lin<sup>a</sup>, Christine Herdman<sup>a</sup>, Matthew T. MacDonough<sup>a</sup>, Madhavi Sriram<sup>a</sup>, David J. Chaplin<sup>b</sup>, Mary Lynn Trawick<sup>a</sup>, and Kevin G. Pinney<sup>a\*</sup>

<sup>a</sup>Department of Chemistry and Biochemistry, Baylor University, One Bear Place #97348, Waco, Texas 76798-7348, United States

<sup>b</sup>OXiGENE Inc., 701 Gateway Boulevard, Suite 210, South San Francisco, California 94080, United States

\*Corresponding author: Kevin G. Pinney

Tel.: +1 254 710 4117

fax: +1 254 710 4272.

E-mail address: [Kevin\\_Pinney@baylor.edu](mailto:Kevin_Pinney@baylor.edu)

## Table of Contents

|                                                                             |                |
|-----------------------------------------------------------------------------|----------------|
| NMR Spectra, HPLC Traces, and HRMS for compound <b>35</b>                   | Pages S3-S9    |
| NMR Spectra, HPLC Traces, and HRMS for compound <b>36</b>                   | Pages S10-S16  |
| NMR Spectra, HPLC Traces, and HRMS for compound <b>37</b>                   | Pages S17-S24  |
| NMR Spectra, HPLC Traces, and HRMS for compound <b>38</b>                   | Pages S25-S31  |
| NMR Spectra, HPLC Traces, and HRMS for compound <b>39</b>                   | Pages S32-S37  |
| NMR Spectra, HPLC Traces, and HRMS for compound <b>41</b>                   | Pages S38-S45  |
| NMR Spectra, HPLC Traces, and HRMS for compound <b>42</b>                   | Pages S46-S52  |
| NMR Spectra, HPLC Traces, and HRMS for compound <b>43</b>                   | Pages S53-S59  |
| NMR Spectra, HPLC Traces, and HRMS for compound <b>44</b>                   | Pages S60-S65  |
| NMR Spectra, HPLC Traces, and HRMS for compound <b>47</b>                   | Pages S66-S71  |
| NMR Spectra, HPLC Traces, and HRMS for compound <b>48</b>                   | Pages S72-S78  |
| HMBC and HSQC Spectra for compound <b>38</b>                                | Pages S79-82   |
| X-Ray crystallography data for compound <b>38</b>                           | Pages S83-91   |
| X-Ray crystallography data for compound <b>39</b>                           | Pages S92-S102 |
| Mechanistic Speculation Regarding Selective Demethylation with Ionic Liquid | Pages S103     |
| Scheme and experimentals for precursor steps of compound <b>2</b>           | Pages S104-105 |
| Scheme and experimentals for alternative route to compound <b>39</b>        | Pages S106-111 |
| cLogP Calculations for compounds <b>39, 44, 45, and 48</b>                  | Pages S112     |
| Supplementary References and Notes                                          | Pages S113     |

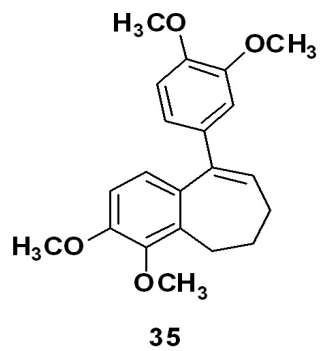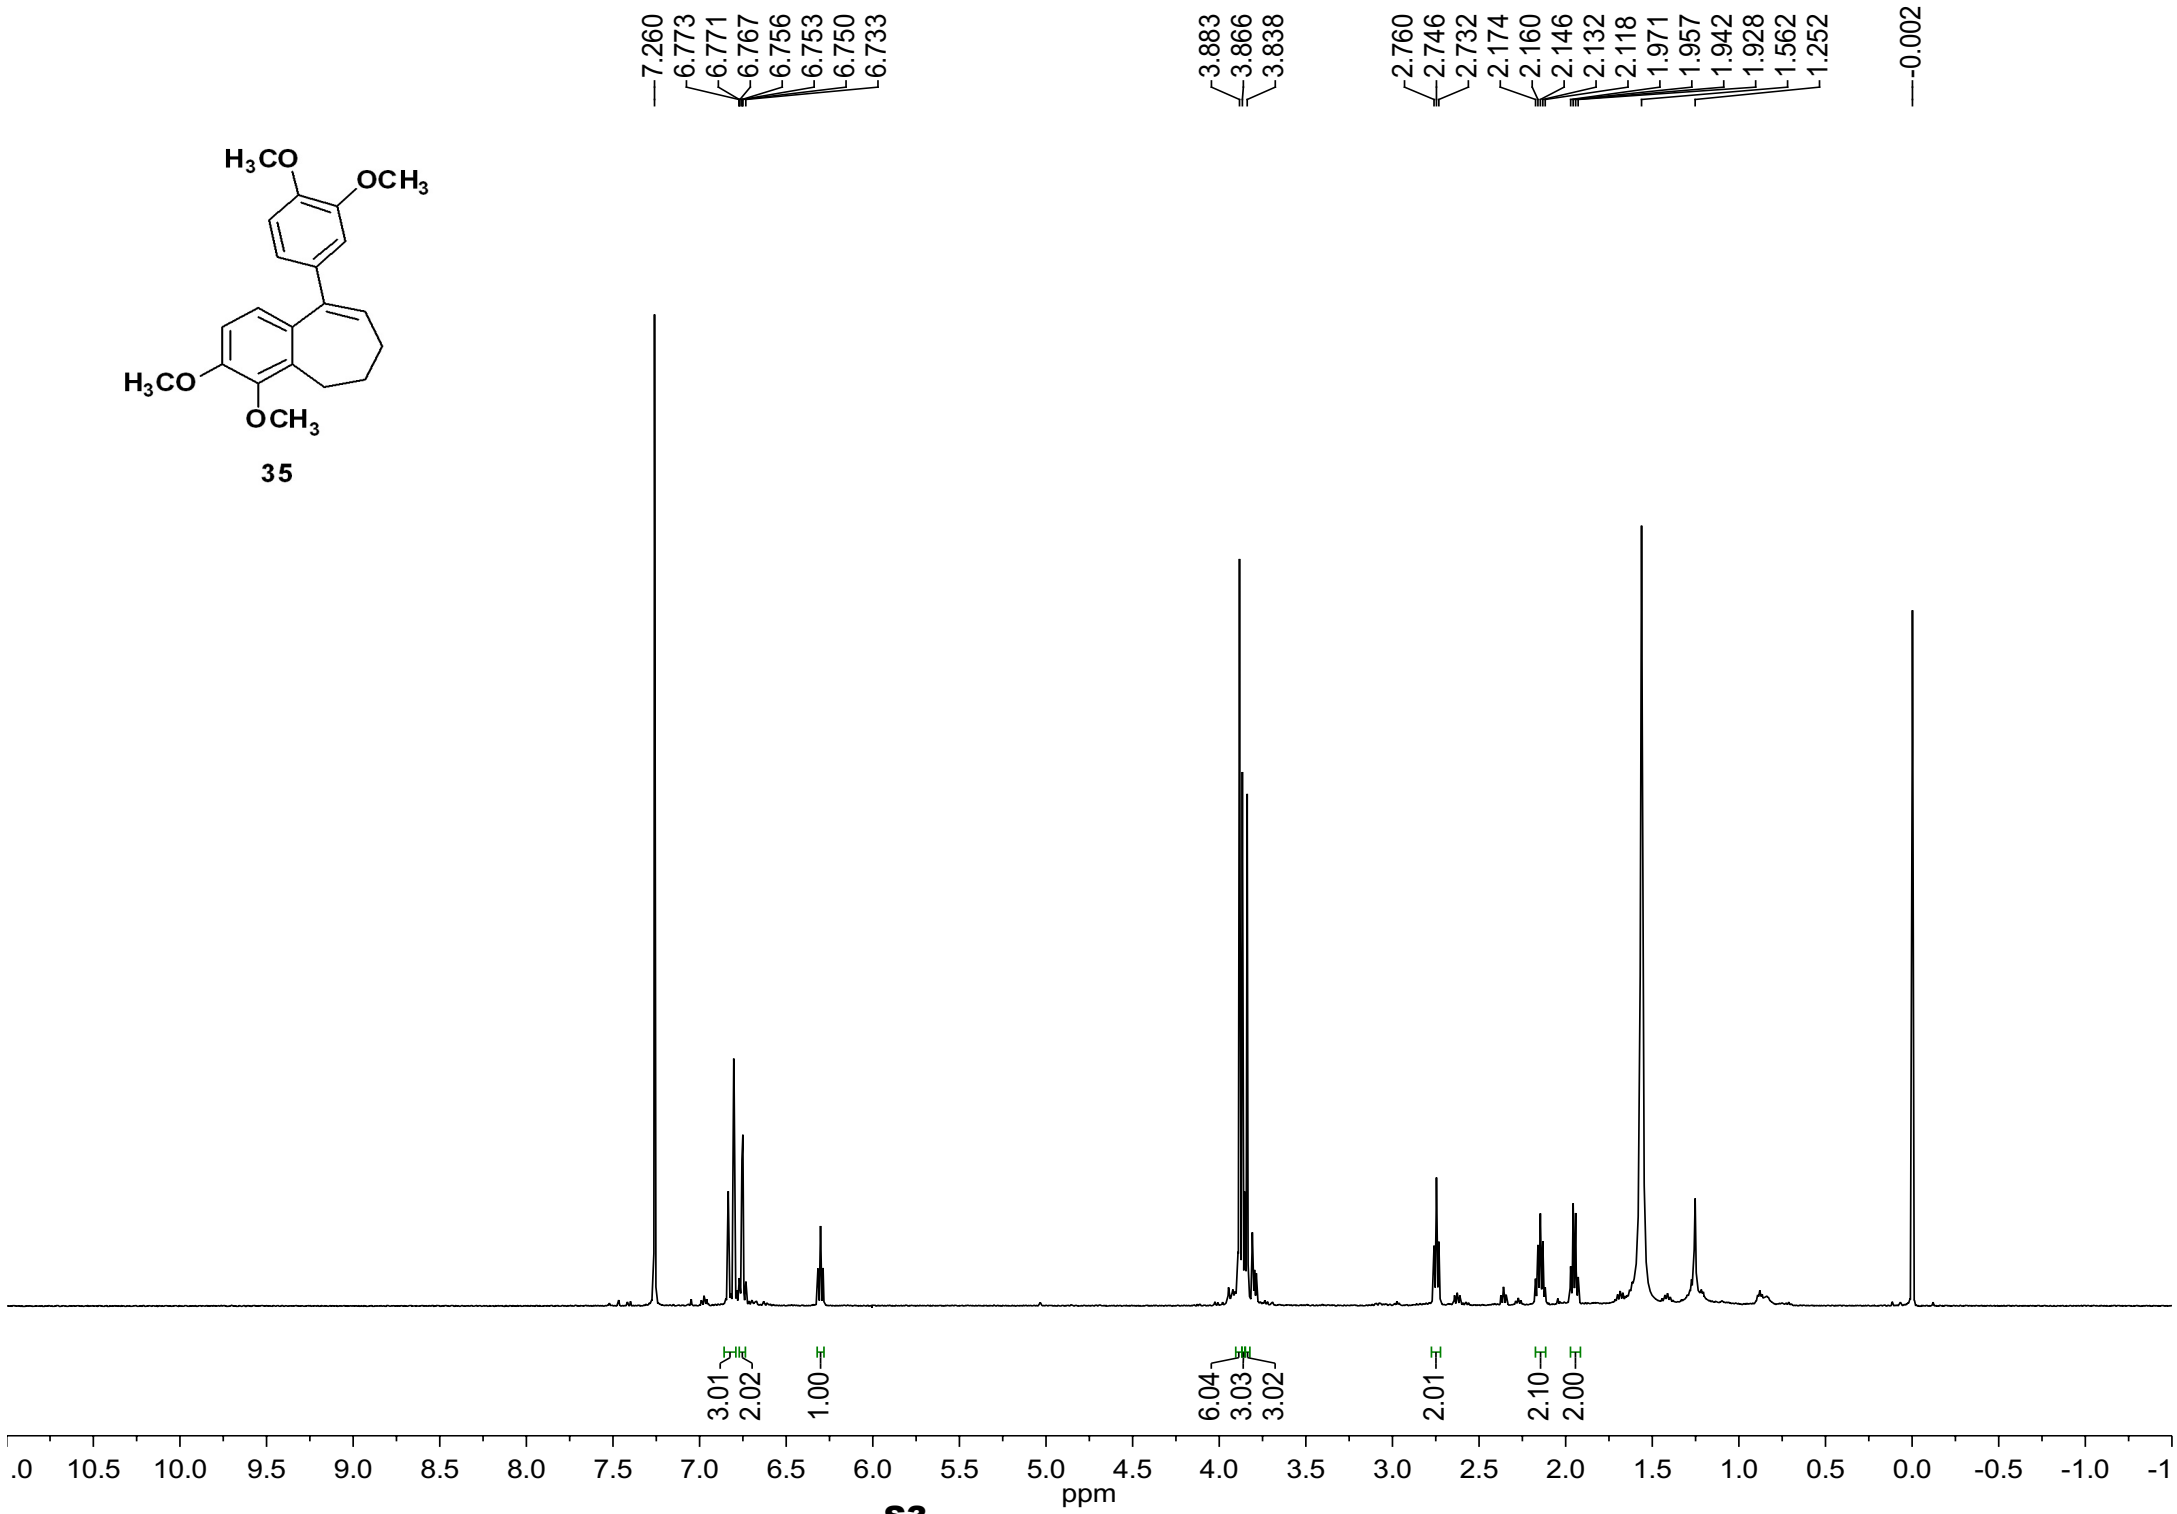

**S3**

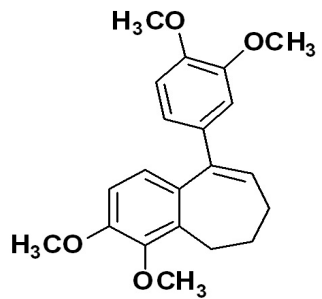

35

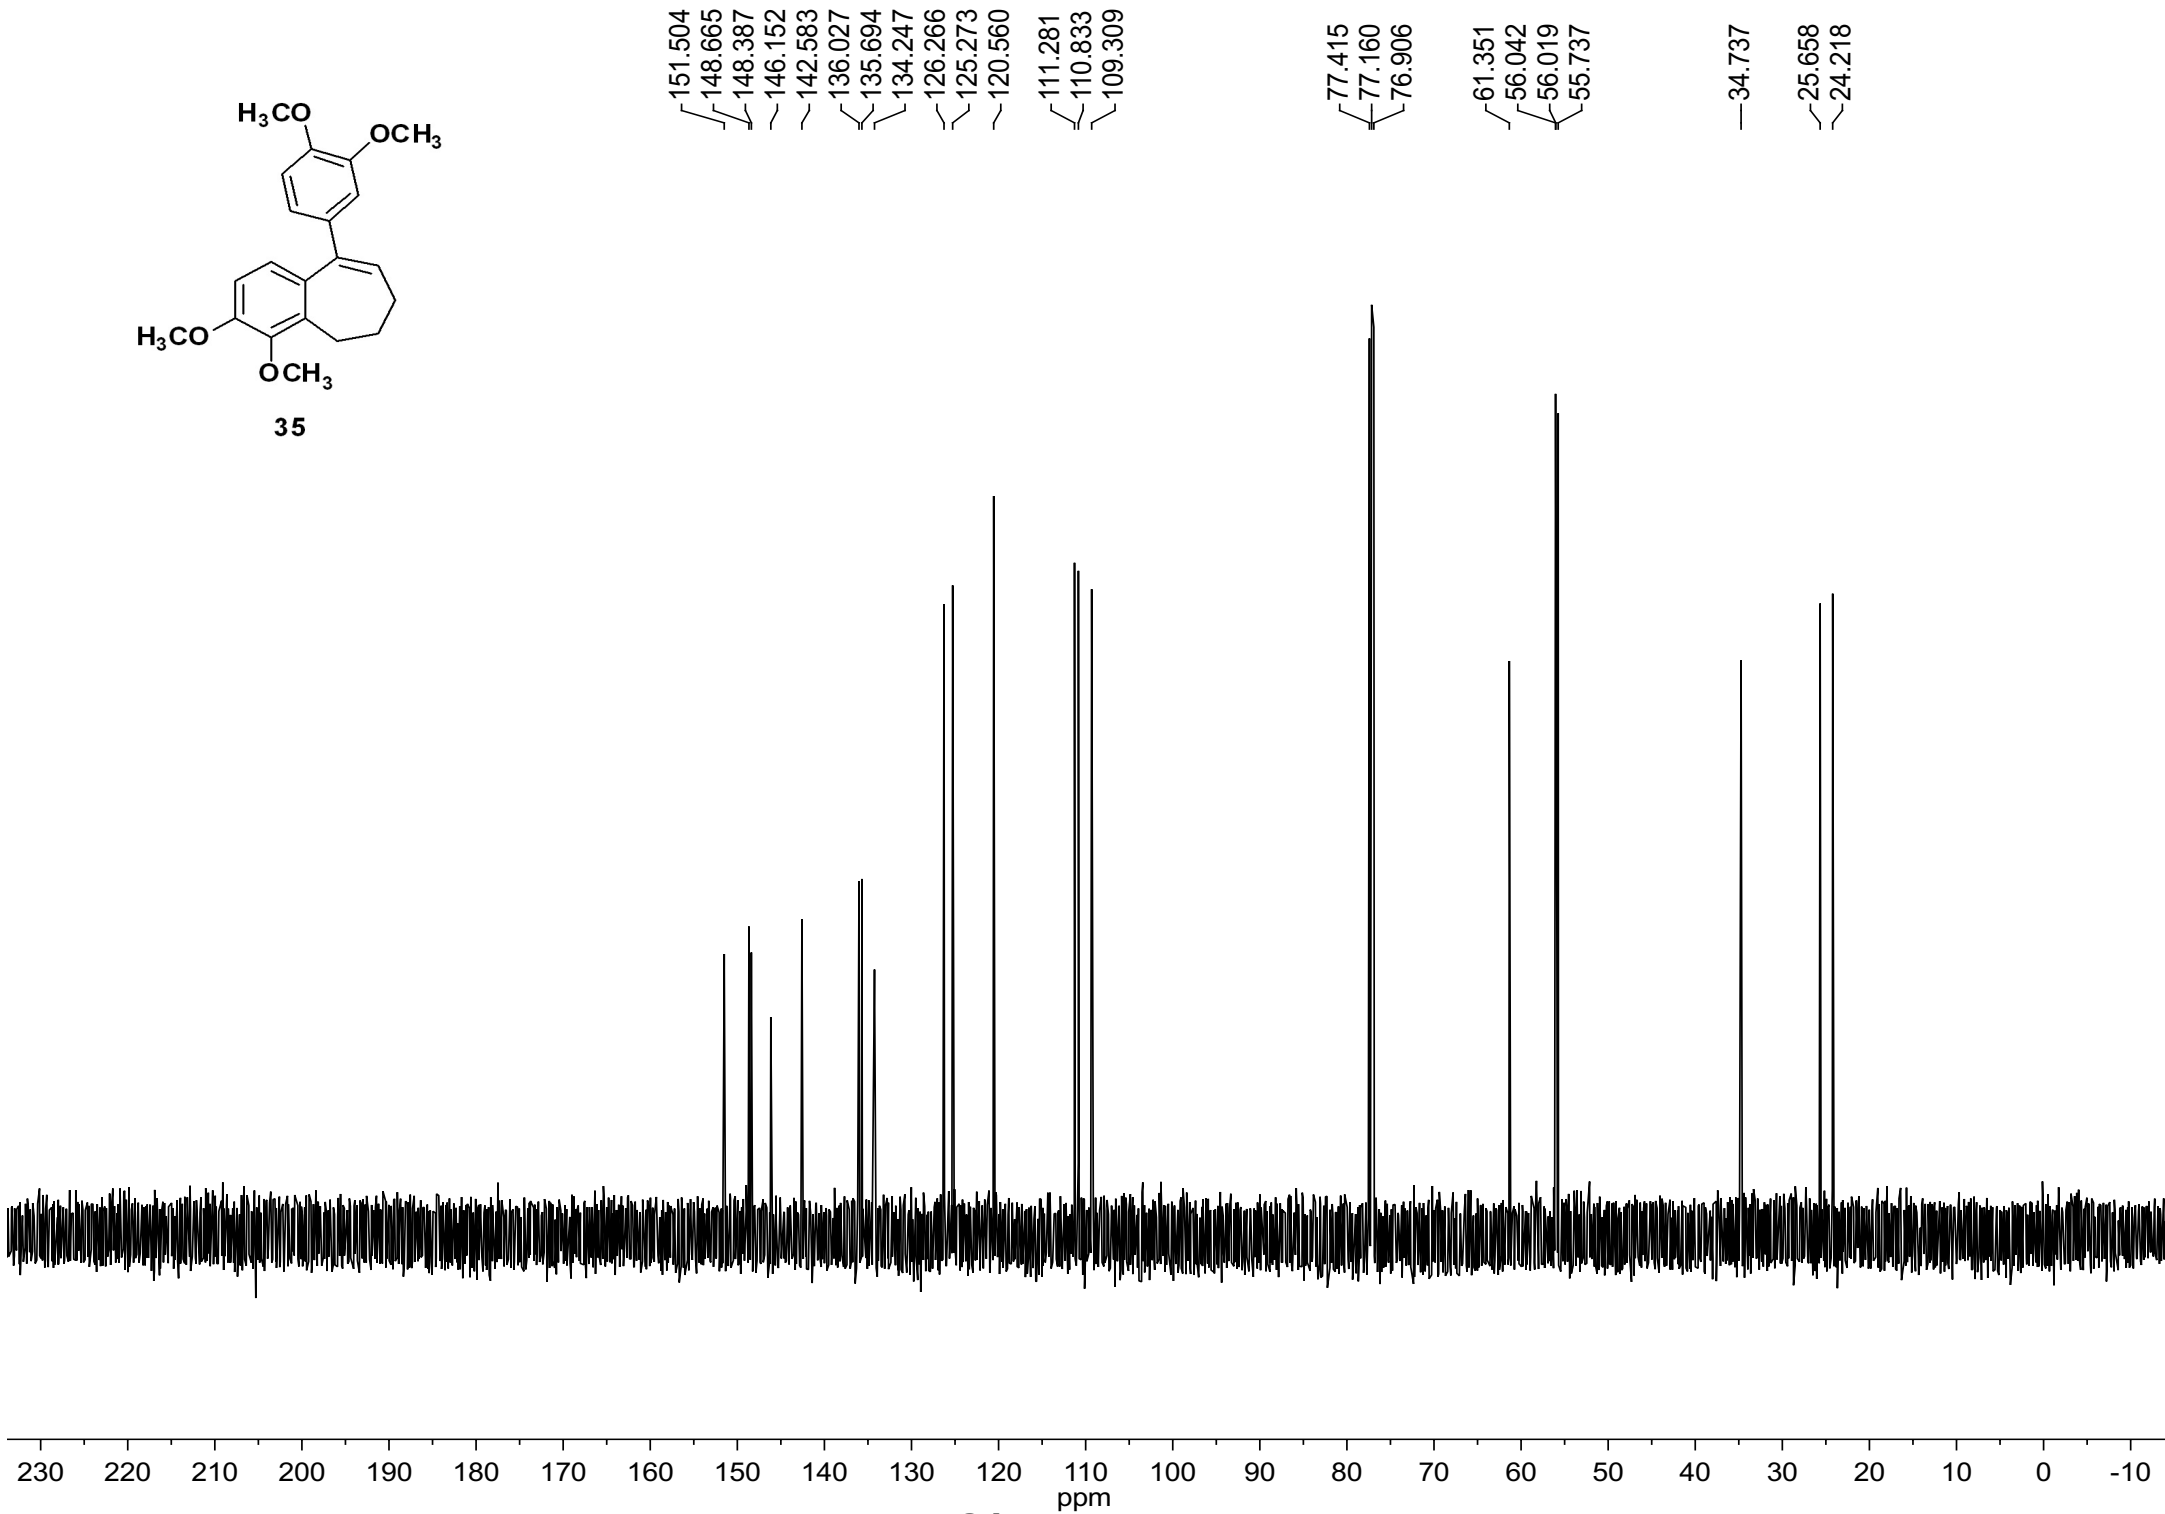

S4

Sample Name: run1

**HPLC Traces of Compound 35**

=====  
Acq. Operator : Christine  
Acq. Instrument : Instrument 1 Location : -  
Injection Date : 3/20/2013 3:51:01 PM  
Acq. Method : C:\CHEM32\1\METHODS\MASTERMETHOD.M  
Last changed : 3/20/2013 3:31:29 PM by Christine  
Analysis Method : C:\CHEM32\1\DATA\CHRISTINE\CSG\_VII\_6700002.D\DA.M (MASTERMETHOD.M)  
Last changed : 3/20/2013 5:03:40 PM by Christine

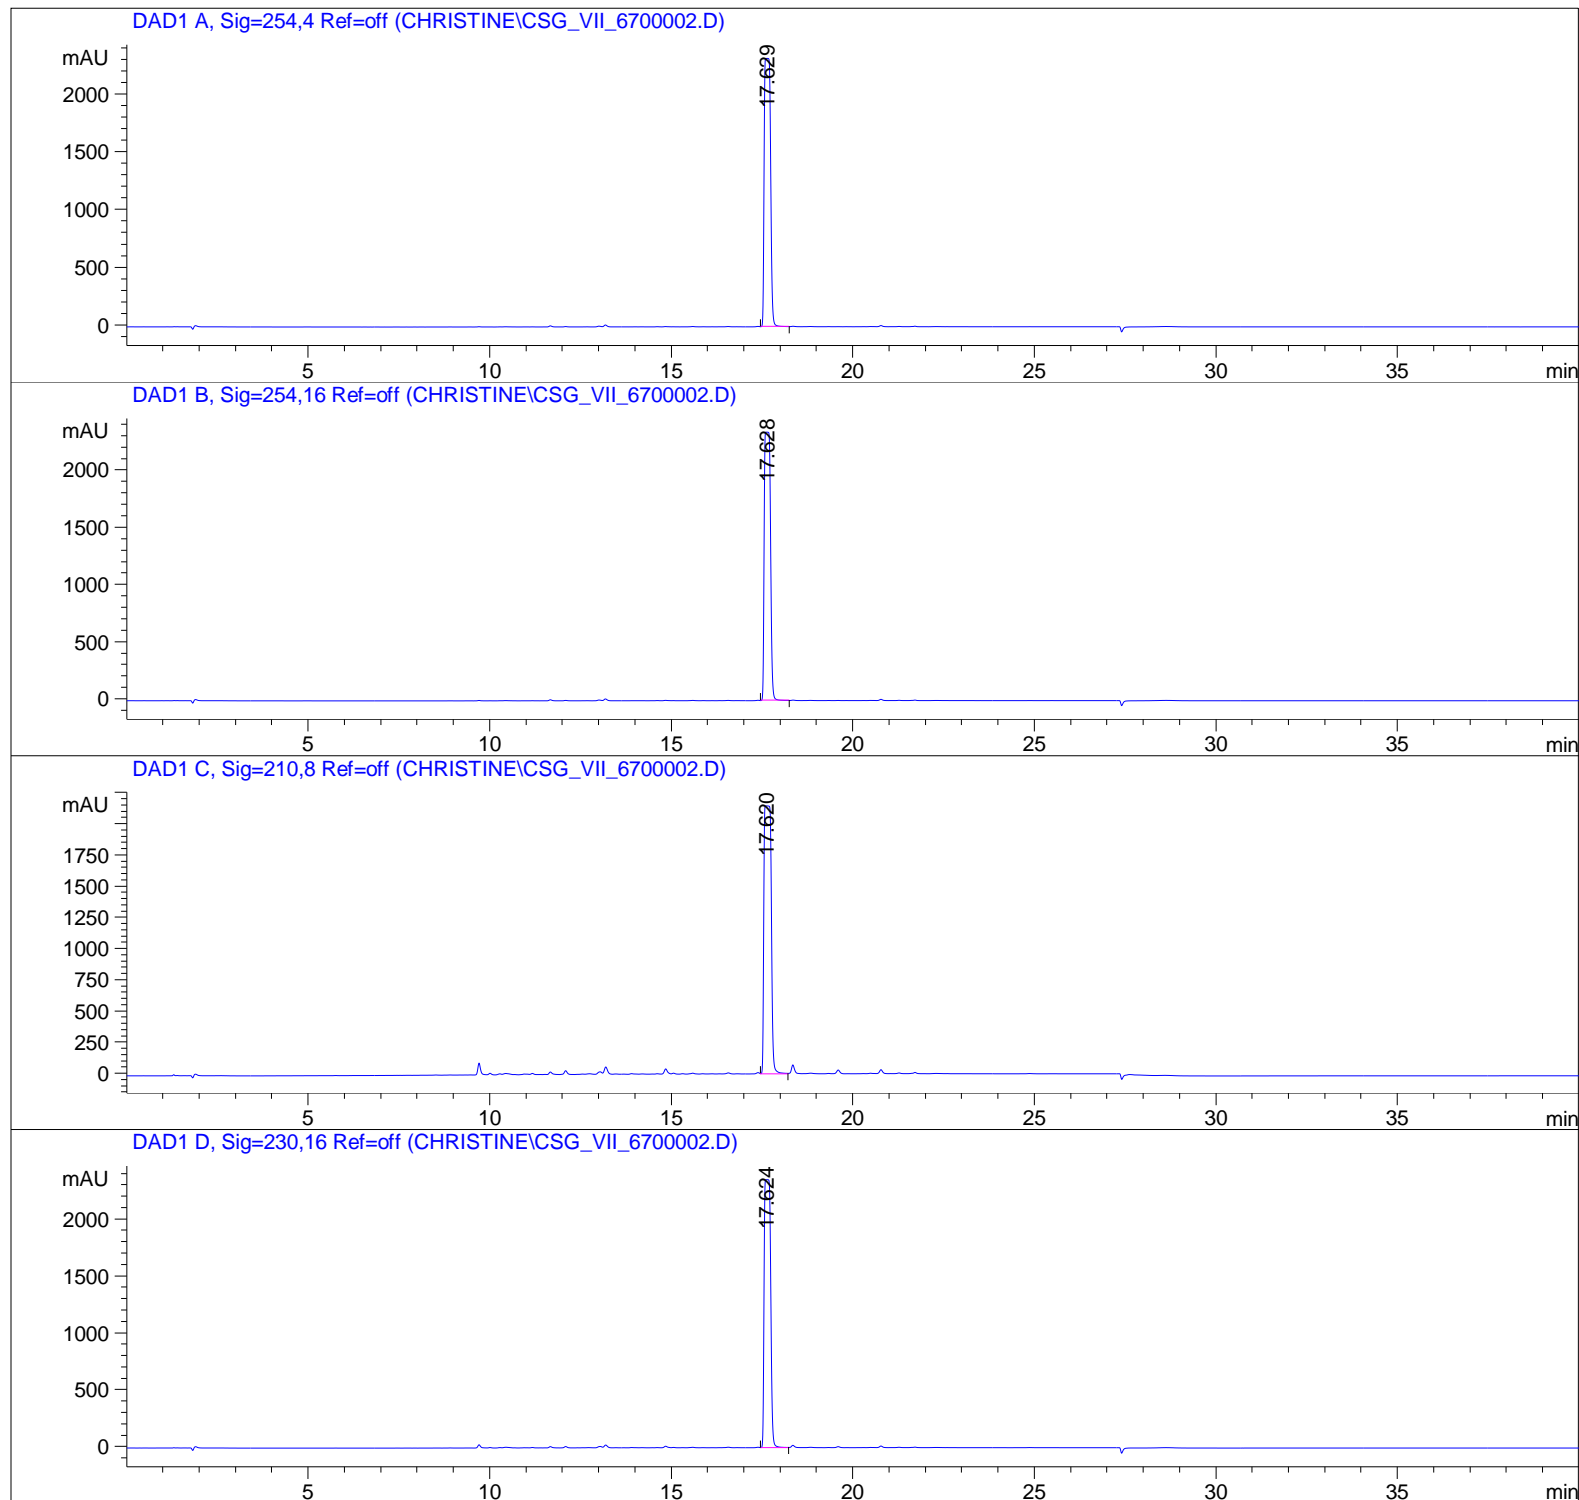**S5**

Sample Name: run1

**HPLC Traces of Compound 35**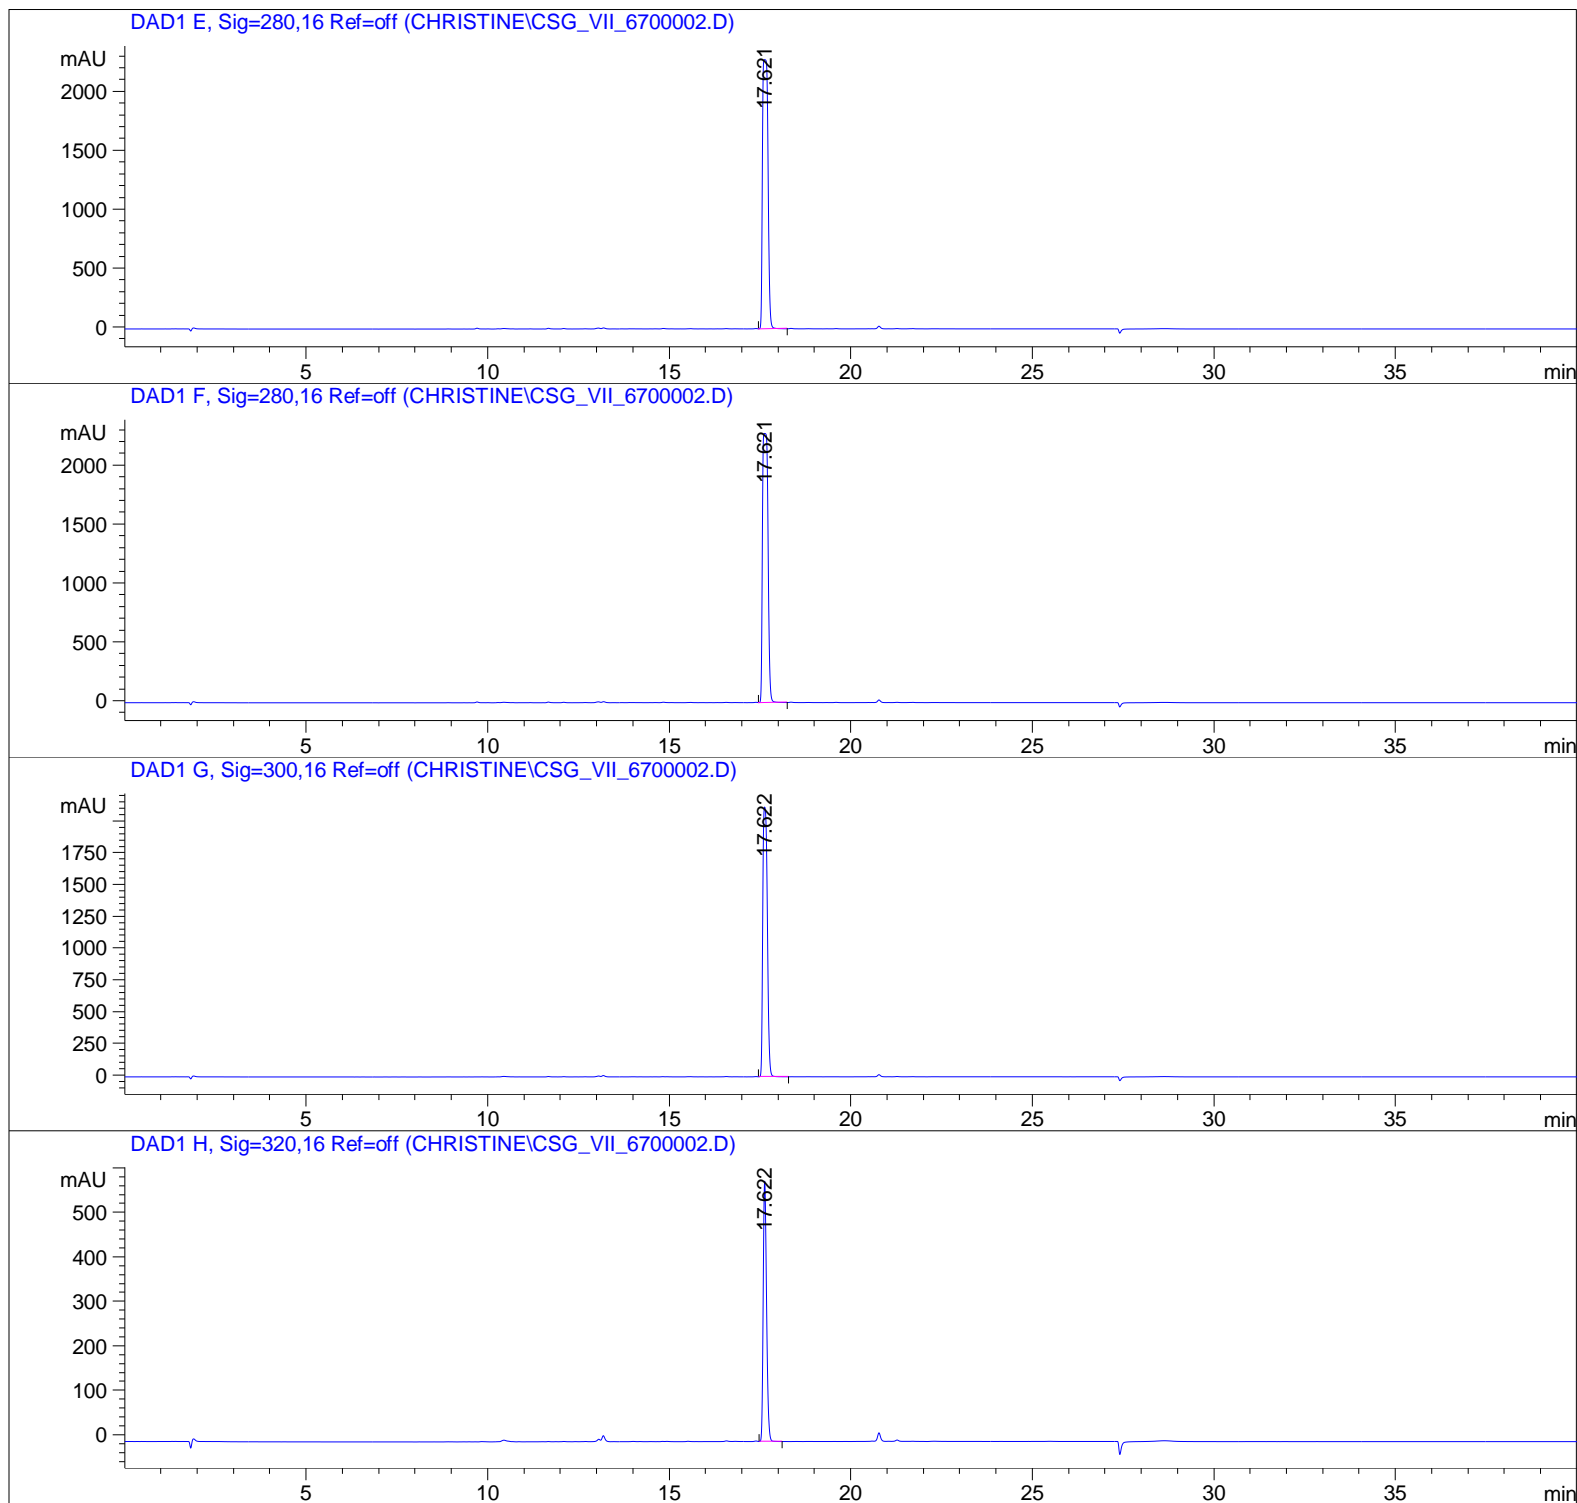=====  
Area Percent Report  
=====

Sorted By : Signal  
Multiplier : 1.0000  
Dilution : 1.0000  
Use Multiplier & Dilution Factor with ISTDs

**S6**

Sample Name: run1

**HPLC Traces of Compound 35**

Signal 1: DAD1 A, Sig=254,4 Ref=off

| Peak # | RetTime [min] | Type | Width [min] | Area [mAU*s] | Height [mAU] | Area %   |
|--------|---------------|------|-------------|--------------|--------------|----------|
| 1      | 17.629        | VV   | 0.1688      | 2.76452e4    | 2323.77466   | 100.0000 |

Totals : 2.76452e4 2323.77466

Signal 2: DAD1 B, Sig=254,16 Ref=off

| Peak # | RetTime [min] | Type | Width [min] | Area [mAU*s] | Height [mAU] | Area %   |
|--------|---------------|------|-------------|--------------|--------------|----------|
| 1      | 17.628        | VV   | 0.1908      | 2.75209e4    | 2346.52759   | 100.0000 |

Totals : 2.75209e4 2346.52759

Signal 3: DAD1 C, Sig=210,8 Ref=off

| Peak # | RetTime [min] | Type | Width [min] | Area [mAU*s] | Height [mAU] | Area %   |
|--------|---------------|------|-------------|--------------|--------------|----------|
| 1      | 17.620        | VV   | 0.1899      | 2.94289e4    | 2146.80054   | 100.0000 |

Totals : 2.94289e4 2146.80054

Signal 4: DAD1 D, Sig=230,16 Ref=off

| Peak # | RetTime [min] | Type | Width [min] | Area [mAU*s] | Height [mAU] | Area %   |
|--------|---------------|------|-------------|--------------|--------------|----------|
| 1      | 17.624        | VV   | 0.1993      | 2.85074e4    | 2354.49072   | 100.0000 |

Totals : 2.85074e4 2354.49072

Signal 5: DAD1 E, Sig=280,16 Ref=off

| Peak # | RetTime [min] | Type | Width [min] | Area [mAU*s] | Height [mAU] | Area %   |
|--------|---------------|------|-------------|--------------|--------------|----------|
| 1      | 17.621        | VV   | 0.1705      | 2.39891e4    | 2285.56982   | 100.0000 |

Totals : 2.39891e4 2285.56982

**S7**

Sample Name: run1

**HPLC Traces of Compound 35**

Signal 6: DAD1 F, Sig=280,16 Ref=off

| Peak # | RetTime [min] | Type | Width [min] | Area [mAU*s] | Height [mAU] | Area %   |
|--------|---------------|------|-------------|--------------|--------------|----------|
| 1      | 17.621        | VV   | 0.1705      | 2.39891e4    | 2285.56982   | 100.0000 |

Totals : 2.39891e4 2285.56982

Signal 7: DAD1 G, Sig=300,16 Ref=off

| Peak # | RetTime [min] | Type | Width [min] | Area [mAU*s] | Height [mAU] | Area %   |
|--------|---------------|------|-------------|--------------|--------------|----------|
| 1      | 17.622        | VB   | 0.1412      | 1.84173e4    | 2122.89526   | 100.0000 |

Totals : 1.84173e4 2122.89526

Signal 8: DAD1 H, Sig=320,16 Ref=off

| Peak # | RetTime [min] | Type | Width [min] | Area [mAU*s] | Height [mAU] | Area %   |
|--------|---------------|------|-------------|--------------|--------------|----------|
| 1      | 17.622        | VB   | 0.0987      | 3754.10571   | 586.34613    | 100.0000 |

Totals : 3754.10571 586.34613

=====  
\*\*\* End of Report \*\*\*



# HRMS of Compound 35

C:\Xcalibur\...ICSG-VII-67\_130327182827

3/27/2013 6:37:10 PM

CSG-VII-67

CSG-VII-67\_130327182827 #2 RT: 0.01 AV: 1 NL: 2.89E7  
T: FTMS + p ESI Full ms [150.00-1000.00]

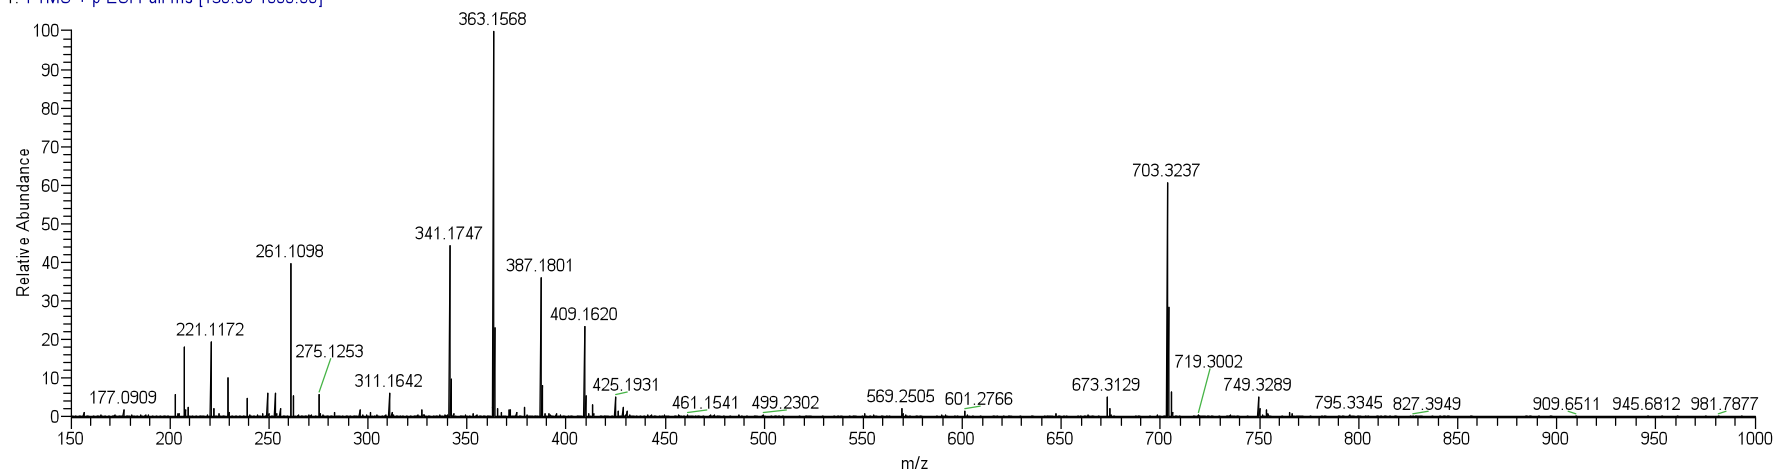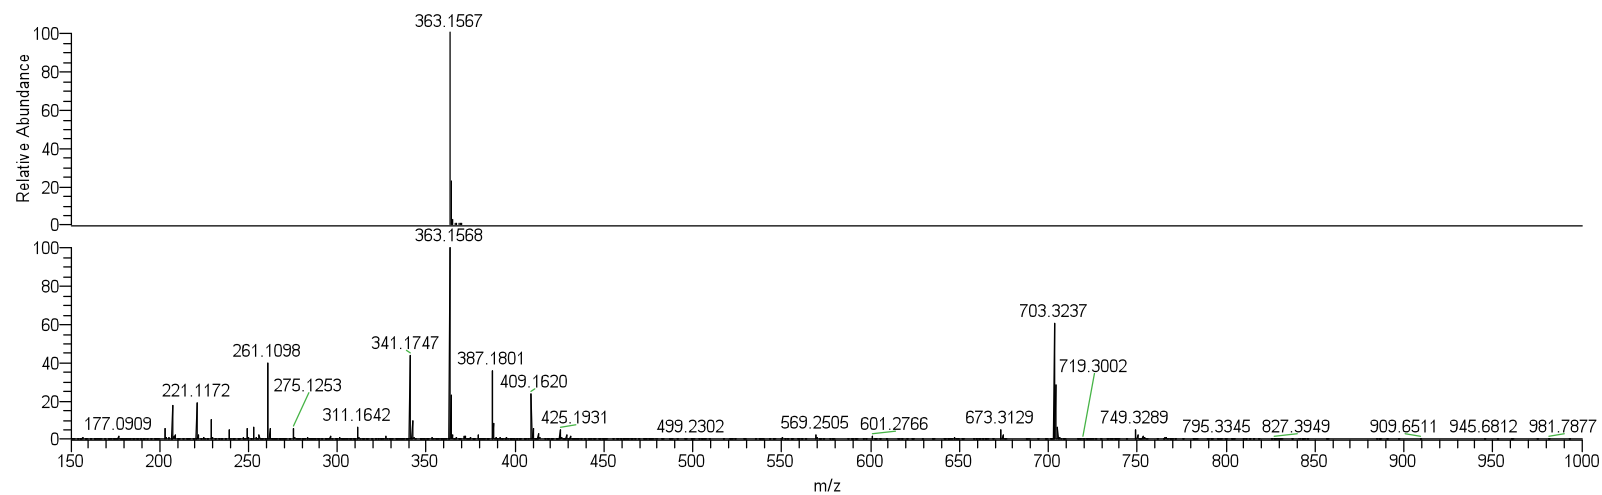

NL:  
7.88E5

C<sub>21</sub>H<sub>24</sub>O<sub>4</sub>Na:  
C<sub>21</sub>H<sub>24</sub>O<sub>4</sub>Na<sub>1</sub>  
pa Chrg 1

NL:  
2.89E7  
CSG-VII-  
67\_130327182827#2  
RT: 0.01 AV: 1 T:  
FTMS + p ESI Full ms  
[150.00-1000.00]

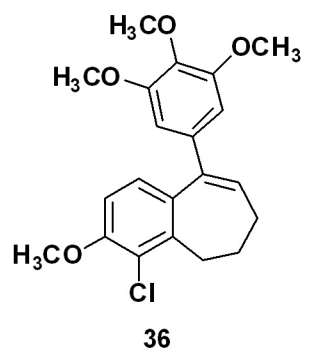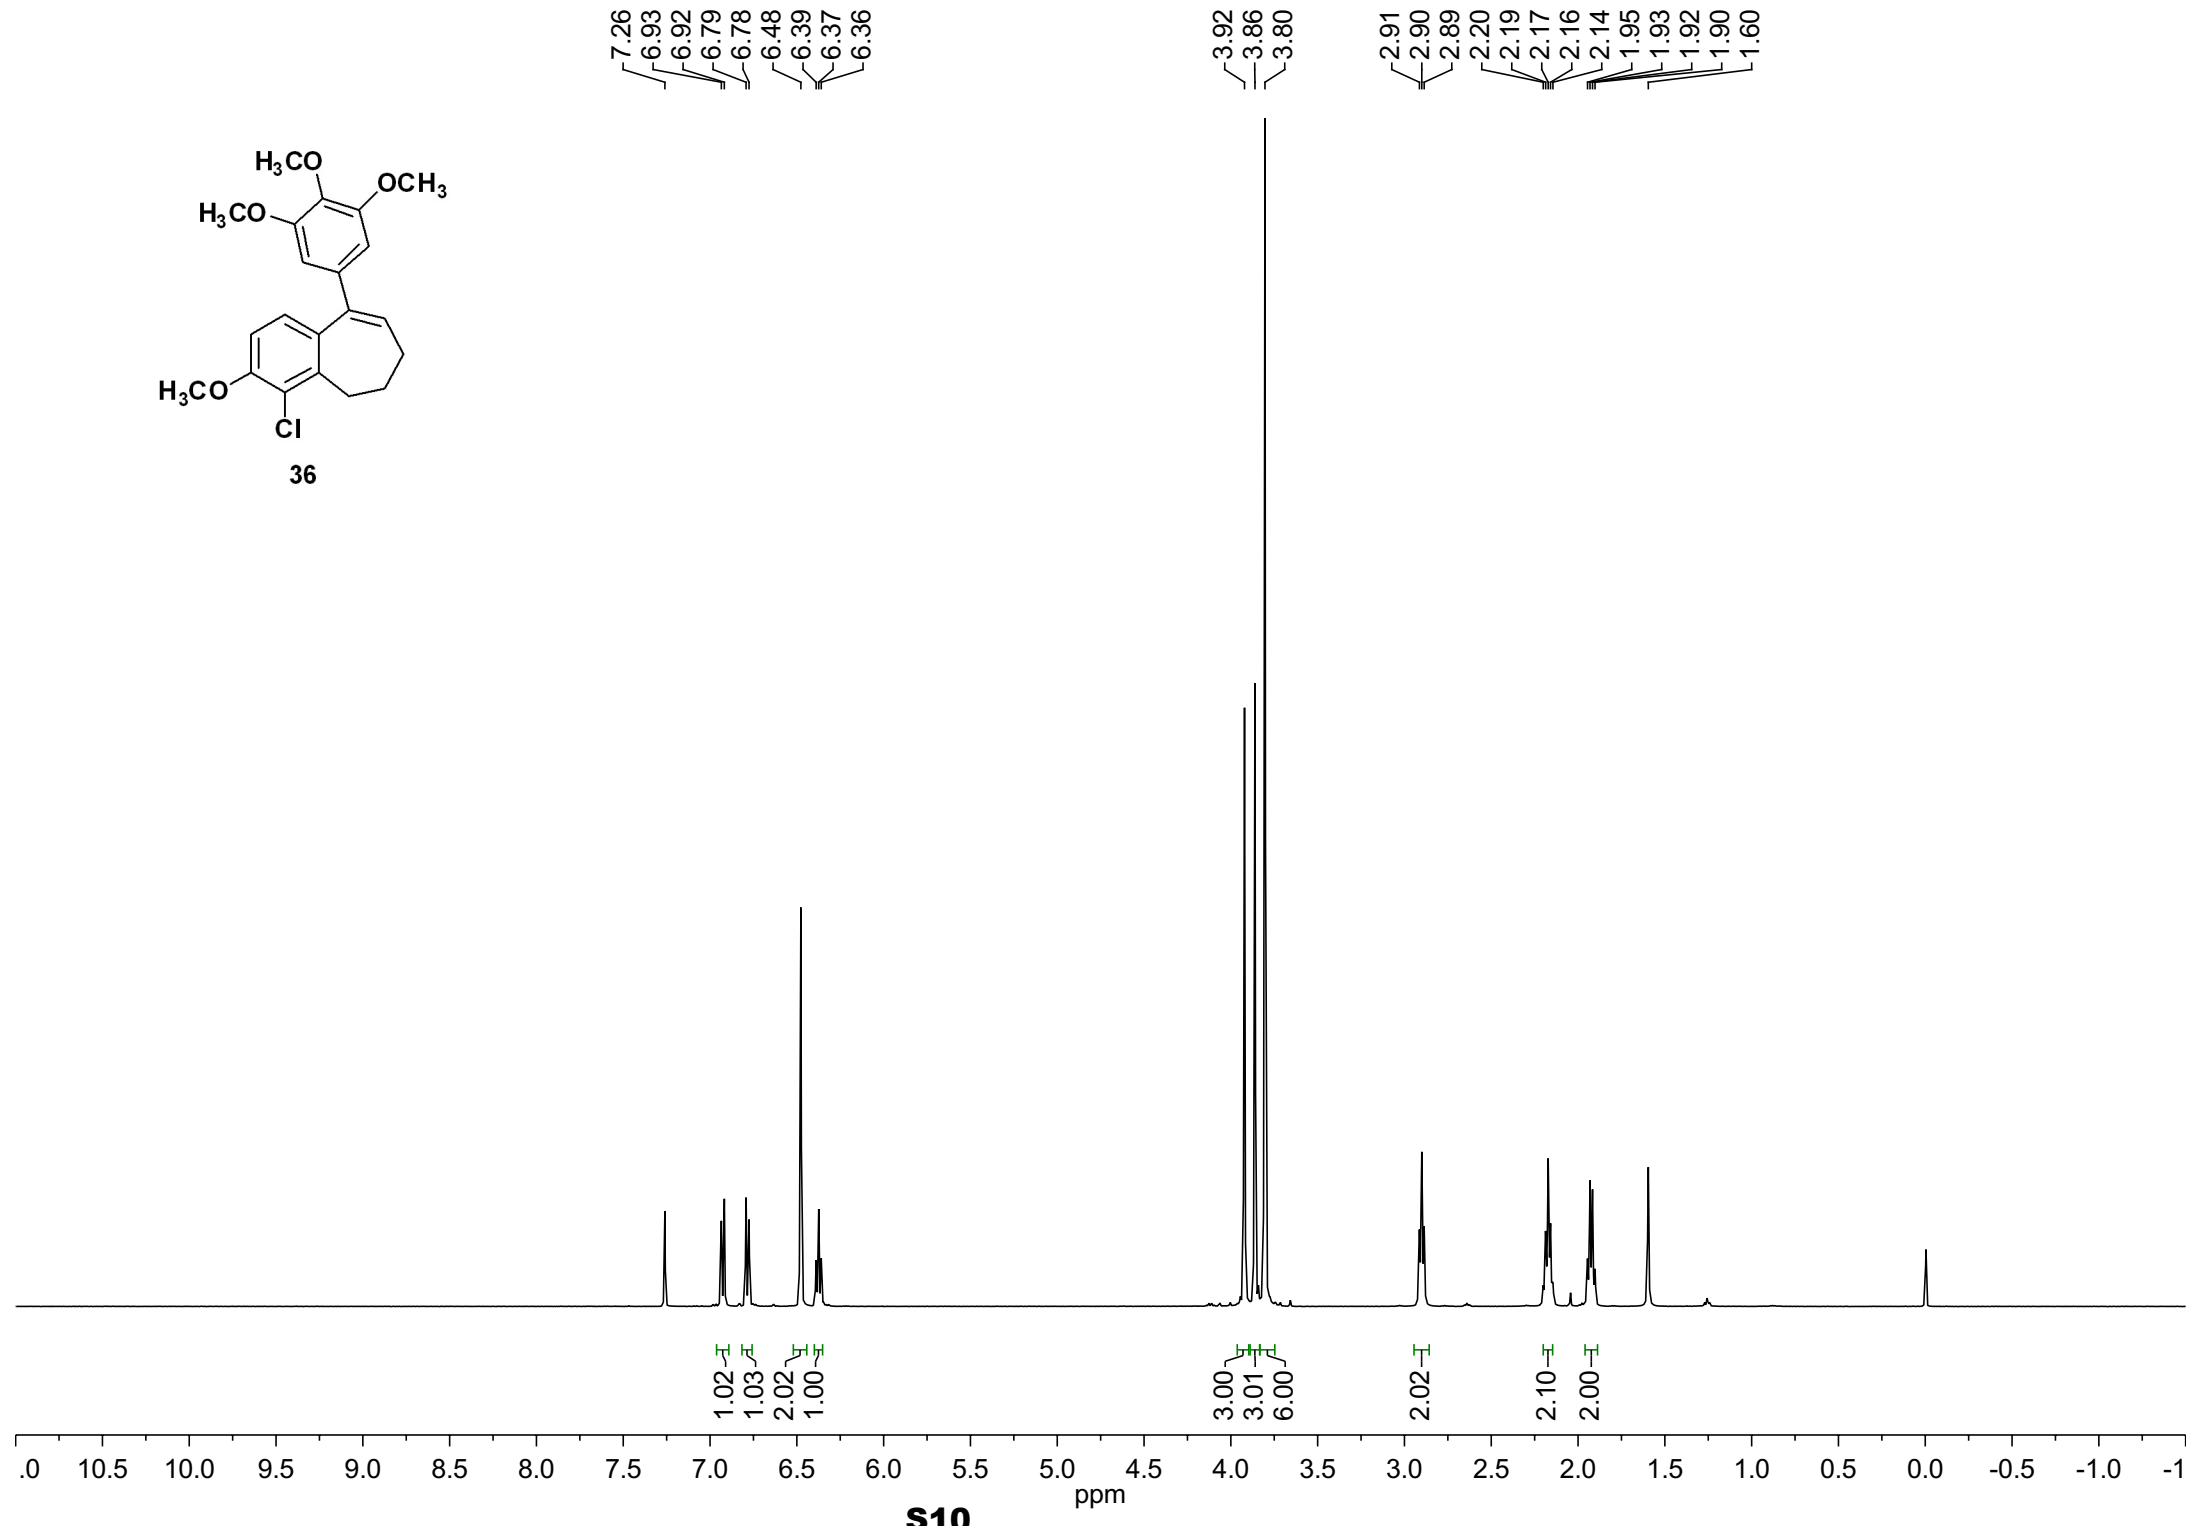

S10

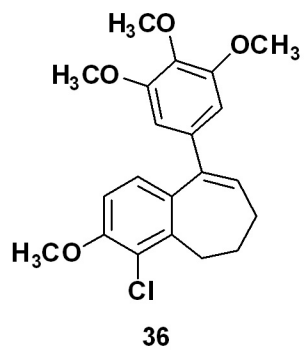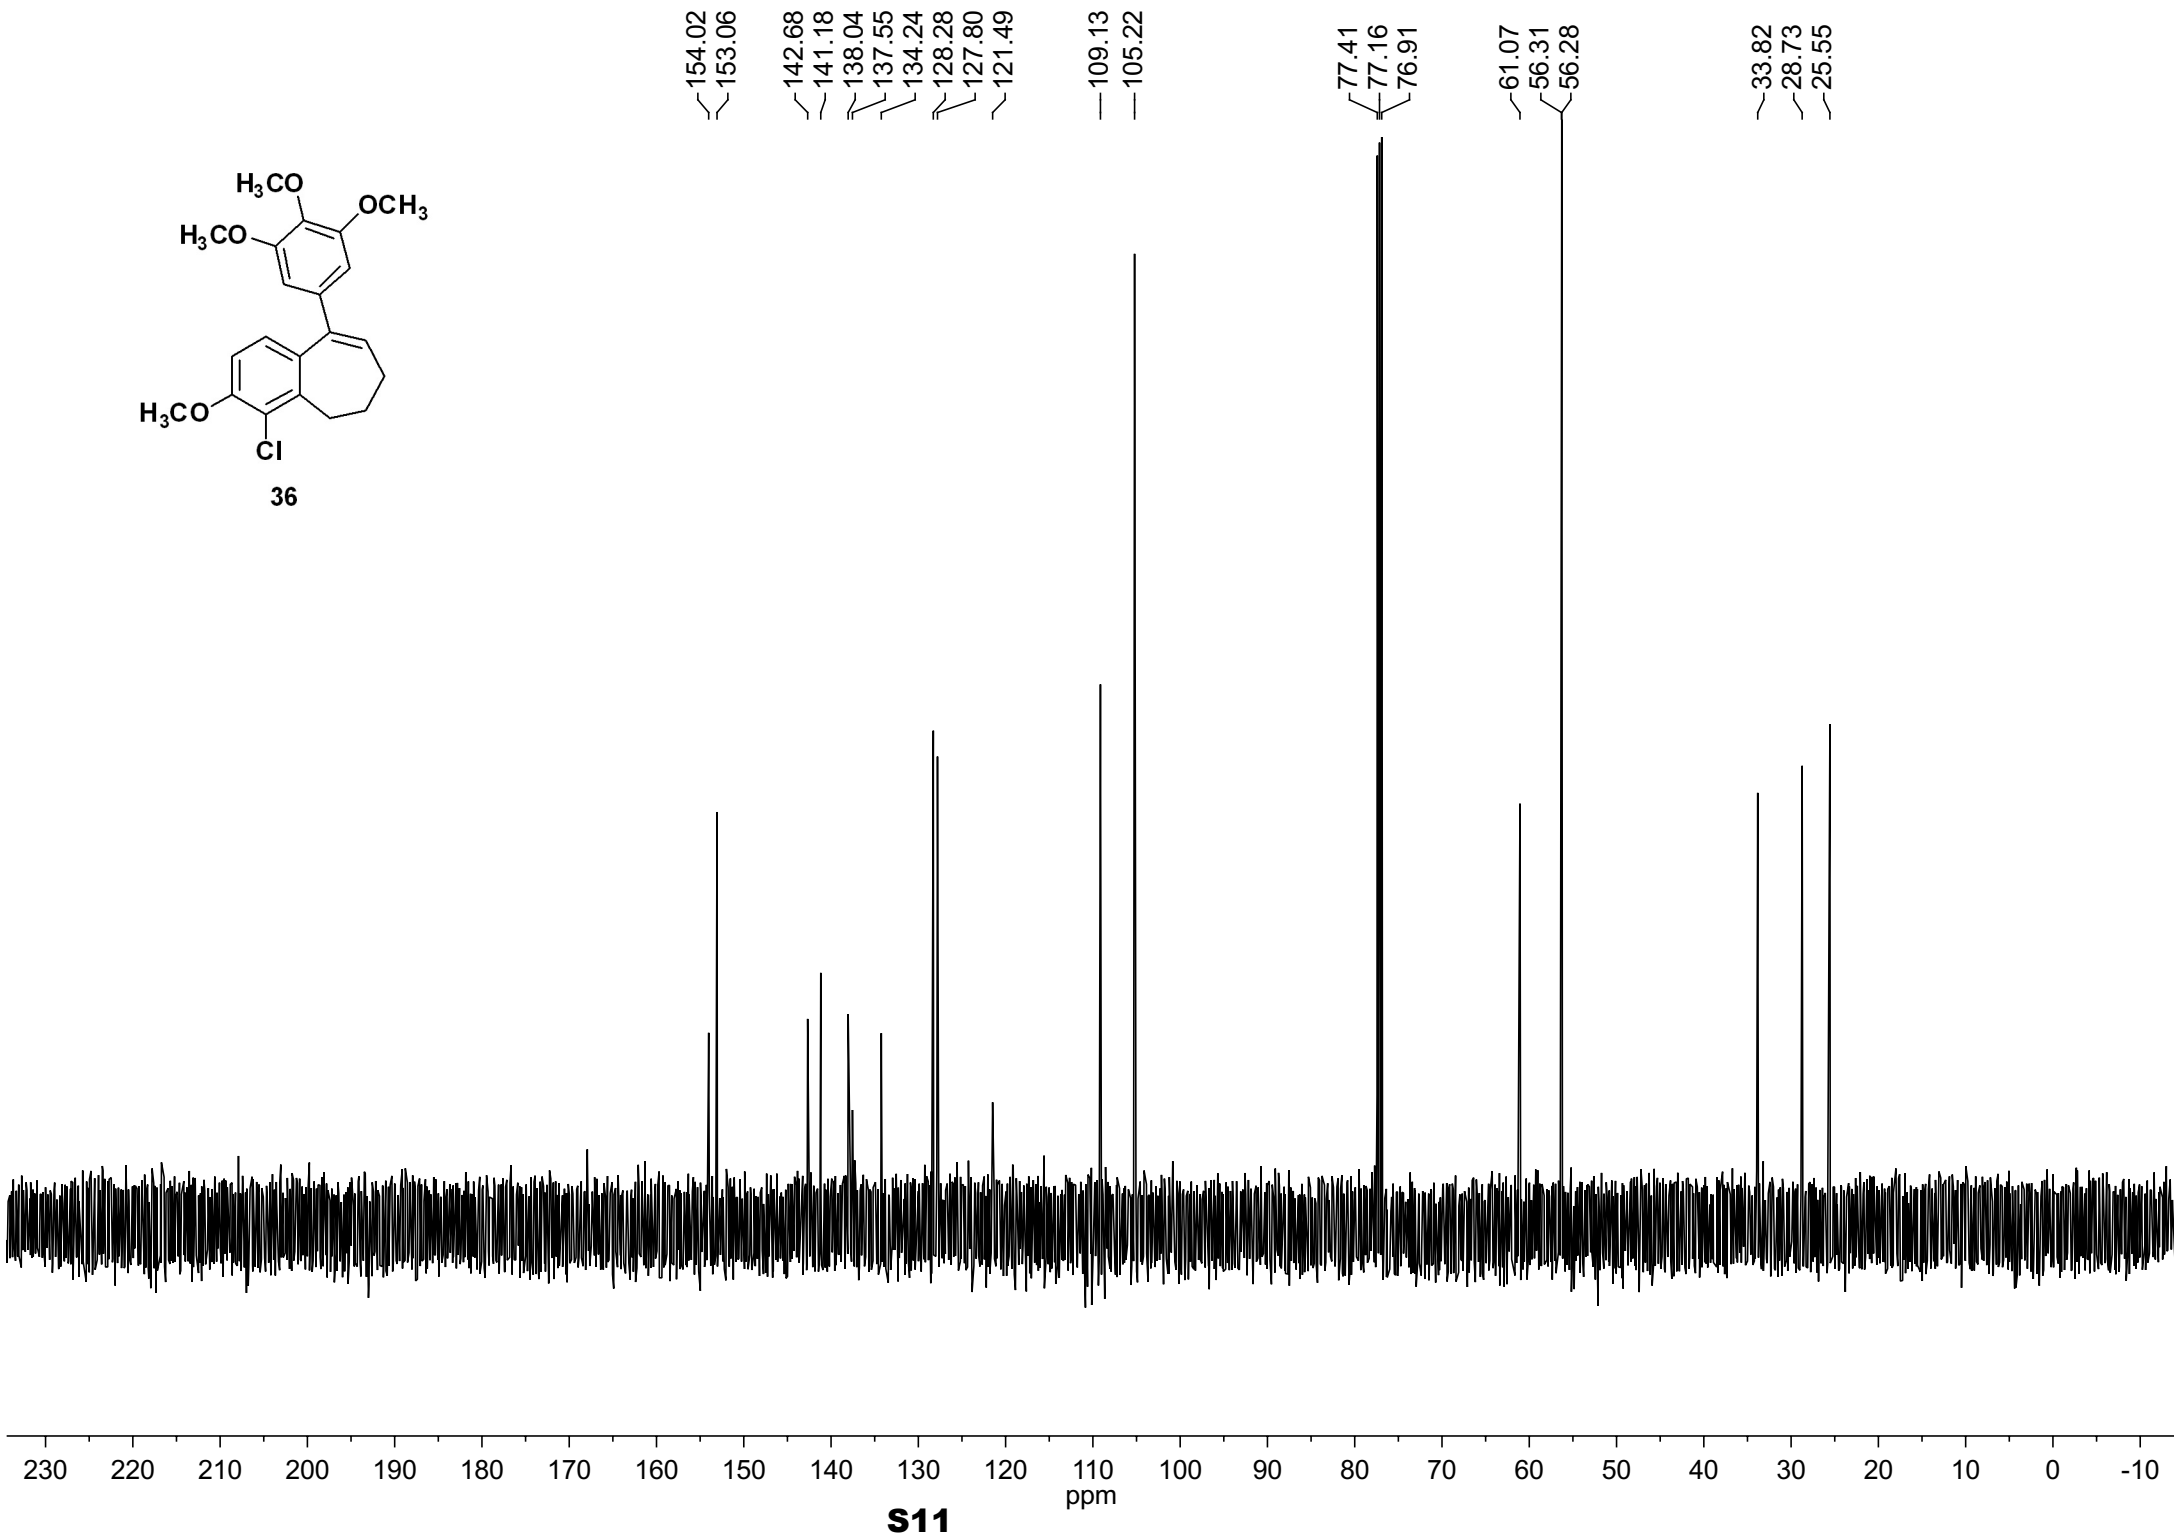

Sample Name: run1

### HPLC Traces of Compound 36

=====  
Acq. Operator : Matt Mac  
Acq. Instrument : Instrument 1 Location : -  
Injection Date : 3/18/2013 11:39:53 AM  
Acq. Method : C:\CHEM32\1\METHODS\MASTERMETHOD.M  
Last changed : 3/18/2013 11:33:23 AM by Matt Mac  
Analysis Method : C:\CHEM32\1\DATA\MATT MAC\RT-5-95000027.D\DA.M (MASTERMETHOD.M)  
Last changed : 3/25/2013 7:45:37 PM by Christine

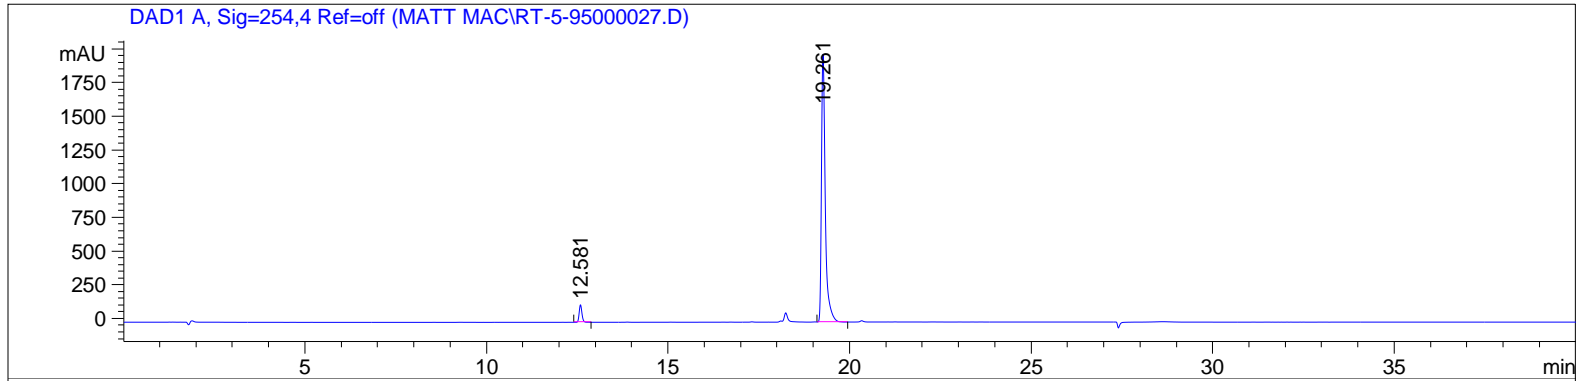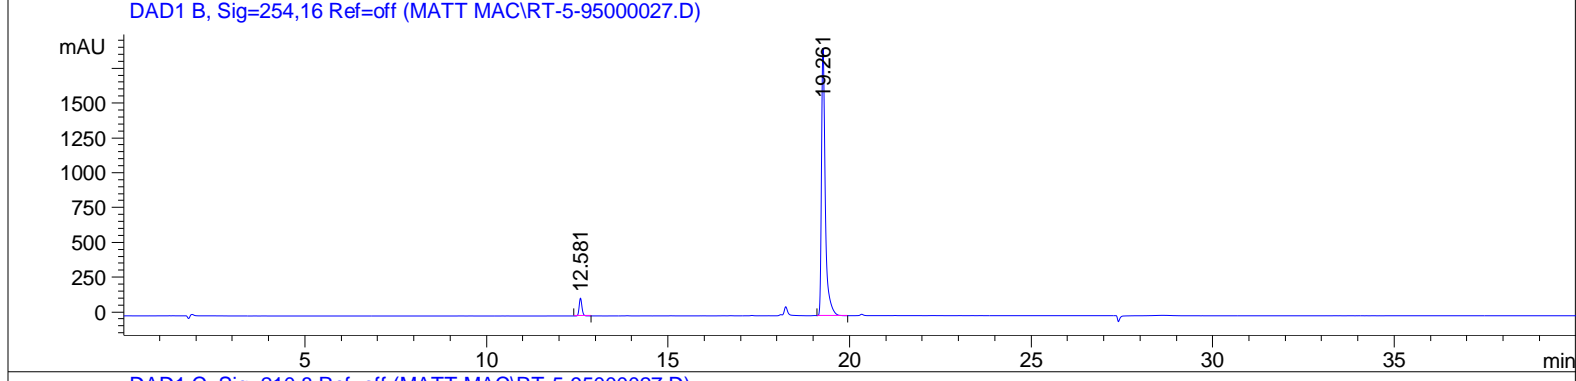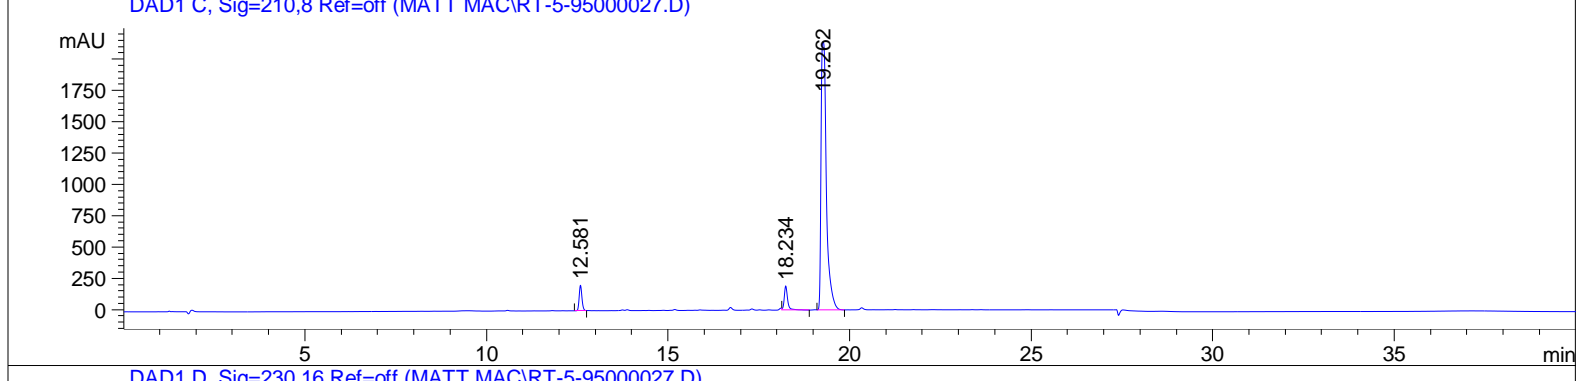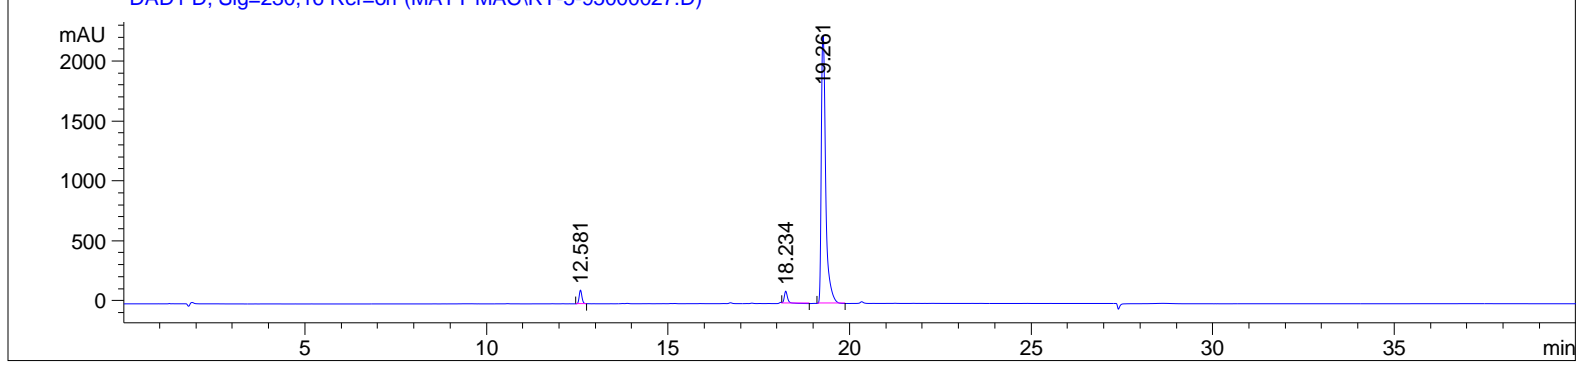

**S12**

Sample Name: run1

### HPLC Traces of Compound 36

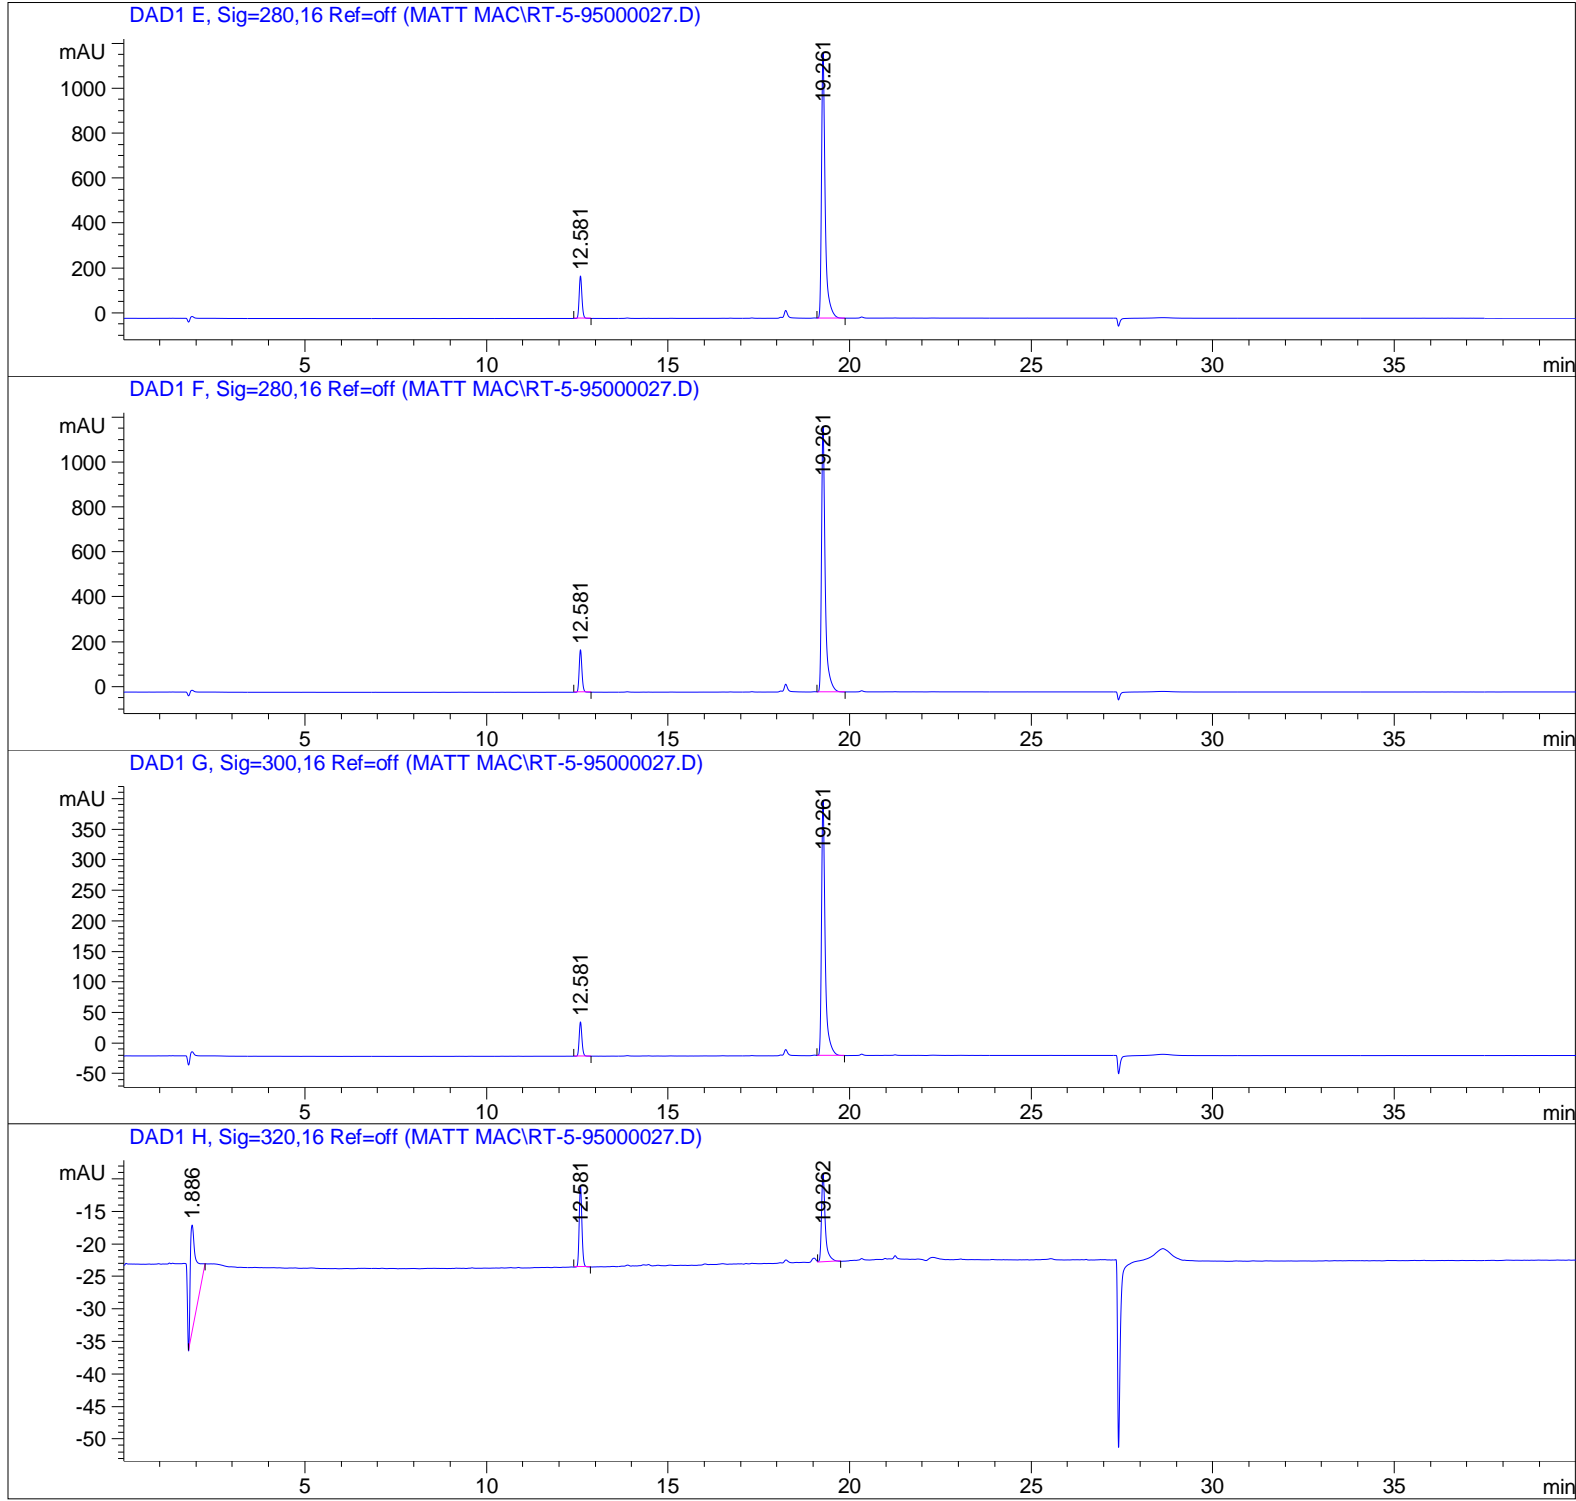

=====  
Area Percent Report  
=====

Sorted By : Signal  
Multiplier : 1.0000  
Dilution : 1.0000  
Use Multiplier & Dilution Factor with ISTDs

**S13**

Sample Name: run1

**HPLC Traces of Compound 36**

Signal 1: DAD1 A, Sig=254,4 Ref=off

| Peak # | RetTime [min] | Type | Width [min] | Area [mAU*s] | Height [mAU] | Area %  |
|--------|---------------|------|-------------|--------------|--------------|---------|
| 1      | 12.581        | BB   | 0.0815      | 681.45850    | 129.36571    | 4.4386  |
| 2      | 19.261        | VB   | 0.1121      | 1.46717e4    | 1989.12549   | 95.5614 |

Totals :                                   1.53531e4   2118.49120

Signal 2: DAD1 B, Sig=254,16 Ref=off

| Peak # | RetTime [min] | Type | Width [min] | Area [mAU*s] | Height [mAU] | Area %  |
|--------|---------------|------|-------------|--------------|--------------|---------|
| 1      | 12.581        | BB   | 0.0815      | 671.32812    | 127.42695    | 4.5695  |
| 2      | 19.261        | VB   | 0.1090      | 1.40203e4    | 1924.28955   | 95.4305 |

Totals :                                   1.46917e4   2051.71650

Signal 3: DAD1 C, Sig=210,8 Ref=off

| Peak # | RetTime [min] | Type | Width [min] | Area [mAU*s] | Height [mAU] | Area %  |
|--------|---------------|------|-------------|--------------|--------------|---------|
| 1      | 12.581        | BV   | 0.0815      | 1069.45410   | 202.71822    | 4.3974  |
| 2      | 18.234        | VB   | 0.0988      | 1267.77356   | 192.65639    | 5.2128  |
| 3      | 19.262        | VV   | 0.1598      | 2.19831e4    | 2140.38672   | 90.3898 |

Totals :                                   2.43203e4   2535.76132

Signal 4: DAD1 D, Sig=230,16 Ref=off

| Peak # | RetTime [min] | Type | Width [min] | Area [mAU*s] | Height [mAU] | Area %  |
|--------|---------------|------|-------------|--------------|--------------|---------|
| 1      | 12.581        | BB   | 0.0811      | 596.29034    | 113.85712    | 2.9539  |
| 2      | 18.234        | VB   | 0.1015      | 707.17499    | 103.75703    | 3.5032  |
| 3      | 19.261        | VB   | 0.1304      | 1.88831e4    | 2238.41504   | 93.5429 |

Totals :                                   2.01866e4   2456.02918

Sample Name: run1

### HPLC Traces of Compound 36

Signal 5: DAD1 E, Sig=280,16 Ref=off

| Peak # | RetTime [min] | Type | Width [min] | Area [mAU*s] | Height [mAU] | Area %  |
|--------|---------------|------|-------------|--------------|--------------|---------|
| 1      | 12.581        | BB   | 0.0813      | 991.66333    | 188.65477    | 10.6786 |
| 2      | 19.261        | VB   | 0.1037      | 8294.79199   | 1184.30872   | 89.3214 |

Totals : 9286.45532 1372.96349

Signal 6: DAD1 F, Sig=280,16 Ref=off

| Peak # | RetTime [min] | Type | Width [min] | Area [mAU*s] | Height [mAU] | Area %  |
|--------|---------------|------|-------------|--------------|--------------|---------|
| 1      | 12.581        | BB   | 0.0813      | 991.66333    | 188.65477    | 10.6786 |
| 2      | 19.261        | VB   | 0.1037      | 8294.79199   | 1184.30872   | 89.3214 |

Totals : 9286.45532 1372.96349

Signal 7: DAD1 G, Sig=300,16 Ref=off

| Peak # | RetTime [min] | Type | Width [min] | Area [mAU*s] | Height [mAU] | Area %  |
|--------|---------------|------|-------------|--------------|--------------|---------|
| 1      | 12.581        | BB   | 0.0814      | 294.68988    | 55.99483     | 9.1683  |
| 2      | 19.261        | VB   | 0.1033      | 2919.53296   | 419.03241    | 90.8317 |

Totals : 3214.22284 475.02724

Signal 8: DAD1 H, Sig=320,16 Ref=off

| Peak # | RetTime [min] | Type | Width [min] | Area [mAU*s] | Height [mAU] | Area %  |
|--------|---------------|------|-------------|--------------|--------------|---------|
| 1      | 1.886         | BB   | 0.1714      | 198.32713    | 16.60401     | 54.6452 |
| 2      | 12.581        | BB   | 0.0816      | 65.78312     | 12.45629     | 18.1253 |
| 3      | 19.262        | VB   | 0.1069      | 98.82568     | 13.57811     | 27.2295 |

Totals : 362.93594 42.63841

\*\*\* End of Report \*\*\*

# HRMS of Compound 36

C:\Xcalibur\...IRT-5-95\_130328104337

3/28/2013 10:43:38 AM

RT-5-95

RT-5-95\_130328104337 #3 RT: 0.03 AV: 1 NL: 4.68E6  
T: FTMS + p ESI Full ms [100.00-1000.00]

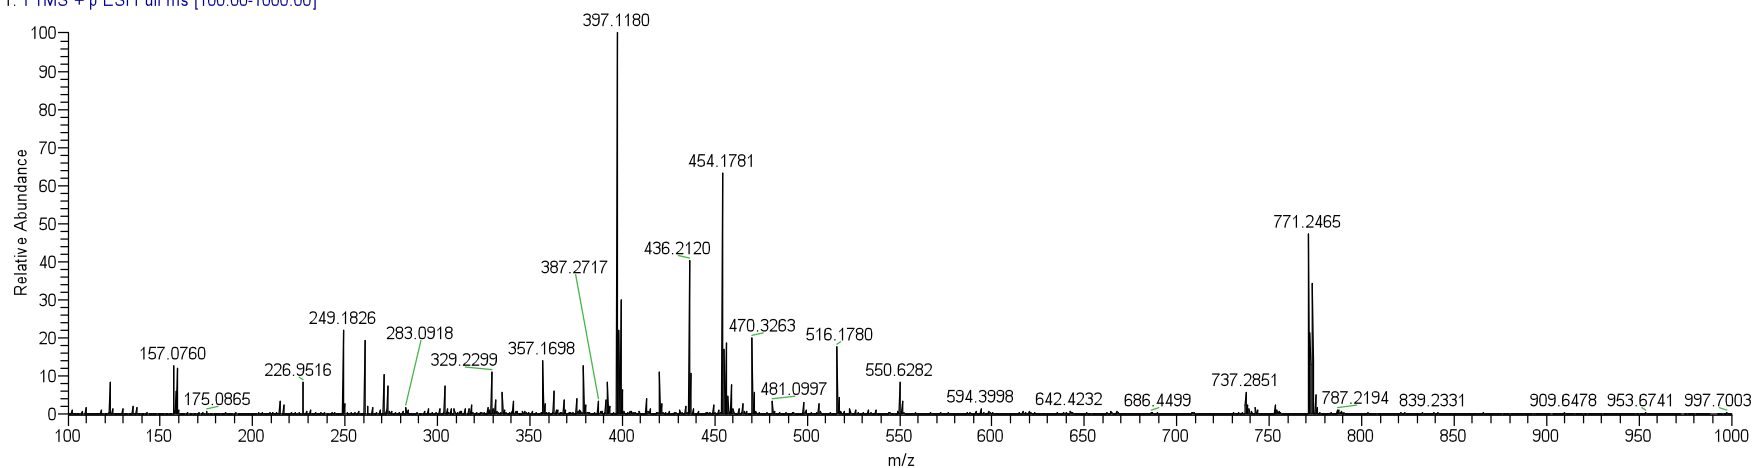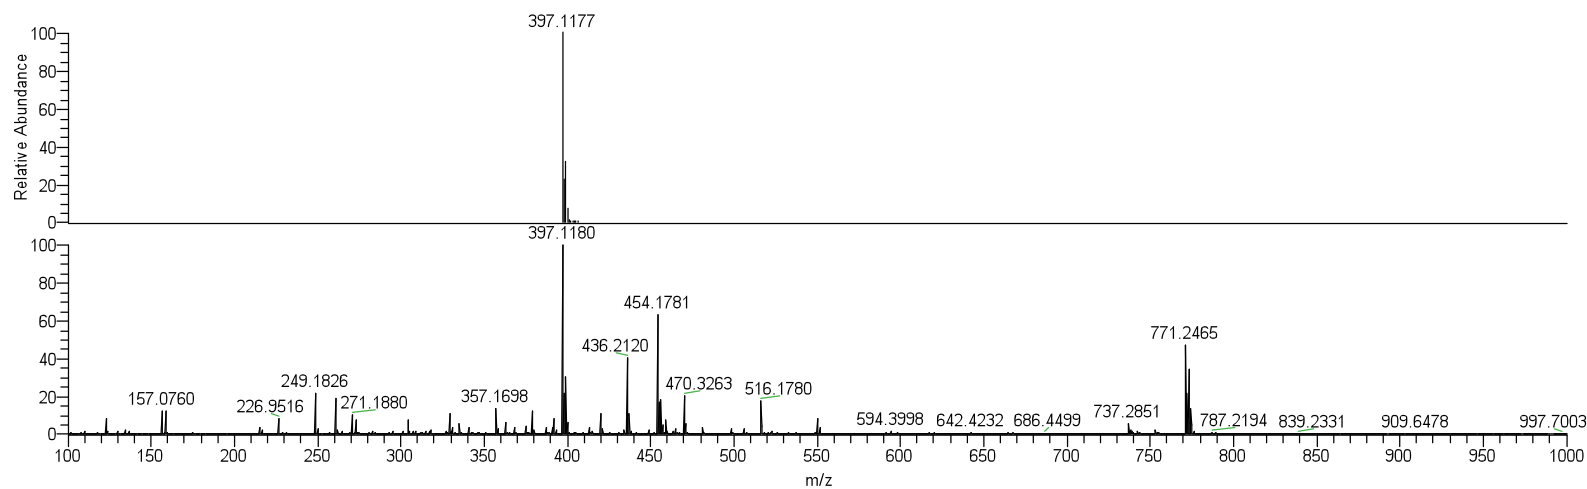

NL:  
5.97E5  
C<sub>21</sub>H<sub>23</sub>O<sub>4</sub>ClNa:  
C<sub>21</sub>H<sub>23</sub>O<sub>4</sub>Cl<sub>1</sub>Na<sub>1</sub>  
pa Chrg 1

NL:  
4.68E6  
RT-5-  
95\_130328104337#3  
RT: 0.03 AV: 1 T:  
FTMS + p ESI Full  
ms [100.00-1000.00]

S16



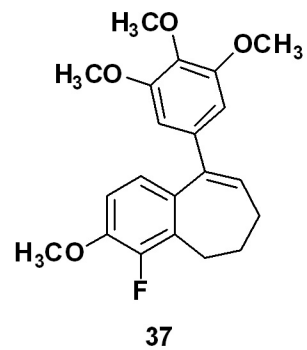

— 7.26  
 { 6.81  
 { 6.79  
 { 6.78  
 { 6.77  
 { 6.47  
 { 6.37  
 { 6.36  
 { 6.34

{ 3.91  
 { 3.86  
 { 3.80

{ 2.75  
 { 2.75  
 { 2.74  
 { 2.73  
 { 2.72  
 { 2.72

{ 2.17  
 { 2.15  
 { 2.14  
 { 1.99  
 { 1.98  
 { 1.96

— 0.00

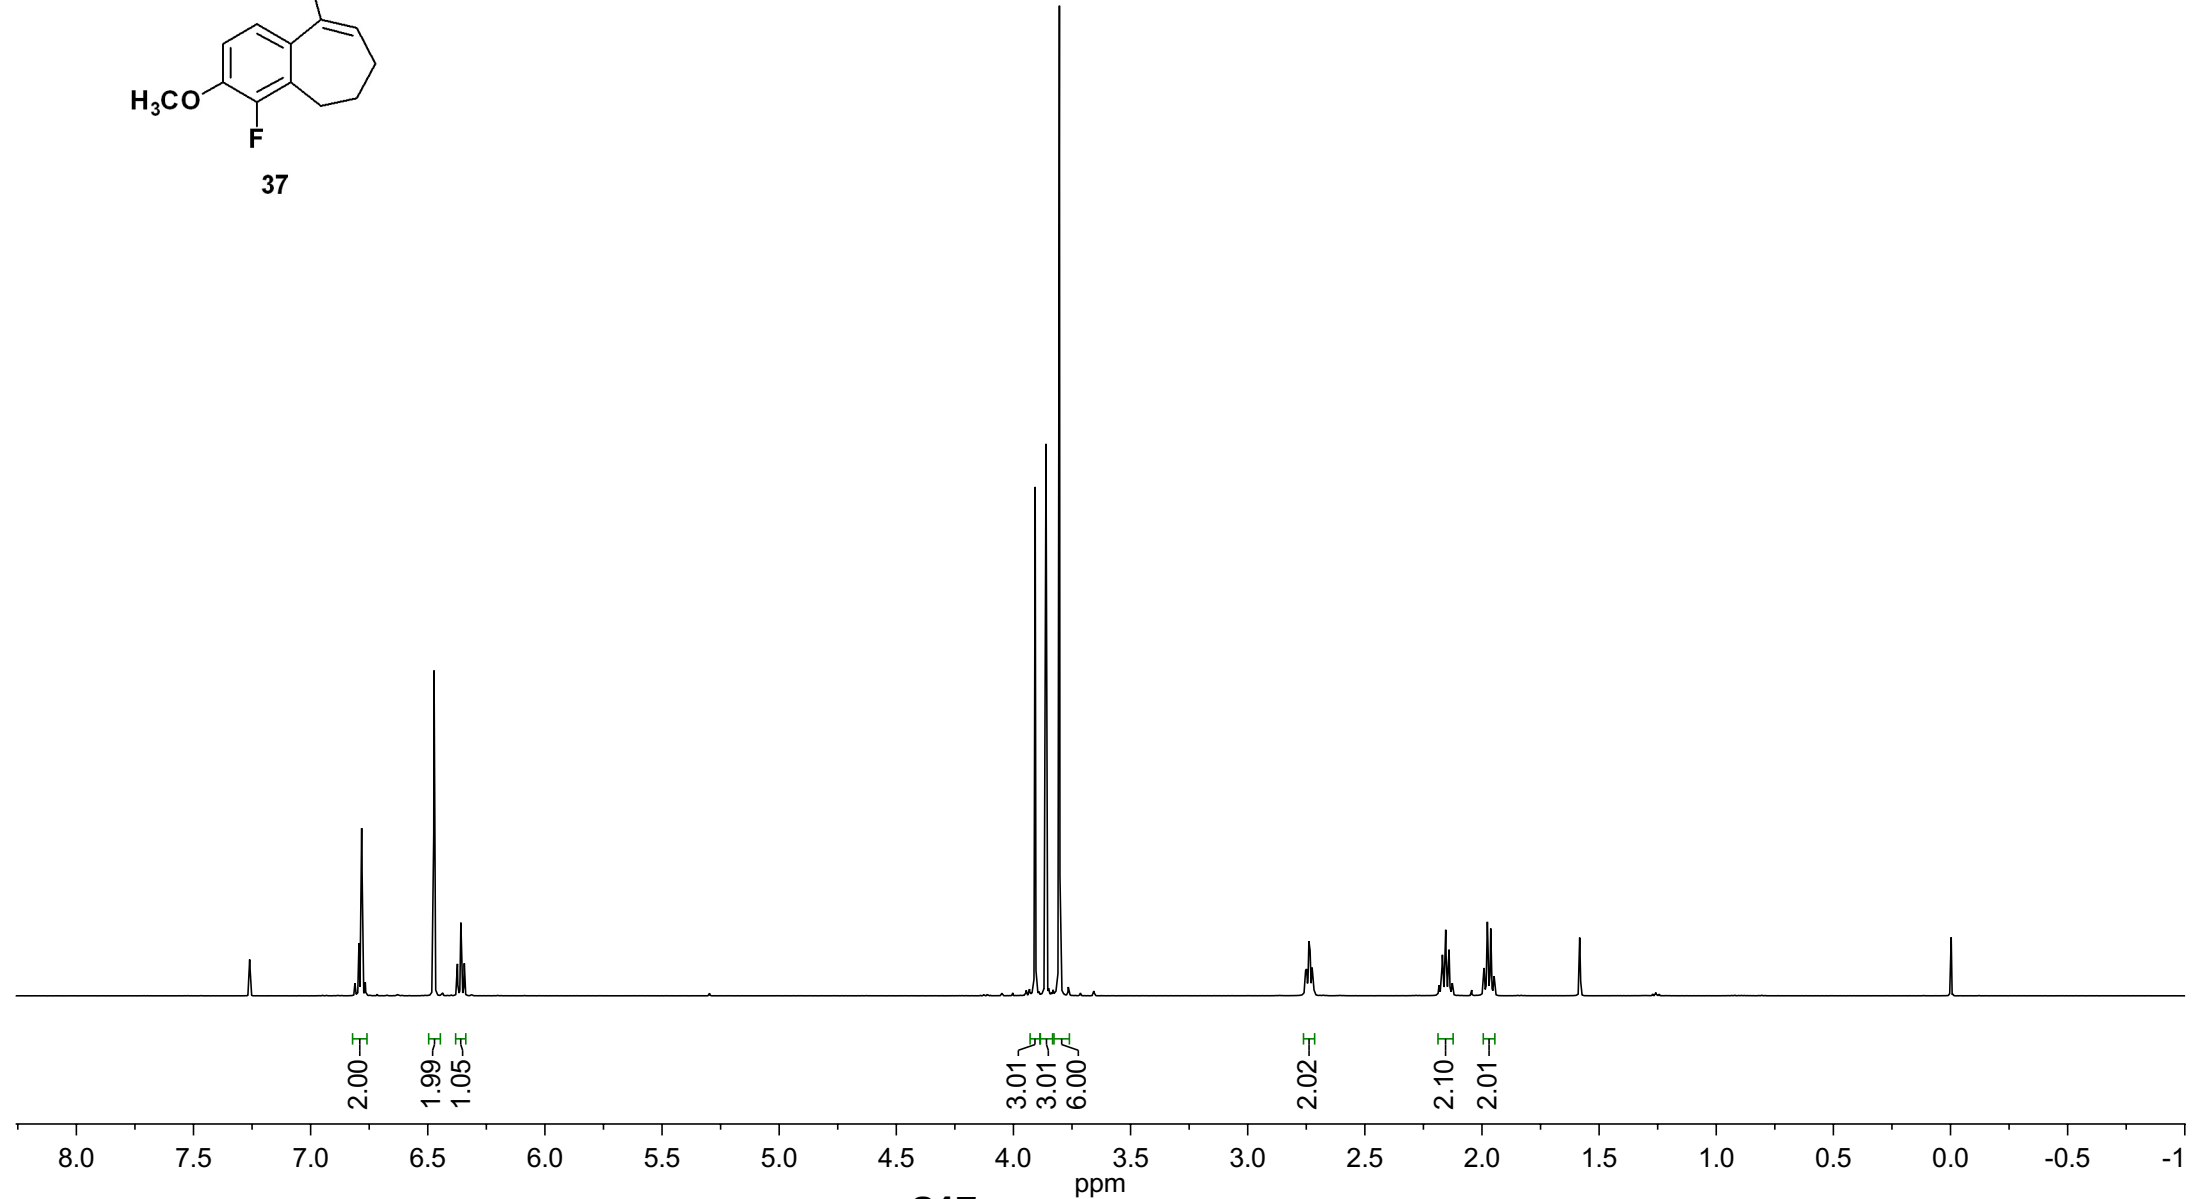

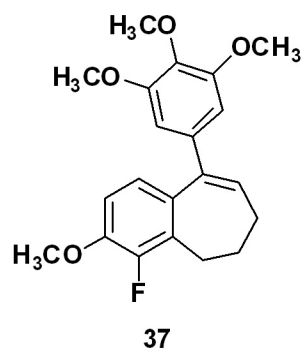

153.04  
 150.69  
 148.77  
 146.49  
 146.40  
 142.25  
 142.23  
 138.12  
 137.55  
 134.05  
 134.03  
 129.75  
 129.64  
 127.77  
 124.89  
 124.86  
 110.13  
 110.12  
 105.31

77.41  
 77.16  
 76.91

61.07  
 56.27

33.76  
 25.65  
 23.30  
 23.27

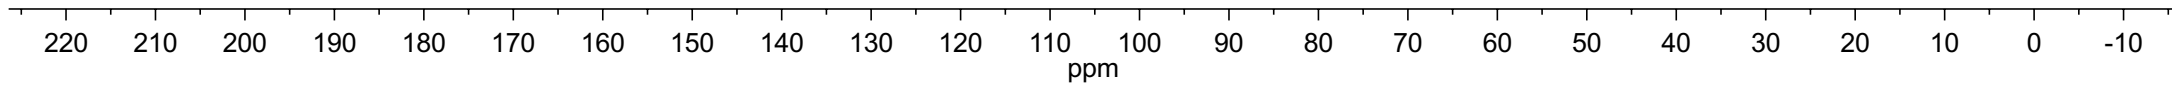

S18

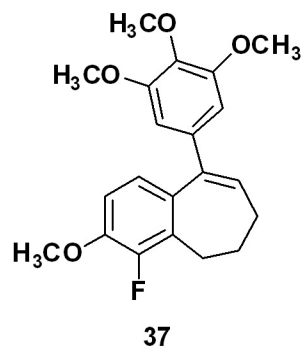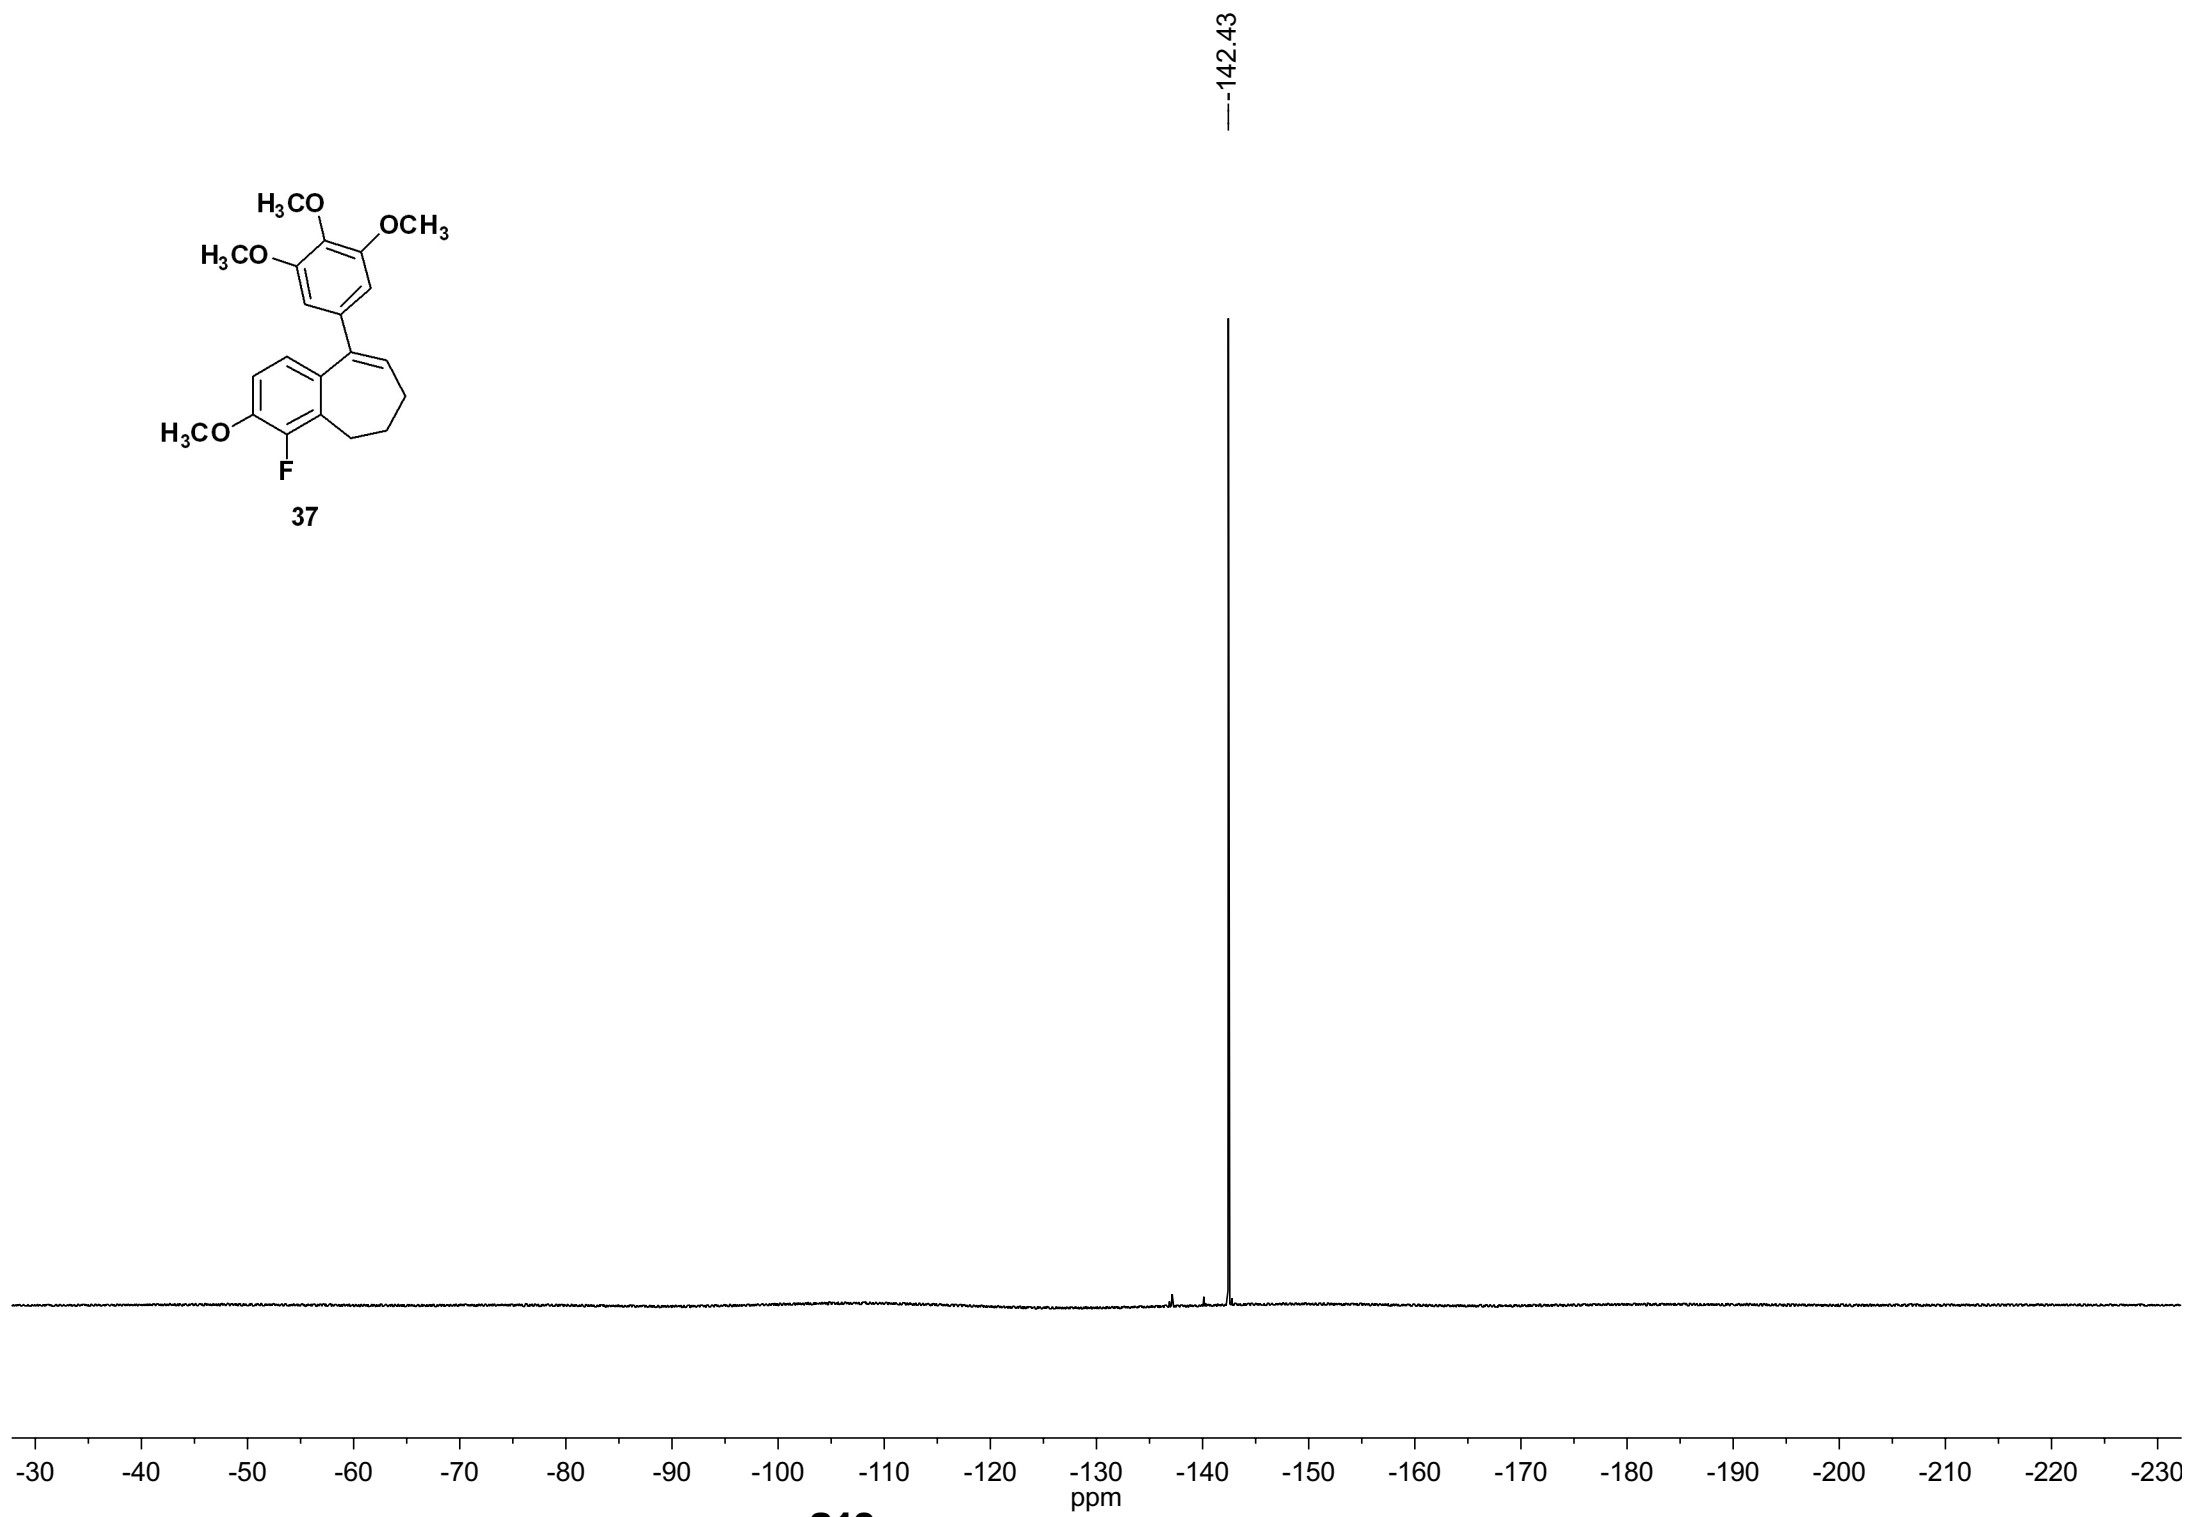

S19

Sample Name: run1

### HPLC Traces of Compound 37

=====

Acq. Operator : Matt Mac  
Acq. Instrument : Instrument 1 Location : -  
Injection Date : 3/12/2013 2:19:35 PM  
Acq. Method : C:\CHEM32\1\METHODS\MASTERMETHOD.M  
Last changed : 3/12/2013 1:52:29 PM by Matt Mac  
Analysis Method : C:\CHEM32\1\DATA\MATT MAC\RT-5-79000010.D\DA.M (MASTERMETHOD.M)  
Last changed : 3/12/2013 3:11:18 PM by Matt Mac

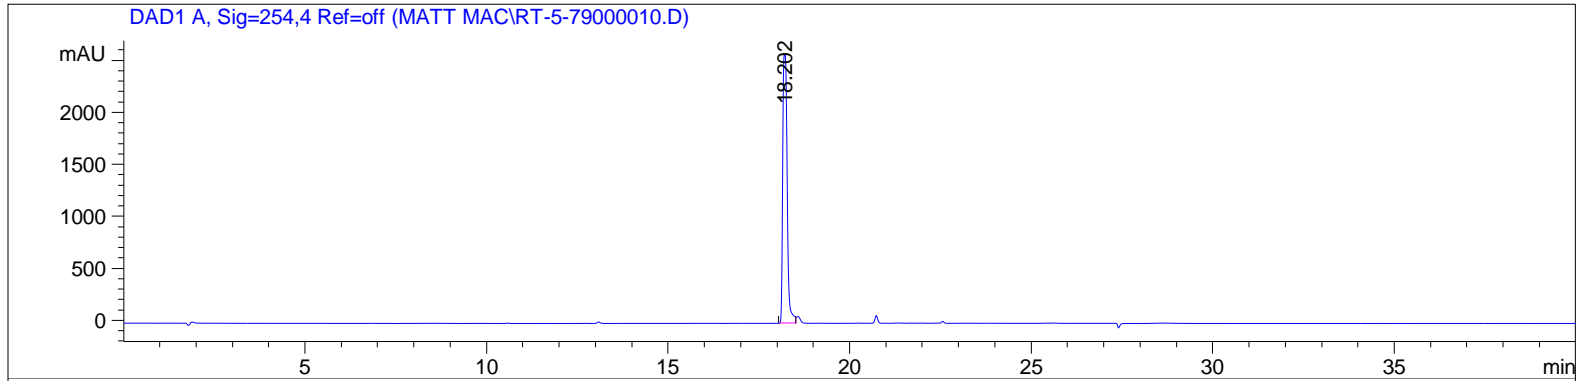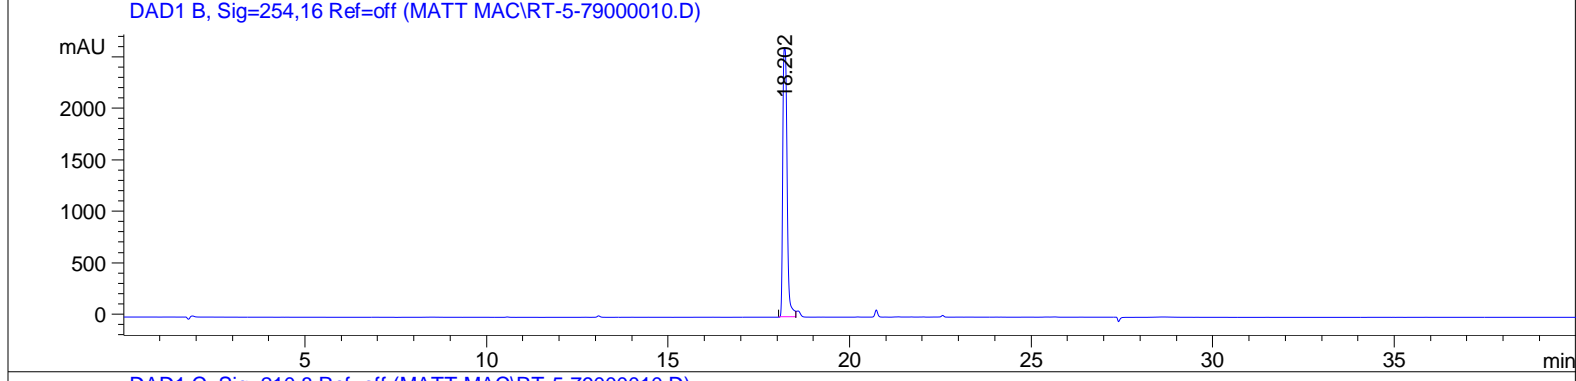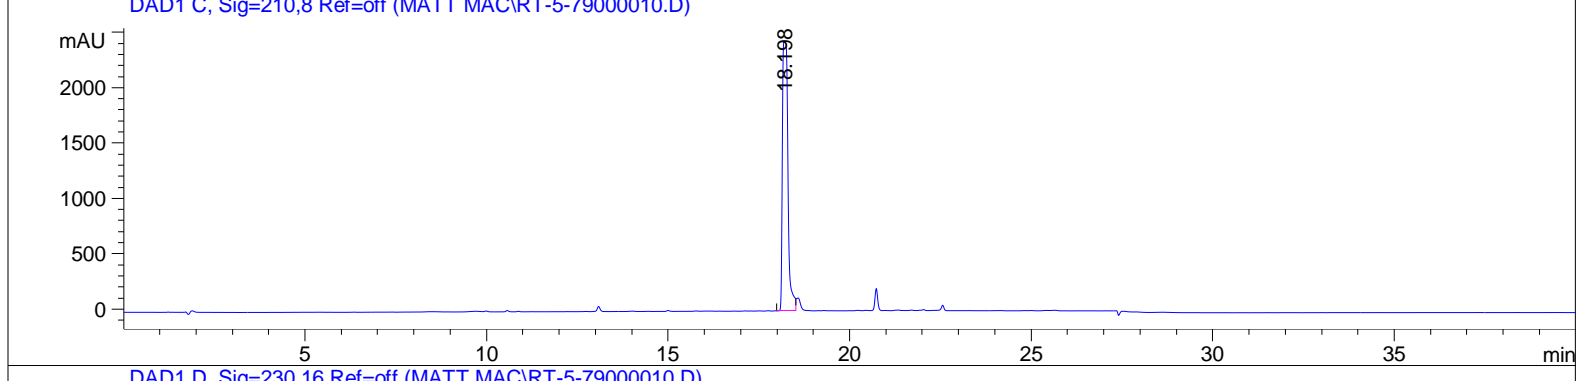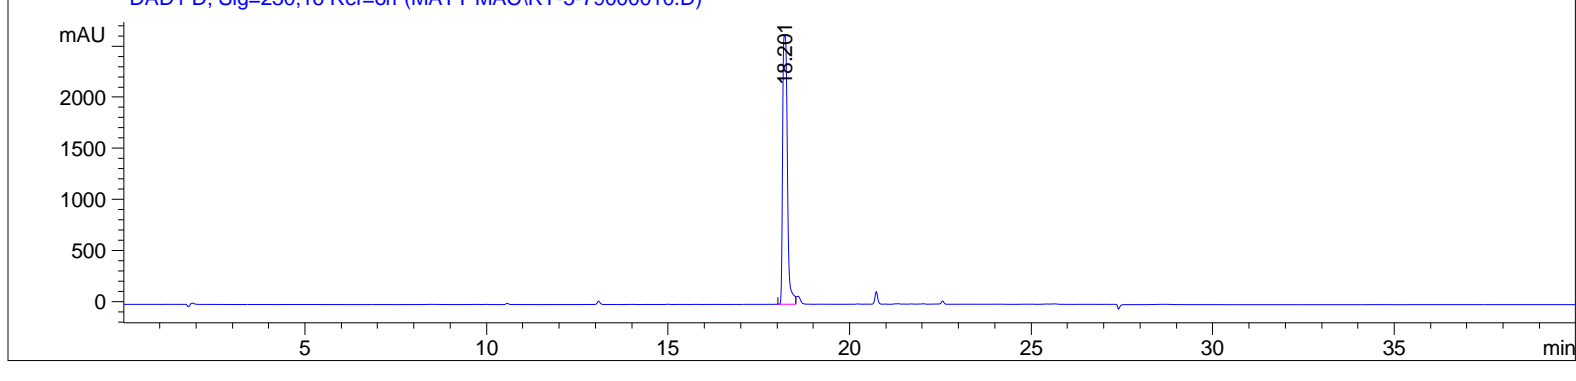

S20

Sample Name: run1

### HPLC Traces of Compound 37

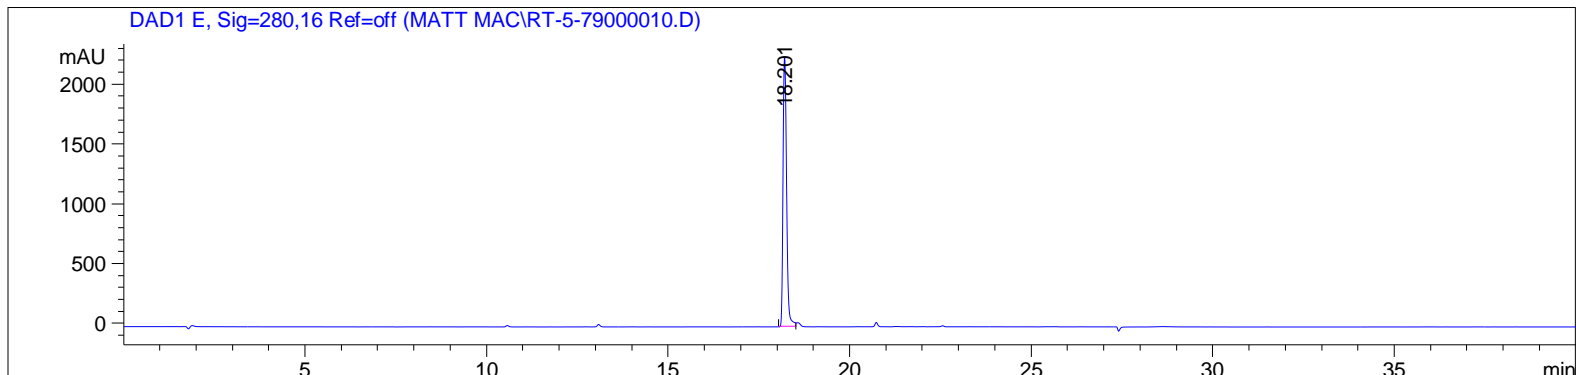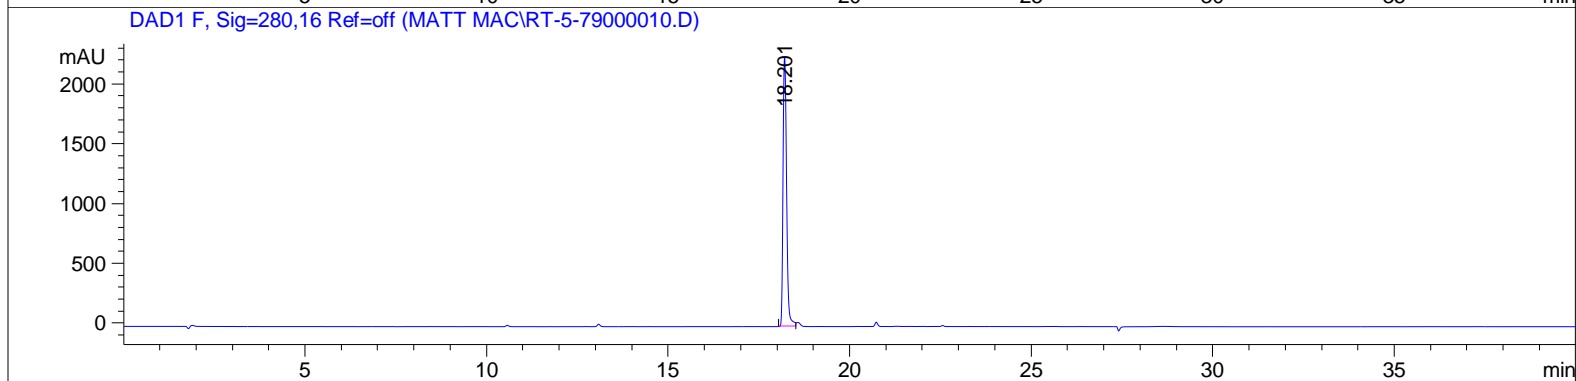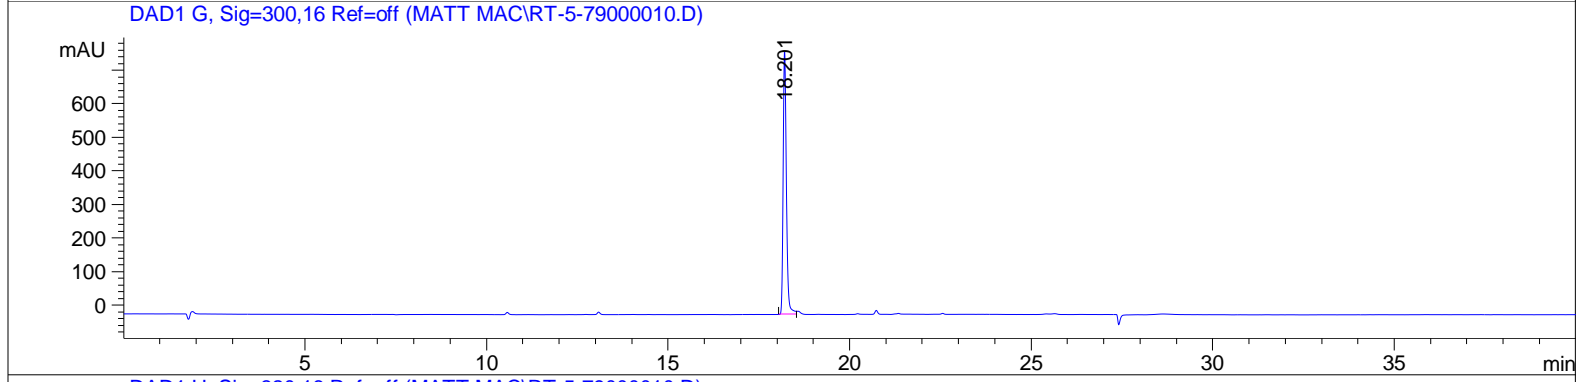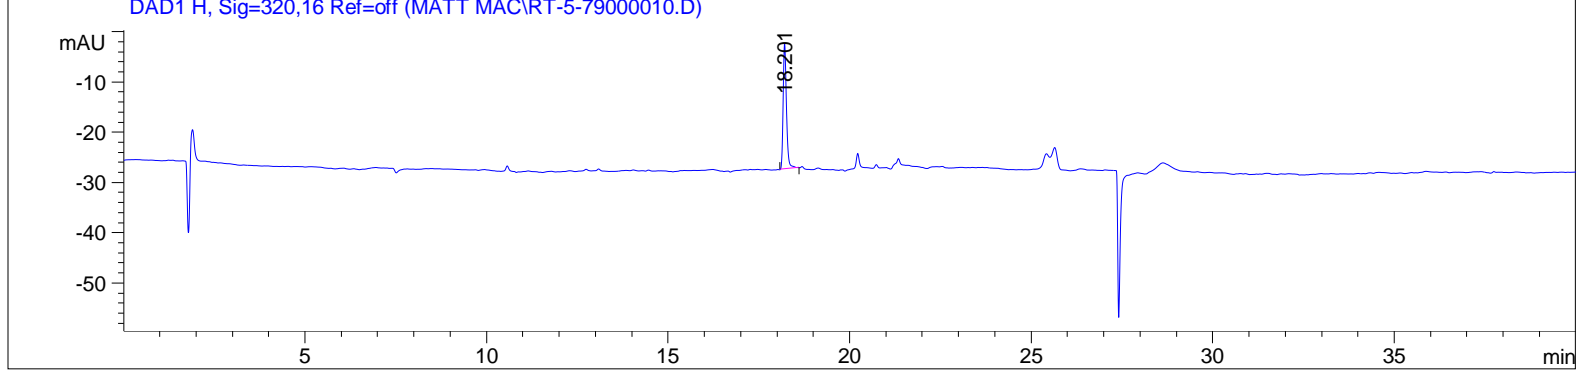

=====  
Area Percent Report  
=====

Sorted By : Signal  
Multiplier : 1.0000  
Dilution : 1.0000  
Use Multiplier & Dilution Factor with ISTDs

**S21**

### HPLC Traces of Compound 37

Signal 1: DAD1 A, Sig=254,4 Ref=off

| Peak # | RetTime [min] | Type | Width [min] | Area [mAU*s] | Height [mAU] | Area %   |
|--------|---------------|------|-------------|--------------|--------------|----------|
| 1      | 18.202        | BV   | 0.1363      | 2.22192e4    | 2585.70190   | 100.0000 |

Totals : 2.22192e4 2585.70190

Signal 2: DAD1 B, Sig=254,16 Ref=off

| Peak # | RetTime [min] | Type | Width [min] | Area [mAU*s] | Height [mAU] | Area %   |
|--------|---------------|------|-------------|--------------|--------------|----------|
| 1      | 18.202        | BV   | 0.1335      | 2.18342e4    | 2612.74072   | 100.0000 |

Totals : 2.18342e4 2612.74072

Signal 3: DAD1 C, Sig=210,8 Ref=off

| Peak # | RetTime [min] | Type | Width [min] | Area [mAU*s] | Height [mAU] | Area %   |
|--------|---------------|------|-------------|--------------|--------------|----------|
| 1      | 18.198        | VV   | 0.1708      | 2.60022e4    | 2429.85010   | 100.0000 |

Totals : 2.60022e4 2429.85010

Signal 4: DAD1 D, Sig=230,16 Ref=off

| Peak # | RetTime [min] | Type | Width [min] | Area [mAU*s] | Height [mAU] | Area %   |
|--------|---------------|------|-------------|--------------|--------------|----------|
| 1      | 18.201        | VV   | 0.1463      | 2.39506e4    | 2628.60571   | 100.0000 |

Totals : 2.39506e4 2628.60571

Signal 5: DAD1 E, Sig=280,16 Ref=off

| Peak # | RetTime [min] | Type | Width [min] | Area [mAU*s] | Height [mAU] | Area %   |
|--------|---------------|------|-------------|--------------|--------------|----------|
| 1      | 18.201        | BV   | 0.1087      | 1.55833e4    | 2253.99902   | 100.0000 |

Totals : 1.55833e4 2253.99902

**S22**

### HPLC Traces of Compound 37

Signal 6: DAD1 F, Sig=280,16 Ref=off

| Peak # | RetTime [min] | Type | Width [min] | Area [mAU*s] | Height [mAU] | Area %   |
|--------|---------------|------|-------------|--------------|--------------|----------|
| 1      | 18.201        | BV   | 0.1087      | 1.55833e4    | 2253.99902   | 100.0000 |

Totals : 1.55833e4 2253.99902

Signal 7: DAD1 G, Sig=300,16 Ref=off

| Peak # | RetTime [min] | Type | Width [min] | Area [mAU*s] | Height [mAU] | Area %   |
|--------|---------------|------|-------------|--------------|--------------|----------|
| 1      | 18.201        | BV   | 0.0966      | 4897.43213   | 786.51733    | 100.0000 |

Totals : 4897.43213 786.51733

Signal 8: DAD1 H, Sig=320,16 Ref=off

| Peak # | RetTime [min] | Type | Width [min] | Area [mAU*s] | Height [mAU] | Area %   |
|--------|---------------|------|-------------|--------------|--------------|----------|
| 1      | 18.201        | BB   | 0.0987      | 159.84872    | 24.96538     | 100.0000 |

Totals : 159.84872 24.96538

=====  
\*\*\* End of Report \*\*\*

# HRMS of Compound 37

C:\Xcalibur\...RT-5-79\_130327190029

3/27/2013 7:00:29 PM

RT-5-79

RT-5-79\_130327190029 #8 RT: 0.06 AV: 1 NL: 9.64E7  
T: FTMS + p ESI Full ms [150.00-1000.00]

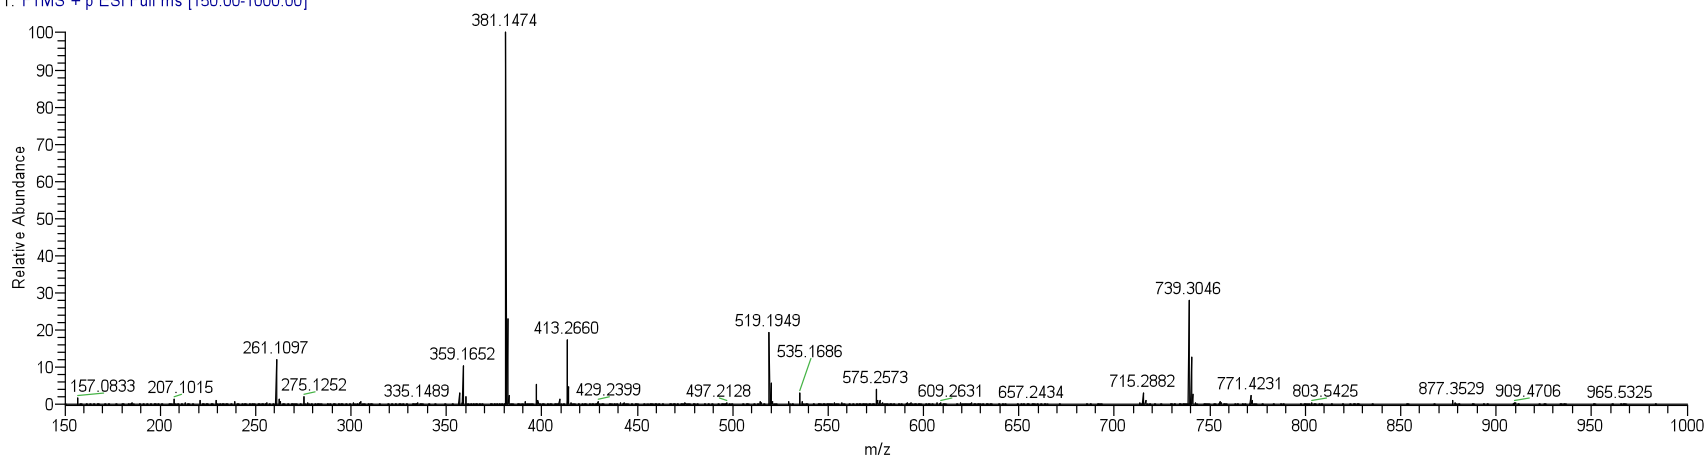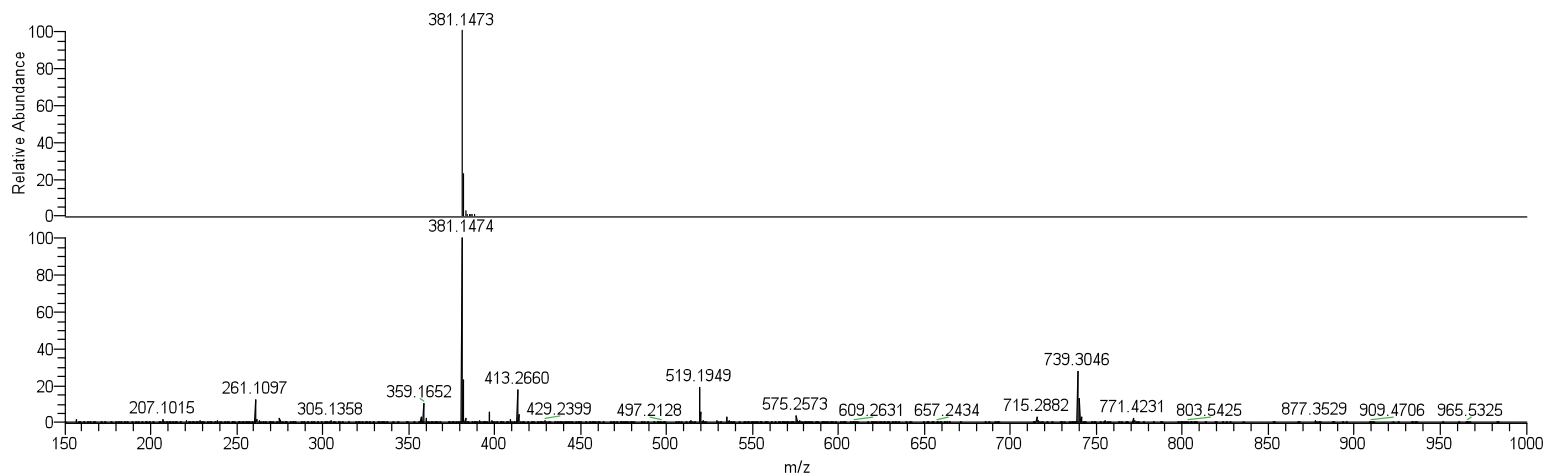

NL:  
7.88E5  
C21H23O4FNa  
C21H23O4F1Na1  
pa Chrg 1

NL:  
9.64E7  
RT-5-  
79\_130327190029#8  
RT: 0.06 AV: 1 T:  
FTMS + p ESI Full  
ms [150.00-1000.00]



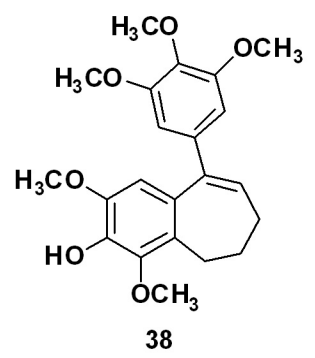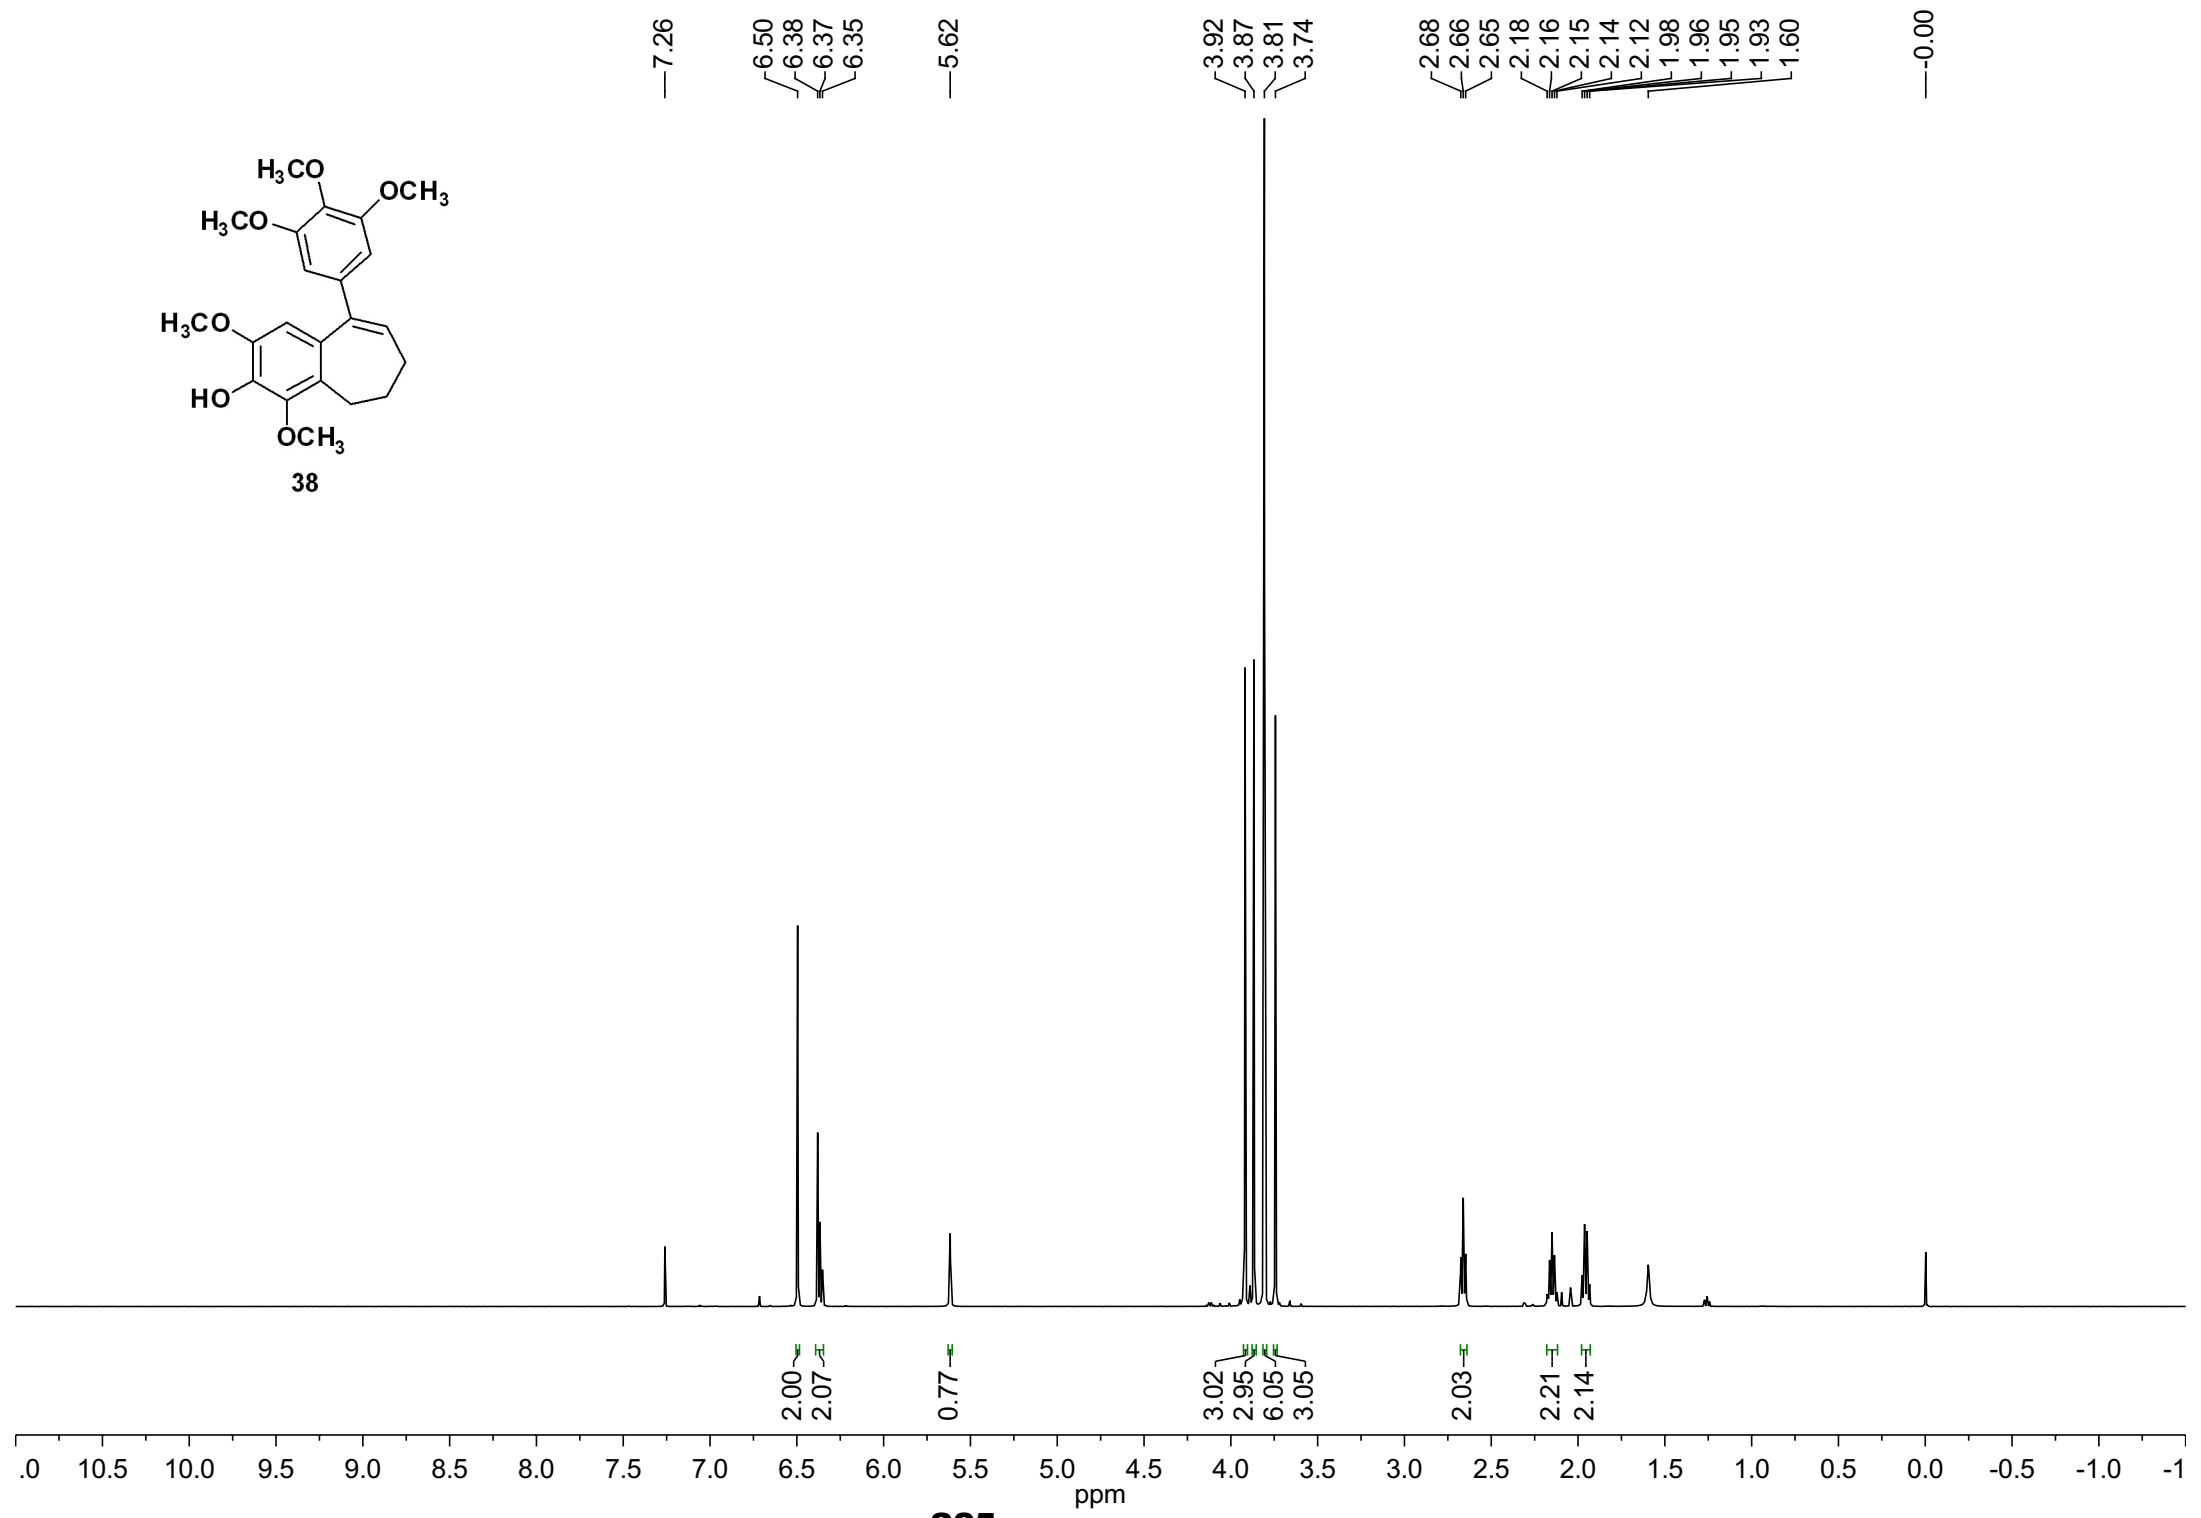

S25

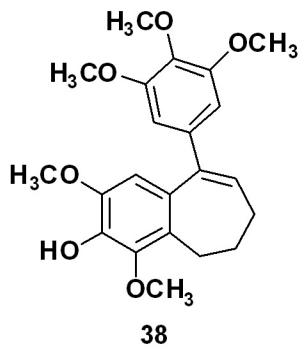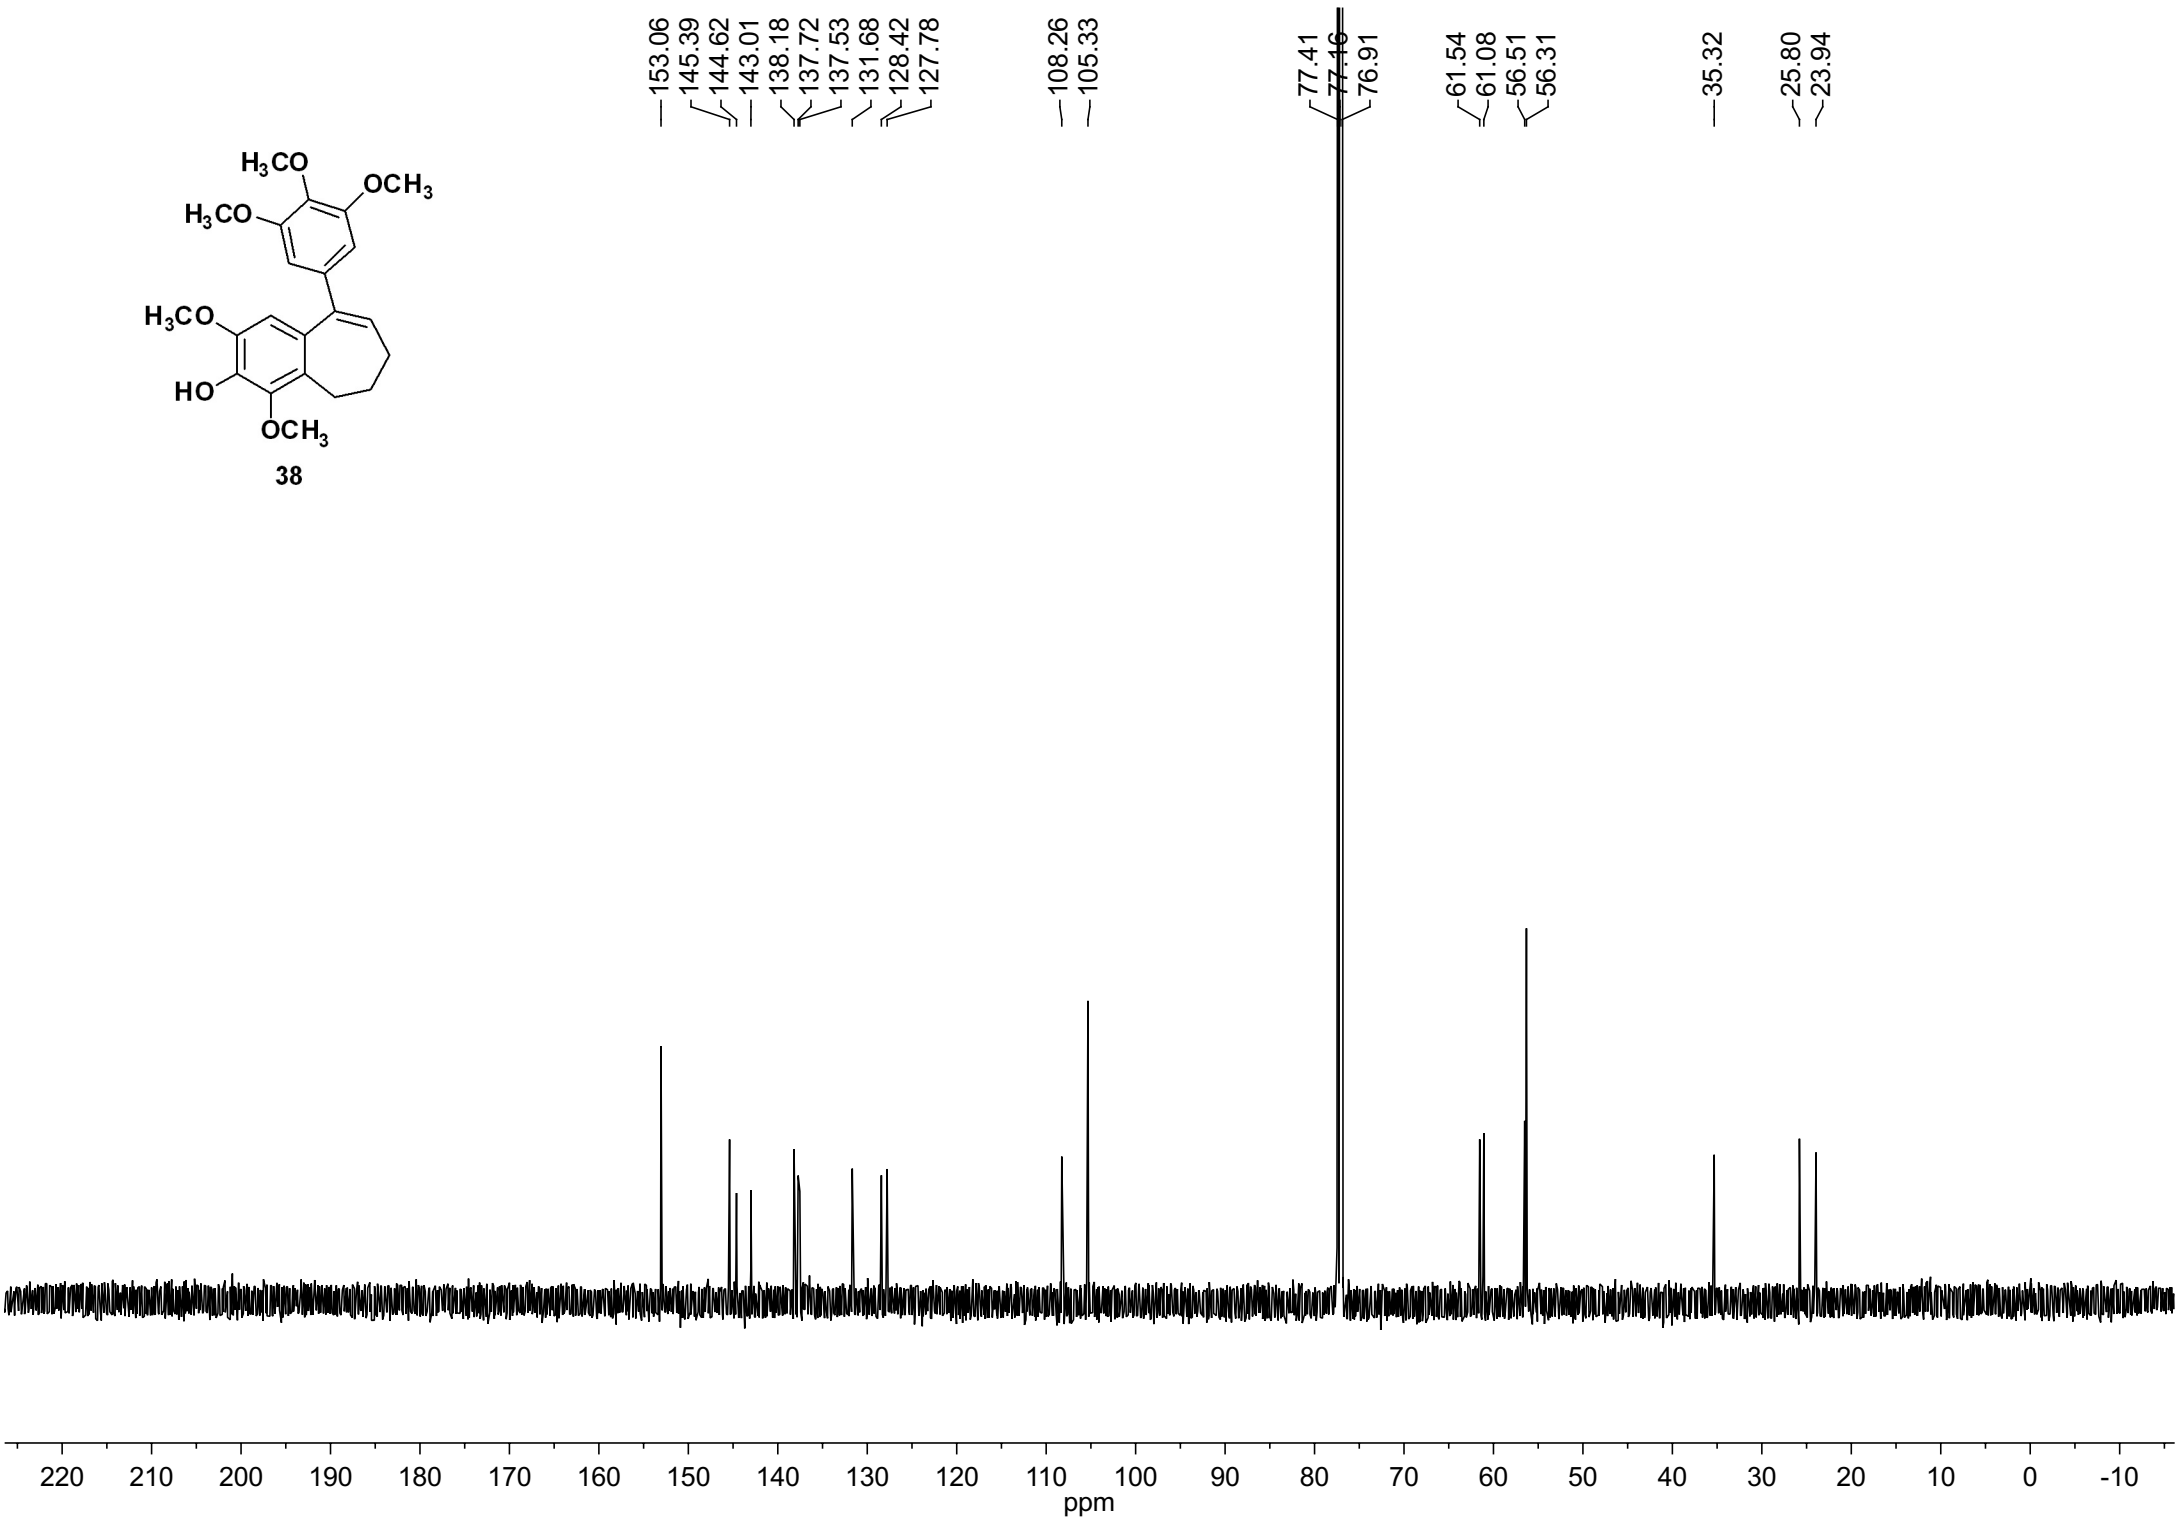

Sample Name: run1

**HPLC Traces of Compound 38**

=====  
Acq. Operator : Christine  
Acq. Instrument : Instrument 1 Location : -  
Injection Date : 3/26/2013 11:12:23 AM  
Acq. Method : C:\CHEM32\1\METHODS\MASTERMETHOD.M  
Last changed : 3/26/2013 11:10:20 AM by Christine  
Analysis Method : C:\CHEM32\1\DATA\CHRISTINE\RT\_4\_142000013.D\DA.M (MASTERMETHOD.M)  
Last changed : 3/28/2013 10:58:21 AM by Christine

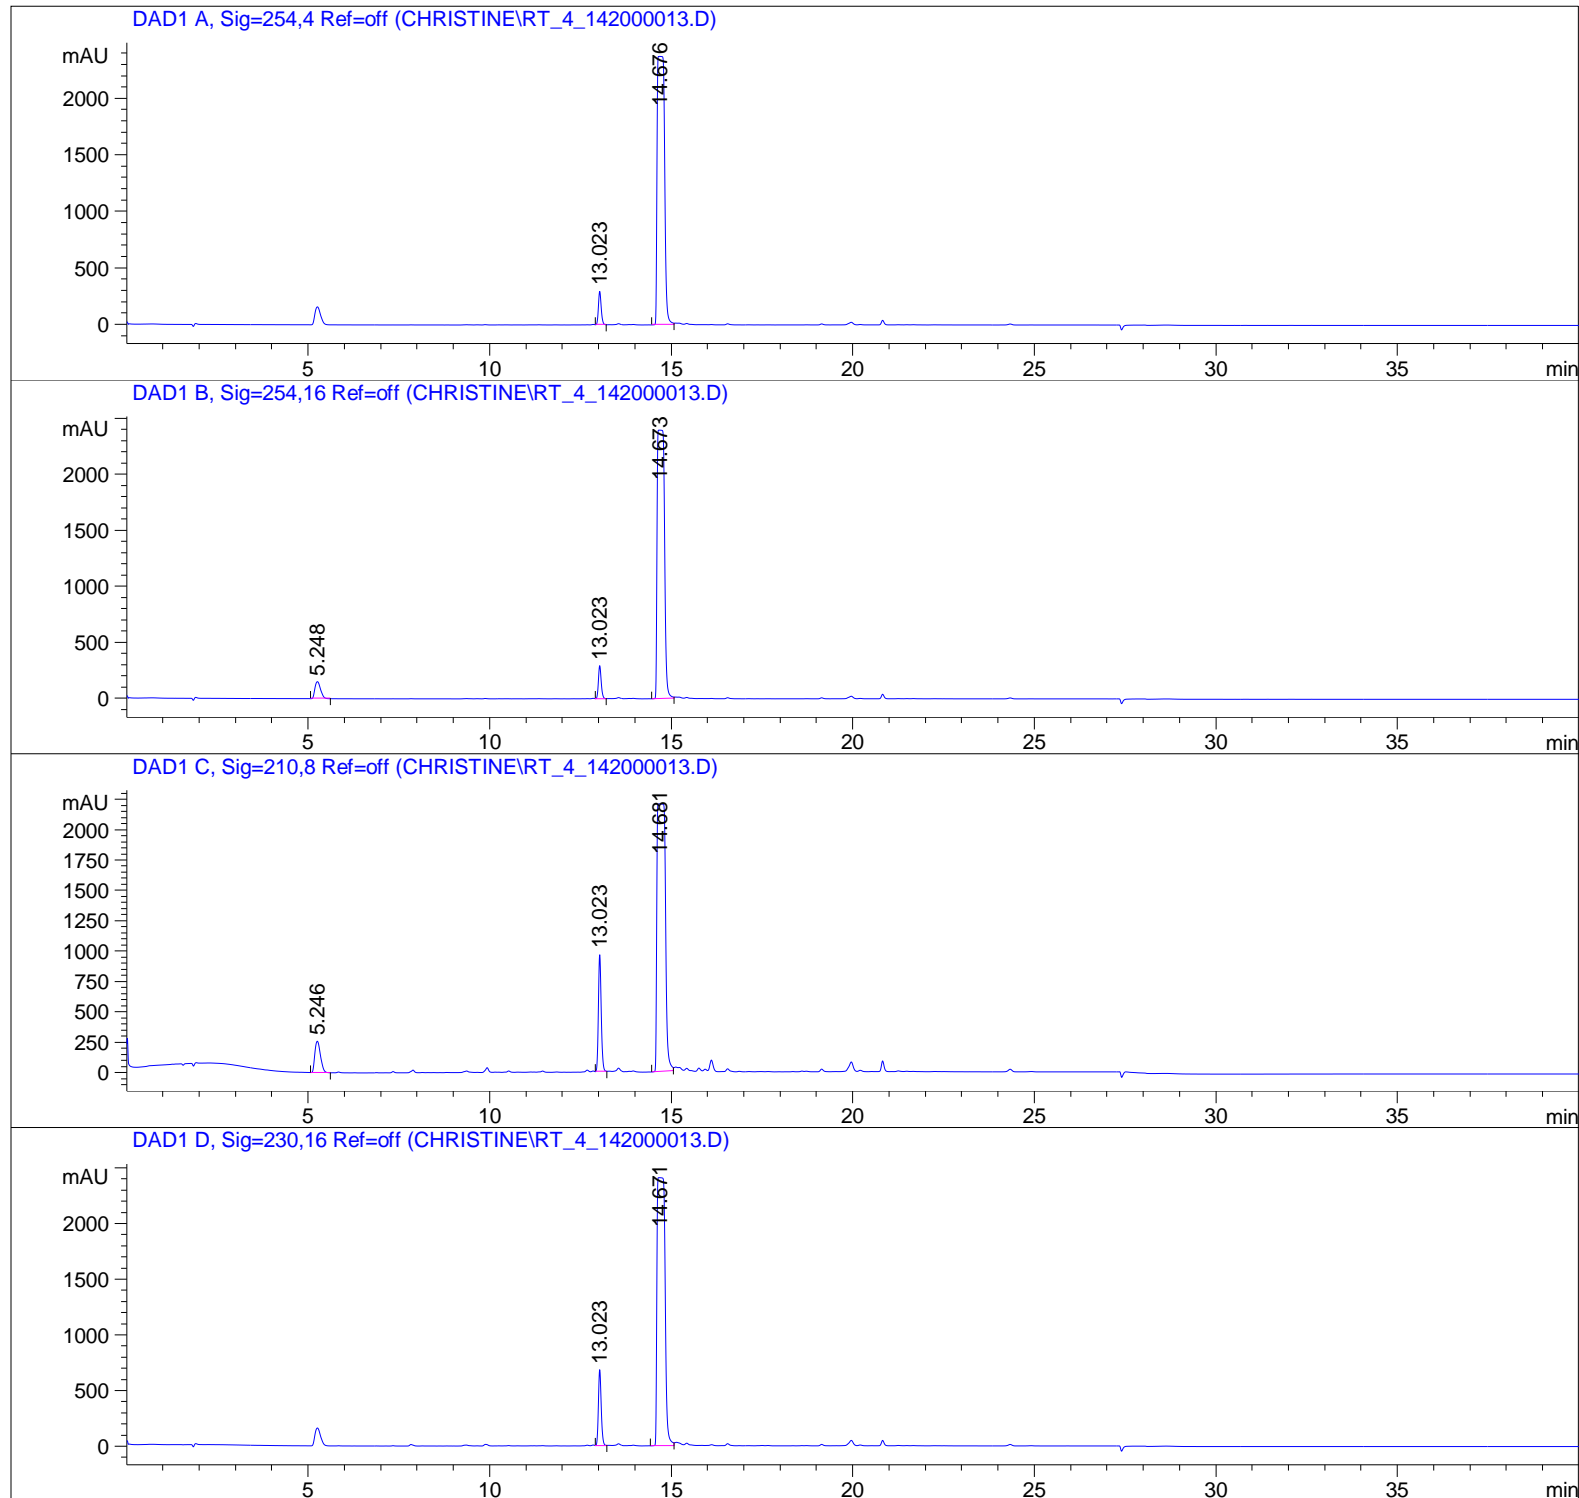**S27**

Sample Name: run1

**HPLC Traces of Compound 38**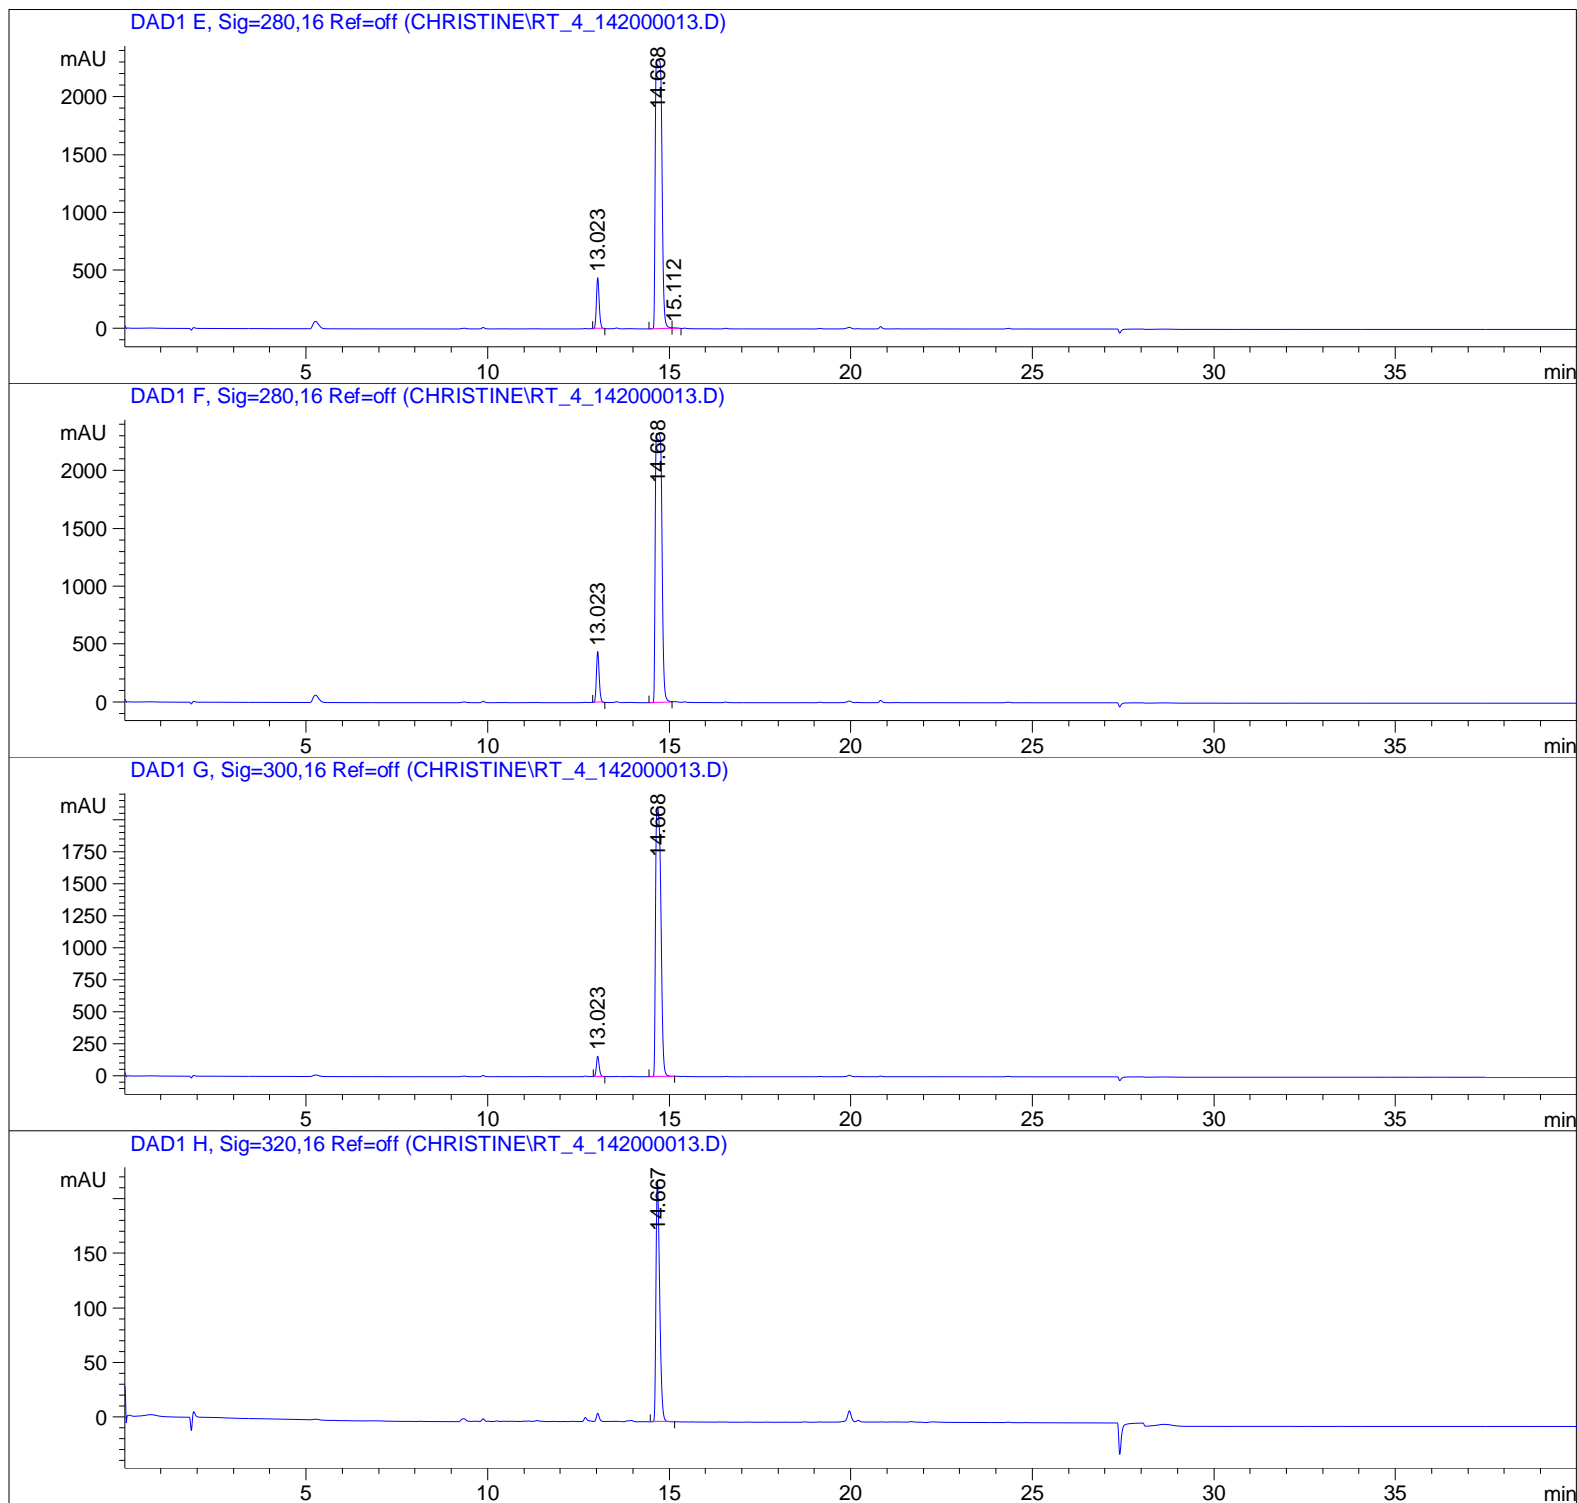=====  
Area Percent Report  
=====

Sorted By : Signal  
Multiplier : 1.0000  
Dilution : 1.0000  
Use Multiplier & Dilution Factor with ISTDs

**S28**

Sample Name: run1

**HPLC Traces of Compound 38**

Signal 1: DAD1 A, Sig=254,4 Ref=off

| Peak # | RetTime [min] | Type | Width [min] | Area [mAU*s] | Height [mAU] | Area %  |
|--------|---------------|------|-------------|--------------|--------------|---------|
| 1      | 13.023        | VV   | 0.0826      | 1588.48059   | 295.92328    | 4.6146  |
| 2      | 14.676        | BV   | 0.1873      | 3.28346e4    | 2374.24194   | 95.3854 |

Totals : 3.44231e4 2670.16522

Signal 2: DAD1 B, Sig=254,16 Ref=off

| Peak # | RetTime [min] | Type | Width [min] | Area [mAU*s] | Height [mAU] | Area %  |
|--------|---------------|------|-------------|--------------|--------------|---------|
| 1      | 5.248         | BB   | 0.1724      | 1645.22827   | 151.87173    | 4.5733  |
| 2      | 13.023        | VV   | 0.0826      | 1585.70972   | 295.34805    | 4.4079  |
| 3      | 14.673        | BV   | 0.1853      | 3.27437e4    | 2397.76465   | 91.0189 |

Totals : 3.59747e4 2844.98444

Signal 3: DAD1 C, Sig=210,8 Ref=off

| Peak # | RetTime [min] | Type | Width [min] | Area [mAU*s] | Height [mAU] | Area %  |
|--------|---------------|------|-------------|--------------|--------------|---------|
| 1      | 5.246         | BB   | 0.1716      | 2778.12891   | 257.99753    | 6.5013  |
| 2      | 13.023        | VV   | 0.0830      | 5218.32080   | 965.62964    | 12.2118 |
| 3      | 14.681        | BV   | 0.2001      | 3.47355e4    | 2201.03906   | 81.2870 |

Totals : 4.27320e4 3424.66623

Signal 4: DAD1 D, Sig=230,16 Ref=off

| Peak # | RetTime [min] | Type | Width [min] | Area [mAU*s] | Height [mAU] | Area %  |
|--------|---------------|------|-------------|--------------|--------------|---------|
| 1      | 13.023        | VV   | 0.0832      | 3700.61694   | 683.55157    | 9.3330  |
| 2      | 14.671        | BV   | 0.2042      | 3.59502e4    | 2407.02783   | 90.6670 |

Totals : 3.96508e4 3090.57941

**S29**

Sample Name: run1

### HPLC Traces of Compound 38

Signal 5: DAD1 E, Sig=280,16 Ref=off

| Peak # | RetTime [min] | Type | Width [min] | Area [mAU*s] | Height [mAU] | Area %  |
|--------|---------------|------|-------------|--------------|--------------|---------|
| 1      | 13.023        | VV   | 0.0826      | 2372.75391   | 441.98782    | 7.5918  |
| 2      | 14.668        | BV   | 0.2024      | 2.87855e4    | 2326.19653   | 92.1016 |
| 3      | 15.112        | VV   | 0.1450      | 95.81713     | 8.66321      | 0.3066  |

Totals : 3.12541e4 2776.84757

Signal 6: DAD1 F, Sig=280,16 Ref=off

| Peak # | RetTime [min] | Type | Width [min] | Area [mAU*s] | Height [mAU] | Area %  |
|--------|---------------|------|-------------|--------------|--------------|---------|
| 1      | 13.023        | VV   | 0.0826      | 2372.75391   | 441.98782    | 7.6152  |
| 2      | 14.668        | BV   | 0.2024      | 2.87855e4    | 2326.19653   | 92.3848 |

Totals : 3.11583e4 2768.18436

Signal 7: DAD1 G, Sig=300,16 Ref=off

| Peak # | RetTime [min] | Type | Width [min] | Area [mAU*s] | Height [mAU] | Area %  |
|--------|---------------|------|-------------|--------------|--------------|---------|
| 1      | 13.023        | VB   | 0.0826      | 854.14435    | 159.29744    | 3.8653  |
| 2      | 14.668        | BV   | 0.1678      | 2.12436e4    | 2104.45508   | 96.1347 |

Totals : 2.20978e4 2263.75252

Signal 8: DAD1 H, Sig=320,16 Ref=off

| Peak # | RetTime [min] | Type | Width [min] | Area [mAU*s] | Height [mAU] | Area %   |
|--------|---------------|------|-------------|--------------|--------------|----------|
| 1      | 14.667        | BB   | 0.1103      | 1556.79431   | 220.70790    | 100.0000 |

Totals : 1556.79431 220.70790

\*\*\* End of Report \*\*\*

**S30**

# HRMS of Compound 38

C:\Xcalibur\...RT-4-142\_130328110759

3/28/2013 11:08:00 AM

RT-4-142

RT-4-142\_130328110759 #9 RT: 0.08 AV: 1 NL: 1.34E7  
T: FTMS + p ESI Full ms [100.00-1000.00]

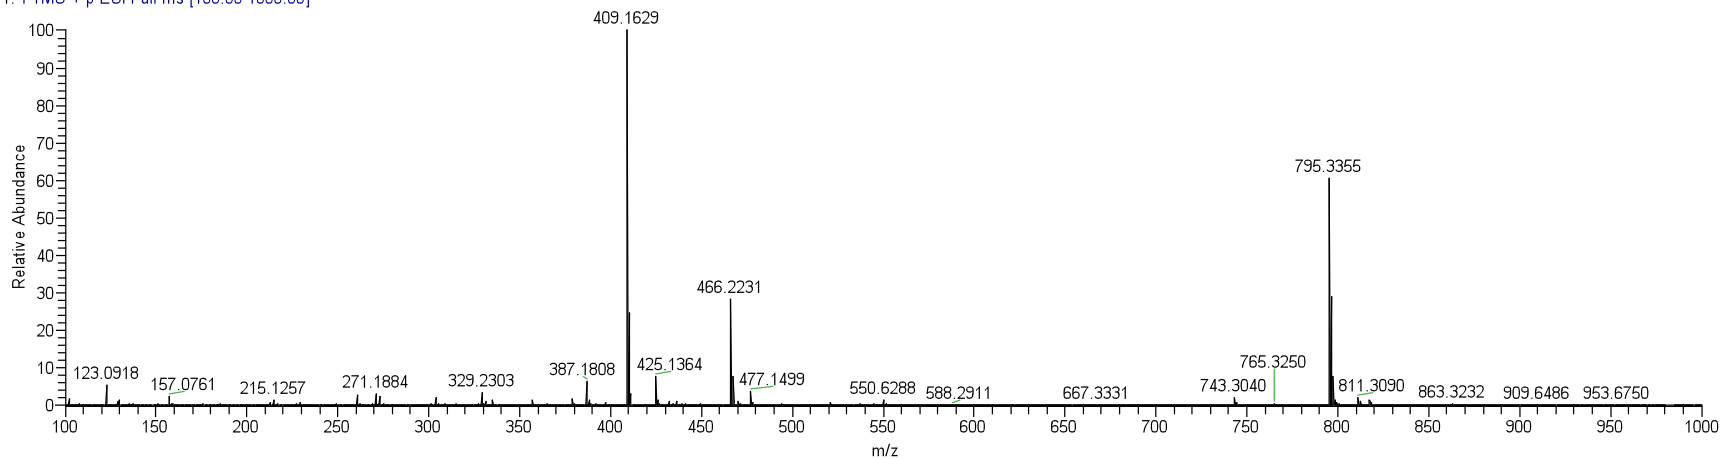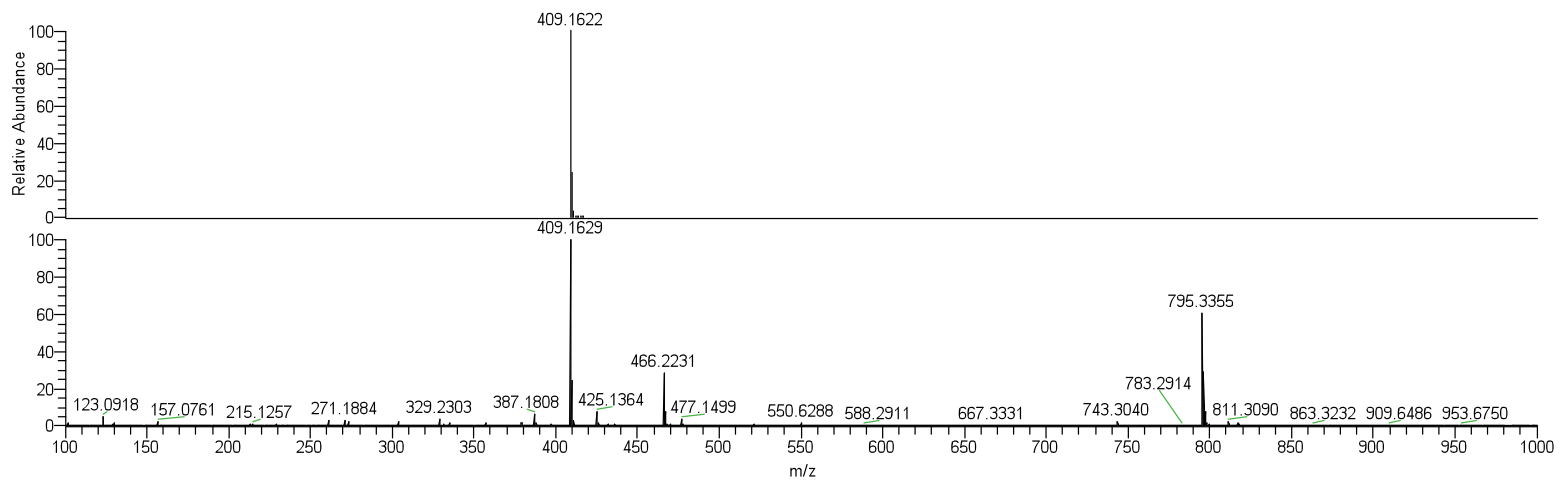

NL:  
7.75E5  
C<sub>22</sub>H<sub>26</sub>O<sub>6</sub>Na:  
C<sub>22</sub>H<sub>26</sub>O<sub>6</sub>Na<sub>1</sub>  
pa Chrg 1

NL:  
1.34E7  
RT-4-  
142\_130328110759#9  
RT: 0.08 AV: 1 T:  
FTMS + p ESI Full  
ms [100.00-1000.00]

S31

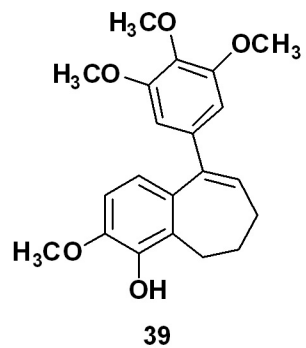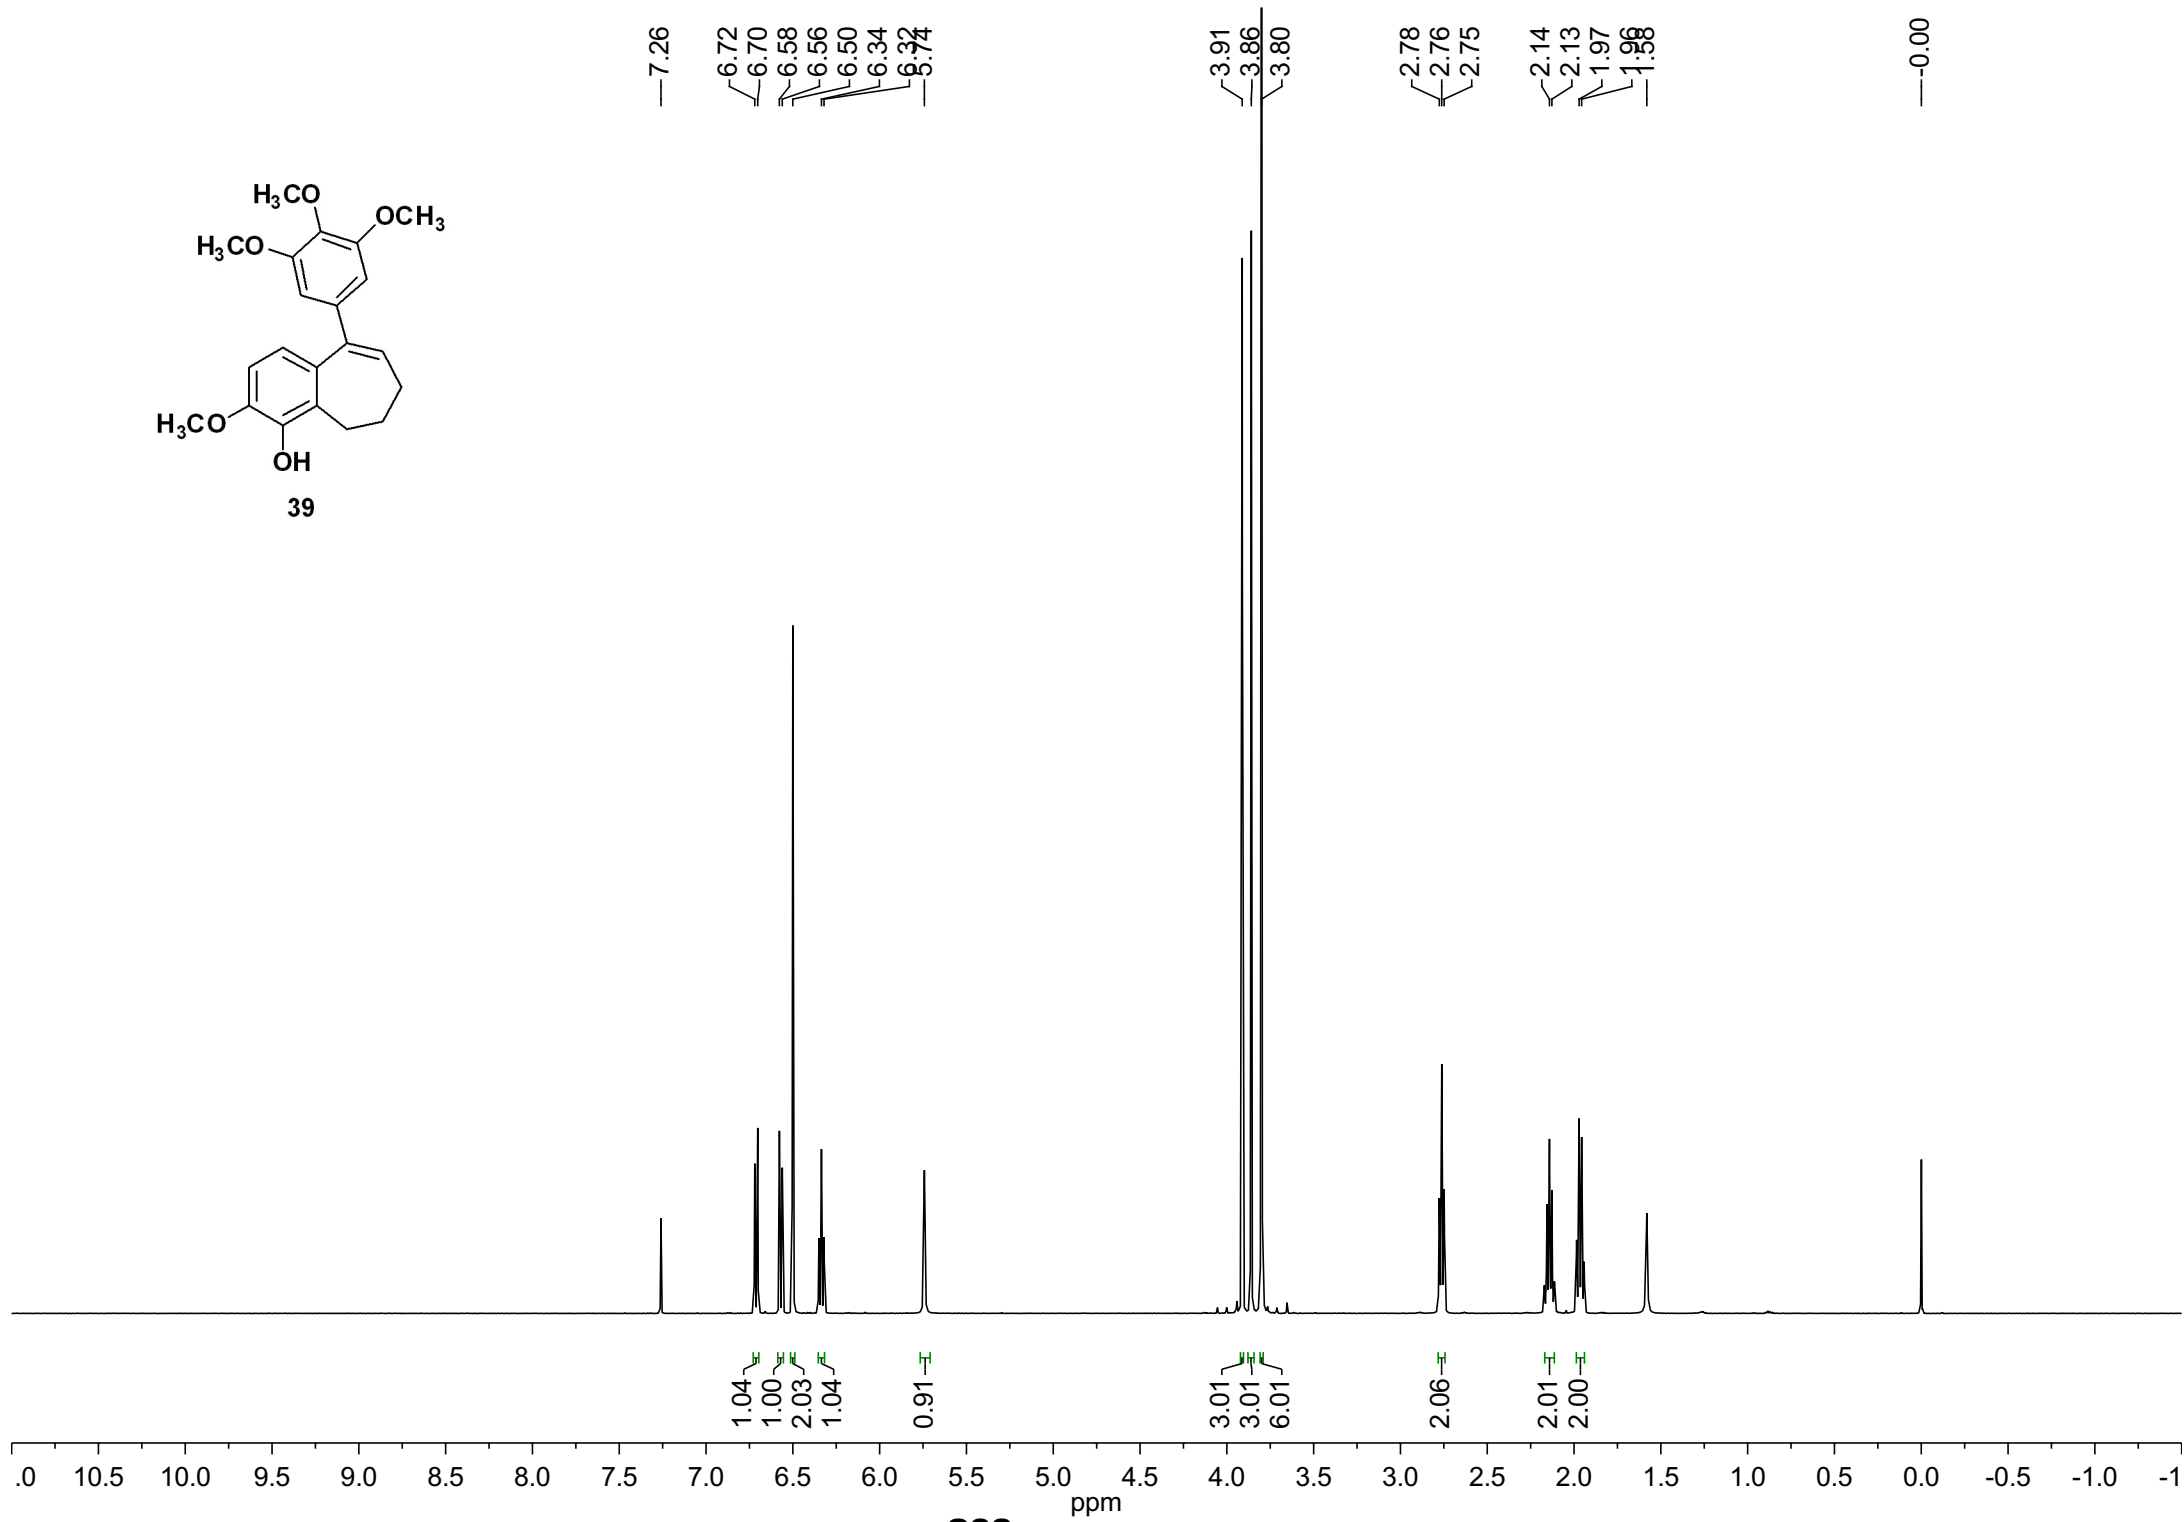



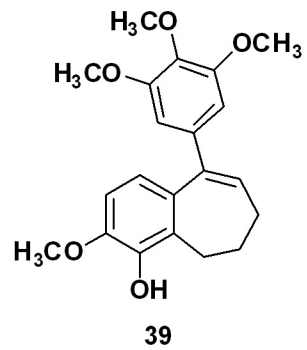

- 152.95
- 145.19
- 142.91
- 142.45
- 138.60
- 137.43
- 134.36
- 127.89
- 127.34
- 120.96
- 107.79
- 105.42
- 77.41
- 77.16
- 76.91
- 61.05
- 56.26
- 56.08
- 33.73
- 25.84
- 23.68

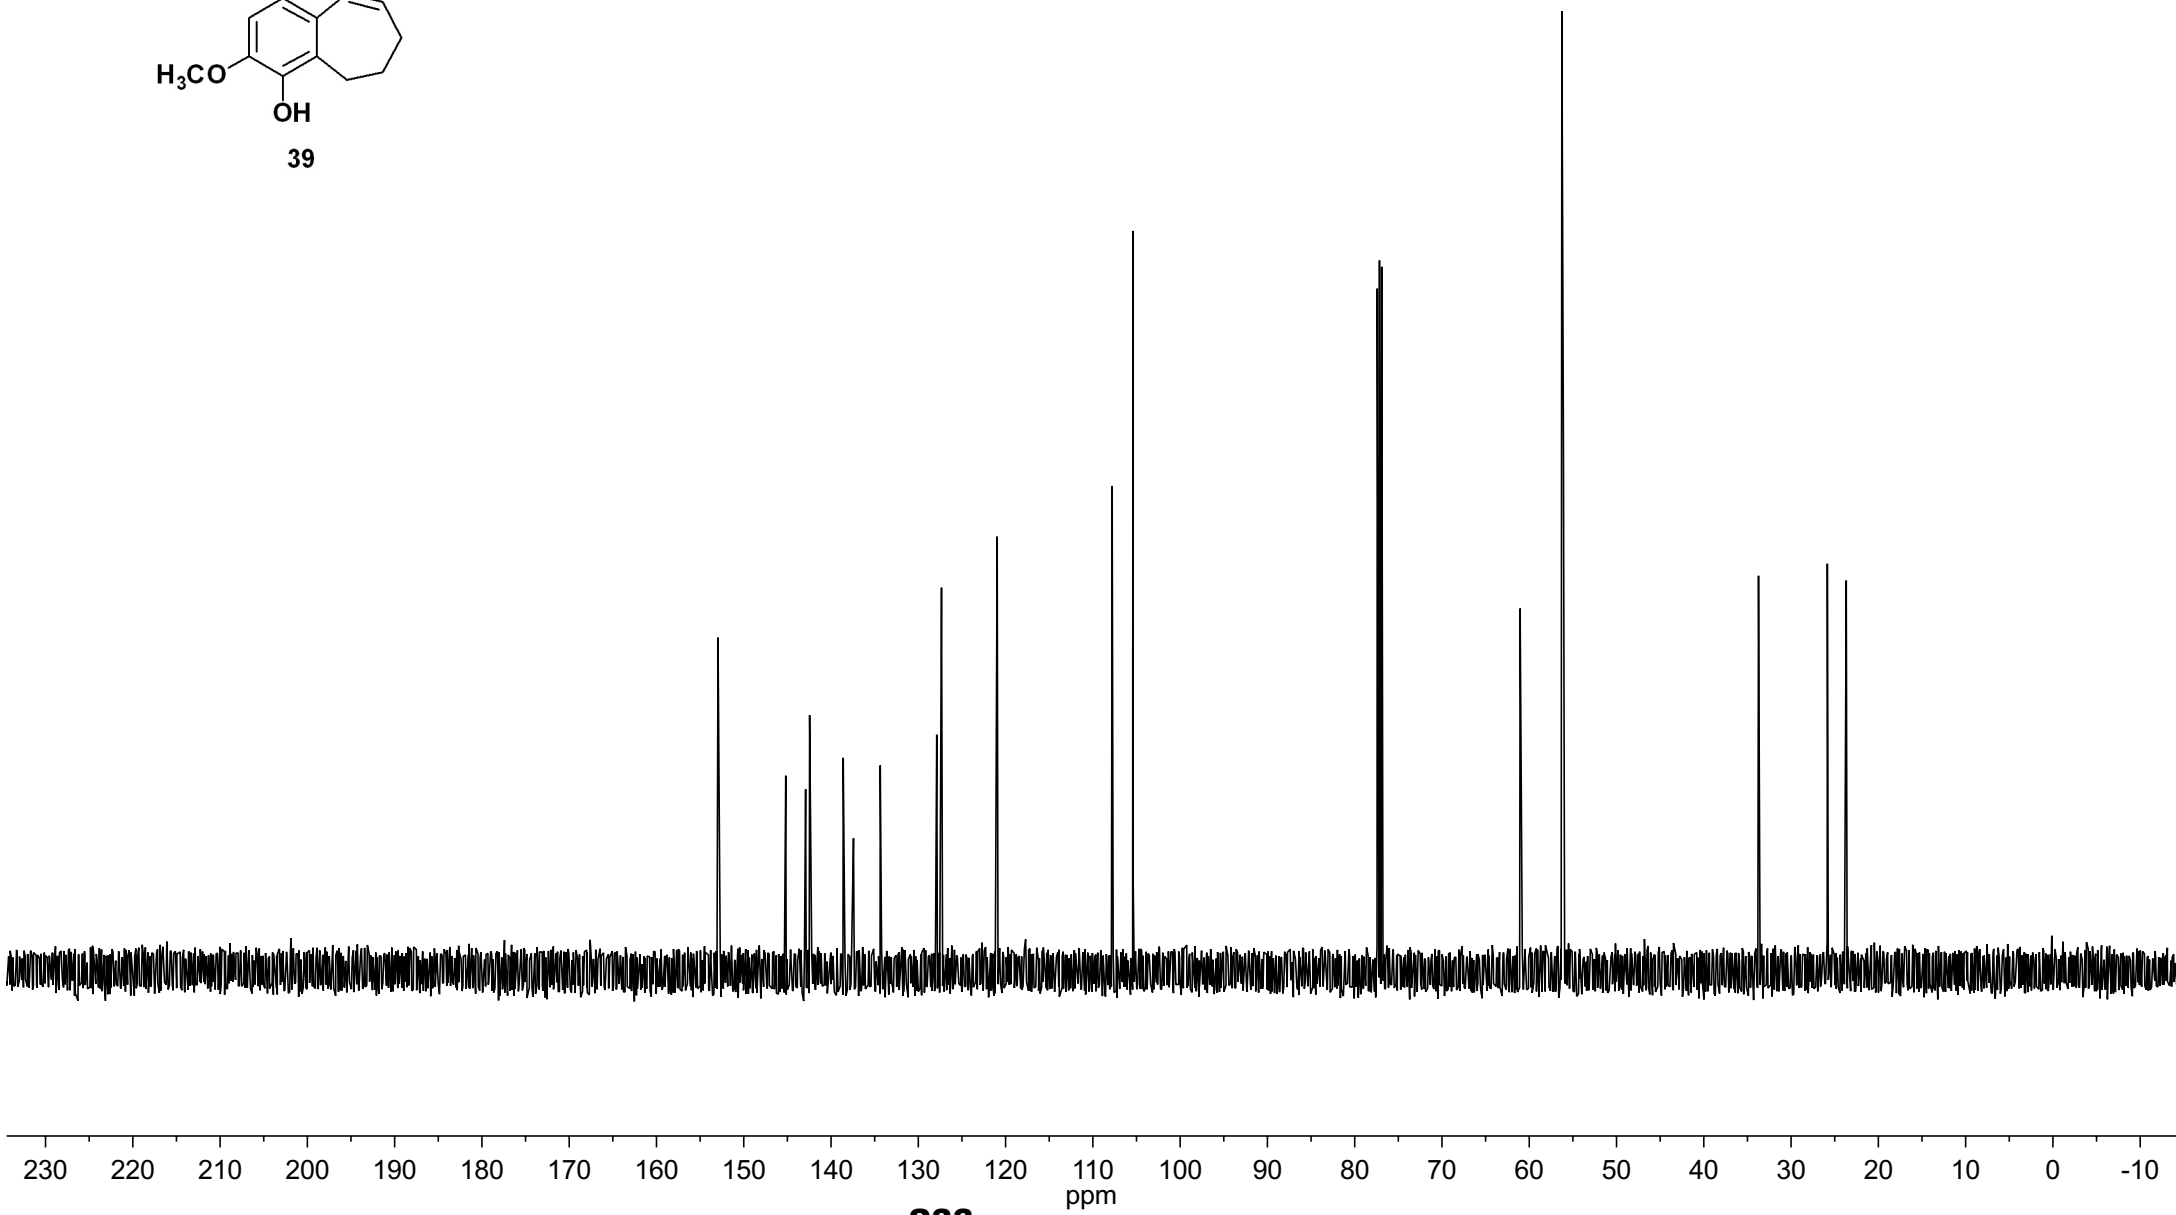

S33

Sample Name: RT-4-131-B

**HPLC Traces of Compound 39**

```

=====
Acq. Operator   : RajT.
Acq. Instrument : Instrument 1
Injection Date  : 5/1/2012 3:16:53 AM
Method         : C:\CHEM32\1\METHODS\MASTERMETHOD.M
Last changed   : 3/28/2012 11:50:33 AM by Erica P
Sample Info    : RT-4-131-B
                10 uL
=====

```

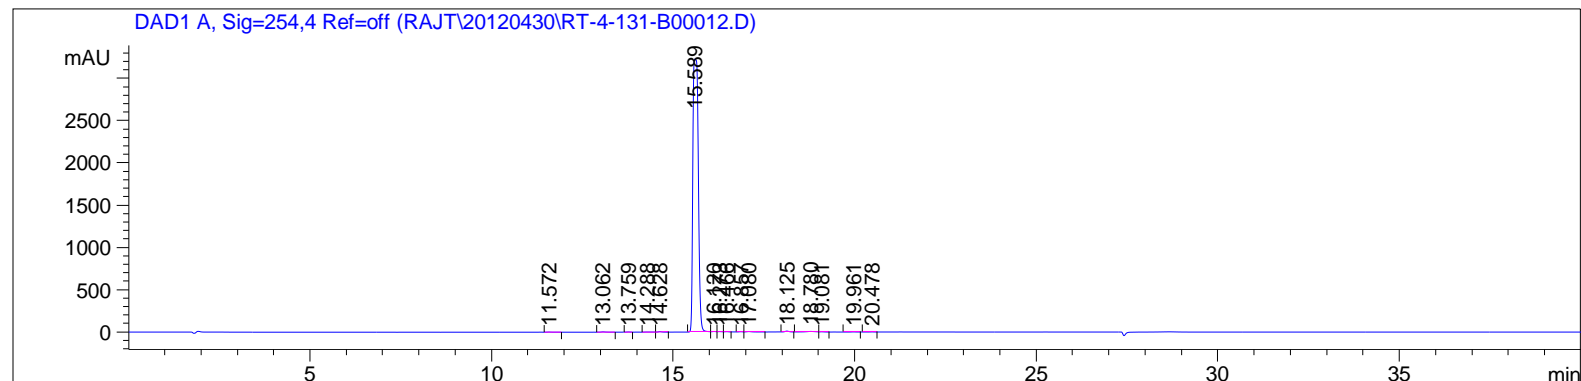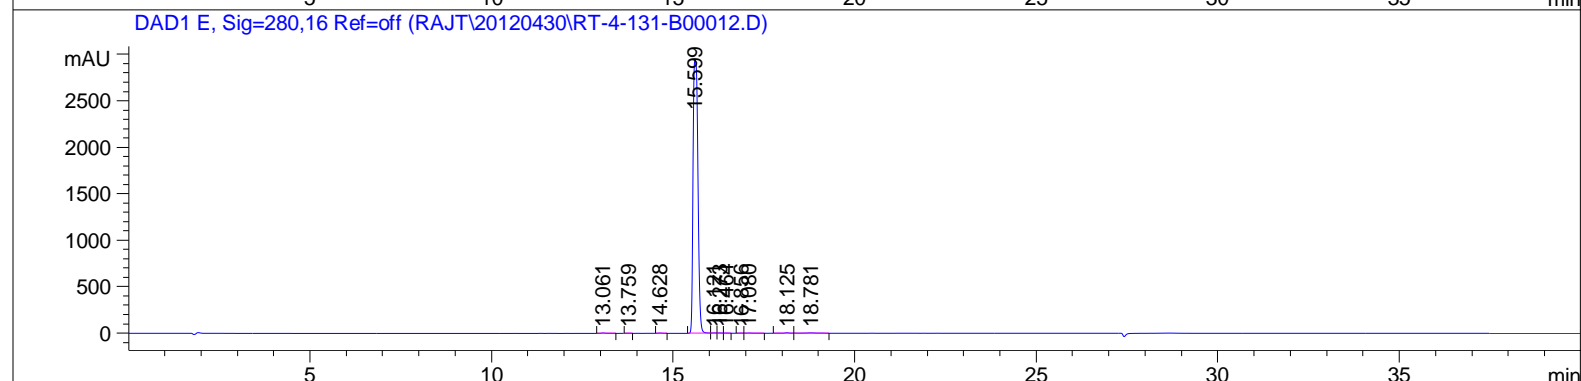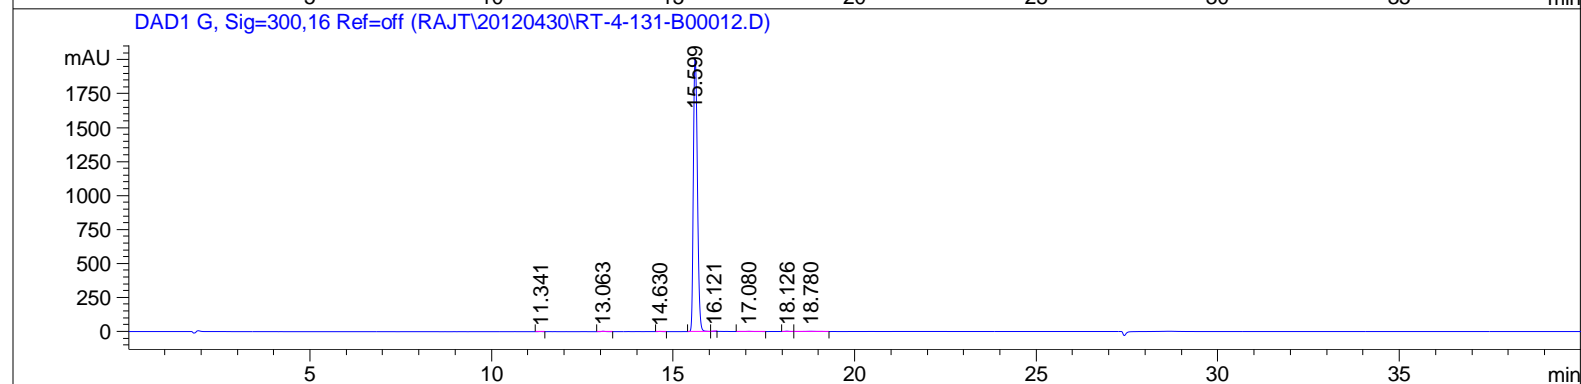

```

=====
Area Percent Report
=====

```

```

Sorted By      : Signal
Multiplier    : 1.0000
Dilution      : 1.0000
Use Multiplier & Dilution Factor with ISTDs

```

**S34**

Sample Name: RT-4-131-B

**HPLC Traces of Compound 39**

Signal 1: DAD1 A, Sig=254,4 Ref=off

| Peak # | RetTime [min] | Type | Width [min] | Area [mAU*s] | Height [mAU] | Area %  |
|--------|---------------|------|-------------|--------------|--------------|---------|
| 1      | 11.572        | VB   | 0.1054      | 8.86056      | 1.23943      | 0.0261  |
| 2      | 13.062        | BB   | 0.1102      | 27.20675     | 3.68311      | 0.0803  |
| 3      | 13.759        | BB   | 0.0874      | 10.59208     | 1.89063      | 0.0313  |
| 4      | 14.288        | BV   | 0.2203      | 18.97442     | 1.17531      | 0.0560  |
| 5      | 14.628        | VB   | 0.1016      | 38.37364     | 5.62389      | 0.1132  |
| 6      | 15.589        | BV   | 0.1429      | 3.34502e4    | 3228.04907   | 98.6956 |
| 7      | 16.120        | VV   | 0.1071      | 31.60700     | 4.33520      | 0.0933  |
| 8      | 16.273        | VB   | 0.1064      | 17.84558     | 2.58799      | 0.0527  |
| 9      | 16.466        | BB   | 0.0856      | 11.81588     | 2.16696      | 0.0349  |
| 10     | 16.857        | BV   | 0.1017      | 16.46457     | 2.47145      | 0.0486  |
| 11     | 17.080        | VB   | 0.1409      | 41.37674     | 4.27482      | 0.1221  |
| 12     | 18.125        | VB   | 0.1104      | 71.28476     | 9.85255      | 0.2103  |
| 13     | 18.780        | BV   | 0.2670      | 108.13129    | 6.09411      | 0.3190  |
| 14     | 19.081        | VB   | 0.1237      | 19.76235     | 2.35965      | 0.0583  |
| 15     | 19.961        | BB   | 0.1135      | 10.75092     | 1.43386      | 0.0317  |
| 16     | 20.478        | BB   | 0.1287      | 9.04683      | 1.00768      | 0.0267  |

Totals : 3.38923e4 3278.24572

Signal 2: DAD1 E, Sig=280,16 Ref=off

| Peak # | RetTime [min] | Type | Width [min] | Area [mAU*s] | Height [mAU] | Area %  |
|--------|---------------|------|-------------|--------------|--------------|---------|
| 1      | 13.061        | BB   | 0.1090      | 31.49128     | 4.31984      | 0.1143  |
| 2      | 13.759        | BB   | 0.0833      | 6.19469      | 1.14234      | 0.0225  |
| 3      | 14.628        | BB   | 0.0934      | 17.87844     | 2.92045      | 0.0649  |
| 4      | 15.599        | BV   | 0.1484      | 2.73023e4    | 2939.58716   | 99.0950 |
| 5      | 16.121        | VV   | 0.1074      | 23.29576     | 3.18086      | 0.0846  |
| 6      | 16.273        | VB   | 0.1079      | 13.74622     | 1.95867      | 0.0499  |
| 7      | 16.464        | BB   | 0.0837      | 5.76066      | 1.08907      | 0.0209  |
| 8      | 16.856        | BV   | 0.1011      | 8.87318      | 1.34317      | 0.0322  |
| 9      | 17.080        | VB   | 0.1391      | 21.14997     | 2.22139      | 0.0768  |
| 10     | 18.125        | BB   | 0.1151      | 41.07819     | 5.37657      | 0.1491  |
| 11     | 18.781        | BB   | 0.2910      | 79.88758     | 3.83501      | 0.2900  |

Totals : 2.75517e4 2966.97454

**S35**

Sample Name: RT-4-131-B

**HPLC Traces of Compound 39**

Signal 3: DAD1 G, Sig=300,16 Ref=off

| Peak # | RetTime [min] | Type | Width [min] | Area [mAU*s] | Height [mAU] | Area %  |
|--------|---------------|------|-------------|--------------|--------------|---------|
| 1      | 11.341        | BB   | 0.0847      | 5.57106      | 1.00514      | 0.0353  |
| 2      | 13.063        | BB   | 0.1015      | 20.03703     | 2.94152      | 0.1270  |
| 3      | 14.630        | BB   | 0.0927      | 6.82812      | 1.12611      | 0.0433  |
| 4      | 15.599        | BV   | 0.1251      | 1.56773e4    | 2007.88953   | 99.3510 |
| 5      | 16.121        | VB   | 0.0906      | 7.19840      | 1.22402      | 0.0456  |
| 6      | 17.080        | BB   | 0.1687      | 15.58590     | 1.29198      | 0.0988  |
| 7      | 18.126        | BB   | 0.1077      | 15.89127     | 2.26856      | 0.1007  |
| 8      | 18.780        | BB   | 0.2950      | 31.30398     | 1.50286      | 0.1984  |

Totals : 1.57797e4 2019.24970

=====  
\*\*\* End of Report \*\*\*

# HRMS of Compound 39

C:\Xcalibur...\KGP18+ESI\_Orbi\_+ESI

6/6/2013 10:42:04 PM

KGP18+ESI\_Orbi\_+ESI #10 RT: 0.09 AV: 1 NL: 8.10E8  
T: FTMS + p ESI Full ms [50.00-2000.00]

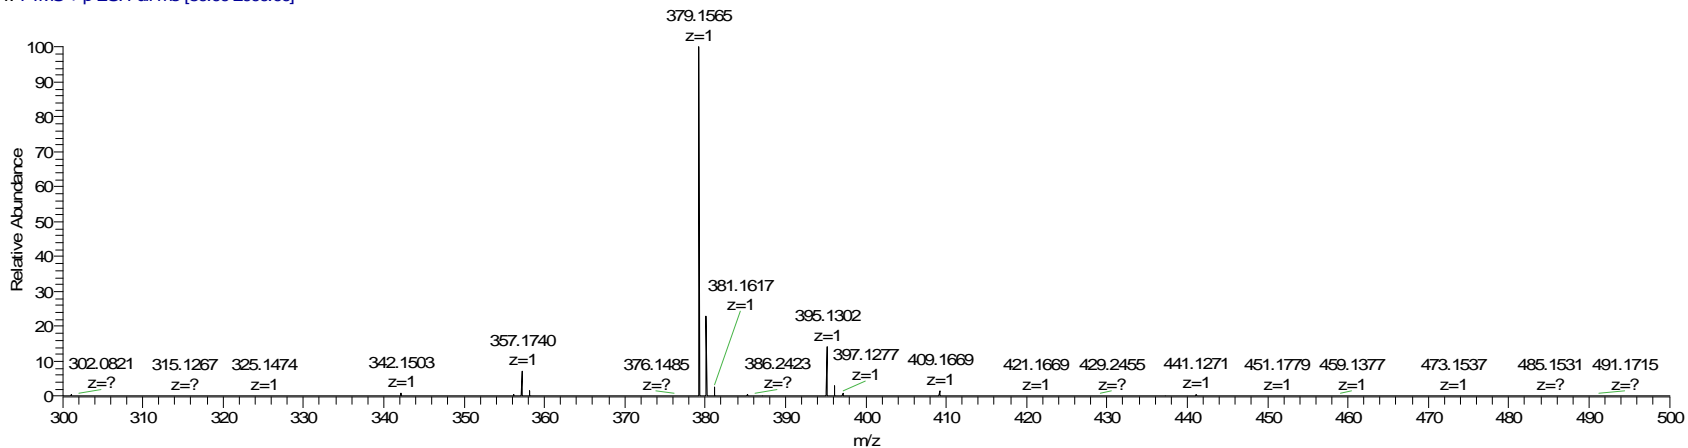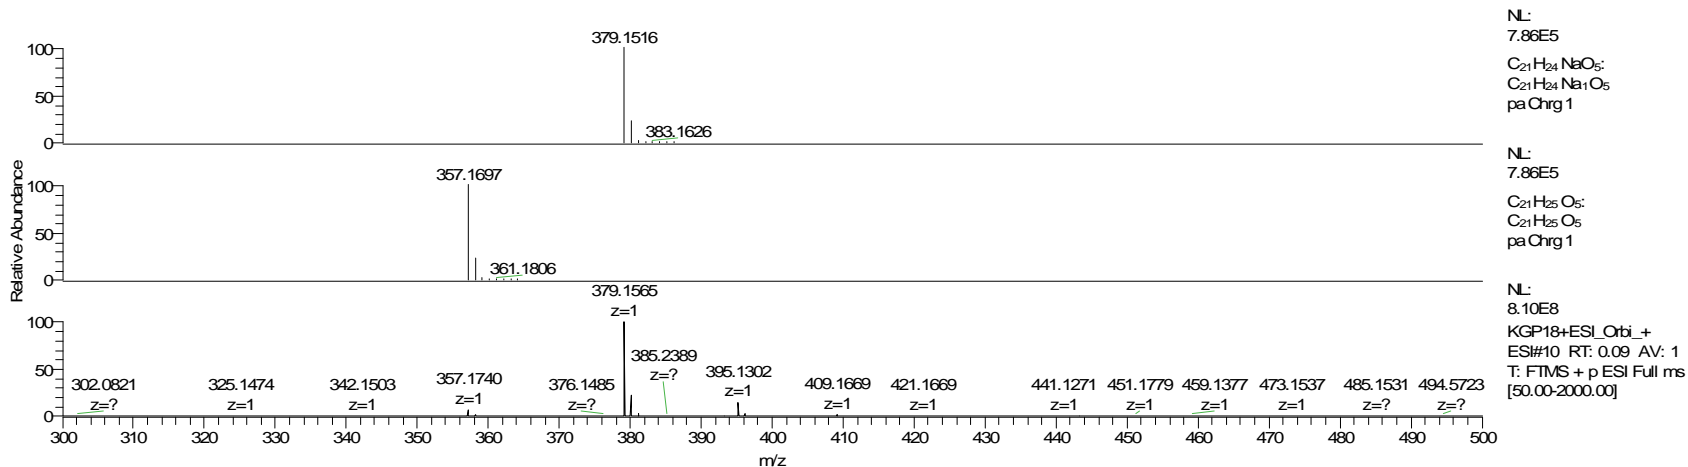

7.29  
7.29  
7.27  
7.27  
7.26  
7.24  
7.24  
7.23  
7.22  
7.21  
7.21  
7.21  
7.21  
7.20  
7.20  
7.18  
7.18  
7.07  
7.06  
7.05  
7.05  
6.49  
6.44  
6.42  
6.41

2.68  
2.67  
2.66  
2.22  
2.21  
2.19  
2.18  
2.16  
1.99  
1.98  
1.96  
1.95

3.87  
3.80

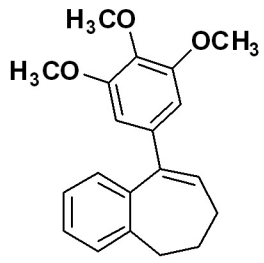

41

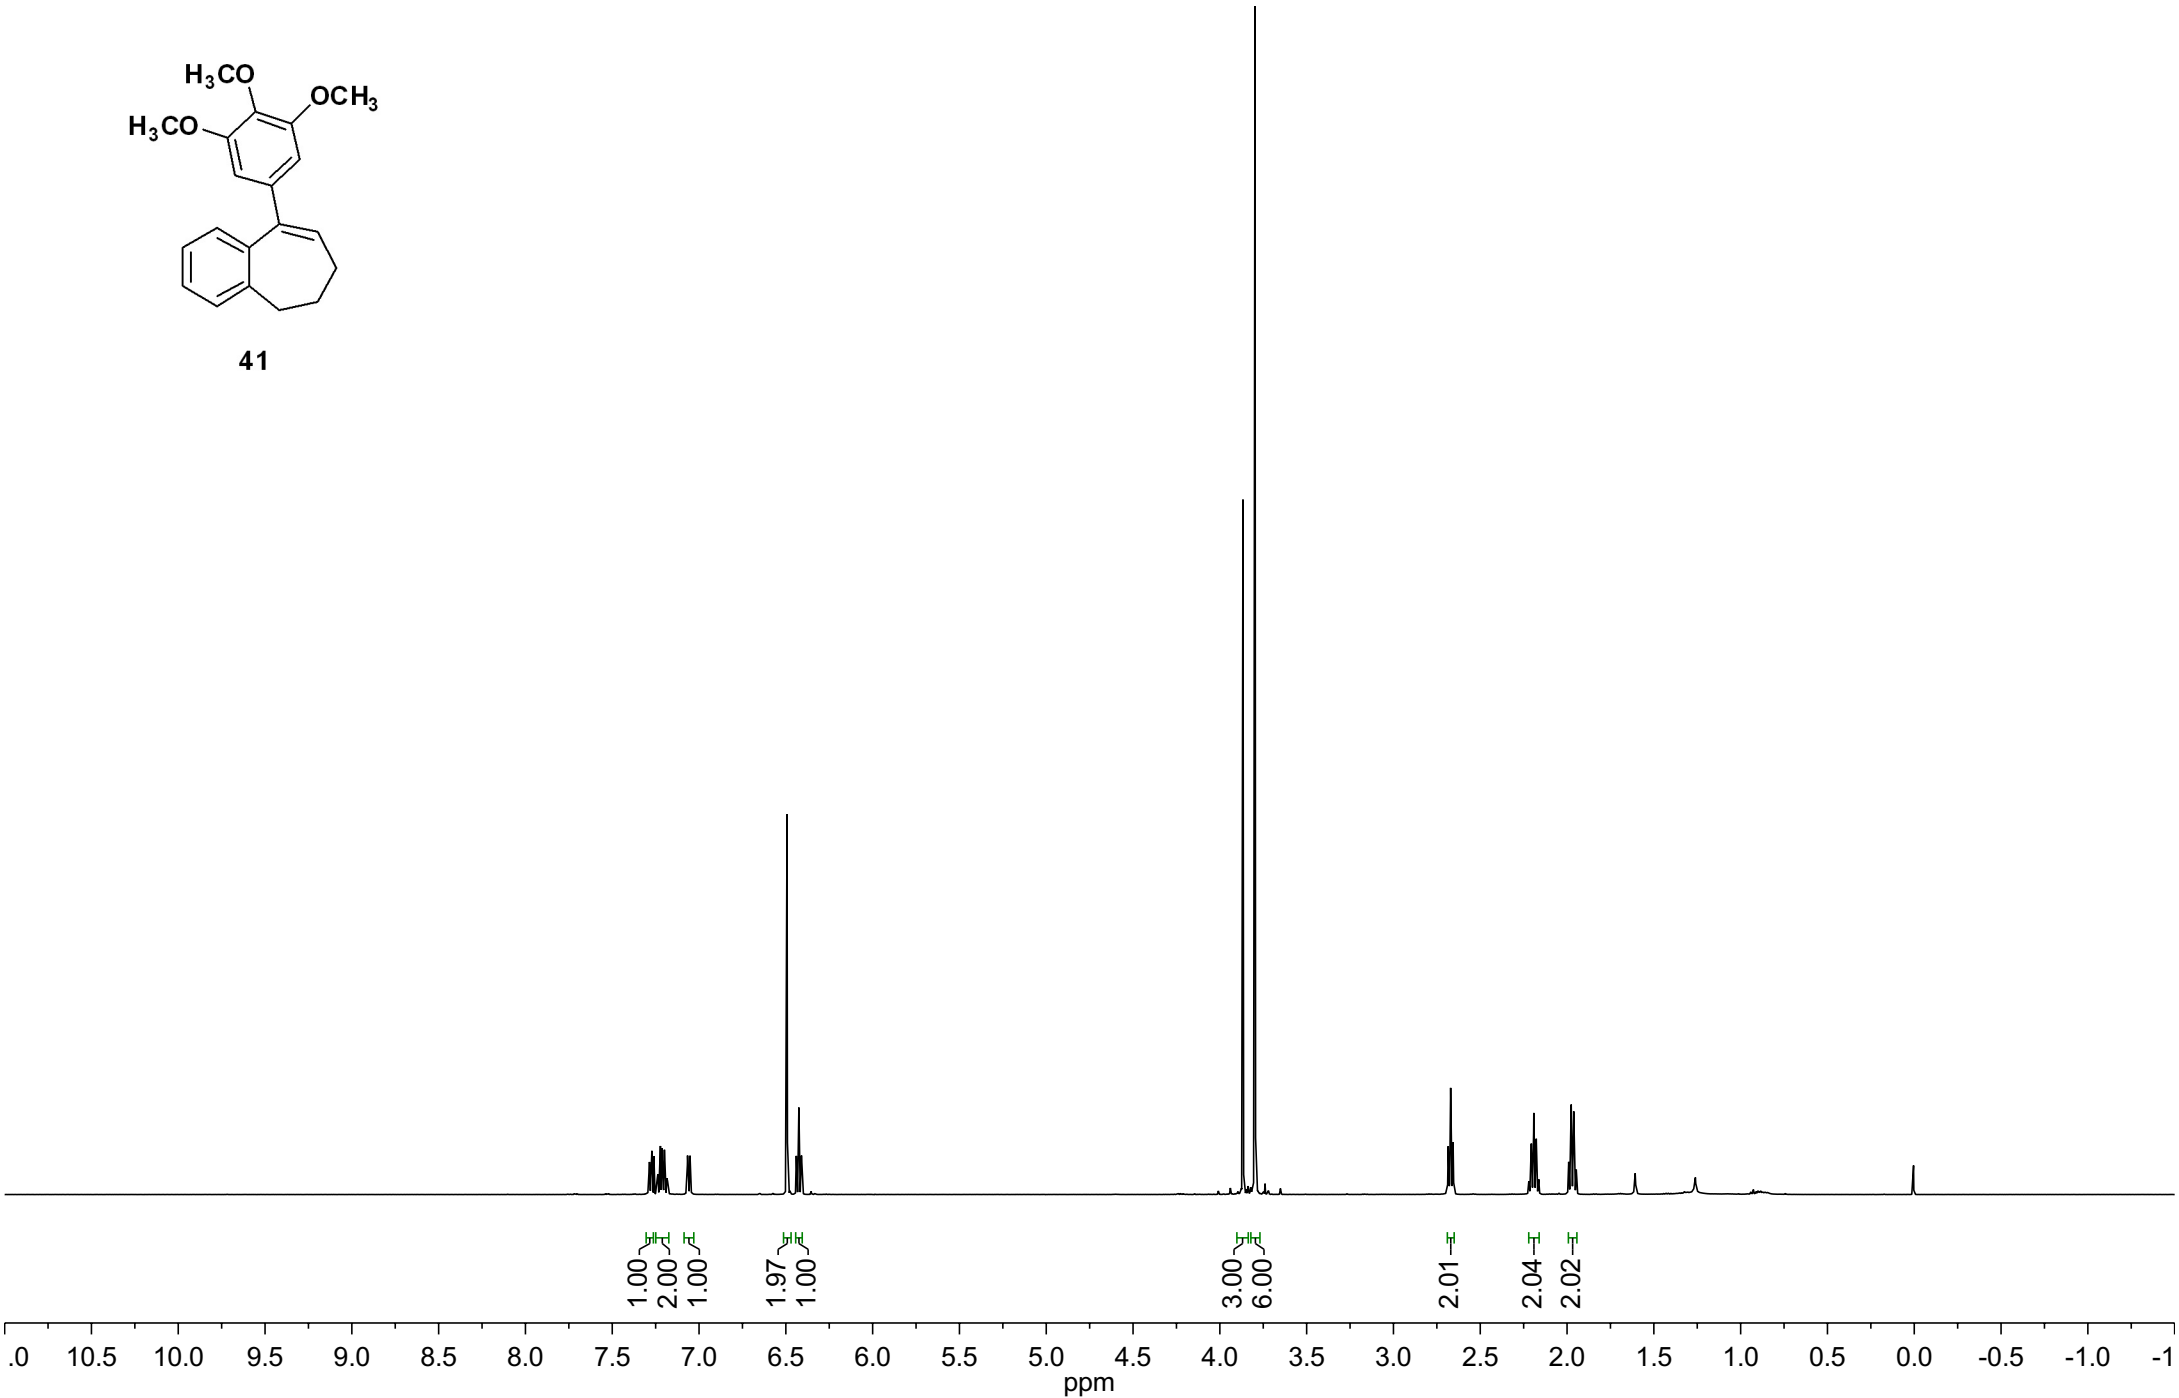

S38

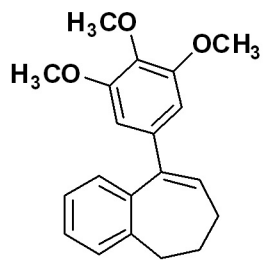

41

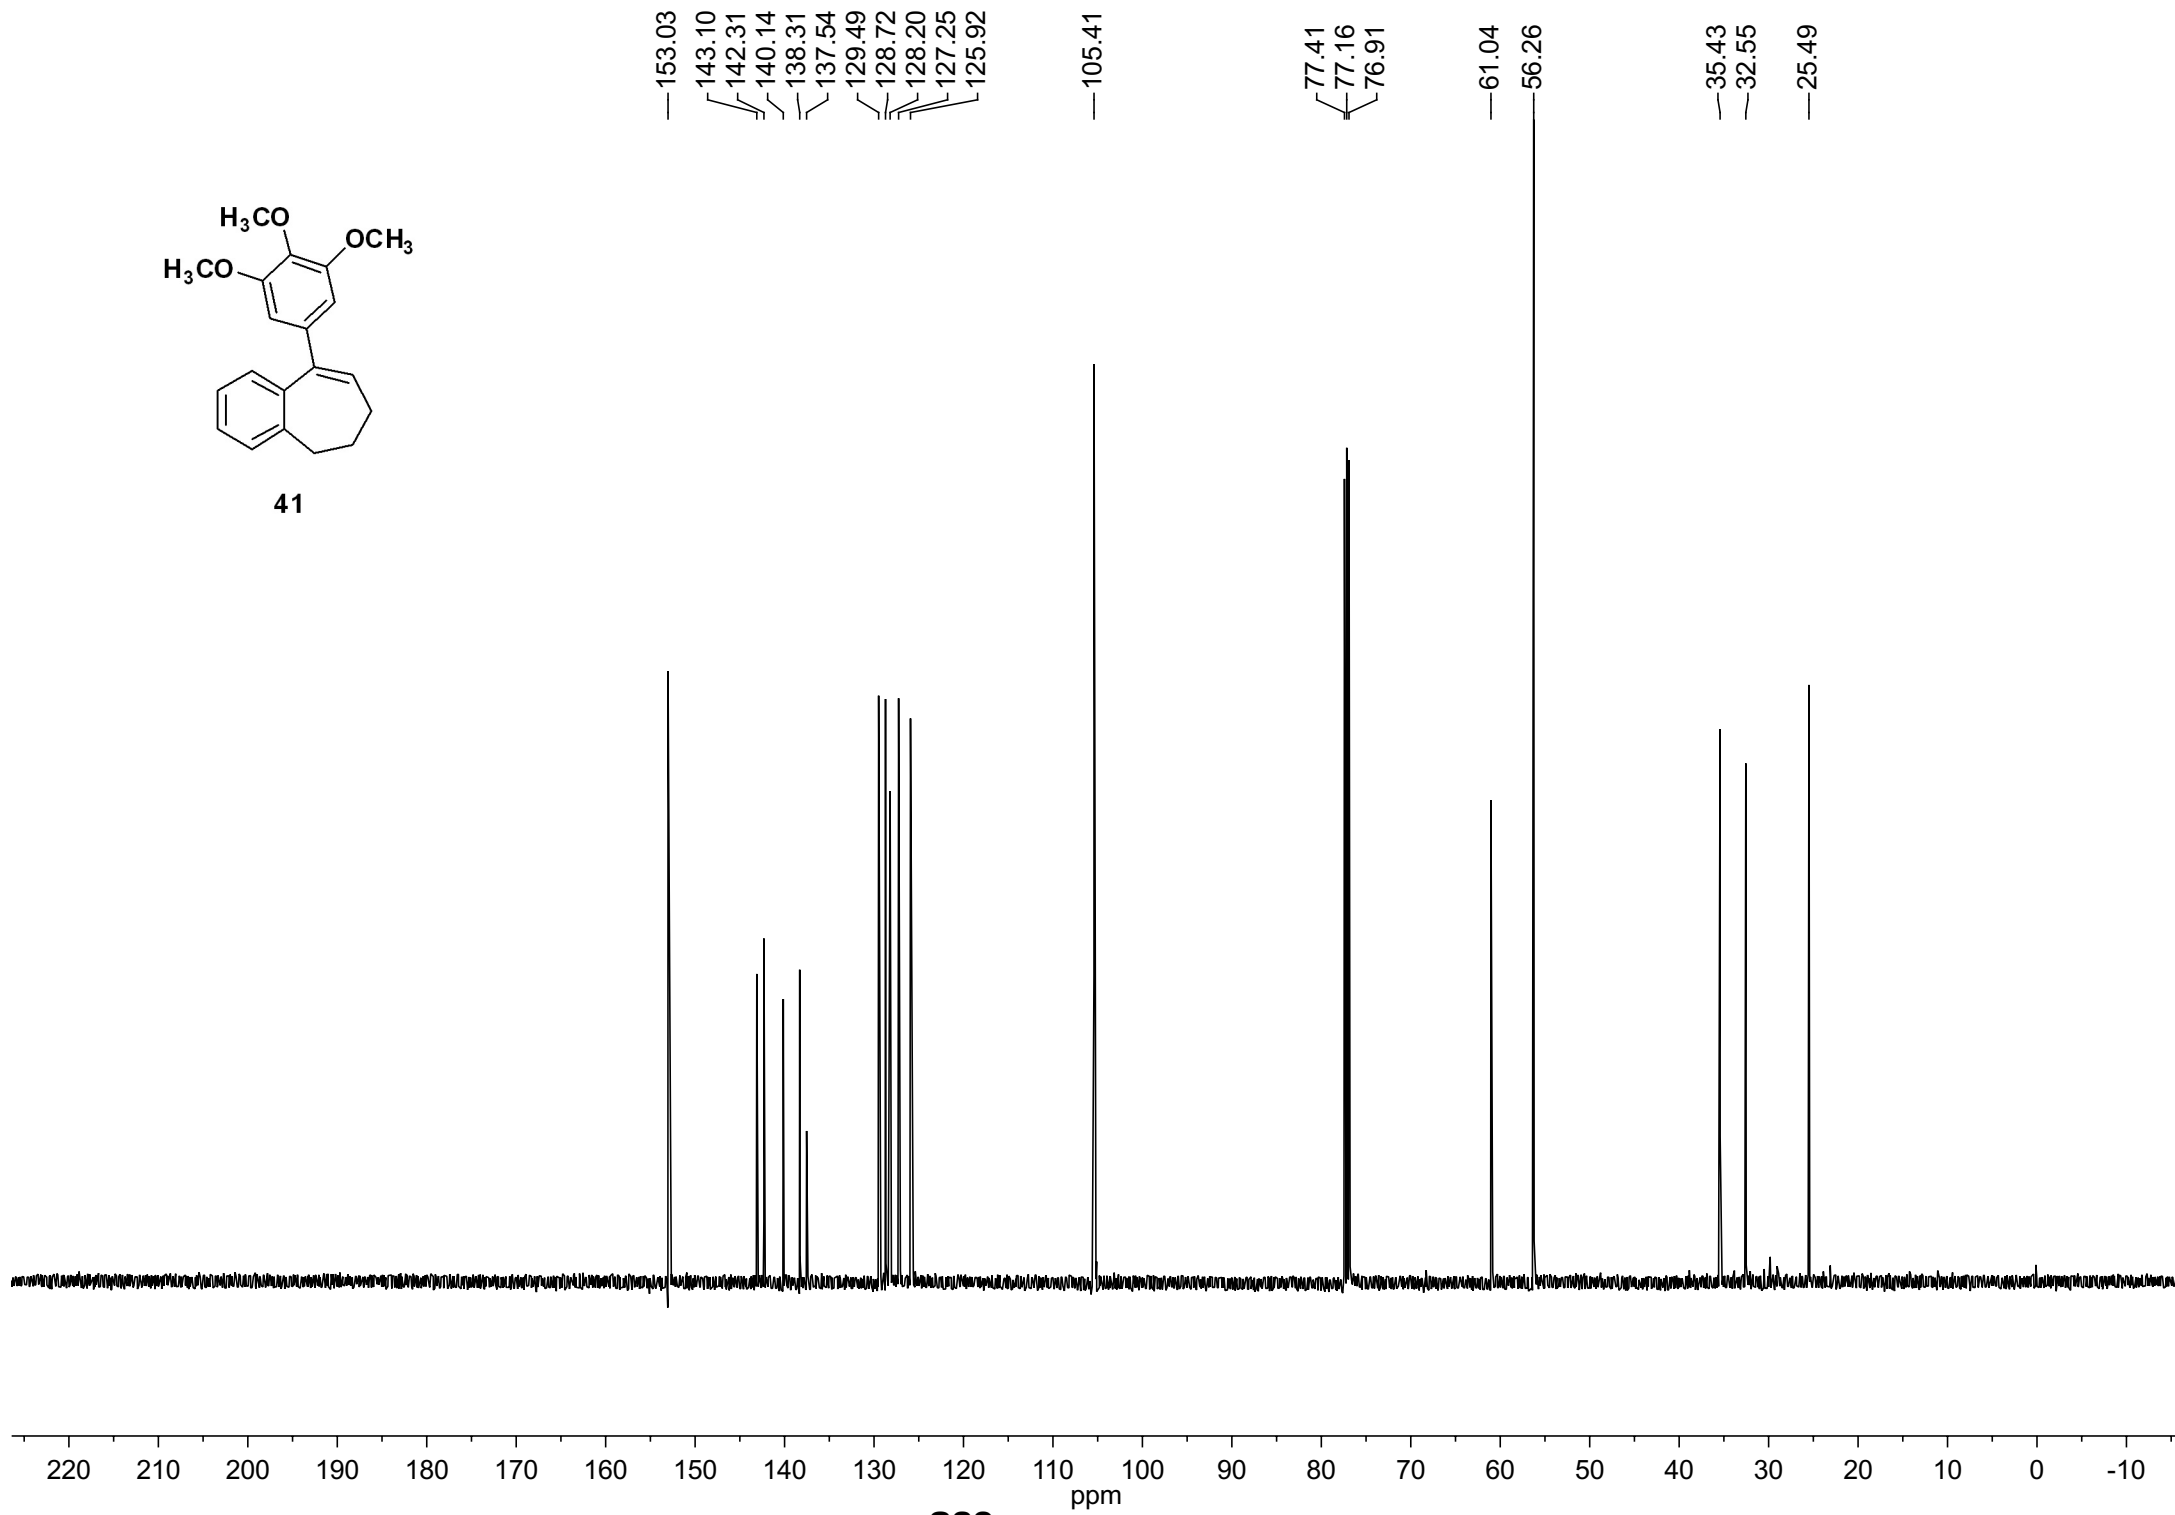

S39

Sample Name: run1

**HPLC Traces of Compound 41**

Acq. Operator : Christine

Location : -

Injection Date : 18-Mar-13, 18:39:39

Acq. Method : MASTERMETHOD.M

Analysis Method : C:\CHEM32\1\DATA\MATT MAC\CSG\_VII\_1700030.D\DA.M (MASTERMETHOD.M)

Last changed : 3/18/2013 5:03:32 PM by Christine

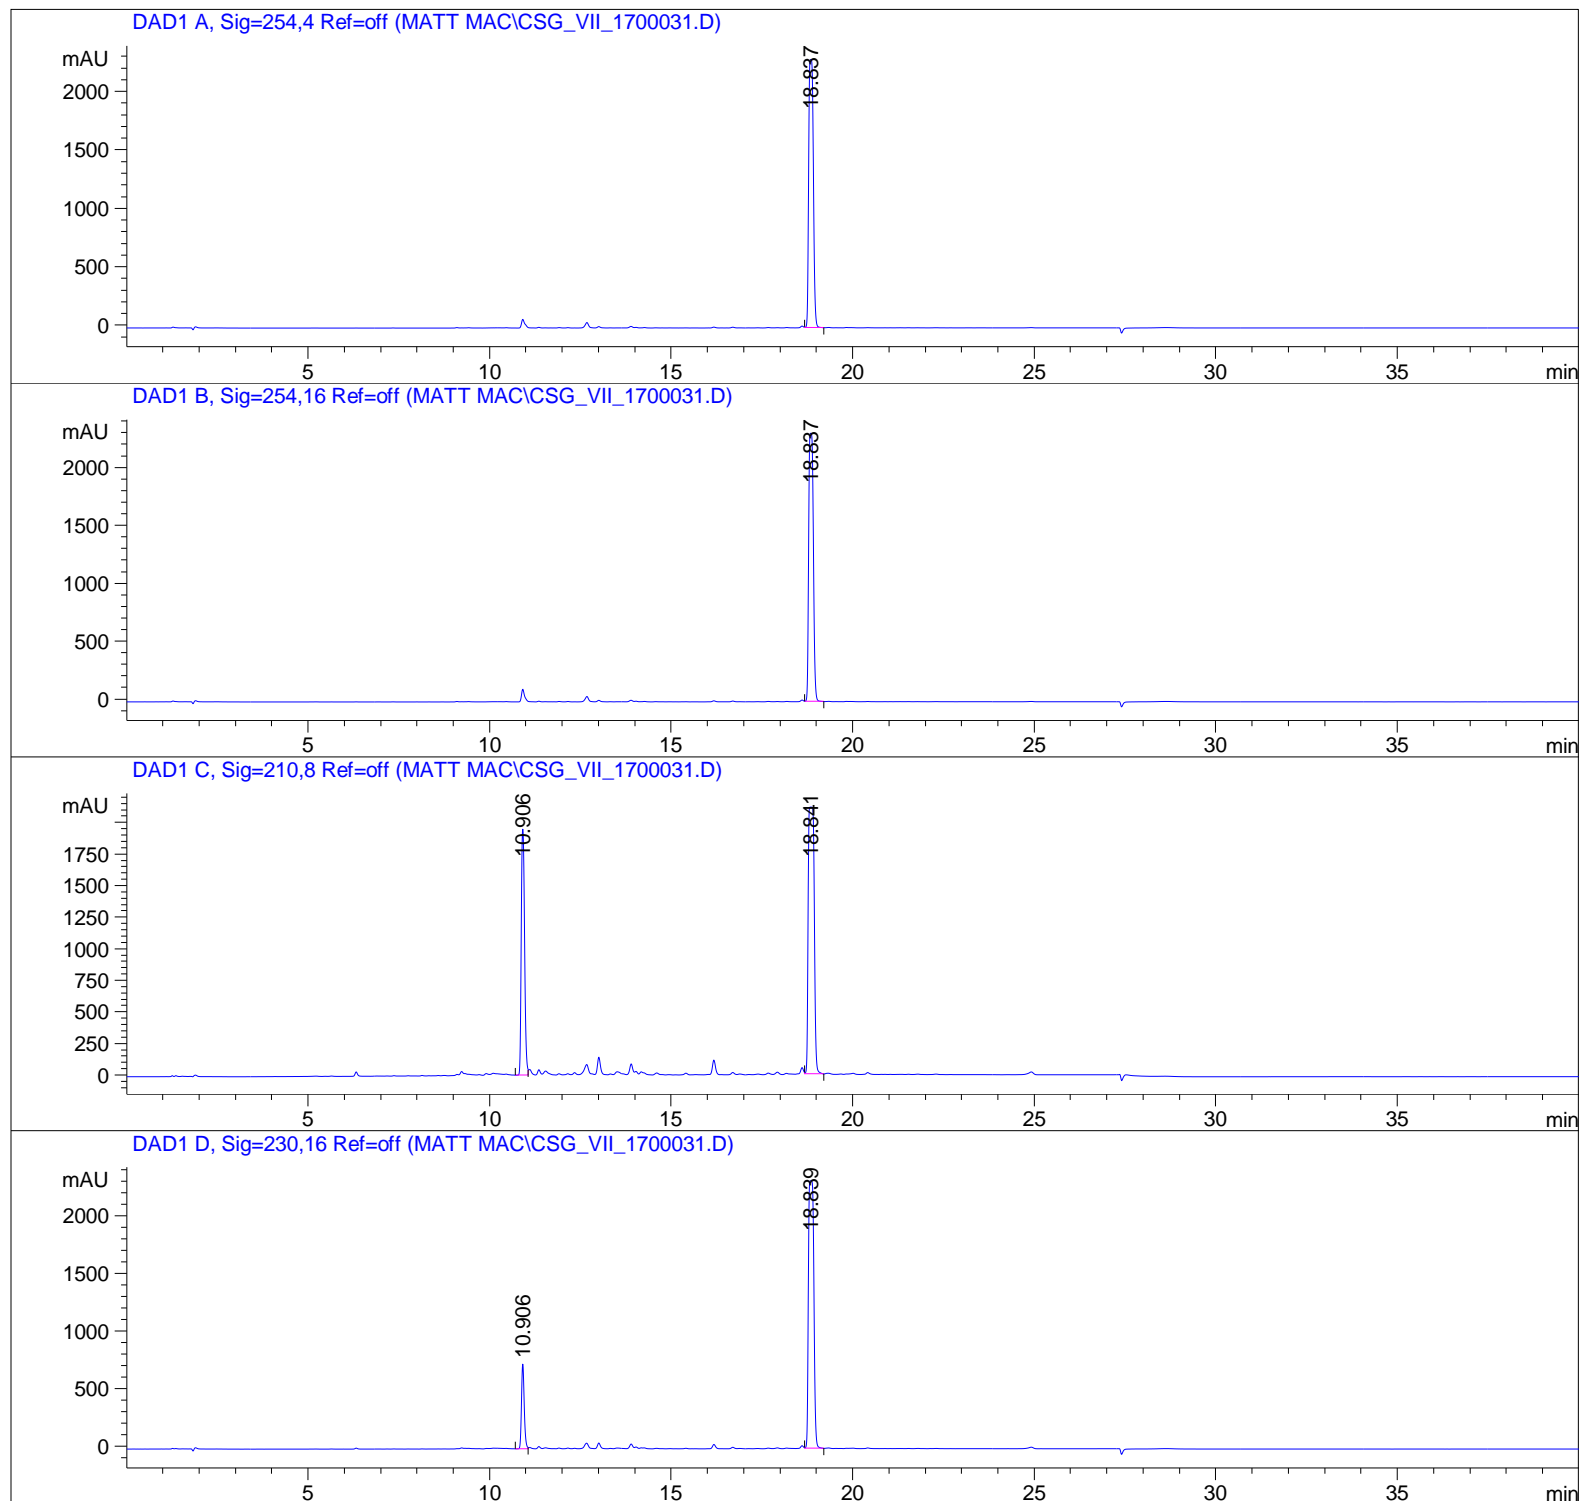**S40**



Sample Name: run1

**HPLC of Compound 41**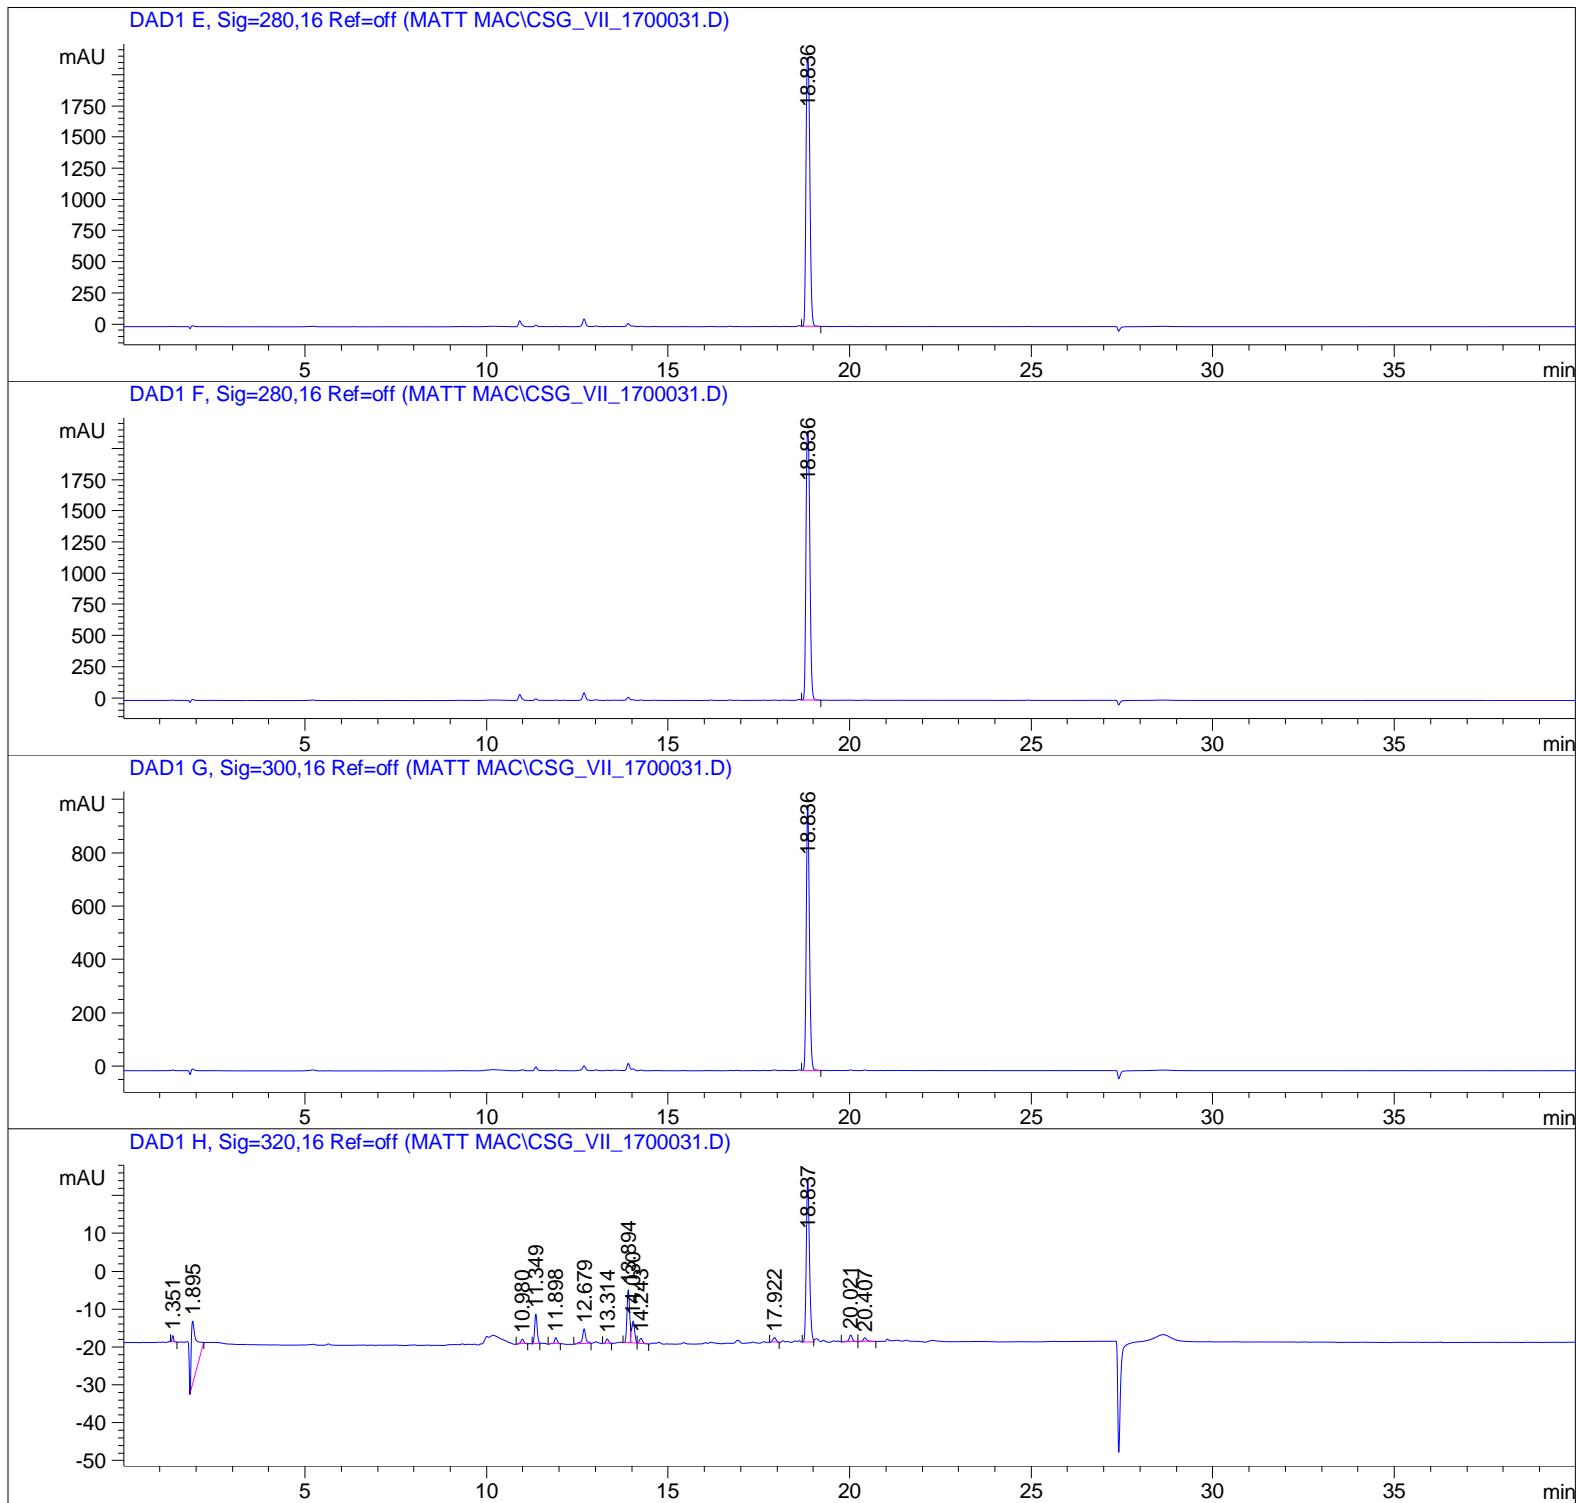

=====  
 Area Percent Report  
 =====

Sorted By : Signal  
 Multiplier : 1.0000  
 Dilution : 1.0000  
 Use Multiplier & Dilution Factor with ISTDs

**s41**

Sample Name: run1

### HPLC Traces of Compound 41

Signal 1: DAD1 A, Sig=254,4 Ref=off

| Peak # | RetTime [min] | Type | Width [min] | Area [mAU*s] | Height [mAU] | Area %   |
|--------|---------------|------|-------------|--------------|--------------|----------|
| 1      | 18.837        | VV   | 0.1428      | 2.02356e4    | 2296.00977   | 100.0000 |

Totals : 2.02356e4 2296.00977

Signal 2: DAD1 B, Sig=254,16 Ref=off

| Peak # | RetTime [min] | Type | Width [min] | Area [mAU*s] | Height [mAU] | Area %   |
|--------|---------------|------|-------------|--------------|--------------|----------|
| 1      | 18.837        | VV   | 0.1430      | 2.04492e4    | 2317.27686   | 100.0000 |

Totals : 2.04492e4 2317.27686

Signal 3: DAD1 C, Sig=210,8 Ref=off

| Peak # | RetTime [min] | Type | Width [min] | Area [mAU*s] | Height [mAU] | Area %  |
|--------|---------------|------|-------------|--------------|--------------|---------|
| 1      | 10.906        | BV   | 0.1018      | 1.23464e4    | 1950.91223   | 33.9416 |
| 2      | 18.841        | VV   | 0.1865      | 2.40290e4    | 2115.81152   | 66.0584 |

Totals : 3.63754e4 4066.72375

Signal 4: DAD1 D, Sig=230,16 Ref=off

| Peak # | RetTime [min] | Type | Width [min] | Area [mAU*s] | Height [mAU] | Area %  |
|--------|---------------|------|-------------|--------------|--------------|---------|
| 1      | 10.906        | BV   | 0.0812      | 3872.71118   | 738.14893    | 14.0531 |
| 2      | 18.839        | VB   | 0.1669      | 2.36850e4    | 2323.09839   | 85.9469 |

Totals : 2.75577e4 3061.24731

Signal 5: DAD1 E, Sig=280,16 Ref=off

Sample Name: run1

**HPLC Traces of Compound 41**

| Peak # | RetTime [min] | Type | Width [min] | Area [mAU*s] | Height [mAU] | Area %   |
|--------|---------------|------|-------------|--------------|--------------|----------|
| 1      | 18.836        | VB   | 0.1199      | 1.58865e4    | 2157.62085   | 100.0000 |

Totals :                                   1.58865e4   2157.62085

Signal 6: DAD1 F, Sig=280,16 Ref=off

| Peak # | RetTime [min] | Type | Width [min] | Area [mAU*s] | Height [mAU] | Area %   |
|--------|---------------|------|-------------|--------------|--------------|----------|
| 1      | 18.836        | VB   | 0.1199      | 1.58865e4    | 2157.62085   | 100.0000 |

Totals :                                   1.58865e4   2157.62085

Signal 7: DAD1 G, Sig=300,16 Ref=off

| Peak # | RetTime [min] | Type | Width [min] | Area [mAU*s] | Height [mAU] | Area %   |
|--------|---------------|------|-------------|--------------|--------------|----------|
| 1      | 18.836        | VV   | 0.0949      | 6054.54590   | 995.95148    | 100.0000 |

Totals :                                   6054.54590   995.95148

Signal 8: DAD1 H, Sig=320,16 Ref=off

| Peak # | RetTime [min] | Type | Width [min] | Area [mAU*s] | Height [mAU] | Area %  |
|--------|---------------|------|-------------|--------------|--------------|---------|
| 1      | 1.351         | BB   | 0.0473      | 5.07612      | 1.67797      | 0.7572  |
| 2      | 1.895         | BB   | 0.1439      | 172.15982    | 17.03720     | 25.6803 |
| 3      | 10.980        | BB   | 0.0885      | 7.75652      | 1.28375      | 1.1570  |
| 4      | 11.349        | BB   | 0.0739      | 37.24184     | 7.77304      | 5.5552  |
| 5      | 11.898        | BB   | 0.0860      | 9.72162      | 1.66915      | 1.4501  |
| 6      | 12.679        | BB   | 0.0971      | 25.70506     | 3.89024      | 3.8343  |
| 7      | 13.314        | BB   | 0.0821      | 6.45013      | 1.21096      | 0.9621  |
| 8      | 13.894        | BV   | 0.0813      | 73.76592     | 14.04108     | 11.0033 |
| 9      | 14.030        | VV   | 0.0809      | 31.19659     | 5.78939      | 4.6534  |
| 10     | 14.243        | VB   | 0.0903      | 7.98895      | 1.36431      | 1.1917  |
| 11     | 17.922        | BB   | 0.1000      | 8.20751      | 1.29417      | 1.2243  |
| 12     | 18.837        | BV   | 0.0959      | 266.21088    | 43.17391     | 39.7094 |
| 13     | 20.021        | BB   | 0.0967      | 11.49719     | 1.79475      | 1.7150  |
| 14     | 20.407        | BB   | 0.1047      | 7.41931      | 1.02215      | 1.1067  |

Totals :                                   670.39748   103.02209

**S43**

## HPLC Traces of Compound 41

=====  
\*\*\* End of Report \*\*\*

# HRMS of Compound 41

C:\Xcalibur\...ICSG-VI-97\_130327182827

3/27/2013 6:28:28 PM

CSG-VI-97

CSG-VI-97\_130327182827 #3 RT: 0.02 AV: 1 NL: 1.44E7  
T: FTMS + p ESI Full ms [150.00-1000.00]

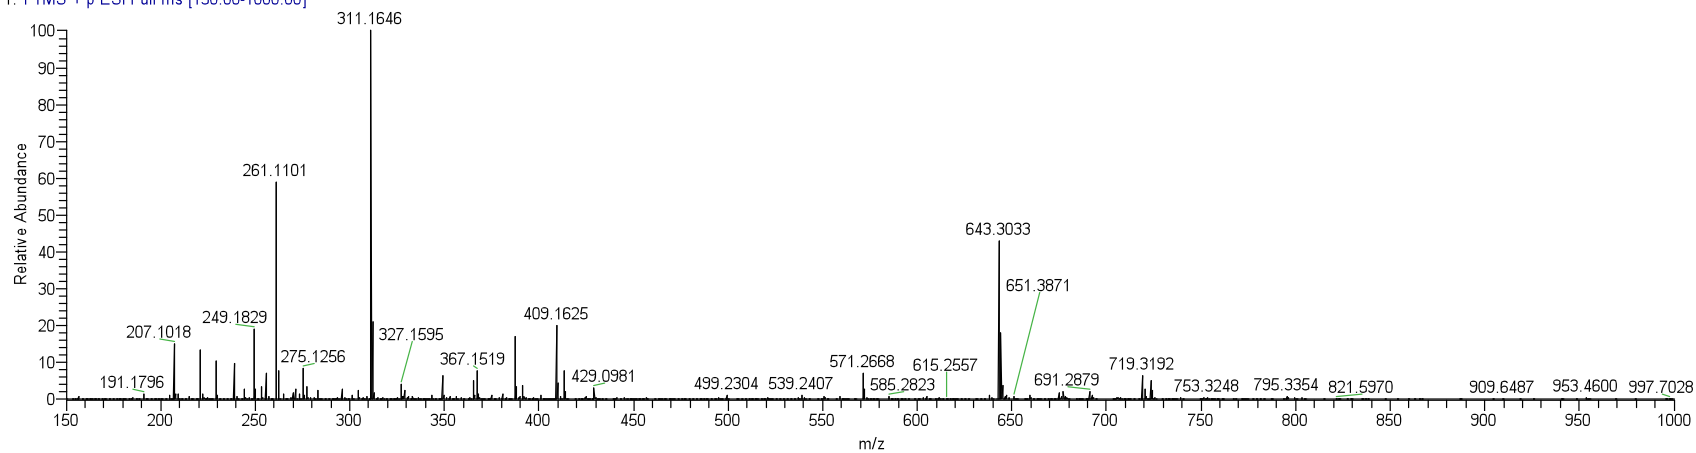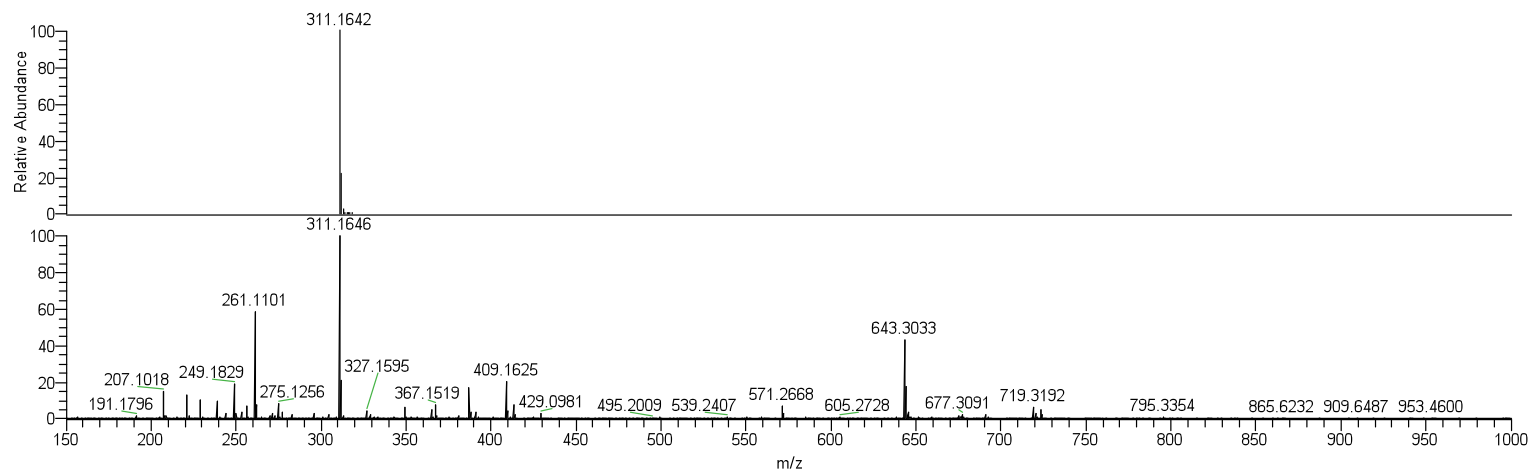

NL:  
7.98E5  
C<sub>20</sub>H<sub>23</sub>O<sub>3</sub>  
C<sub>20</sub>H<sub>23</sub>O<sub>3</sub>  
pa Chrg 1

NL:  
1.44E7  
CSG-VI-  
97\_130327182827#3  
RT: 0.02 AV: 1 T:  
FTMS + p ESI Full  
ms [150.00-1000.00]

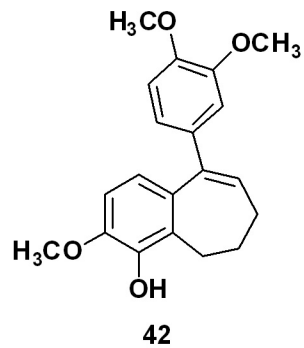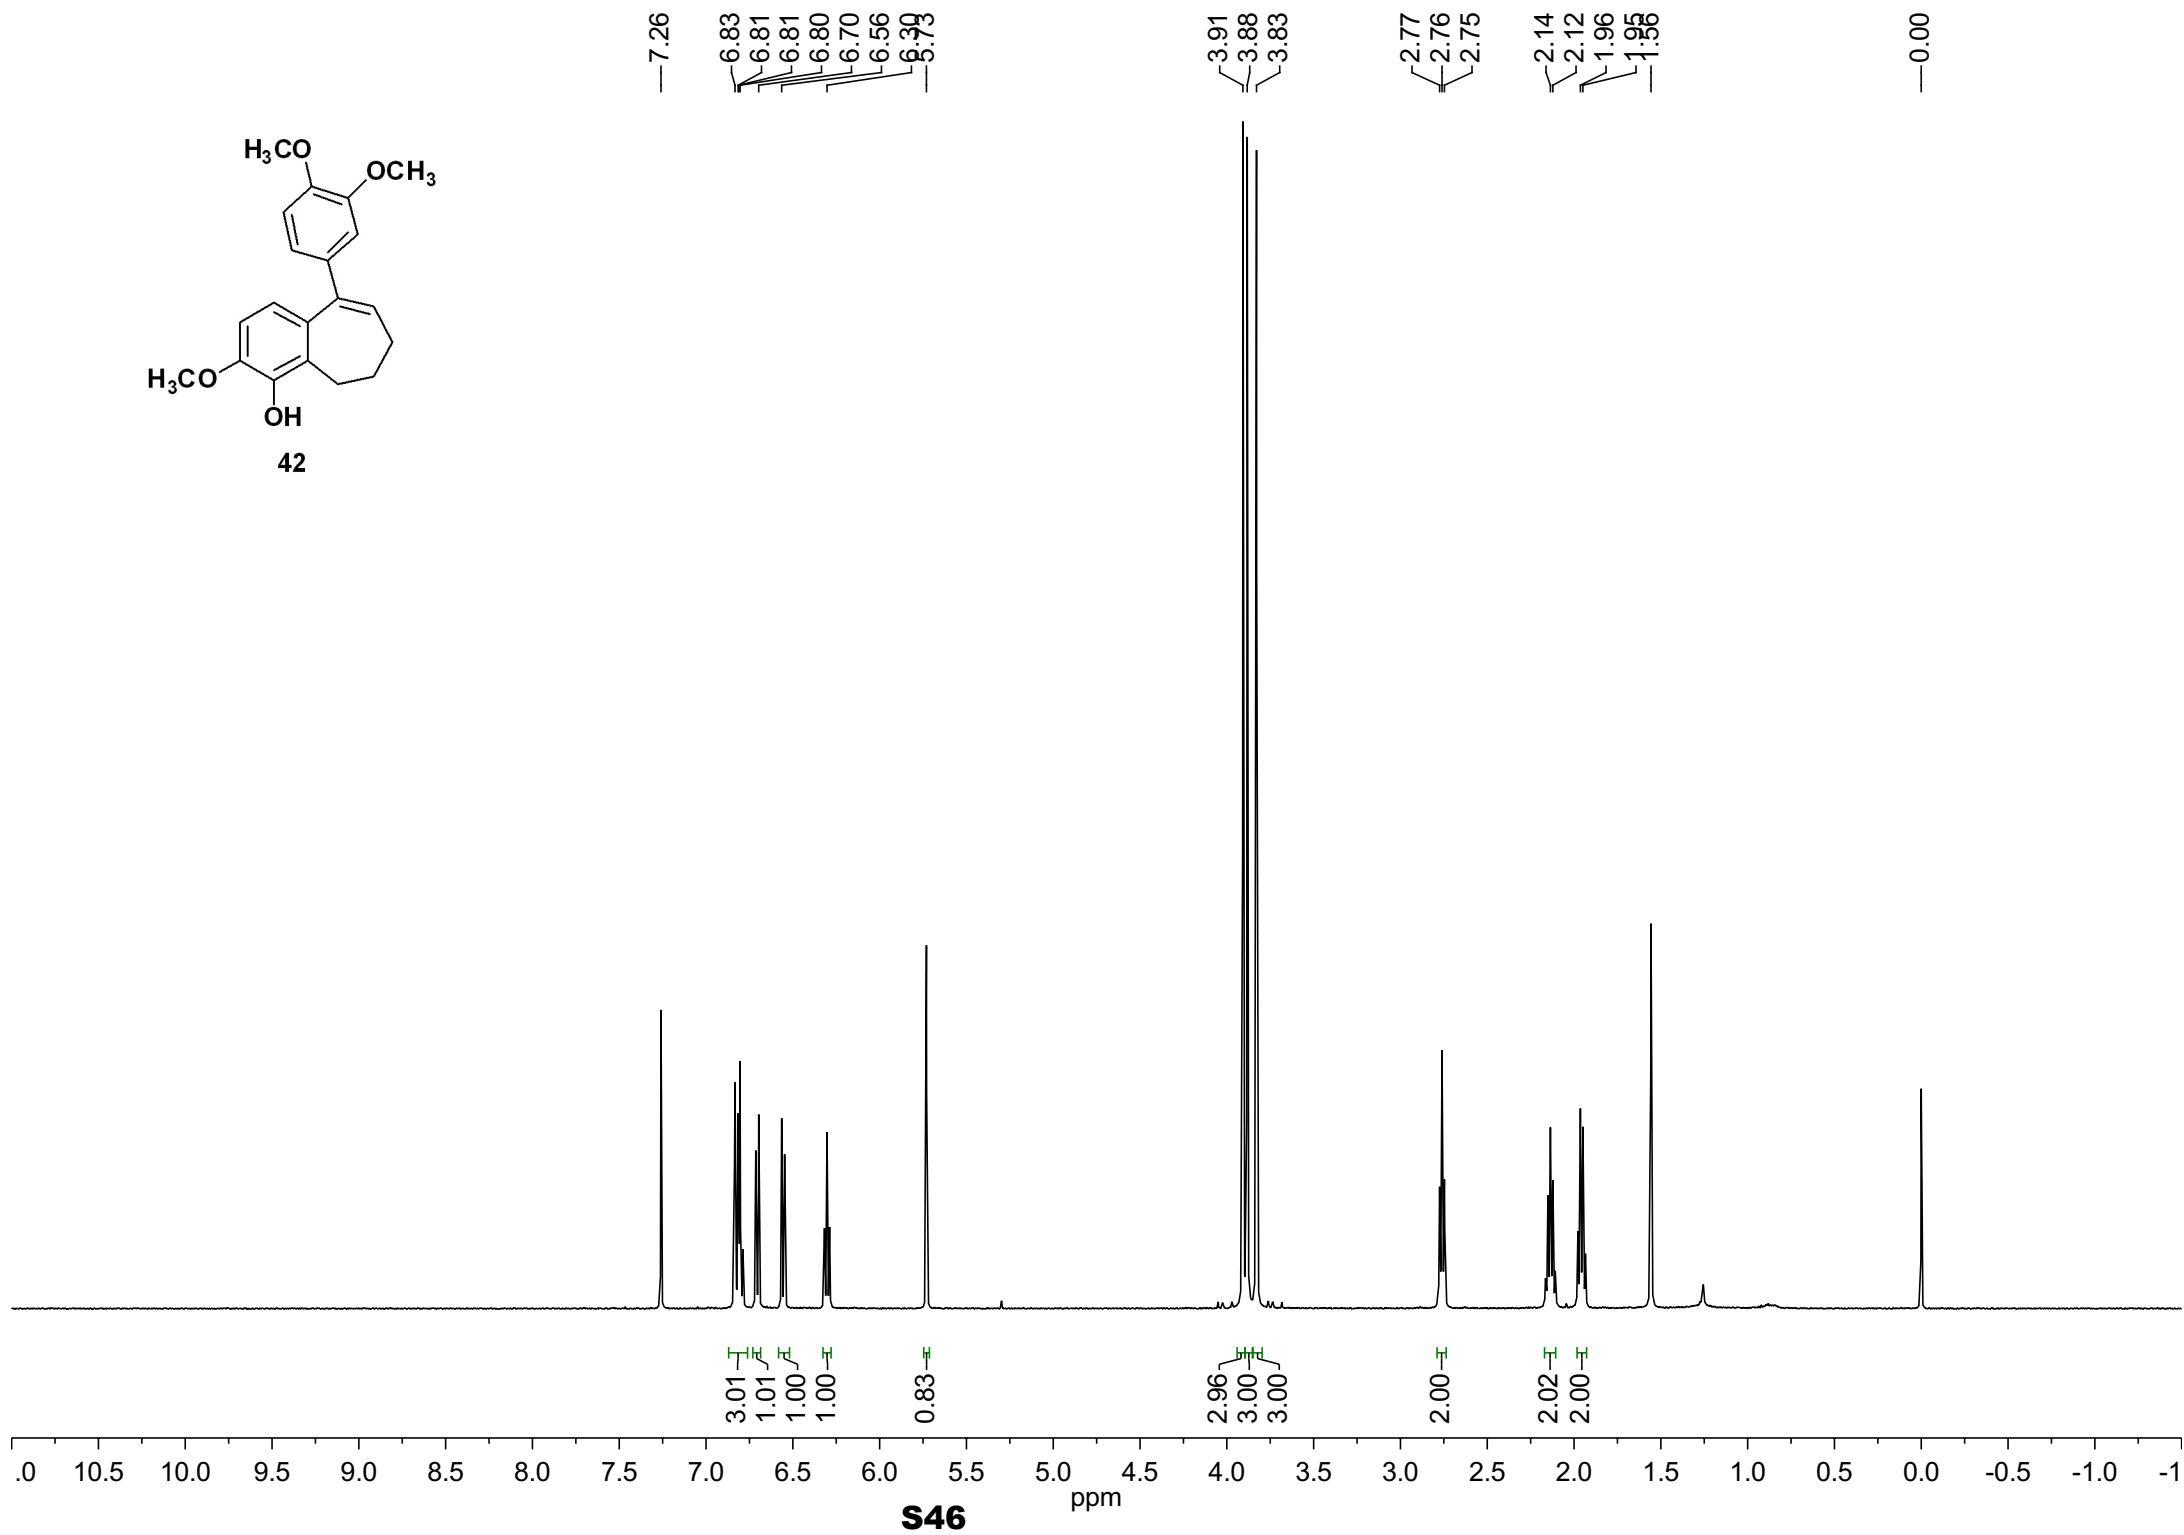

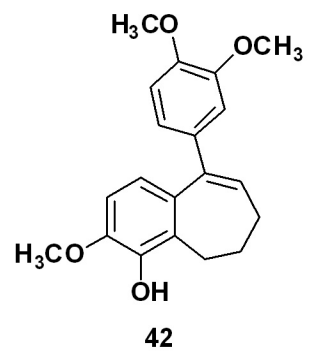

148.610  
148.331  
145.086  
142.515  
142.422  
135.797  
134.691  
127.901  
126.419  
120.803  
120.553  
111.341  
110.810  
107.722

77.414  
77.160  
76.905

56.056  
56.032  
55.985

33.805  
25.768  
23.635

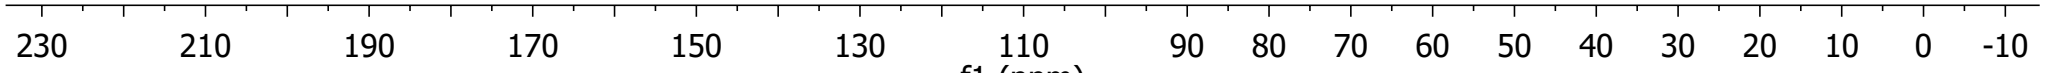

S47 f1 (ppm)

Sample Name: run1

**HPLC Traces of Compound 42**

=====  
Acq. Operator : Christine  
Acq. Instrument : Instrument 1 Location : -  
Injection Date : 3/20/2013 1:42:30 PM  
Acq. Method : C:\CHEM32\1\METHODS\MASTERMETHOD.M  
Last changed : 3/20/2013 1:02:27 PM by Christine  
Analysis Method : C:\CHEM32\1\DATA\CHRISTINE\CSG\_VII\_2900001.D\DA.M (MASTERMETHOD.M)  
Last changed : 3/20/2013 2:41:46 PM by Christine

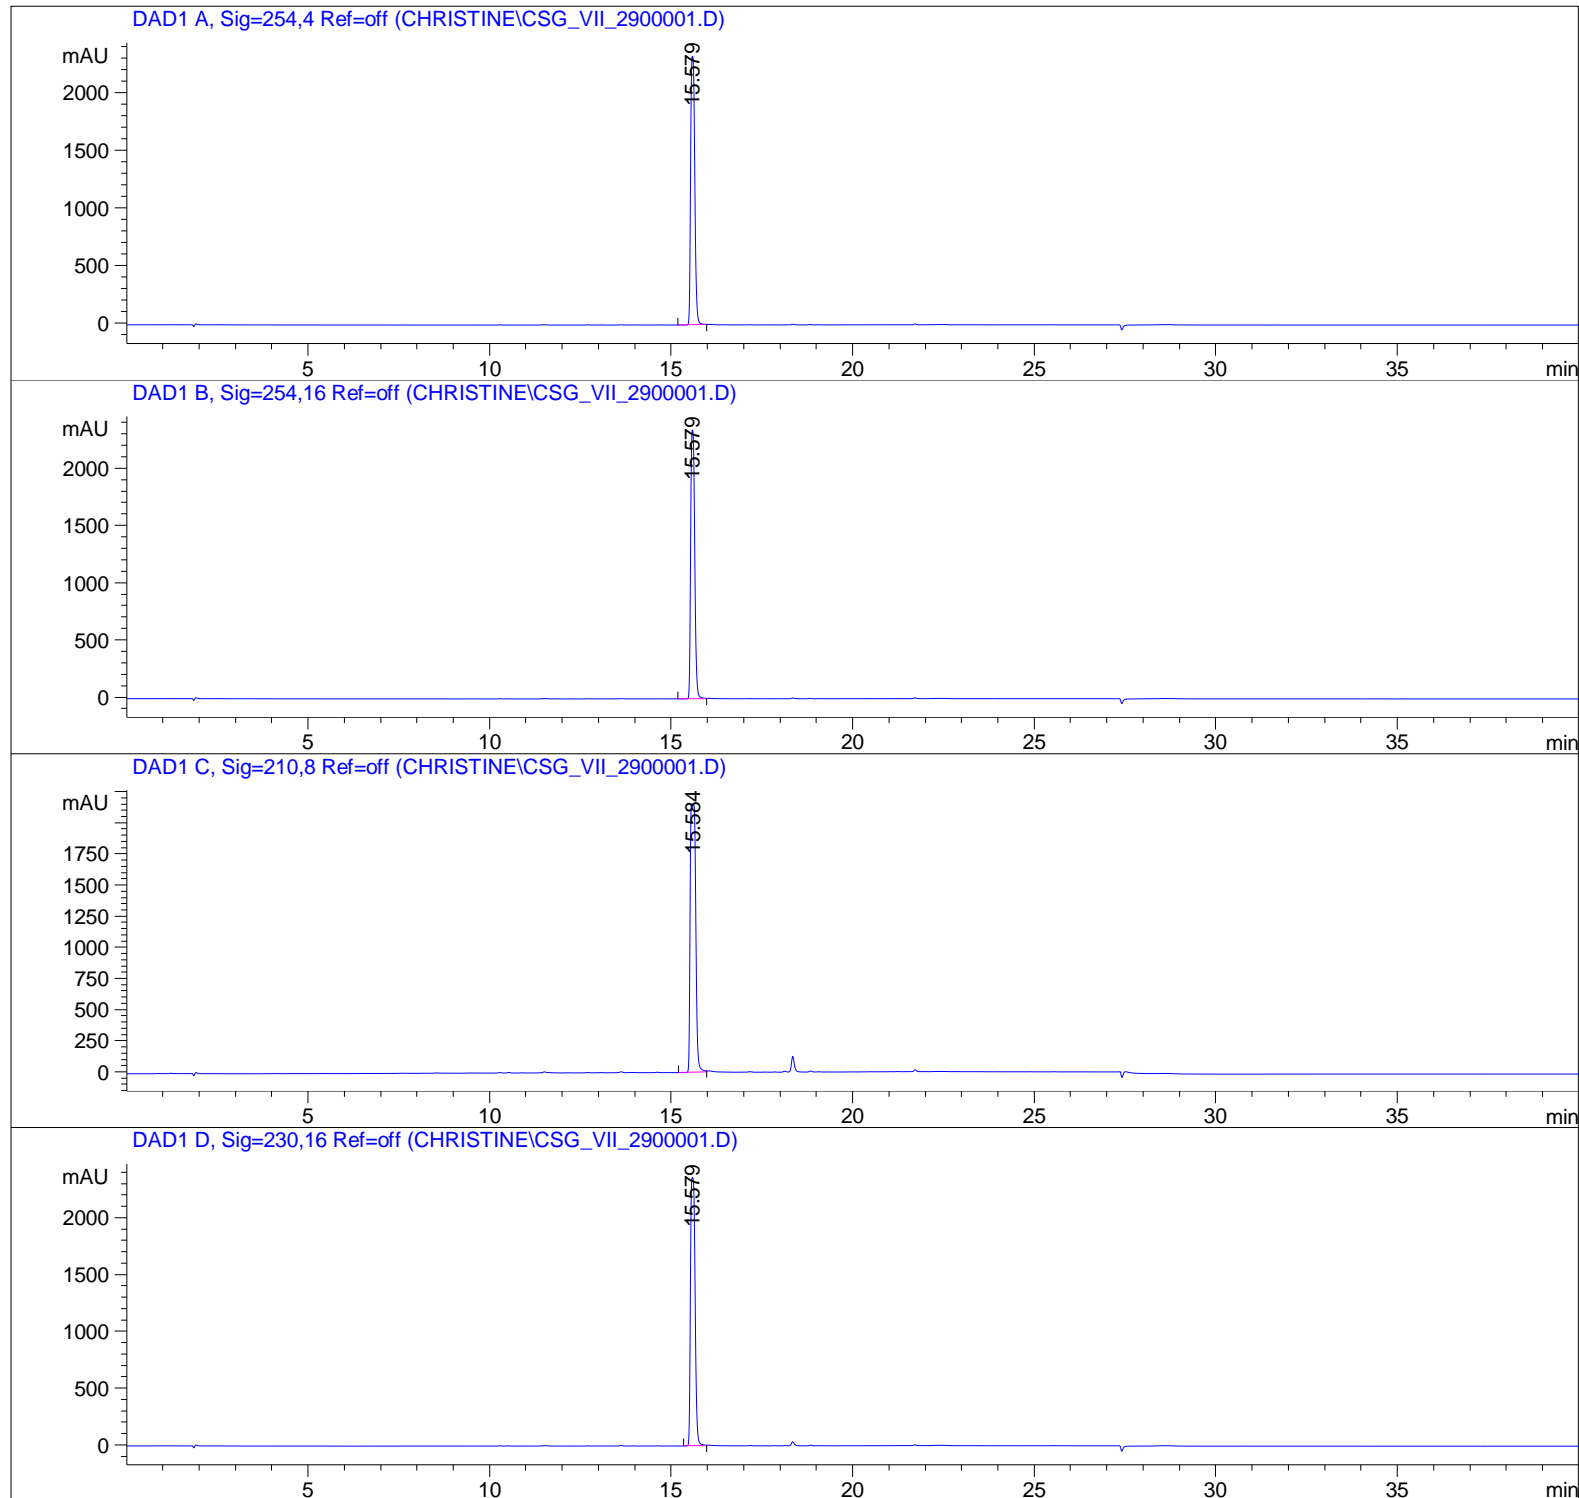**S48**



Sample Name: run1

**HPLC Traces of Compound 42**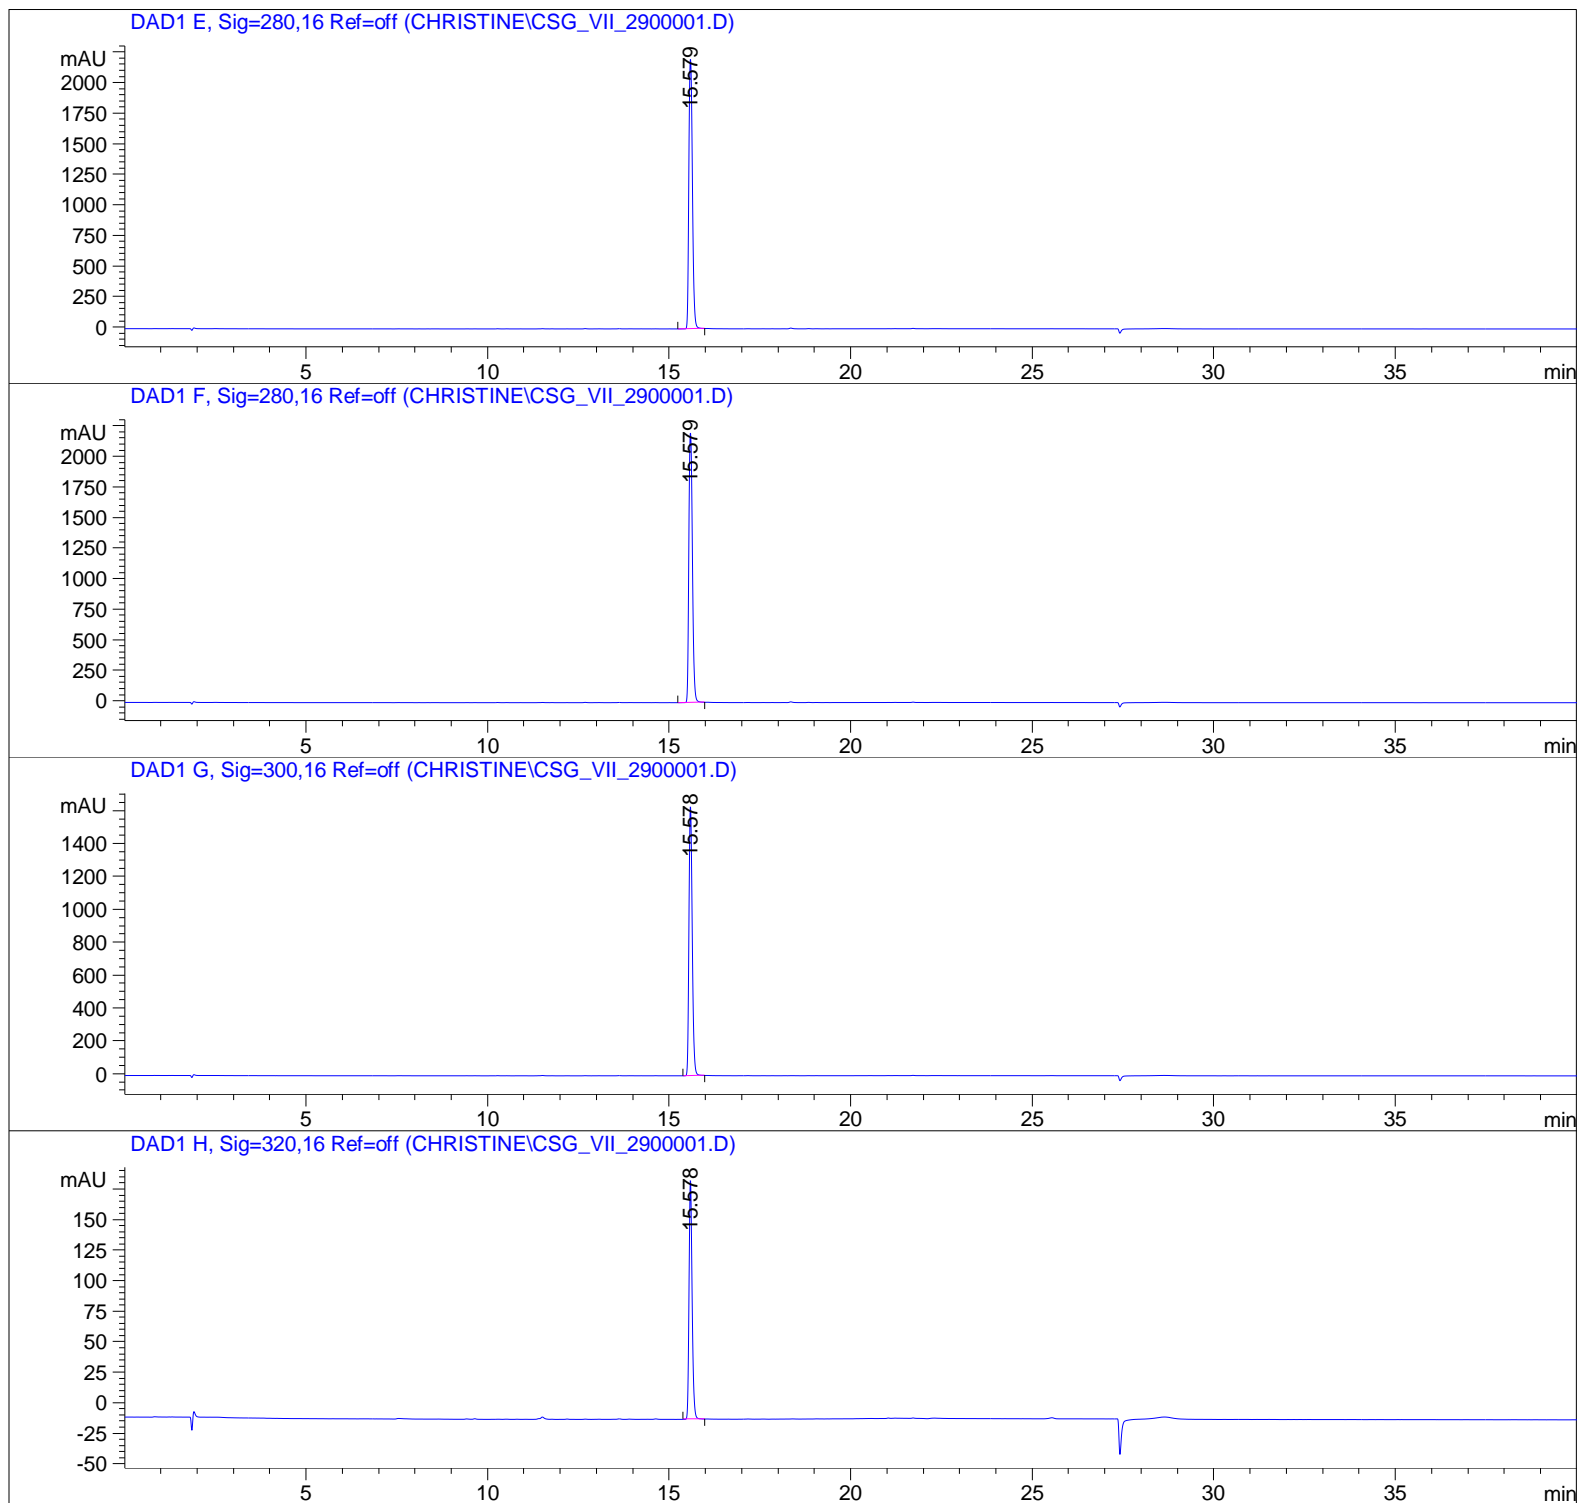=====  
Area Percent Report  
=====

Sorted By : Signal  
Multiplier : 1.0000  
Dilution : 1.0000  
Use Multiplier & Dilution Factor with ISTDs

**S49**

Sample Name: run1

**HPLC Traces of Compound 42**

Signal 1: DAD1 A, Sig=254,4 Ref=off

| Peak # | RetTime [min] | Type | Width [min] | Area [mAU*s] | Height [mAU] | Area %   |
|--------|---------------|------|-------------|--------------|--------------|----------|
| 1      | 15.579        | BV   | 0.1254      | 1.82404e4    | 2327.57520   | 100.0000 |

Totals : 1.82404e4 2327.57520

Signal 2: DAD1 B, Sig=254,16 Ref=off

| Peak # | RetTime [min] | Type | Width [min] | Area [mAU*s] | Height [mAU] | Area %   |
|--------|---------------|------|-------------|--------------|--------------|----------|
| 1      | 15.579        | BV   | 0.1238      | 1.80768e4    | 2347.87866   | 100.0000 |

Totals : 1.80768e4 2347.87866

Signal 3: DAD1 C, Sig=210,8 Ref=off

| Peak # | RetTime [min] | Type | Width [min] | Area [mAU*s] | Height [mAU] | Area %   |
|--------|---------------|------|-------------|--------------|--------------|----------|
| 1      | 15.584        | BV   | 0.1707      | 2.26748e4    | 2156.35889   | 100.0000 |

Totals : 2.26748e4 2156.35889

Signal 4: DAD1 D, Sig=230,16 Ref=off

| Peak # | RetTime [min] | Type | Width [min] | Area [mAU*s] | Height [mAU] | Area %   |
|--------|---------------|------|-------------|--------------|--------------|----------|
| 1      | 15.579        | BV   | 0.1420      | 2.06525e4    | 2361.59888   | 100.0000 |

Totals : 2.06525e4 2361.59888

Signal 5: DAD1 E, Sig=280,16 Ref=off

| Peak # | RetTime [min] | Type | Width [min] | Area [mAU*s] | Height [mAU] | Area %   |
|--------|---------------|------|-------------|--------------|--------------|----------|
| 1      | 15.579        | BV   | 0.1096      | 1.50498e4    | 2206.14380   | 100.0000 |

Totals : 1.50498e4 2206.14380

**S50**

Sample Name: run1

**HPLC Traces of Compound 42**

Signal 6: DAD1 F, Sig=280,16 Ref=off

| Peak # | RetTime [min] | Type | Width [min] | Area [mAU*s] | Height [mAU] | Area %   |
|--------|---------------|------|-------------|--------------|--------------|----------|
| 1      | 15.579        | BV   | 0.1096      | 1.50498e4    | 2206.14380   | 100.0000 |

Totals : 1.50498e4 2206.14380

Signal 7: DAD1 G, Sig=300,16 Ref=off

| Peak # | RetTime [min] | Type | Width [min] | Area [mAU*s] | Height [mAU] | Area %   |
|--------|---------------|------|-------------|--------------|--------------|----------|
| 1      | 15.578        | BB   | 0.0994      | 1.03041e4    | 1637.69092   | 100.0000 |

Totals : 1.03041e4 1637.69092

Signal 8: DAD1 H, Sig=320,16 Ref=off

| Peak # | RetTime [min] | Type | Width [min] | Area [mAU*s] | Height [mAU] | Area %   |
|--------|---------------|------|-------------|--------------|--------------|----------|
| 1      | 15.578        | BB   | 0.0888      | 1155.64270   | 195.93292    | 100.0000 |

Totals : 1155.64270 195.93292

=====  
\*\*\* End of Report \*\*\*

# HRMS of Compound 42

C:\Xcalibur\...ICSG-VII-29\_130327182827

3/27/2013 6:54:00 PM

CSG-VII-29

CSG-VII-29\_130327182827 #2 RT: 0.01 AV: 1 NL: 8.89E7  
T: FTMS + p ESI Full ms [150.00-1000.00]

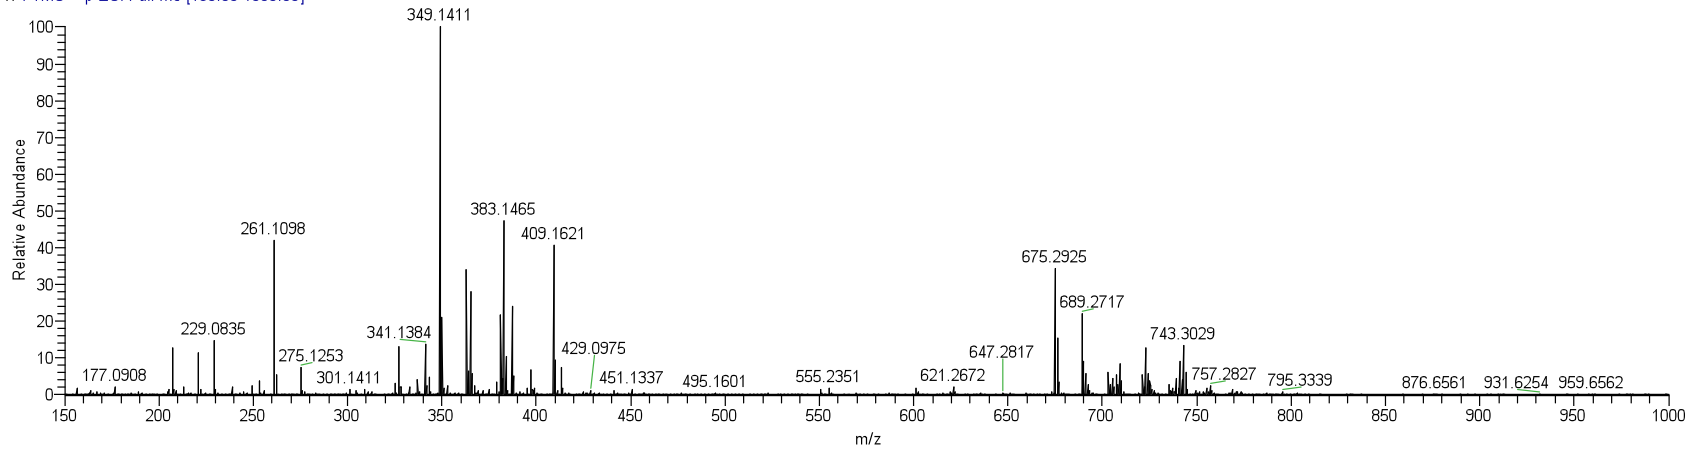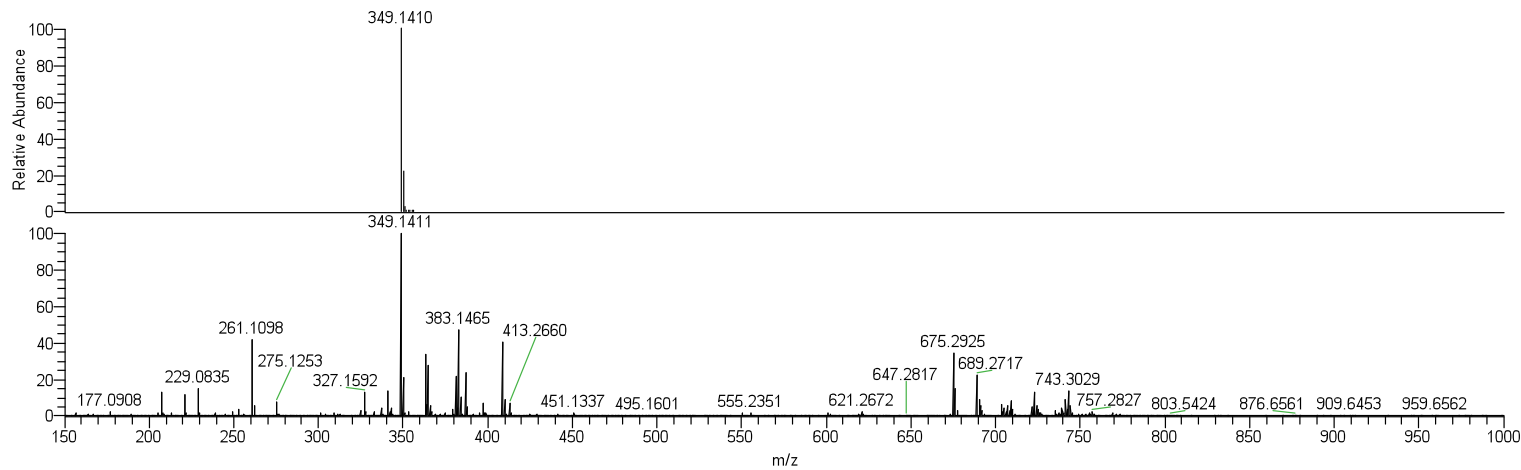

NL:  
7.97E5  
C<sub>20</sub>H<sub>22</sub>O<sub>4</sub>Na:  
C<sub>20</sub>H<sub>22</sub>O<sub>4</sub>Na<sub>1</sub>  
pa Chrg 1

NL:  
8.89E7  
CSG-VII-  
29\_130327182827#2  
RT: 0.01 AV: 1 T:  
FTMS + p ESI Full ms  
[150.00-1000.00]

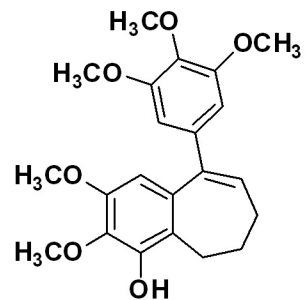

43

7.26  
 6.50  
 6.40  
 6.39  
 6.37  
 6.18  
 5.94  
 3.95  
 3.86  
 3.81  
 3.70  
 2.68  
 2.67  
 2.66  
 2.15  
 2.14  
 2.12  
 2.11  
 2.09  
 1.98  
 1.96  
 1.95  
 1.93  
 1.64

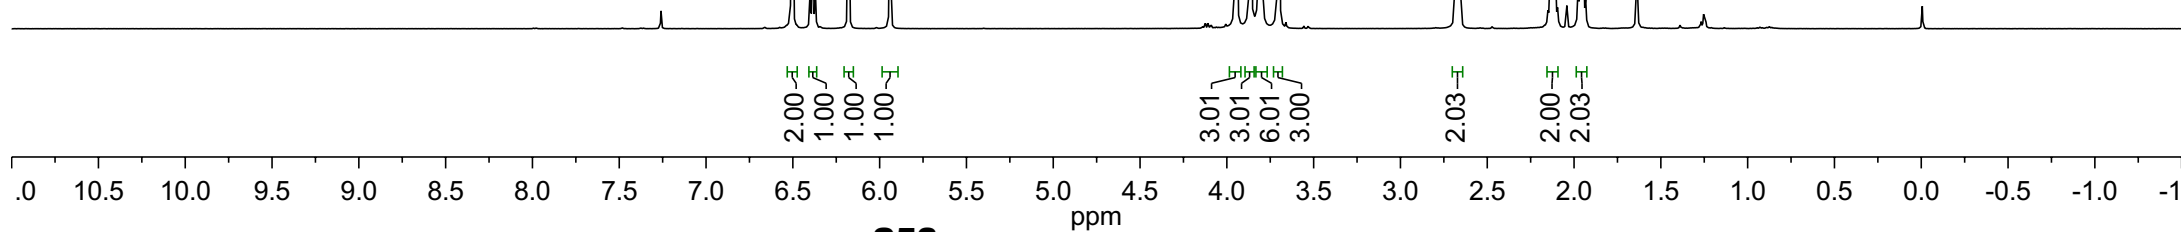

S53

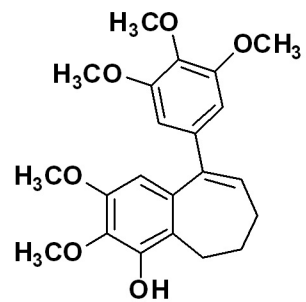

43

153.00  
149.82  
146.33  
142.80  
138.06  
137.46  
136.25  
134.31  
128.46  
121.39

105.32  
105.06

77.41  
77.16  
76.91

61.08  
61.06  
56.29  
56.06

34.29

25.81  
23.38

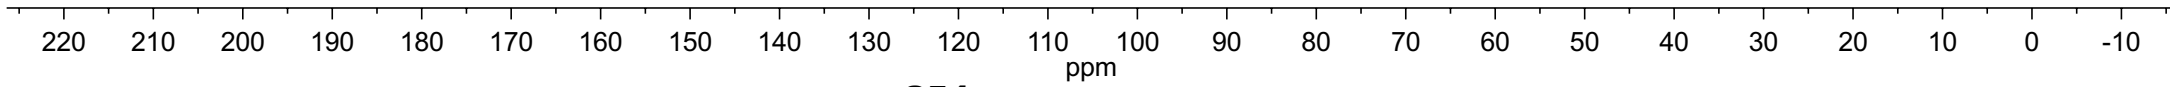

S54

Sample Name: run1

**HPLC Traces of Compound 43**

=====  
Acq. Operator : Christine  
Acq. Instrument : Instrument 1 Location : -  
Injection Date : 3/25/2013 6:42:00 PM  
Acq. Method : C:\CHEM32\1\METHODS\MASTERMETHOD.M  
Last changed : 3/25/2013 5:31:33 PM by Christine  
Analysis Method : C:\CHEM32\1\DATA\CHRISTINE\LD\_1\_65\_1000009.D\DA.M (MASTERMETHOD.M)  
Last changed : 3/25/2013 7:42:29 PM by Christine

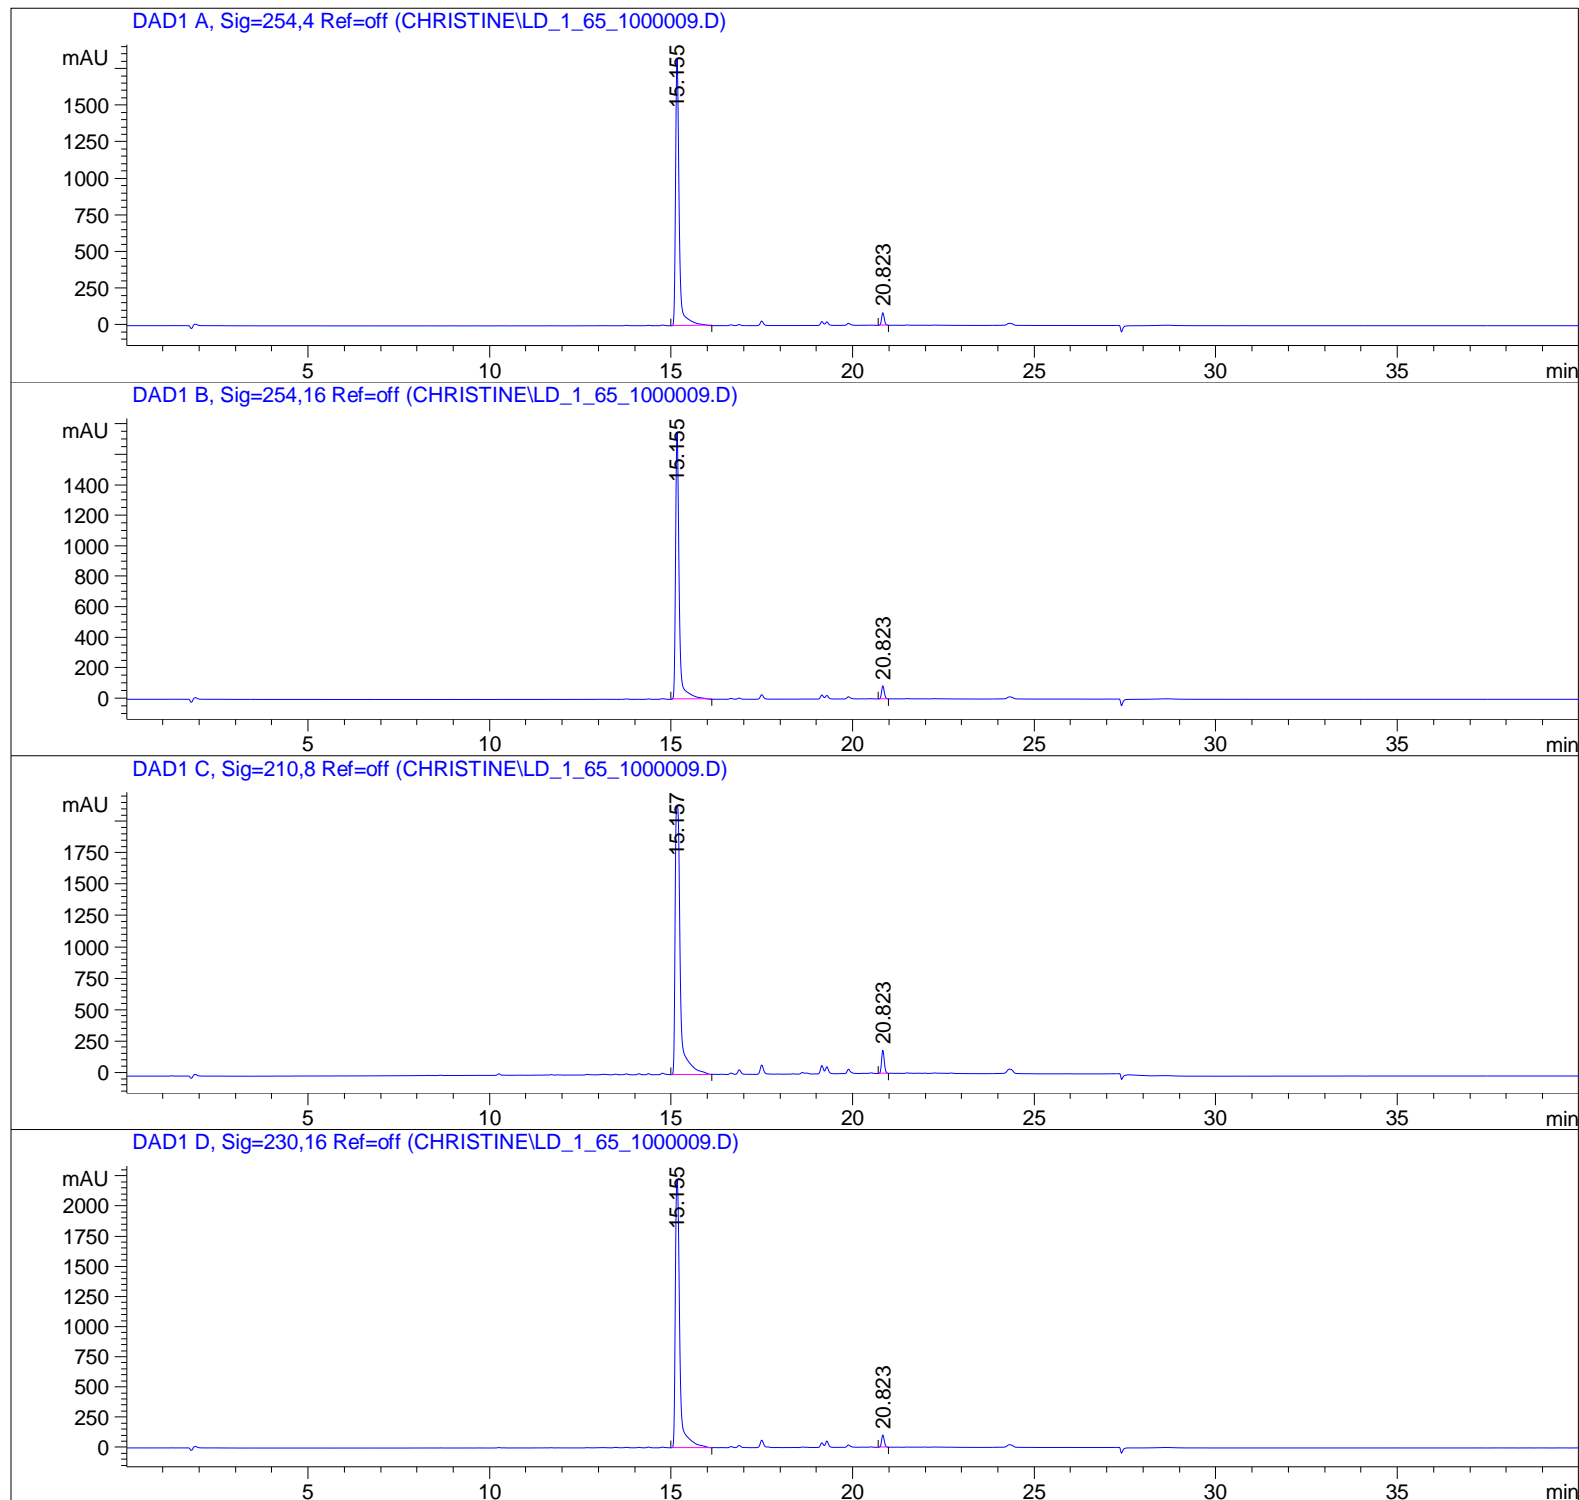**S55**

Sample Name: run1

### HPLC Traces of Compound 43

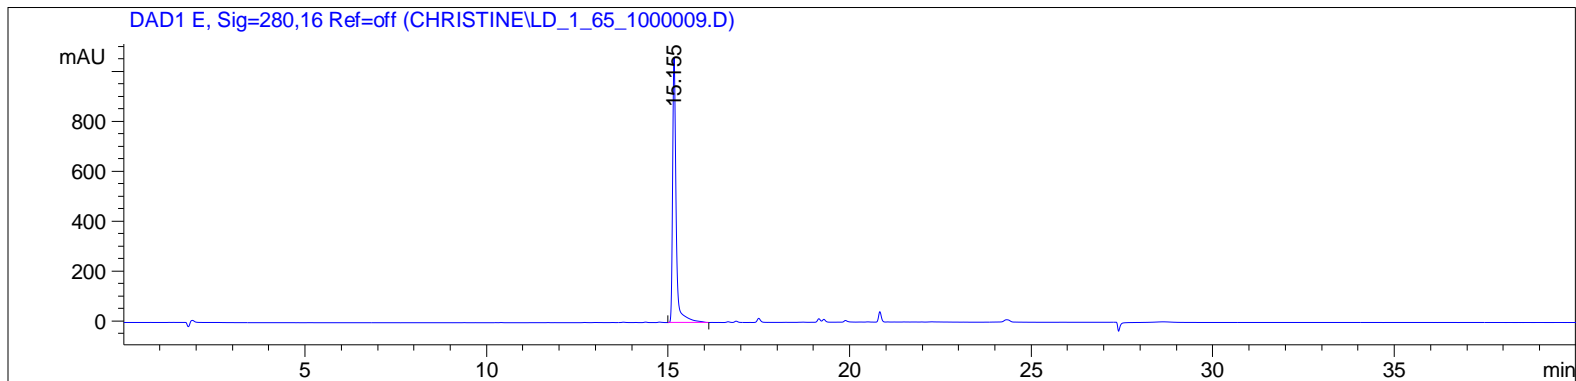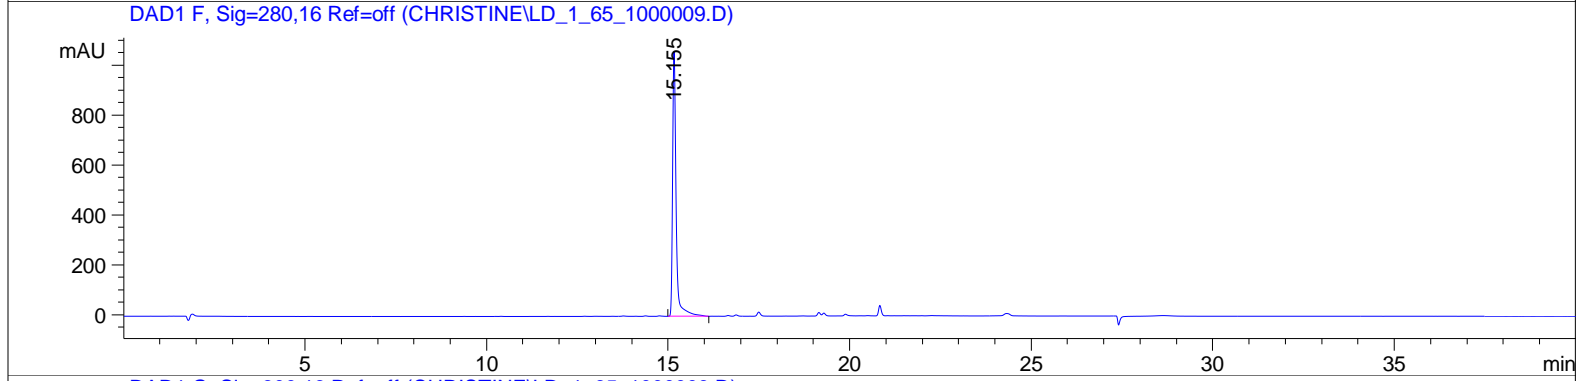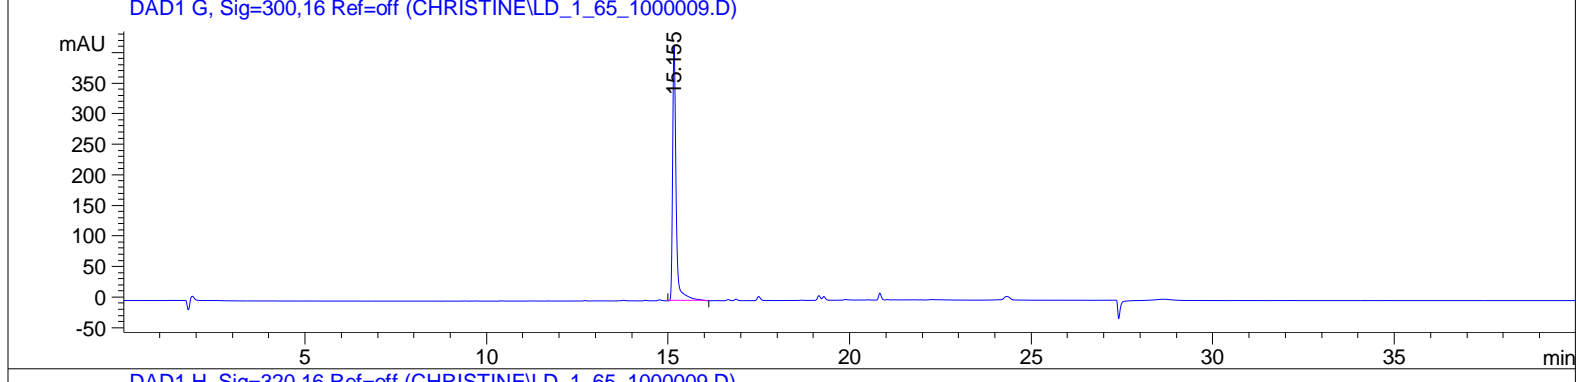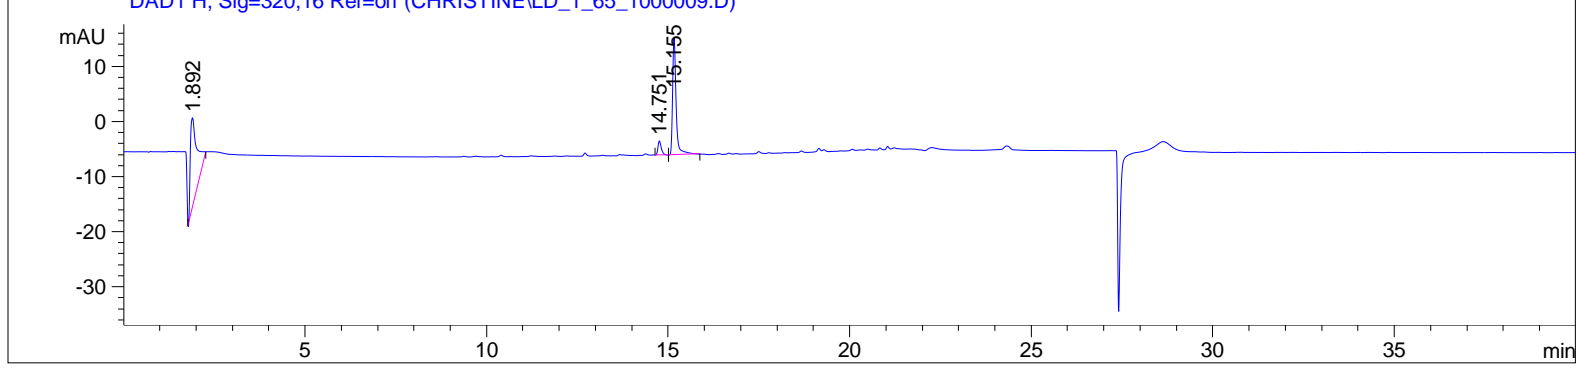

=====  
Area Percent Report  
=====

Sorted By : Signal  
Multiplier : 1.0000  
Dilution : 1.0000  
Use Multiplier & Dilution Factor with ISTDs

**S56**



Sample Name: run1

**HPLC Traces of Compound 43**

Signal 1: DAD1 A, Sig=254,4 Ref=off

| Peak # | RetTime [min] | Type | Width [min] | Area [mAU*s] | Height [mAU] | Area %  |
|--------|---------------|------|-------------|--------------|--------------|---------|
| 1      | 15.155        | BB   | 0.1035      | 1.27558e4    | 1826.01721   | 96.6533 |
| 2      | 20.823        | BB   | 0.0802      | 441.68518    | 85.54213     | 3.3467  |

Totals :                                   1.31975e4  1911.55934

Signal 2: DAD1 B, Sig=254,16 Ref=off

| Peak # | RetTime [min] | Type | Width [min] | Area [mAU*s] | Height [mAU] | Area %  |
|--------|---------------|------|-------------|--------------|--------------|---------|
| 1      | 15.155        | BB   | 0.1029      | 1.21415e4    | 1751.75439   | 96.5072 |
| 2      | 20.823        | BB   | 0.0782      | 439.43024    | 85.11578     | 3.4928  |

Totals :                                   1.25809e4  1836.87017

Signal 3: DAD1 C, Sig=210,8 Ref=off

| Peak # | RetTime [min] | Type | Width [min] | Area [mAU*s] | Height [mAU] | Area %  |
|--------|---------------|------|-------------|--------------|--------------|---------|
| 1      | 15.157        | BV   | 0.1538      | 2.12365e4    | 2140.21191   | 95.6725 |
| 2      | 20.823        | BV   | 0.0805      | 960.57239    | 185.28012    | 4.3275  |

Totals :                                   2.21971e4  2325.49203

Signal 4: DAD1 D, Sig=230,16 Ref=off

| Peak # | RetTime [min] | Type | Width [min] | Area [mAU*s] | Height [mAU] | Area %  |
|--------|---------------|------|-------------|--------------|--------------|---------|
| 1      | 15.155        | BV   | 0.1315      | 1.89474e4    | 2221.88965   | 97.3141 |
| 2      | 20.823        | BB   | 0.0802      | 522.95447    | 101.36359    | 2.6859  |

Totals :                                   1.94703e4  2323.25323

**S57**

Sample Name: run1

**HPLC Traces of Compound 43**

Signal 5: DAD1 E, Sig=280,16 Ref=off

| Peak # | RetTime [min] | Type | Width [min] | Area [mAU*s] | Height [mAU] | Area %   |
|--------|---------------|------|-------------|--------------|--------------|----------|
| 1      | 15.155        | BB   | 0.1009      | 7177.51318   | 1061.98120   | 100.0000 |

Totals : 7177.51318 1061.98120

Signal 6: DAD1 F, Sig=280,16 Ref=off

| Peak # | RetTime [min] | Type | Width [min] | Area [mAU*s] | Height [mAU] | Area %   |
|--------|---------------|------|-------------|--------------|--------------|----------|
| 1      | 15.155        | BB   | 0.1009      | 7177.51318   | 1061.98120   | 100.0000 |

Totals : 7177.51318 1061.98120

Signal 7: DAD1 G, Sig=300,16 Ref=off

| Peak # | RetTime [min] | Type | Width [min] | Area [mAU*s] | Height [mAU] | Area %   |
|--------|---------------|------|-------------|--------------|--------------|----------|
| 1      | 15.155        | BB   | 0.1006      | 2817.50952   | 418.16830    | 100.0000 |

Totals : 2817.50952 418.16830

Signal 8: DAD1 H, Sig=320,16 Ref=off

| Peak # | RetTime [min] | Type | Width [min] | Area [mAU*s] | Height [mAU] | Area %  |
|--------|---------------|------|-------------|--------------|--------------|---------|
| 1      | 1.892         | BB   | 0.1832      | 212.84036    | 16.64317     | 57.0213 |
| 2      | 14.751        | BB   | 0.0976      | 16.61544     | 2.56333      | 4.4514  |
| 3      | 15.155        | BB   | 0.1010      | 143.80884    | 21.22739     | 38.5273 |

Totals : 373.26464 40.43389

=====  
\*\*\* End of Report \*\*\*

# HRMS of Compound 43

C:\Xcalibur\...LD-I-65-1\_130327121414

3/27/2013 4:53:38 PM

LD-I-65-1

LD-I-65-1\_130327121414 #11 RT: 0.08 AV: 1 NL: 1.25E8  
T: FTMS + p ESI Full ms [150.00-1000.00]

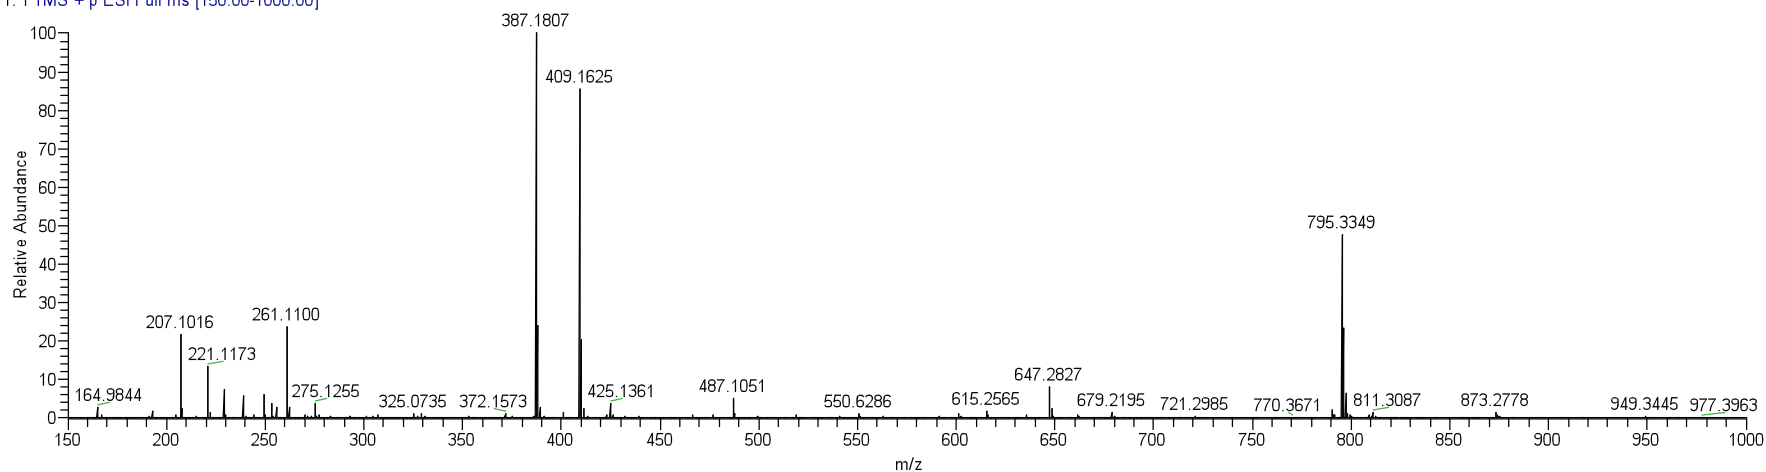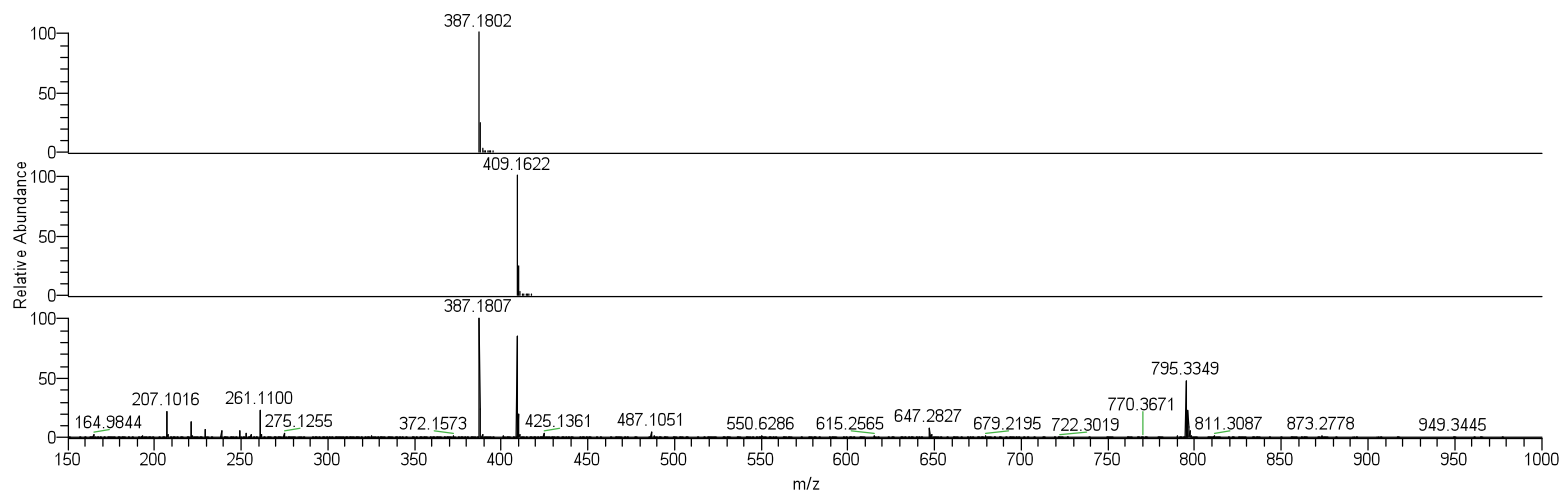

NL:  
7.75E5  
C<sub>22</sub>H<sub>27</sub>O<sub>6</sub>  
C<sub>22</sub>H<sub>27</sub>O<sub>6</sub>  
pa Chrg 1

NL:  
7.75E5  
C<sub>22</sub>H<sub>26</sub>O<sub>6</sub>Na:  
C<sub>22</sub>H<sub>26</sub>O<sub>6</sub>Na<sub>1</sub>  
pa Chrg 1

NL:  
1.25E8  
LD-I-65-  
1\_130327121414#11 RT:  
0.08 AV: 1 T: FTMS + p  
ESI Full ms  
[150.00-1000.00]

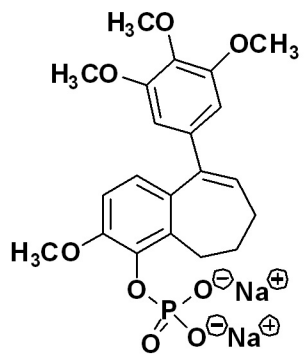

44

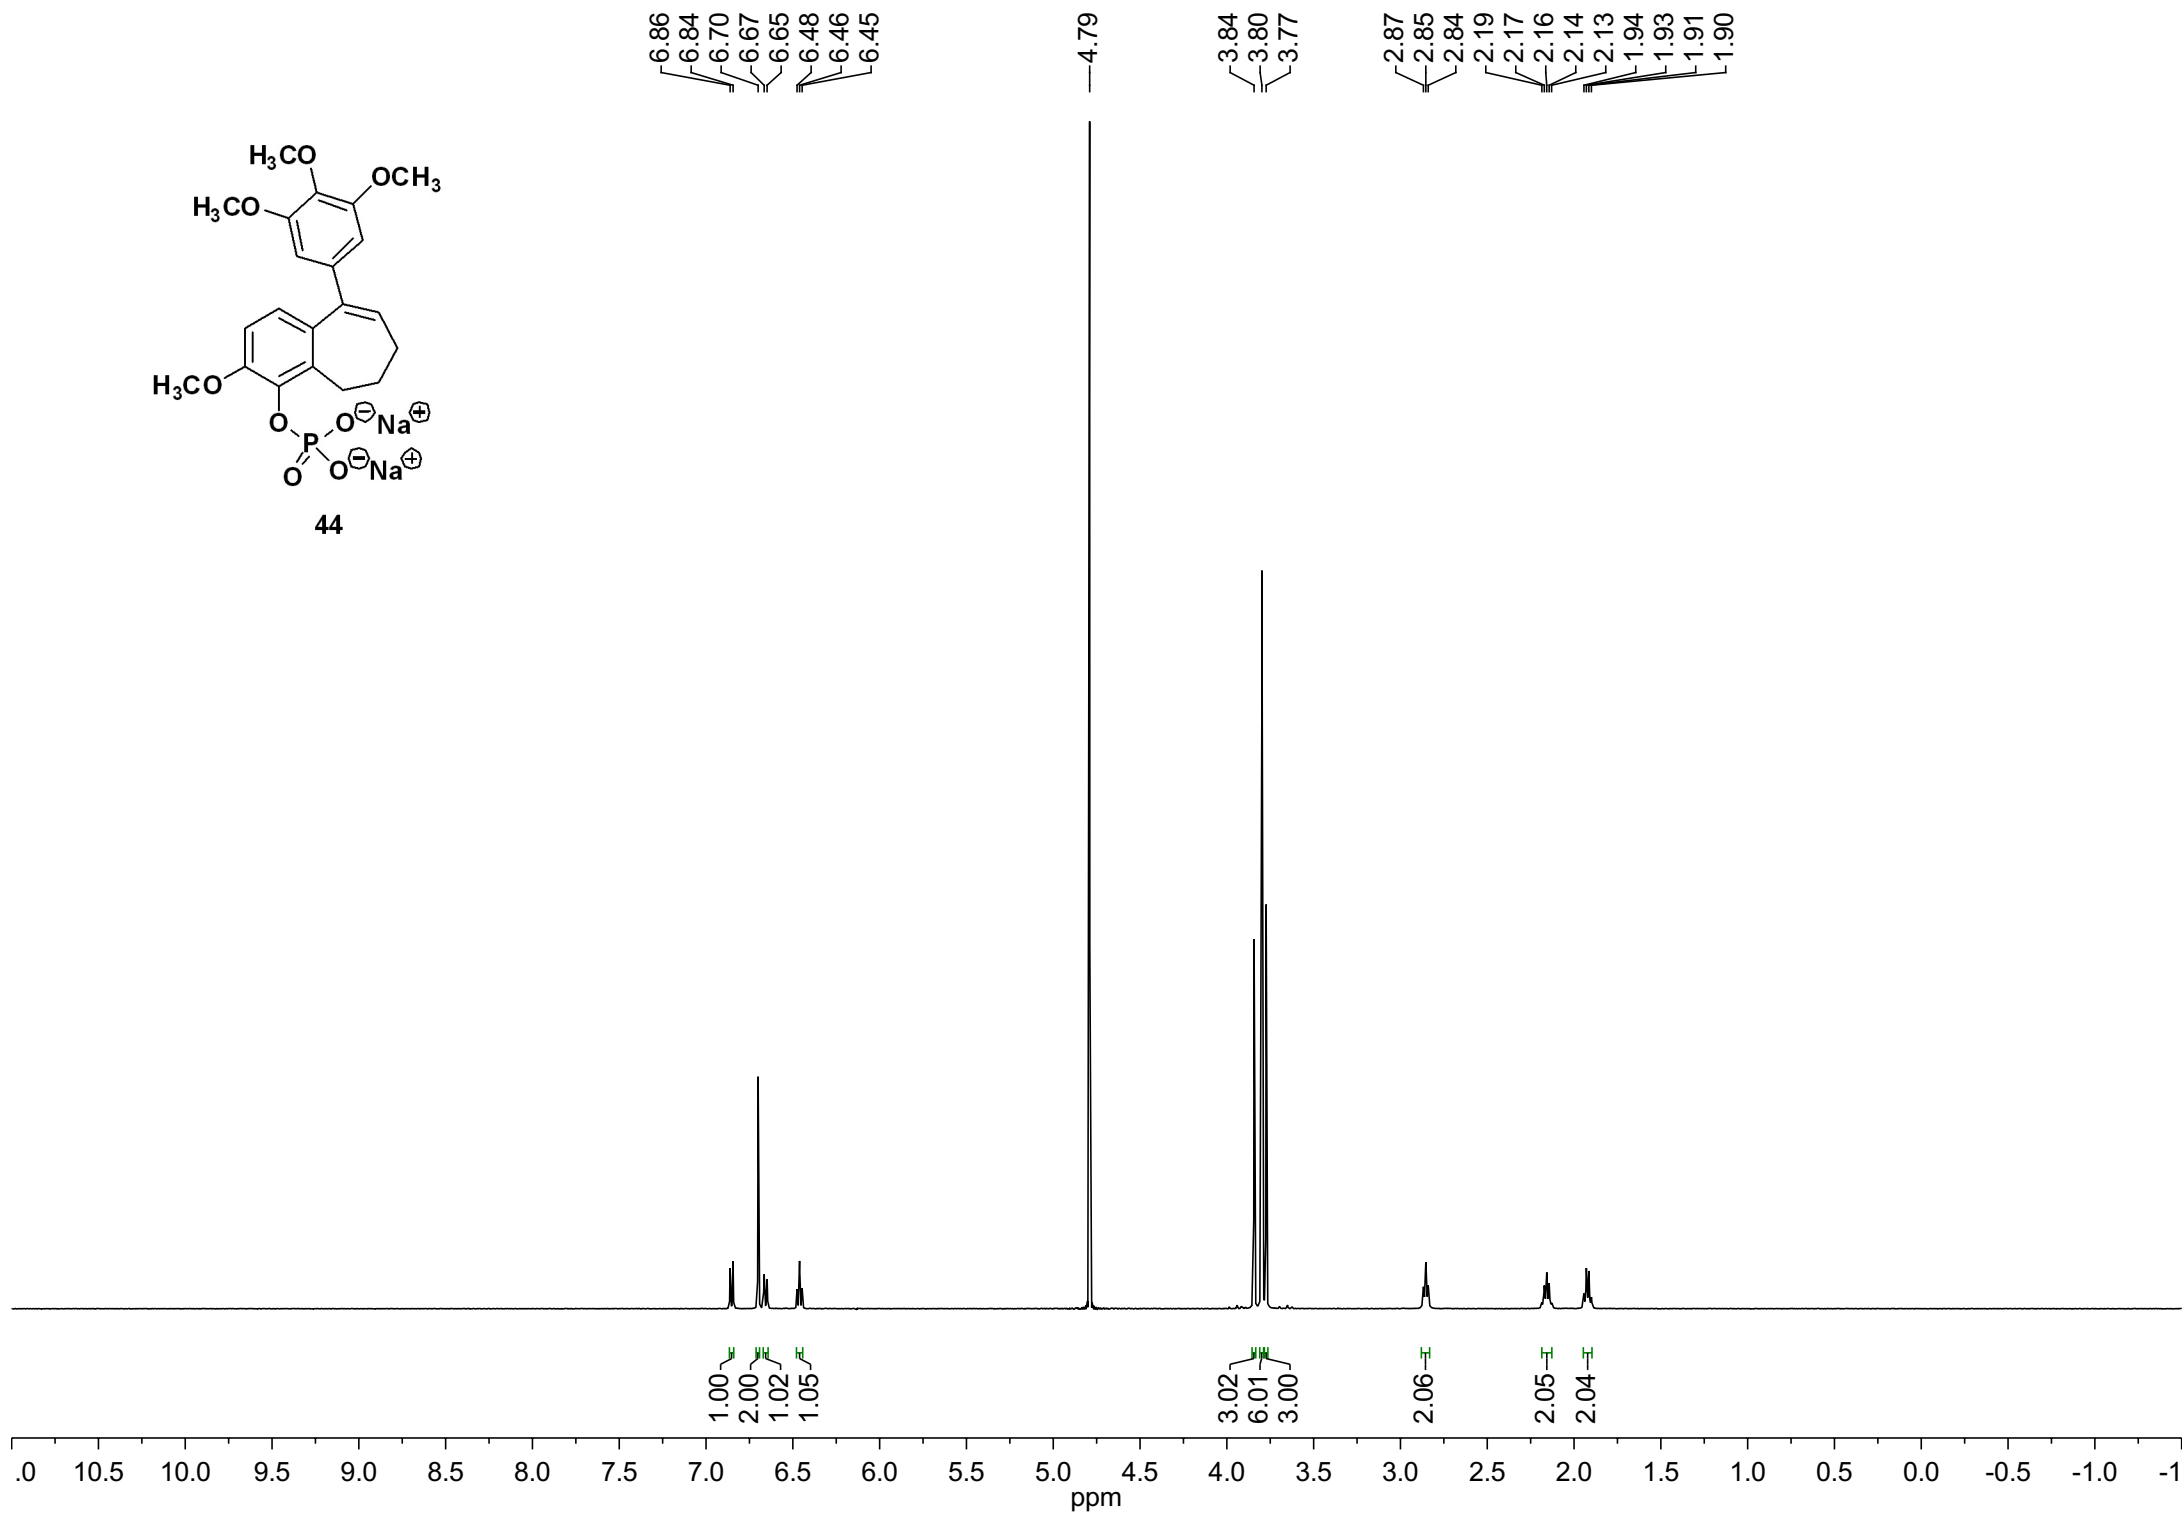

S60

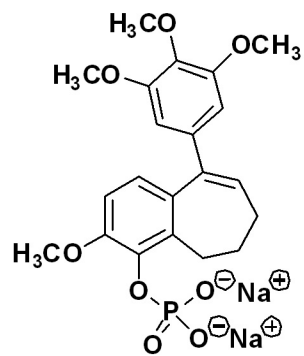

44

152.14  
150.99  
141.75  
140.49  
139.36  
136.49  
135.85  
133.35  
128.68  
124.08

109.42  
105.48

60.89  
55.93  
55.53

33.32  
25.09  
24.60

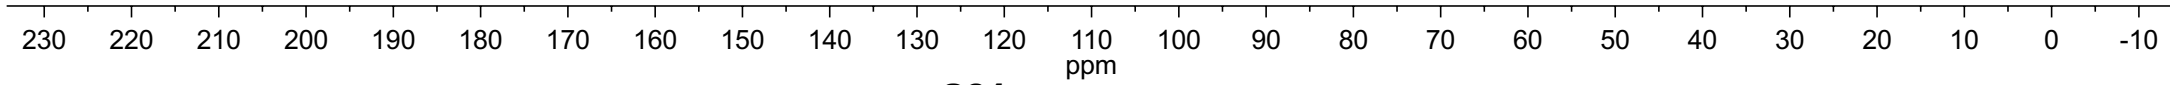

S61

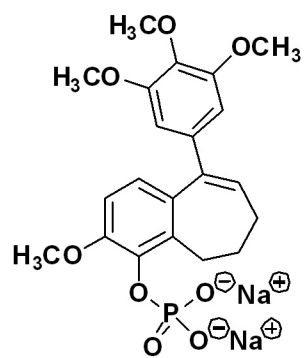

44

—2.95

190 180 170 160 150 140 130 120 110 100 90 80 70 60 50 40 30 20 10 0 -10 -20 -30 -40

S62

ppm

Sample Name: RT-6-11-3

**HPLC Traces of Compound 44**

=====  
Acq. Operator : RajT.  
Acq. Instrument : Instrument 1 Location : -  
Injection Date : 5/1/2012 4:39:02 AM  
Acq. Method : C:\CHEM32\1\METHODS\MASTERMETHOD.M  
Last changed : 5/1/2012 4:07:09 AM by RajT.  
Analysis Method : C:\CHEM32\1\METHODS\MASTERMETHOD.M  
Last changed : 3/28/2012 11:50:33 AM by Erica P  
Sample Info : RT-6-11-3  
10 uL

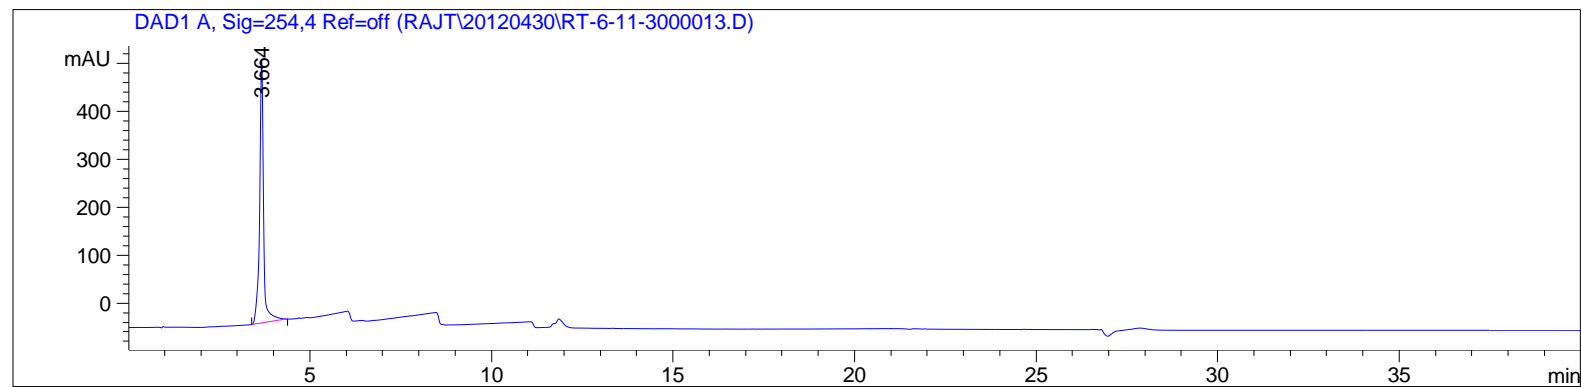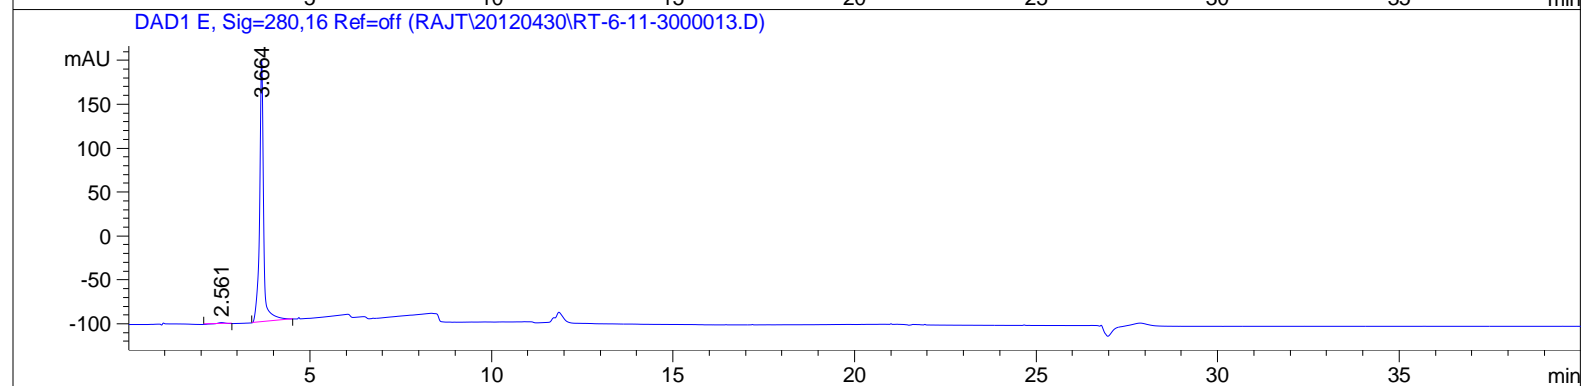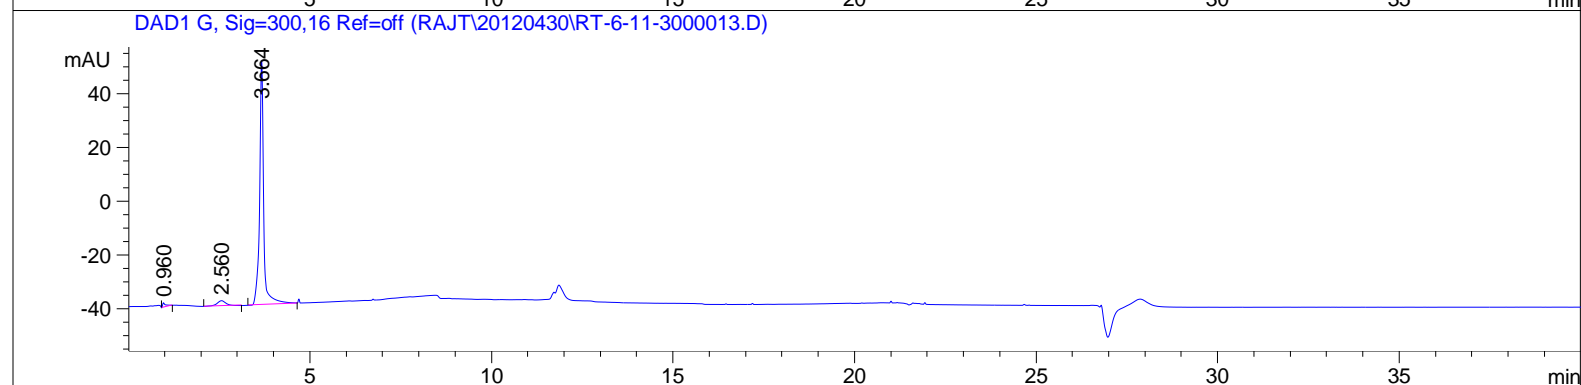**S63**

Sample Name: RT-6-11-3

**HPLC Traces of Compound 44**=====  
Area Percent Report  
=====

Sorted By : Signal  
Multiplier : 1.0000  
Dilution : 1.0000  
Use Multiplier & Dilution Factor with ISTDs

Signal 1: DAD1 A, Sig=254,4 Ref=off

| Peak # | RetTime [min] | Type | Width [min] | Area [mAU*s] | Height [mAU] | Area %   |
|--------|---------------|------|-------------|--------------|--------------|----------|
| 1      | 3.664         | BB   | 0.1124      | 4163.92969   | 549.24536    | 100.0000 |

Totals : 4163.92969 549.24536

Signal 2: DAD1 E, Sig=280,16 Ref=off

| Peak # | RetTime [min] | Type | Width [min] | Area [mAU*s] | Height [mAU] | Area %  |
|--------|---------------|------|-------------|--------------|--------------|---------|
| 1      | 2.561         | BB   | 0.2526      | 25.22306     | 1.45211      | 1.0891  |
| 2      | 3.664         | BB   | 0.1134      | 2290.73706   | 298.77597    | 98.9109 |

Totals : 2315.96012 300.22808

Signal 3: DAD1 G, Sig=300,16 Ref=off

| Peak # | RetTime [min] | Type | Width [min] | Area [mAU*s] | Height [mAU] | Area %  |
|--------|---------------|------|-------------|--------------|--------------|---------|
| 1      | 0.960         | BB   | 0.0865      | 10.72702     | 1.68029      | 1.4187  |
| 2      | 2.560         | BB   | 0.2635      | 34.55238     | 1.96197      | 4.5697  |
| 3      | 3.664         | BV   | 0.1152      | 710.83453    | 90.96315     | 94.0116 |

Totals : 756.11394 94.60541

=====  
\*\*\* End of Report \*\*\***S64**



# HRMS of Compound 44

C:\Xcalibur\...IRT-6-29\_130328102846

3/28/2013 10:28:47 AM

RT-6-29

RT-6-29\_130328102846 #7 RT: 0.05 AV: 1 NL: 1.22E7  
T: FTMS + p ESI Full ms [100.00-1000.00]

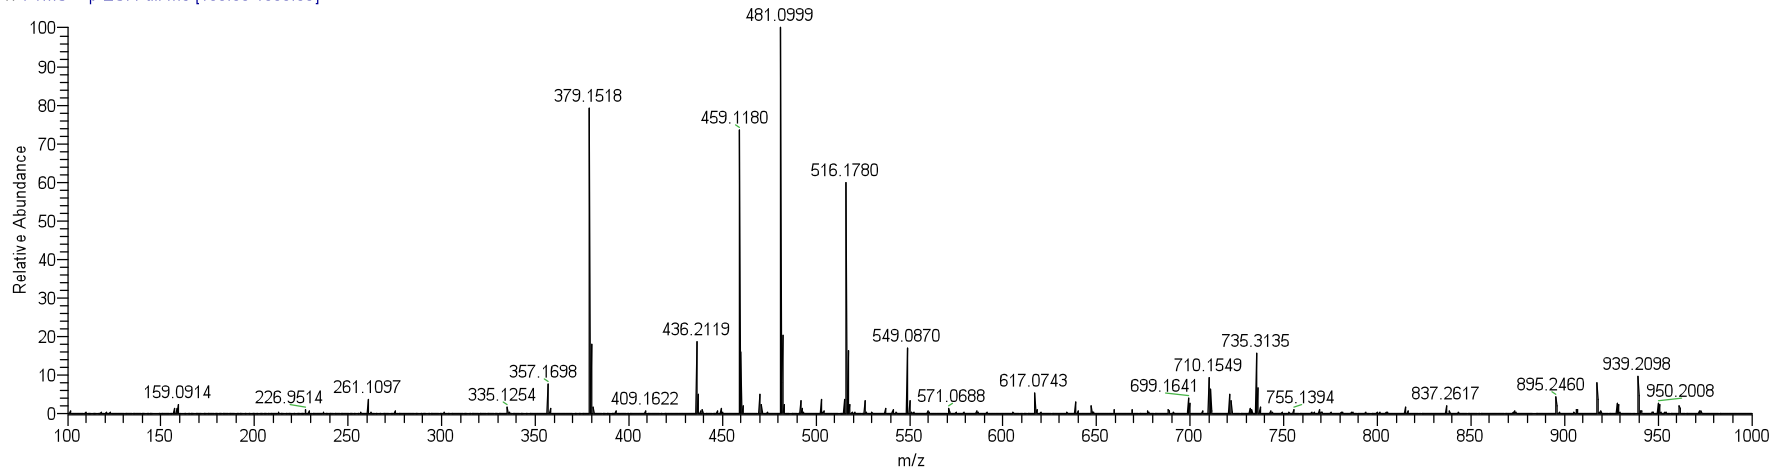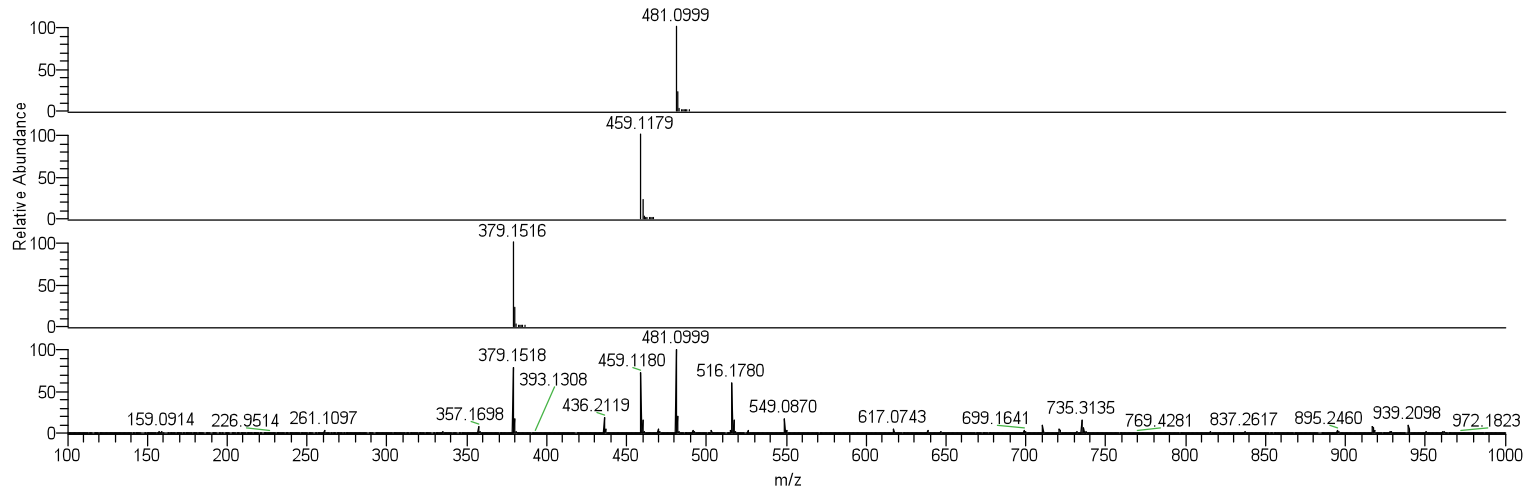

NL:  
7.80E5  
C<sub>21</sub>H<sub>24</sub>O<sub>8</sub>Na<sub>2</sub>P:  
C<sub>21</sub>H<sub>24</sub>O<sub>8</sub>Na<sub>2</sub>P<sub>1</sub>  
pa Chrg 1  
NL:  
7.80E5  
C<sub>21</sub>H<sub>25</sub>O<sub>8</sub>NaP:  
C<sub>21</sub>H<sub>25</sub>O<sub>8</sub>Na<sub>1</sub>P<sub>1</sub>  
pa Chrg 1  
NL:  
7.86E5  
C<sub>21</sub>H<sub>24</sub>O<sub>5</sub>Na:  
C<sub>21</sub>H<sub>24</sub>O<sub>5</sub>Na<sub>1</sub>  
pa Chrg 1  
NL:  
1.22E7  
RT-6-29\_130328102846#7 RT:  
0.05 AV: 1 T: FTMS + p ESI  
Full ms [100.00-1000.00]

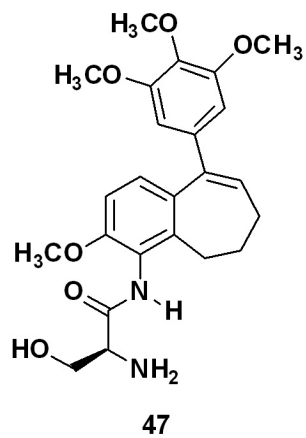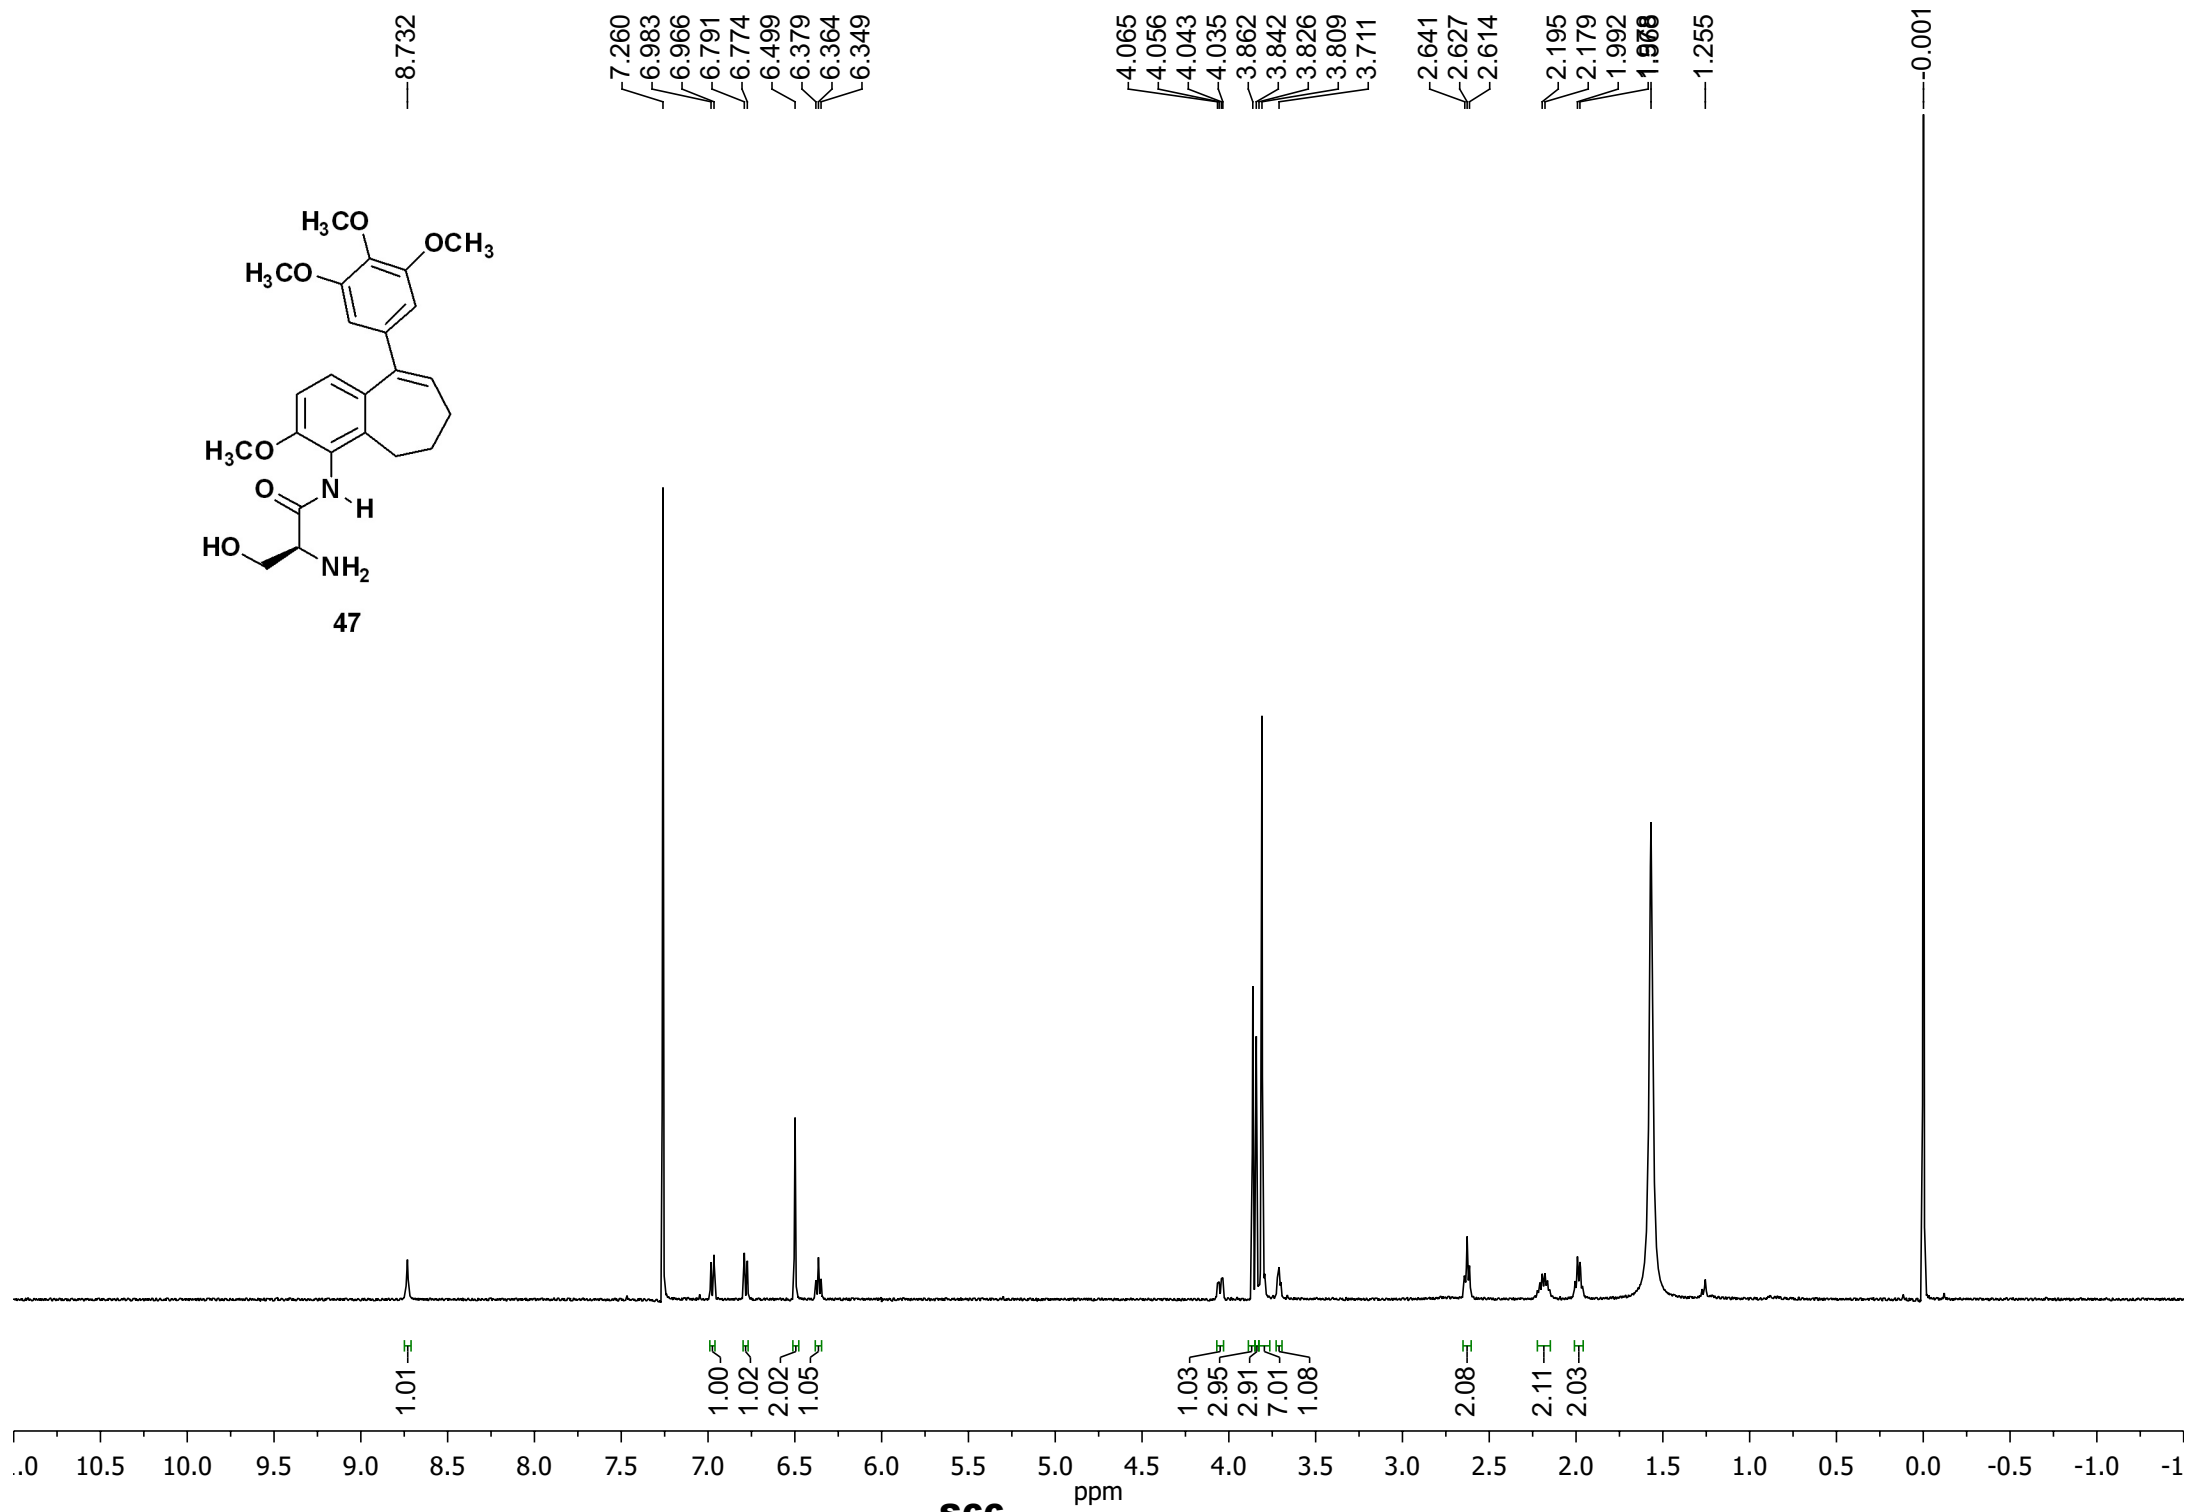

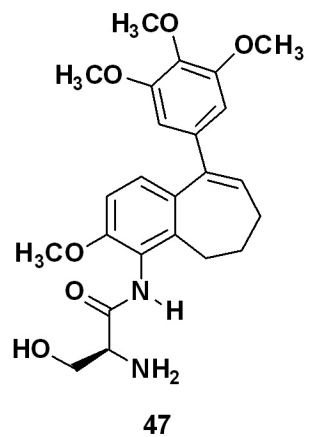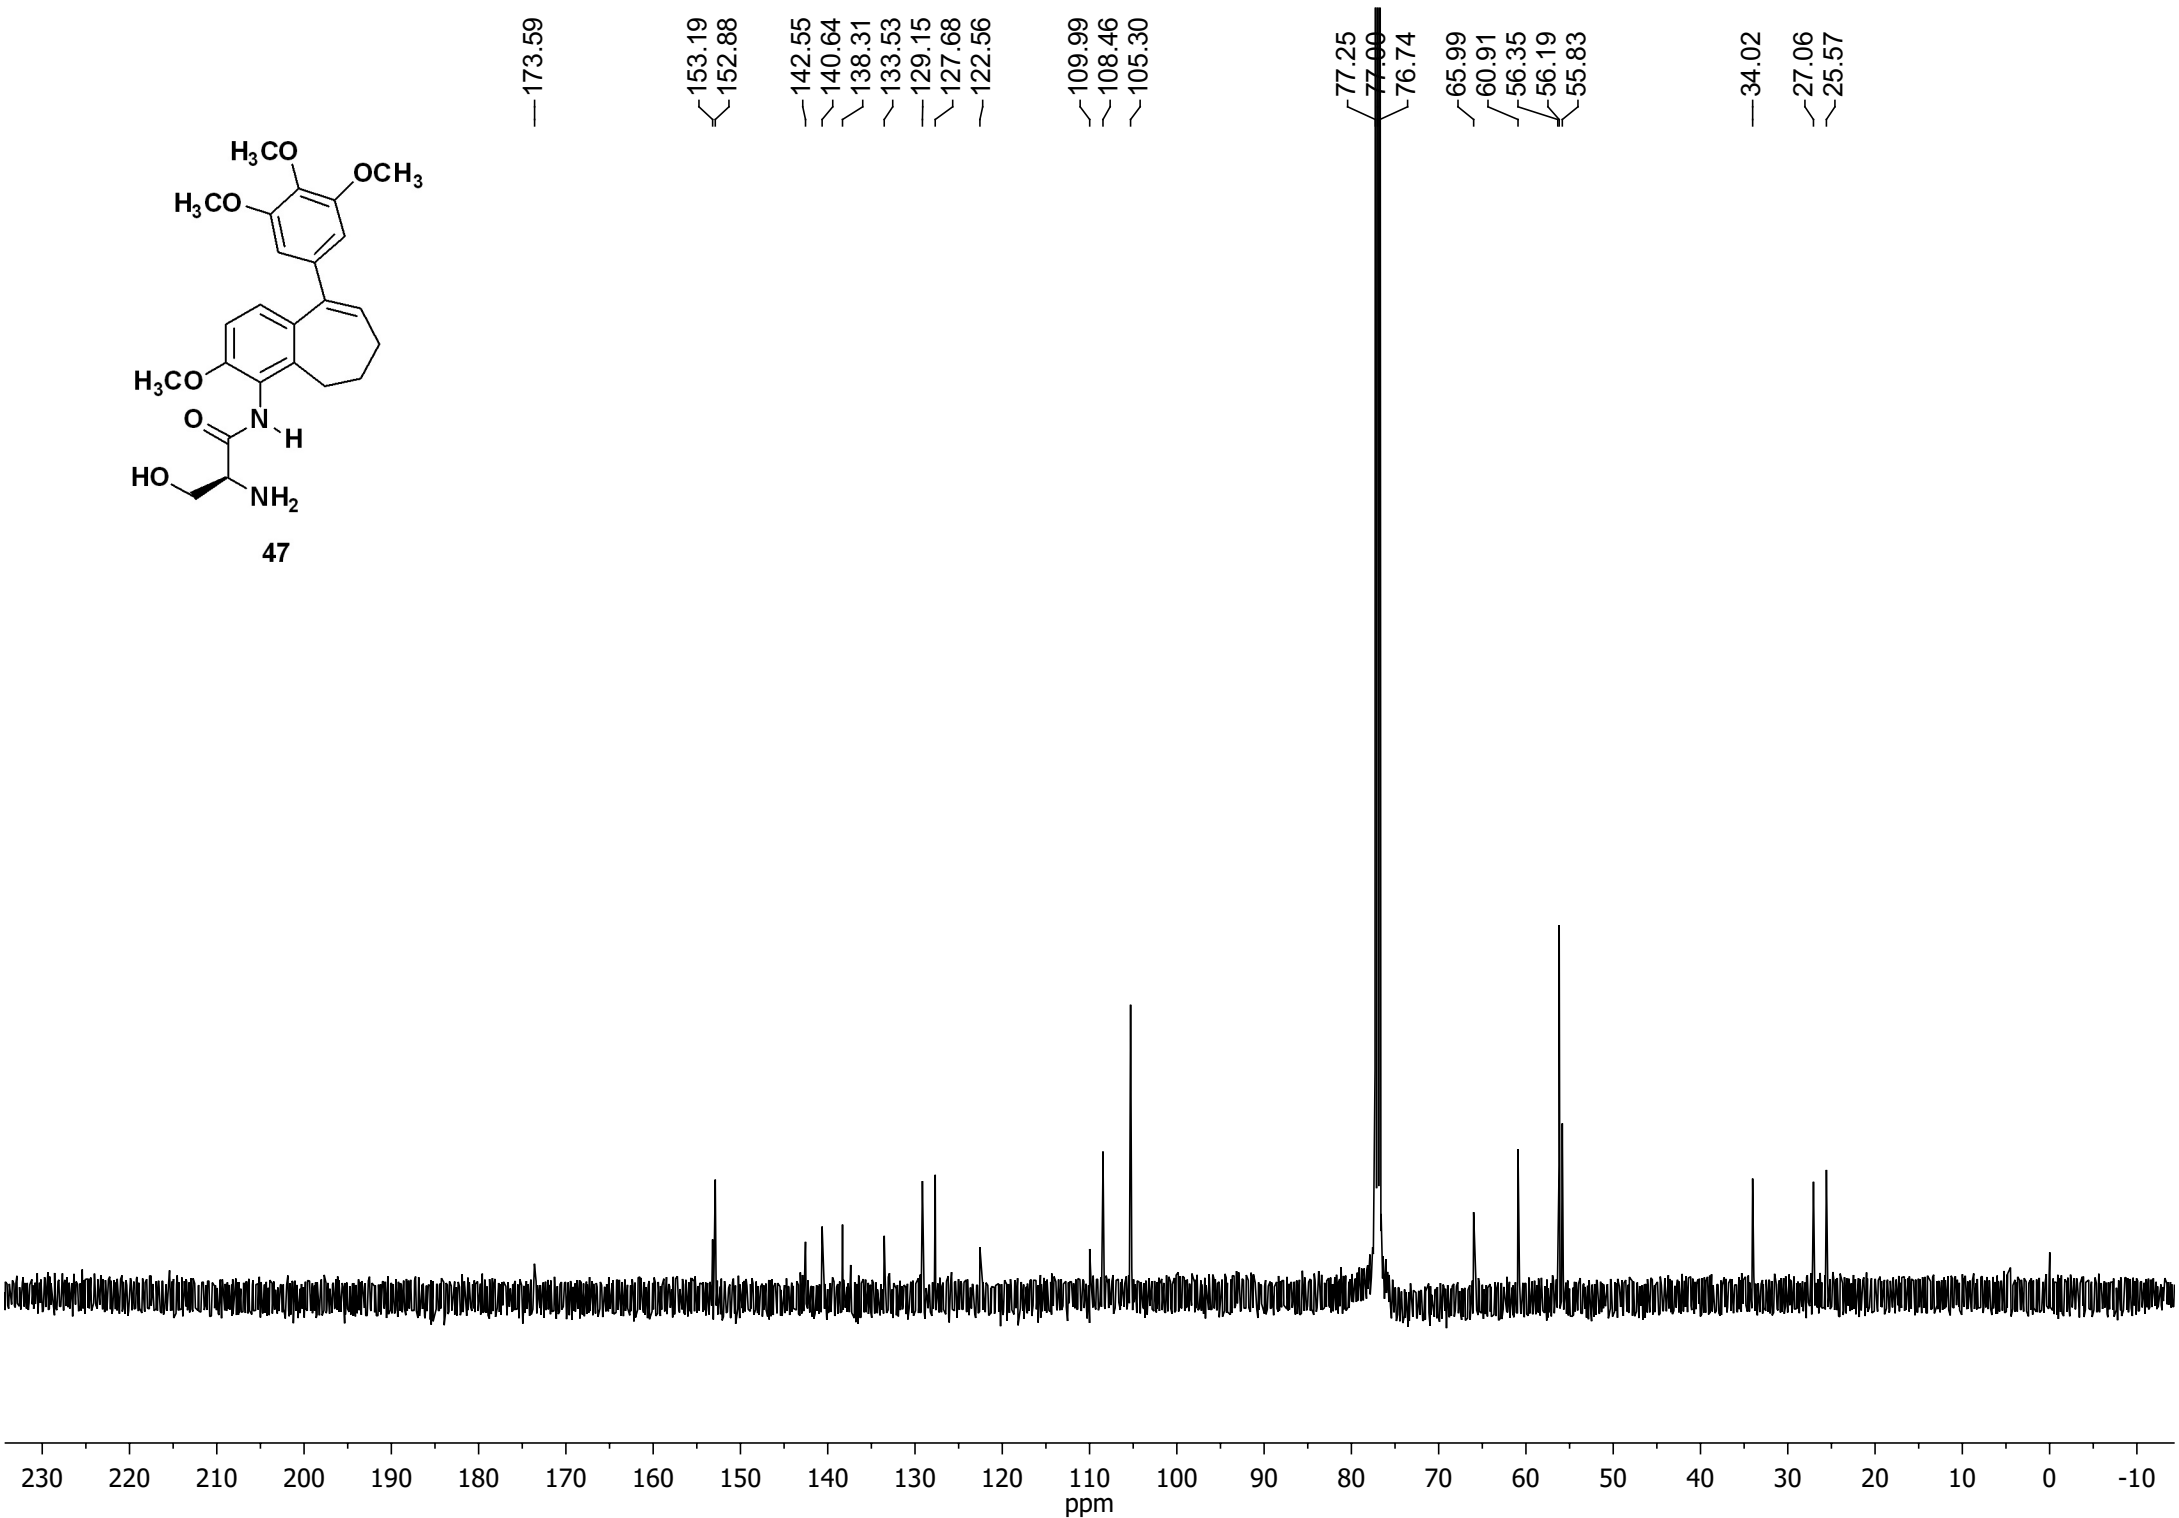

**HPLC Traces of Compound 47**

=====

Acq. Operator : ERIC LIN  
Acq. Instrument : Instrument 1 Location : -  
Injection Date : 8/26/2012 6:28:39 PM  
Acq. Method : C:\CHEM32\1\METHODS\MASTERMETHOD.M  
Last changed : 8/26/2012 6:29:45 PM by ERIC LIN  
(modified after loading)  
Analysis Method : C:\CHEM32\1\DATA\ERIC LIN\II\_005\_RUN10007.D\DA.M (MASTERMETHOD.M)  
Last changed : 8/26/2012 8:08:08 PM by ERIC LIN  
Sample Info :

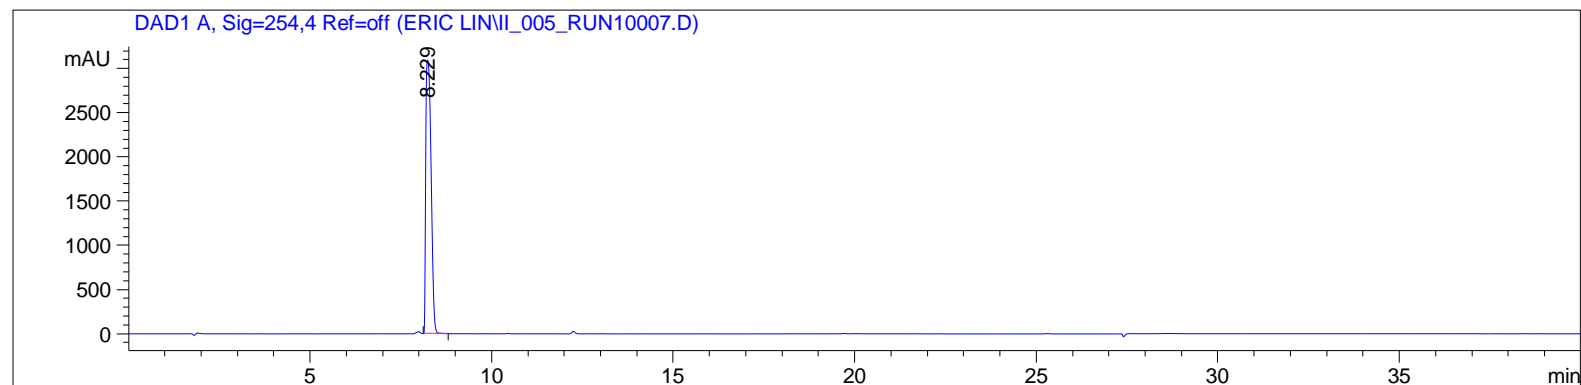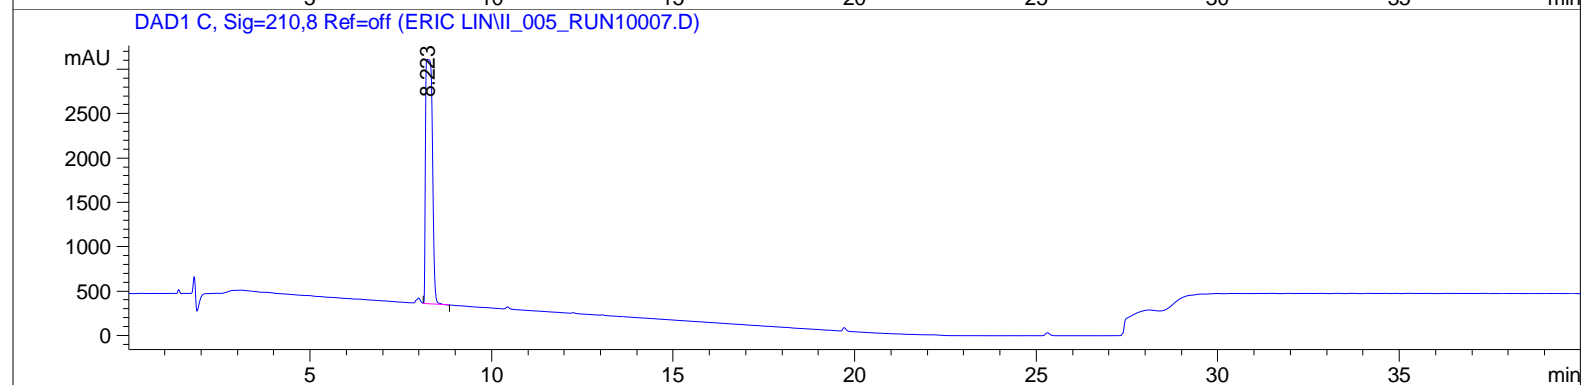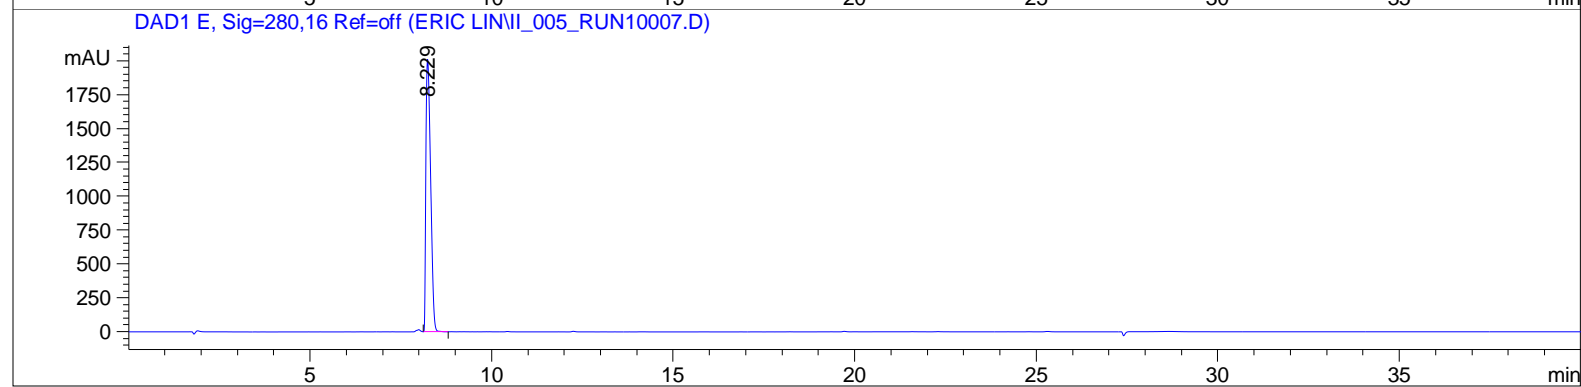**S68**

**HPLC Traces of Compound 47**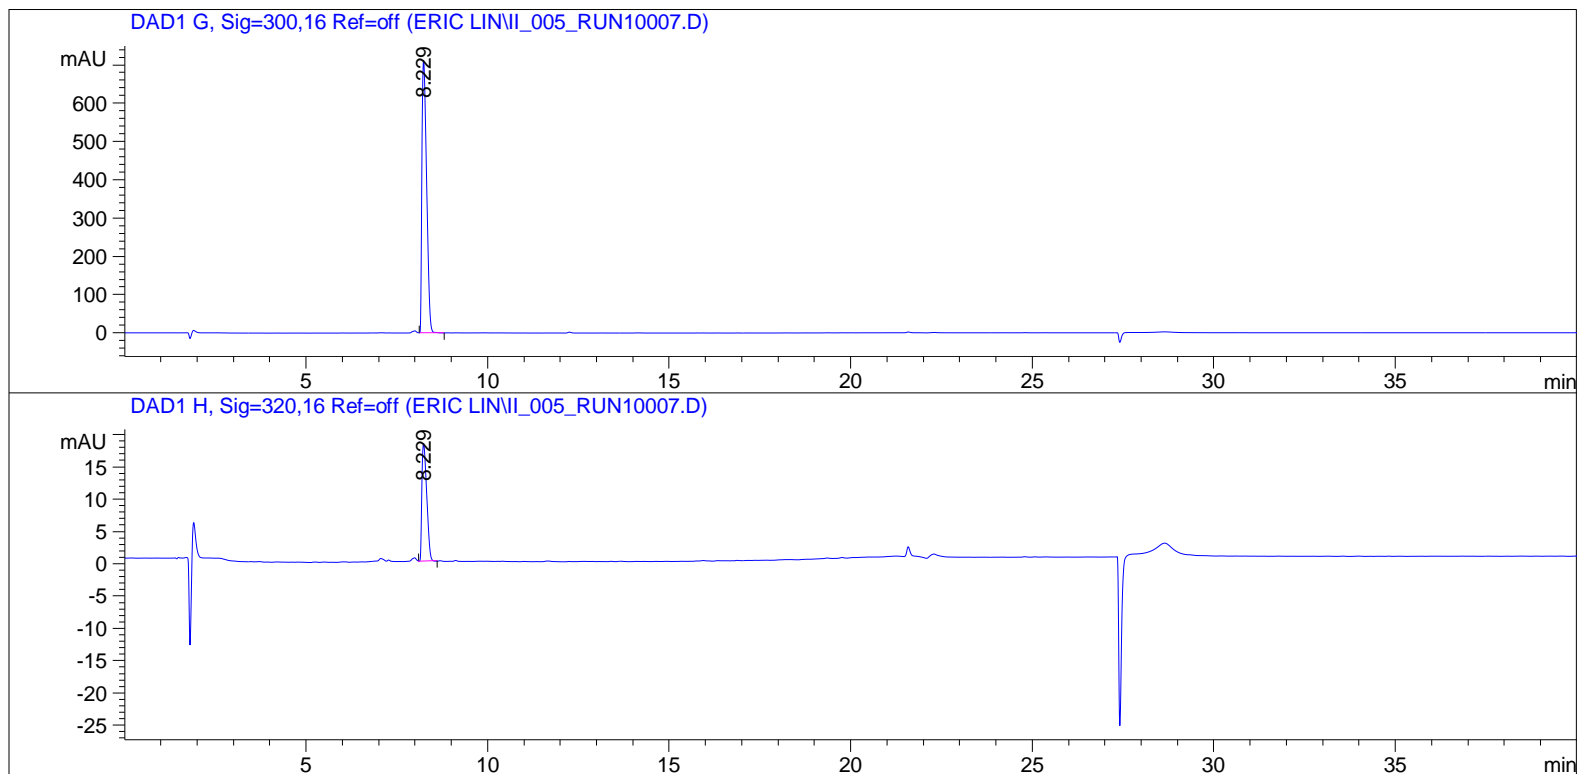

```
=====
                          Area Percent Report
=====
```

Sorted By : Signal  
Multiplier : 1.0000  
Dilution : 1.0000  
Use Multiplier & Dilution Factor with ISTDs

Signal 1: DAD1 A, Sig=254,4 Ref=off

| Peak # | RetTime [min] | Type | Width [min] | Area [mAU*s] | Height [mAU] | Area %   |
|--------|---------------|------|-------------|--------------|--------------|----------|
| 1      | 8.229         | VV   | 0.1674      | 3.16497e4    | 3092.45068   | 100.0000 |

Totals : 3.16497e4 3092.45068

Signal 2: DAD1 C, Sig=210,8 Ref=off

| Peak # | RetTime [min] | Type | Width [min] | Area [mAU*s] | Height [mAU] | Area %   |
|--------|---------------|------|-------------|--------------|--------------|----------|
| 1      | 8.223         | VV   | 0.1718      | 3.58401e4    | 2754.71655   | 100.0000 |

Totals : 3.58401e4 2754.71655

**S69**

Sample Name: CML\_II\_005\_run1

**HPLC Traces of Compound 47**

Signal 3: DAD1 E, Sig=280,16 Ref=off

| Peak # | RetTime [min] | Type | Width [min] | Area [mAU*s] | Height [mAU] | Area %   |
|--------|---------------|------|-------------|--------------|--------------|----------|
| 1      | 8.229         | VV   | 0.1462      | 1.83095e4    | 2011.87817   | 100.0000 |

Totals : 1.83095e4 2011.87817

Signal 4: DAD1 G, Sig=300,16 Ref=off

| Peak # | RetTime [min] | Type | Width [min] | Area [mAU*s] | Height [mAU] | Area %   |
|--------|---------------|------|-------------|--------------|--------------|----------|
| 1      | 8.229         | VB   | 0.1406      | 6393.18701   | 712.86285    | 100.0000 |

Totals : 6393.18701 712.86285

Signal 5: DAD1 H, Sig=320,16 Ref=off

| Peak # | RetTime [min] | Type | Width [min] | Area [mAU*s] | Height [mAU] | Area %   |
|--------|---------------|------|-------------|--------------|--------------|----------|
| 1      | 8.229         | VB   | 0.1486      | 169.87639    | 18.24767     | 100.0000 |

Totals : 169.87639 18.24767

=====  
\*\*\* End of Report \*\*\*

# HRMS of Compound 47

CML\_II\_005\_MS^2\_raw\_Orbi\_+ESI\_Orbi\_+ESI

8/20/2012 12:52:35 PM

CML\_II\_005\_MS^2\_raw\_Orbi\_+ESI\_Orbi\_+ESI #110 RT: 1.10 AV: 1 NL: 9.88E7  
T: FTMS + p ESI Full ms [95.00-600.00]

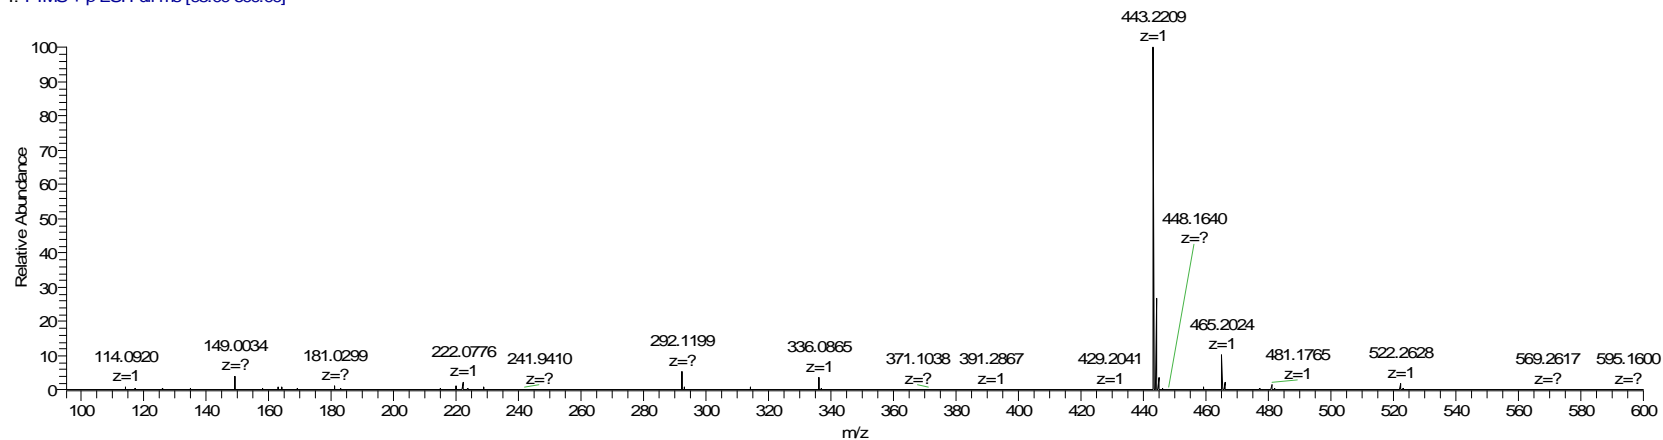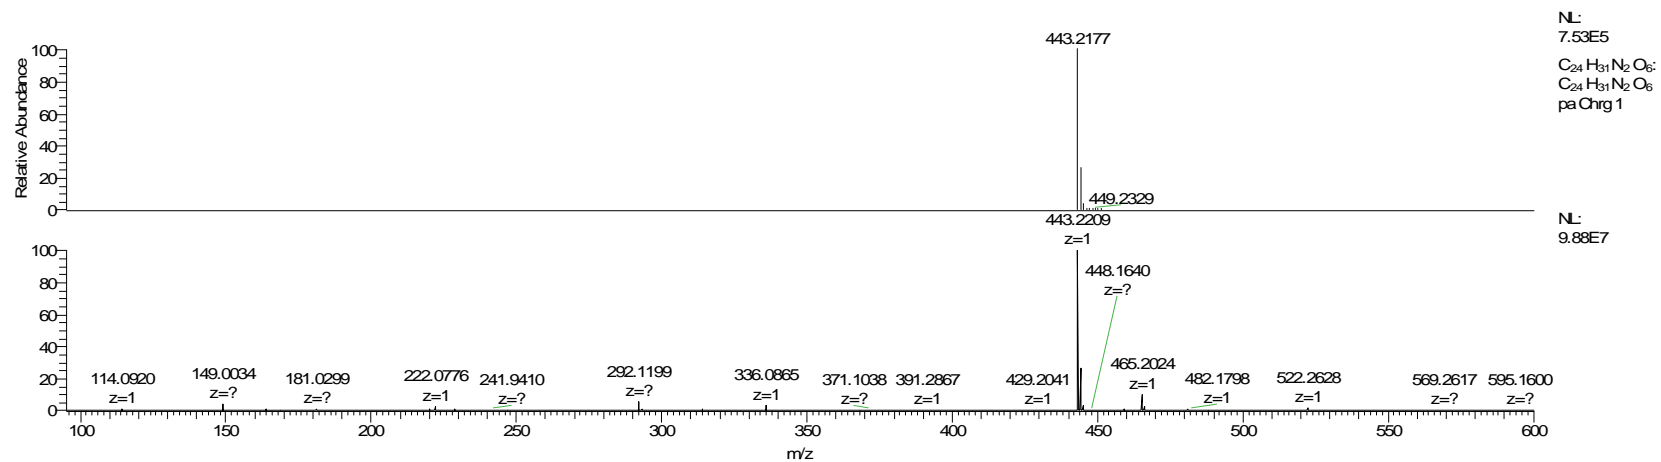

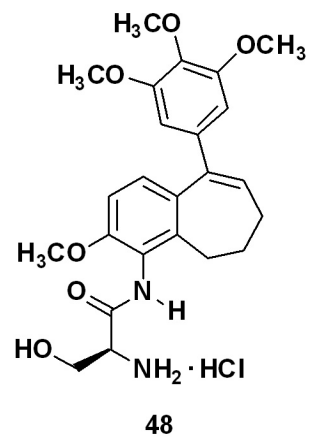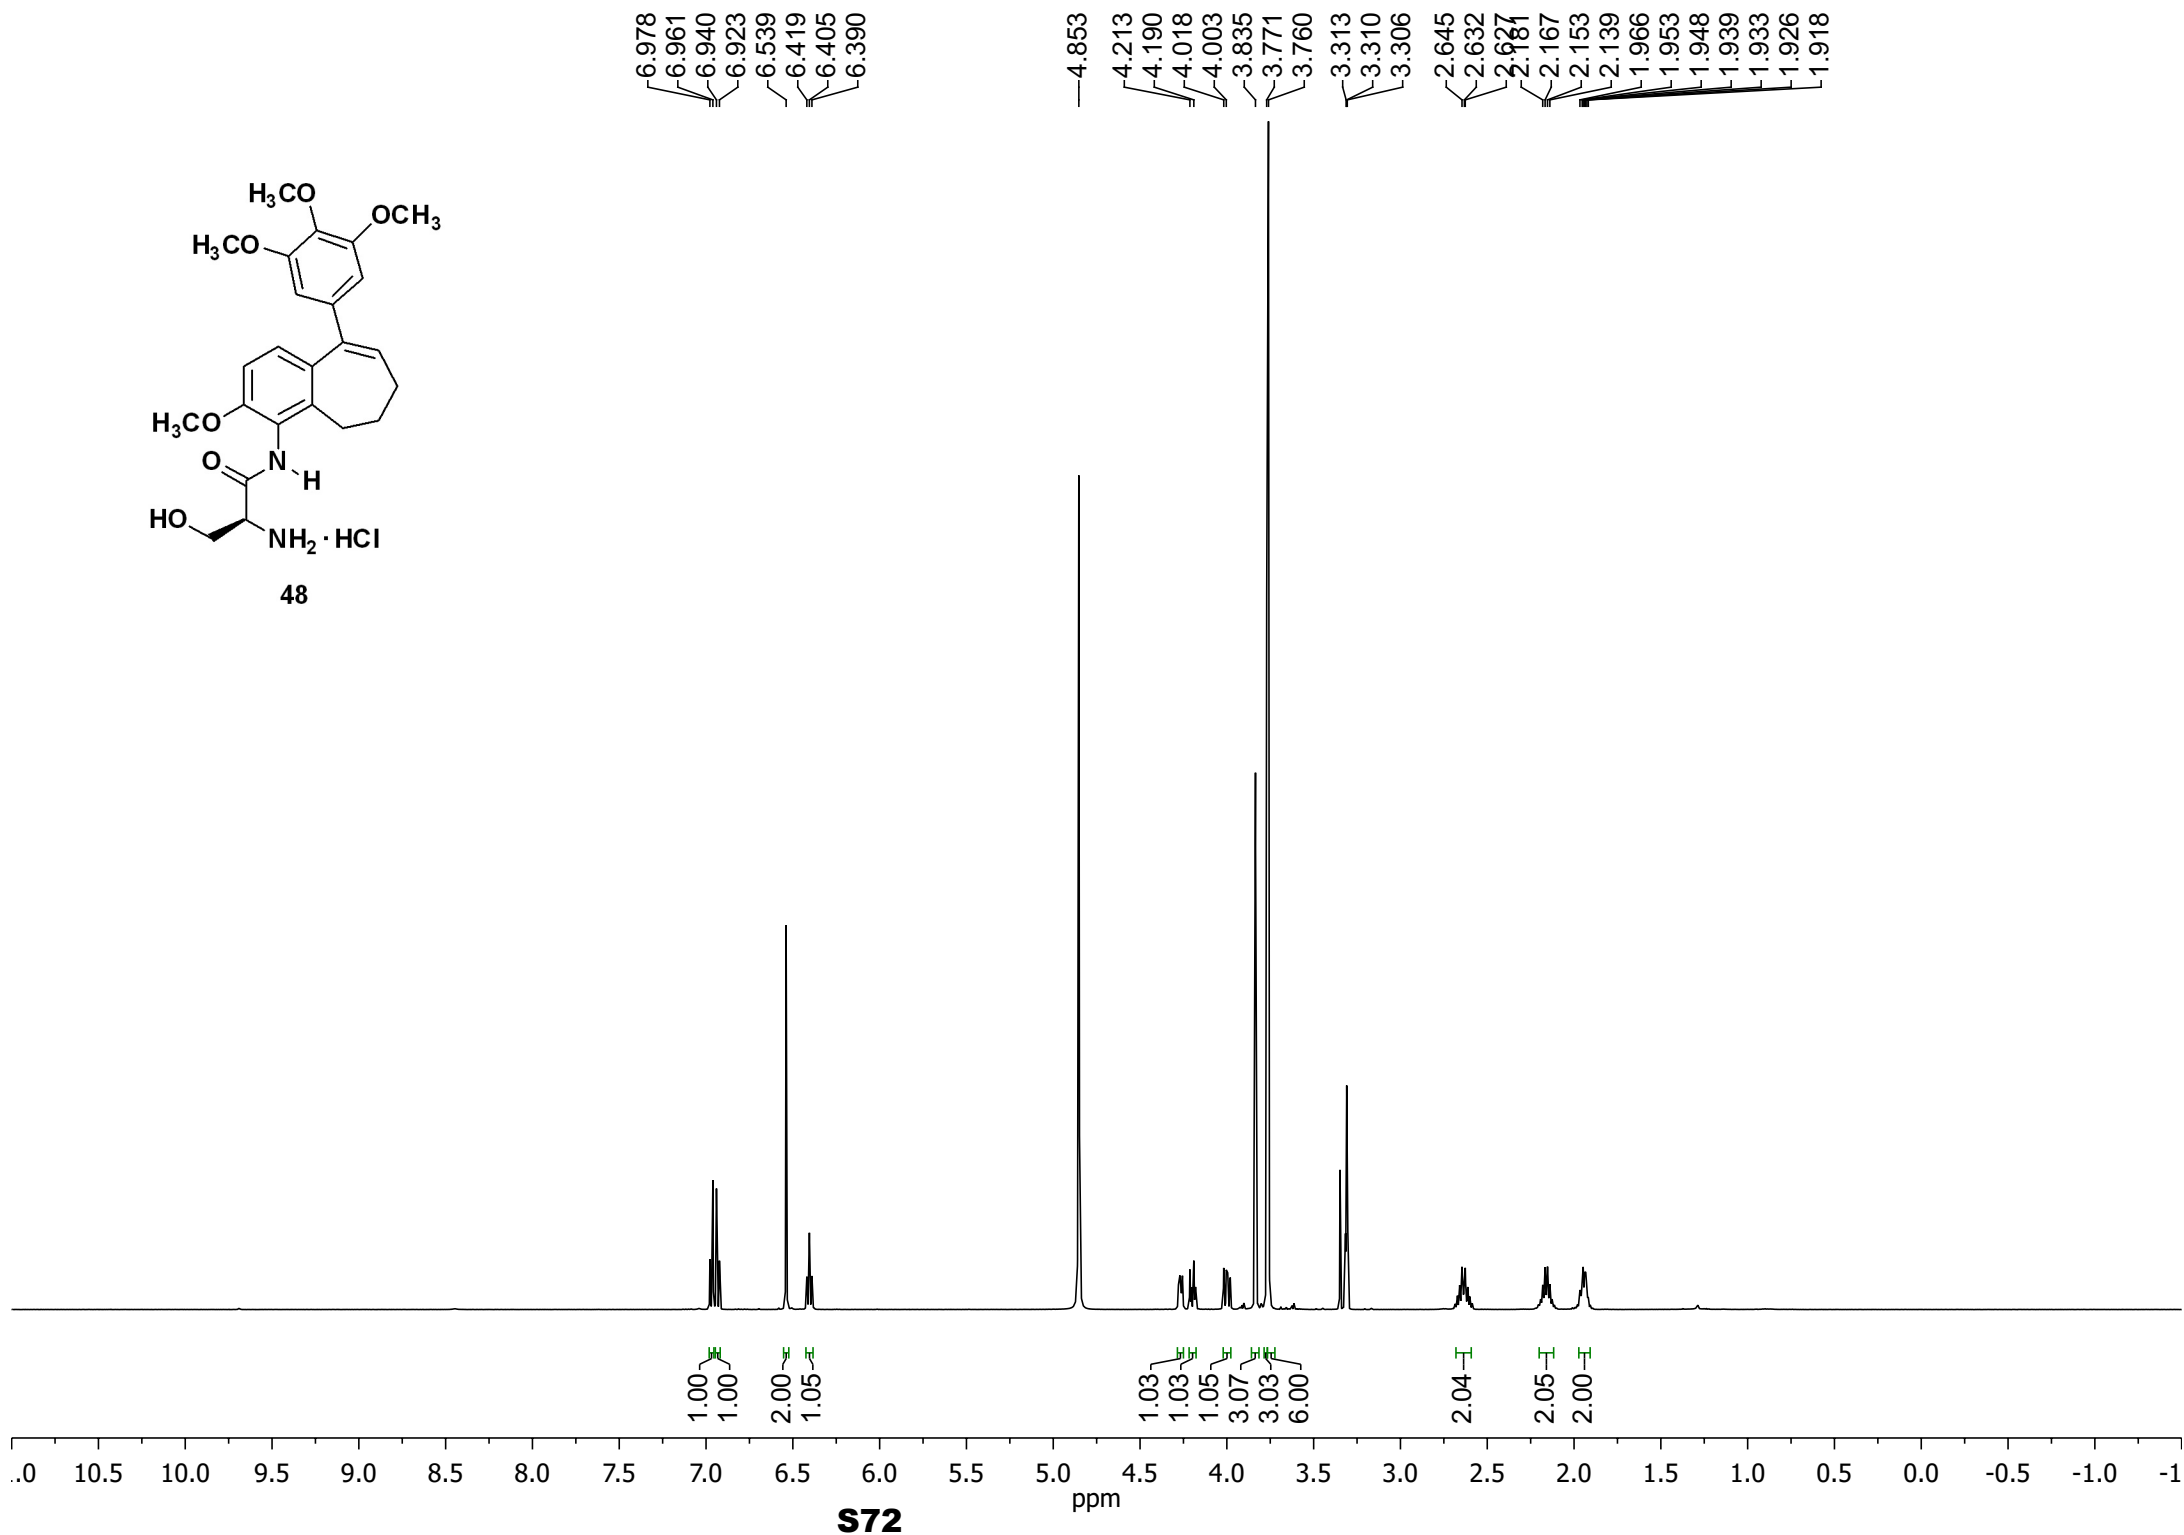

S72



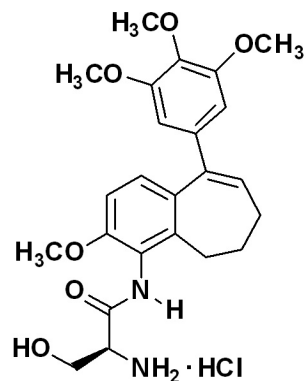

48

—168.39

—155.41  
—154.22

—144.01  
—142.14  
—139.85  
—138.57  
—134.74  
—130.80  
—128.36  
—123.18

—109.92  
—106.59

—62.12  
—61.16  
—56.60  
—56.58  
—56.29  
—49.51  
—49.34  
—49.17  
—49.00  
—48.83  
—48.66  
—48.49  
—35.00  
—27.68  
—26.35

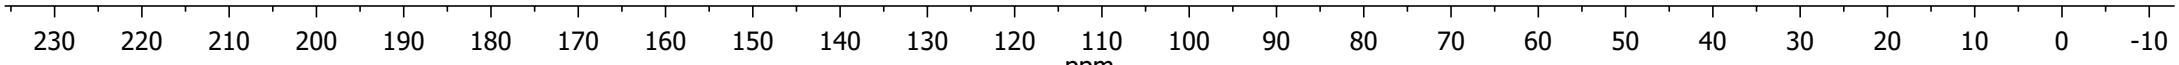

S73

### HPLC Traces of Compound 48

=====  
Acq. Operator : ERIC LIN  
Acq. Instrument : Instrument 1 Location : -  
Injection Date : 8/26/2012 8:14:29 PM  
Acq. Method : C:\CHEM32\1\METHODS\MASTERMETHOD.M  
Last changed : 8/26/2012 8:11:49 PM by ERIC LIN  
(modified after loading)  
Analysis Method : C:\CHEM32\1\DATA\ERIC LIN\II\_017\_RUN10009.D\DA.M (MASTERMETHOD.M)  
Last changed : 8/26/2012 9:04:41 PM by ERIC LIN  
Sample Info :

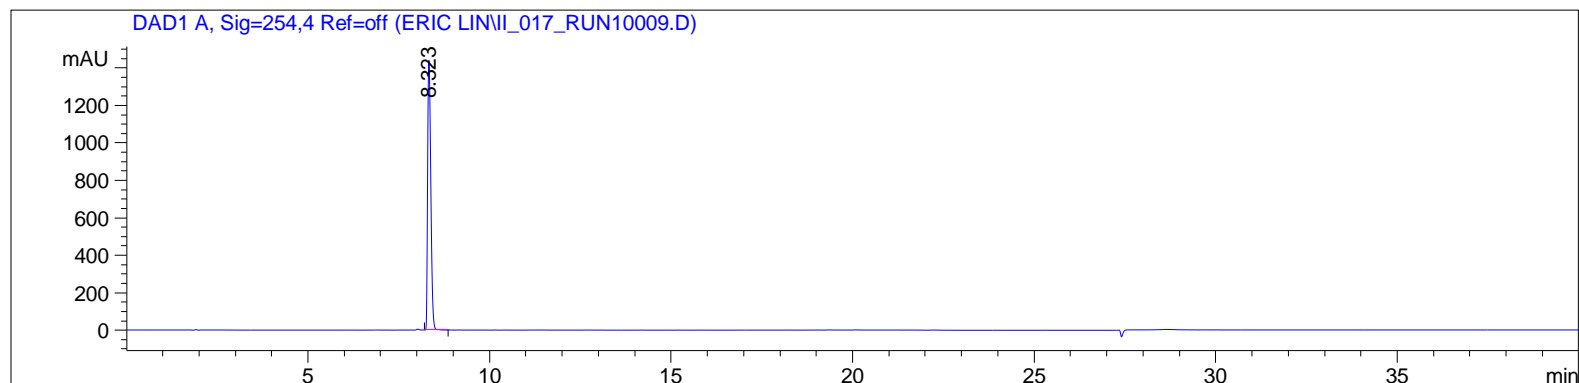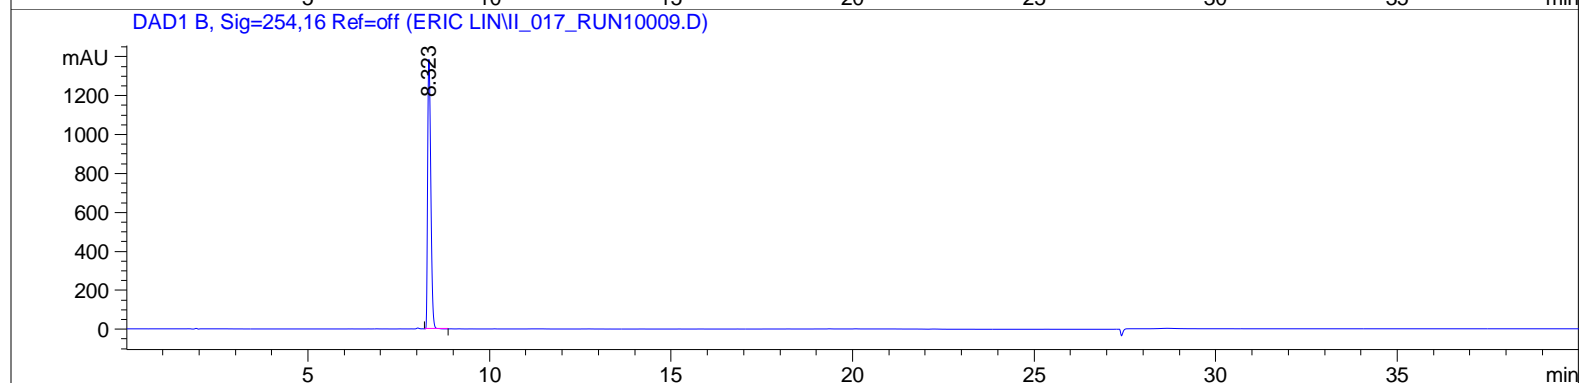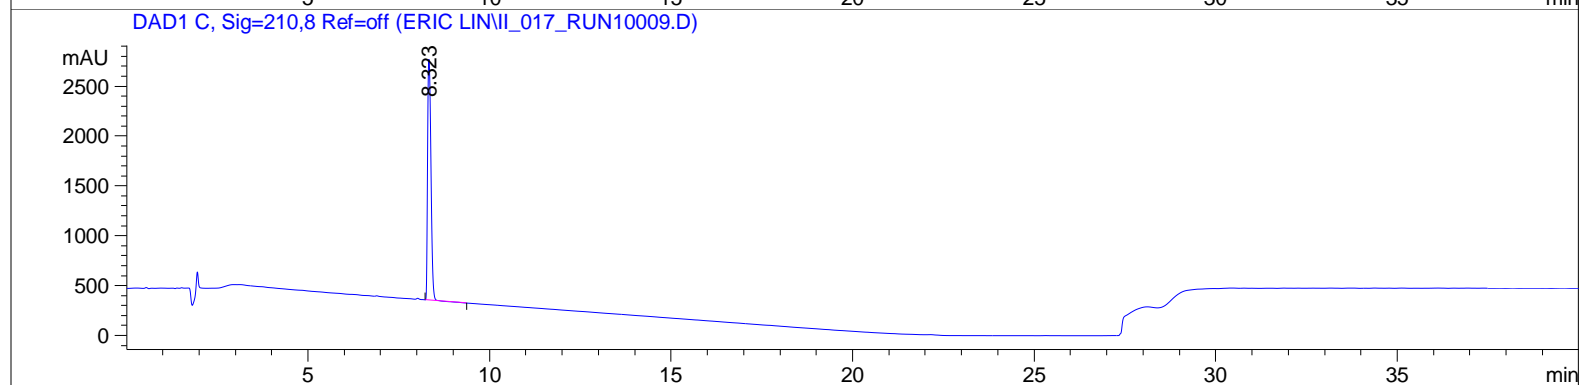

### HPLC Traces of Compound 48

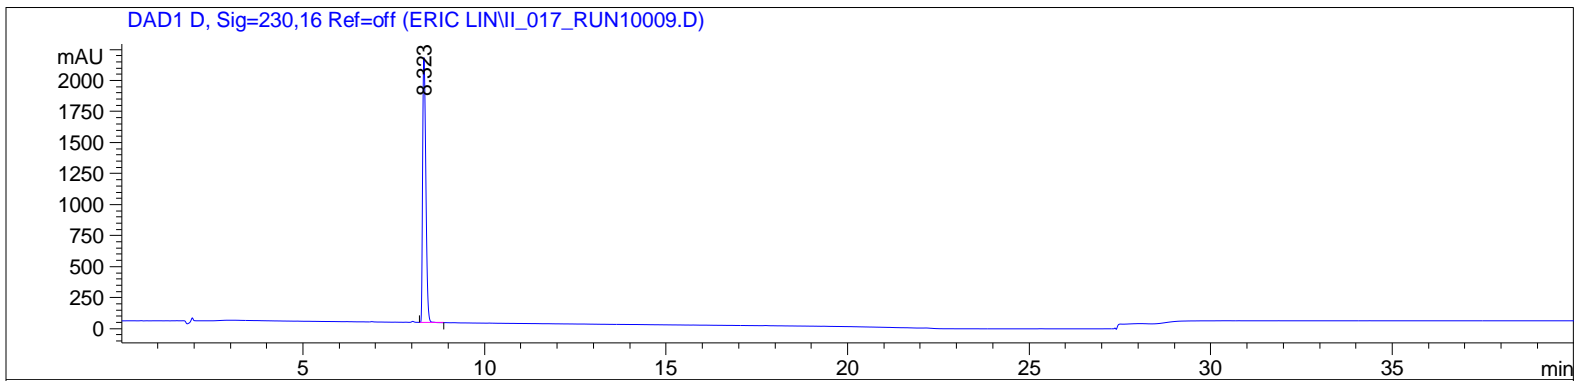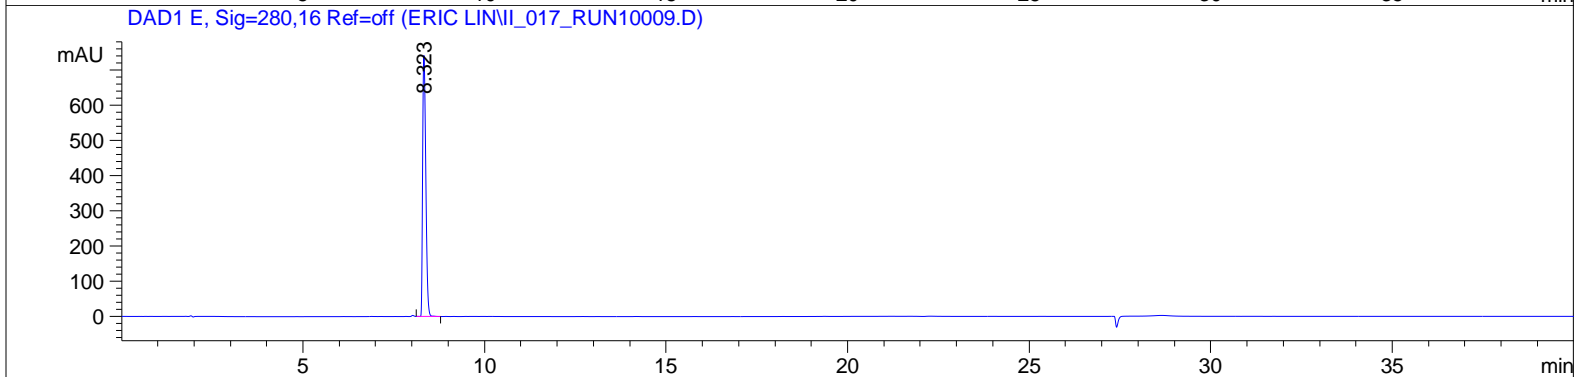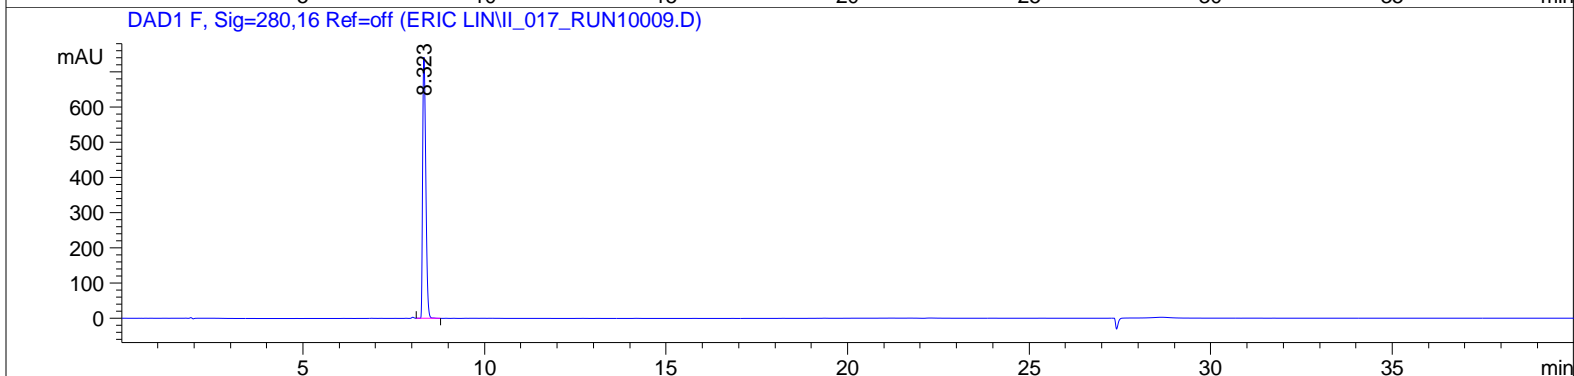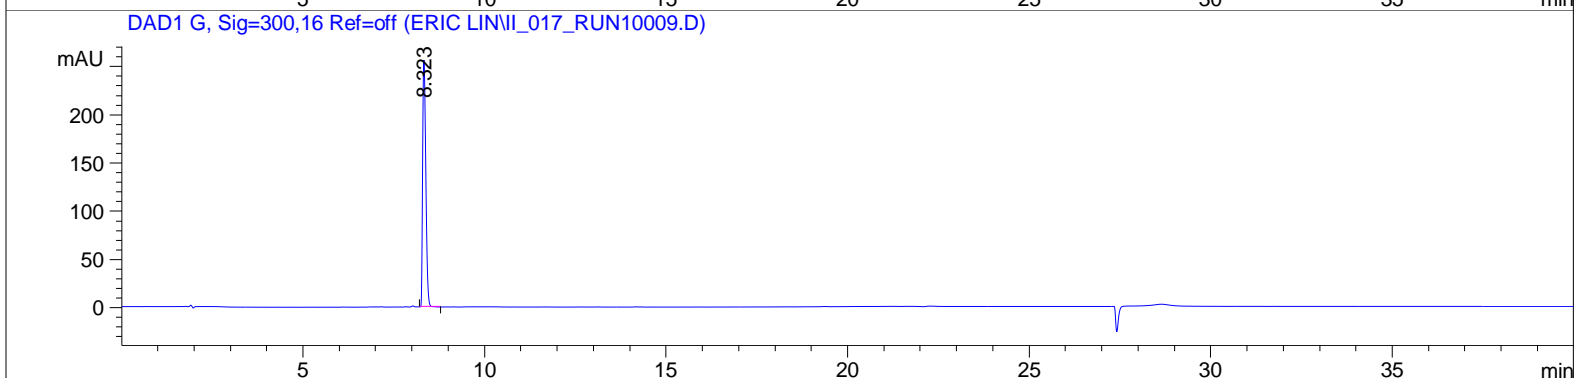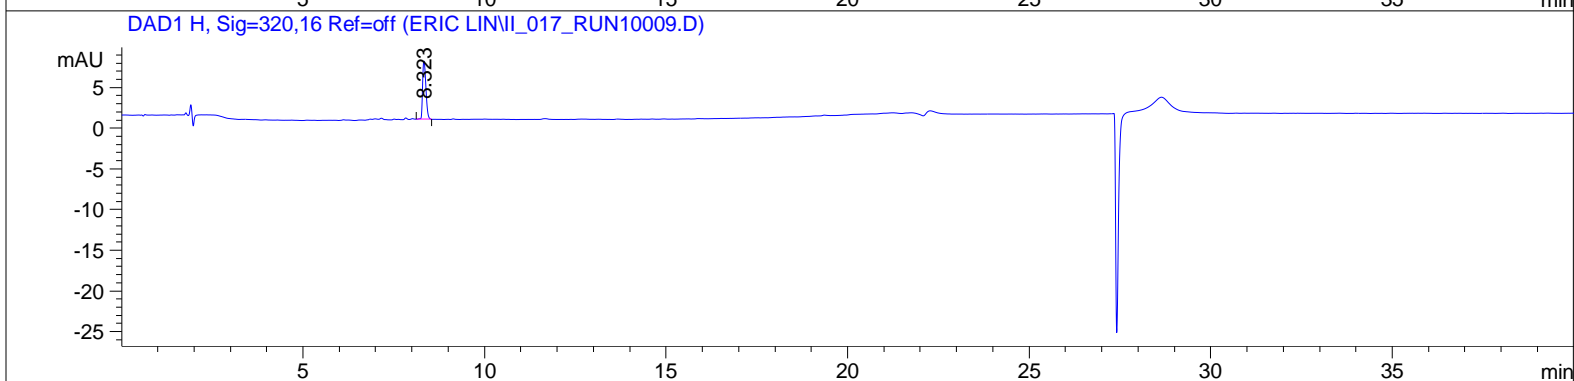

**HPLC Traces of Compound 48**=====  
Area Percent Report  
=====

Sorted By : Signal  
Multiplier : 1.0000  
Dilution : 1.0000  
Use Multiplier & Dilution Factor with ISTDs

Signal 1: DAD1 A, Sig=254,4 Ref=off

| Peak # | RetTime [min] | Type | Width [min] | Area [mAU*s] | Height [mAU] | Area %   |
|--------|---------------|------|-------------|--------------|--------------|----------|
| 1      | 8.323         | VV   | 0.0949      | 8745.86328   | 1439.63110   | 100.0000 |

Totals : 8745.86328 1439.63110

Signal 2: DAD1 B, Sig=254,16 Ref=off

| Peak # | RetTime [min] | Type | Width [min] | Area [mAU*s] | Height [mAU] | Area %   |
|--------|---------------|------|-------------|--------------|--------------|----------|
| 1      | 8.323         | VB   | 0.0948      | 8403.83496   | 1384.48010   | 100.0000 |

Totals : 8403.83496 1384.48010

Signal 3: DAD1 C, Sig=210,8 Ref=off

| Peak # | RetTime [min] | Type | Width [min] | Area [mAU*s] | Height [mAU] | Area %   |
|--------|---------------|------|-------------|--------------|--------------|----------|
| 1      | 8.323         | VB   | 0.1035      | 1.56445e4    | 2416.47046   | 100.0000 |

Totals : 1.56445e4 2416.47046

Signal 4: DAD1 D, Sig=230,16 Ref=off

| Peak # | RetTime [min] | Type | Width [min] | Area [mAU*s] | Height [mAU] | Area %   |
|--------|---------------|------|-------------|--------------|--------------|----------|
| 1      | 8.323         | VV   | 0.0977      | 1.31259e4    | 2134.97778   | 100.0000 |

Totals : 1.31259e4 2134.97778

**S76**

Sample Name: CML\_II\_017\_run1

**HPLC Traces of Compound 48**

Signal 5: DAD1 E, Sig=280,16 Ref=off

| Peak # | RetTime [min] | Type | Width [min] | Area [mAU*s] | Height [mAU] | Area %   |
|--------|---------------|------|-------------|--------------|--------------|----------|
| 1      | 8.323         | VB   | 0.0948      | 4502.56006   | 741.66730    | 100.0000 |

Totals : 4502.56006 741.66730

Signal 6: DAD1 F, Sig=280,16 Ref=off

| Peak # | RetTime [min] | Type | Width [min] | Area [mAU*s] | Height [mAU] | Area %   |
|--------|---------------|------|-------------|--------------|--------------|----------|
| 1      | 8.323         | VB   | 0.0948      | 4502.56006   | 741.66730    | 100.0000 |

Totals : 4502.56006 741.66730

Signal 7: DAD1 G, Sig=300,16 Ref=off

| Peak # | RetTime [min] | Type | Width [min] | Area [mAU*s] | Height [mAU] | Area %   |
|--------|---------------|------|-------------|--------------|--------------|----------|
| 1      | 8.323         | BB   | 0.0949      | 1553.26367   | 255.71465    | 100.0000 |

Totals : 1553.26367 255.71465

Signal 8: DAD1 H, Sig=320,16 Ref=off

| Peak # | RetTime [min] | Type | Width [min] | Area [mAU*s] | Height [mAU] | Area %   |
|--------|---------------|------|-------------|--------------|--------------|----------|
| 1      | 8.323         | BB   | 0.0998      | 45.32738     | 7.16882      | 100.0000 |

Totals : 45.32738 7.16882

=====  
\*\*\* End of Report \*\*\***S77**

# HRMS of Compound 48

CML\_IL\_017\_MS^3\_raw\_ORBI+ESI

8/26/2012 11:33:23 PM

CML\_IL\_017\_MS^3\_raw\_ORBI+ESI #58 RT: 0.86 AV: 1 NL: 1.01E7  
T: FTMS + p ESI Full ms2 443.22@cid0.00 [120.00-500.00]

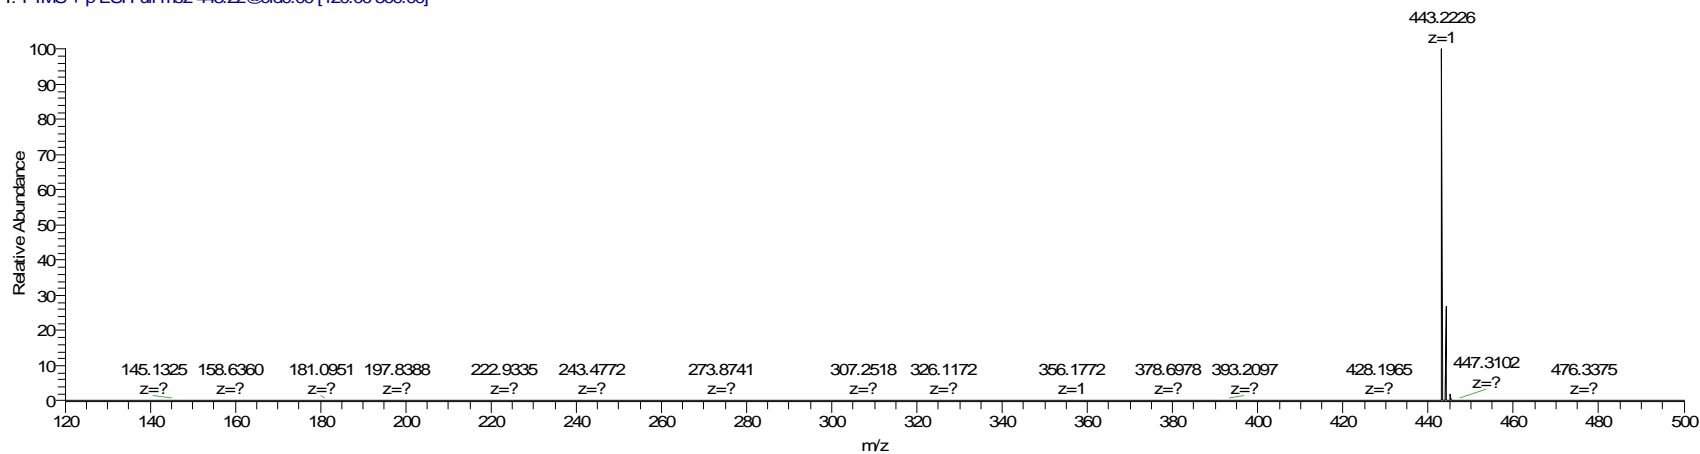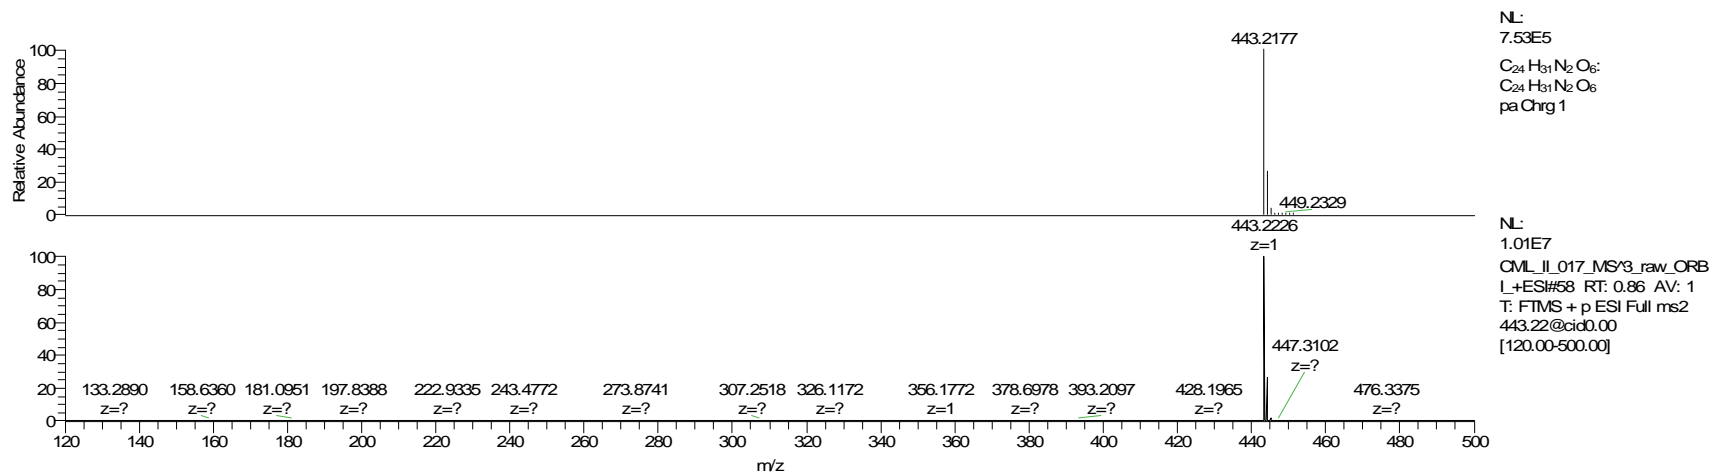

# HSQC for Compound 38

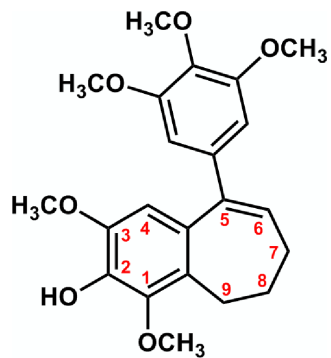

38

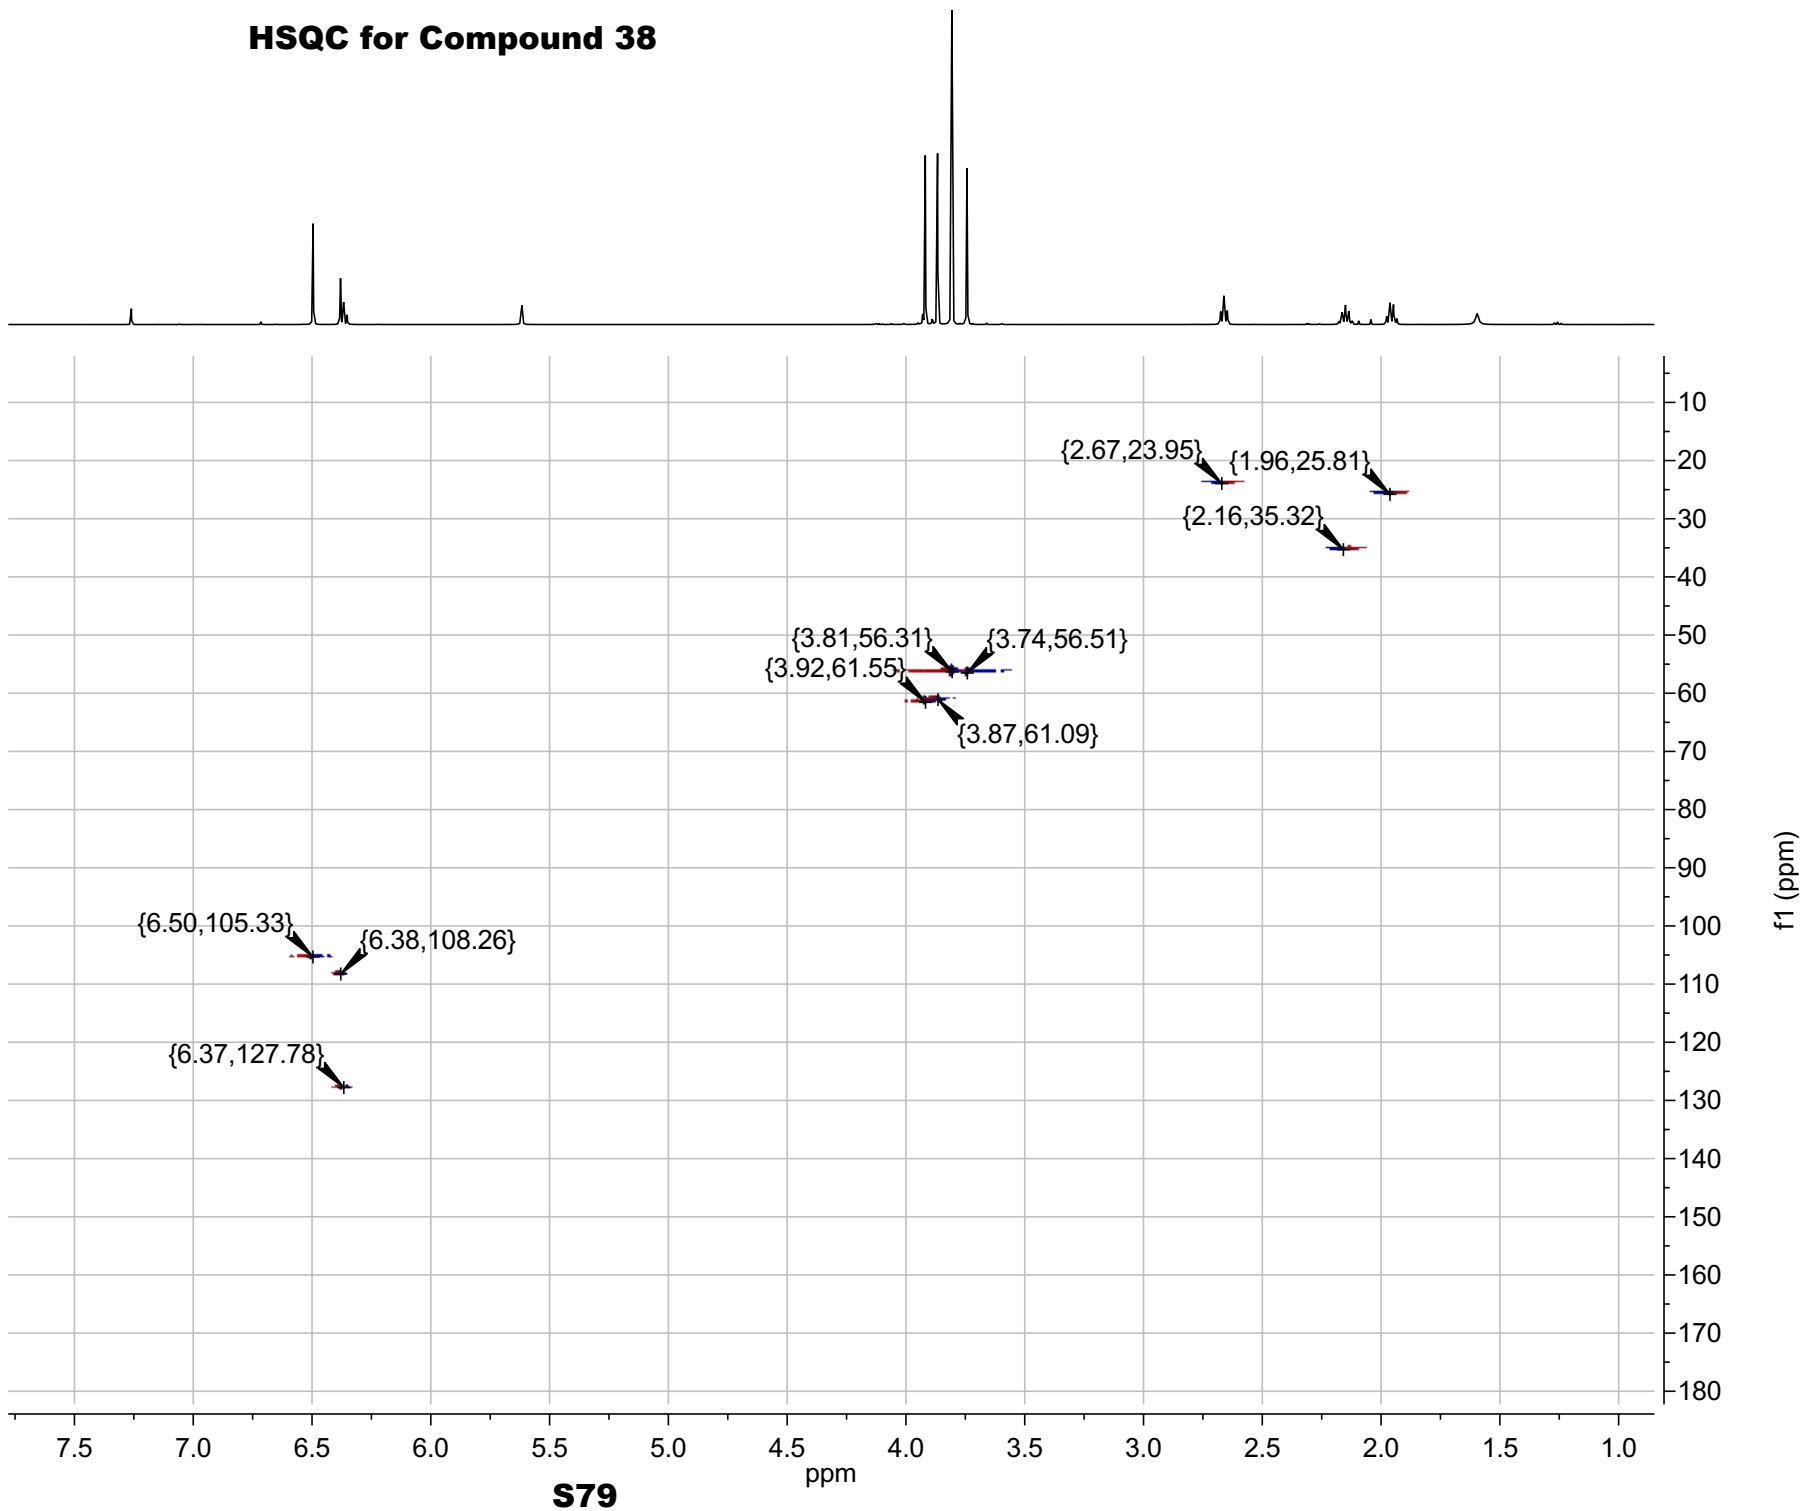

# HMBC for Compound 38

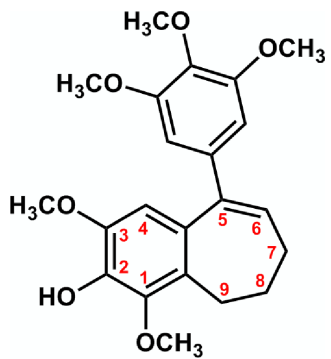

38

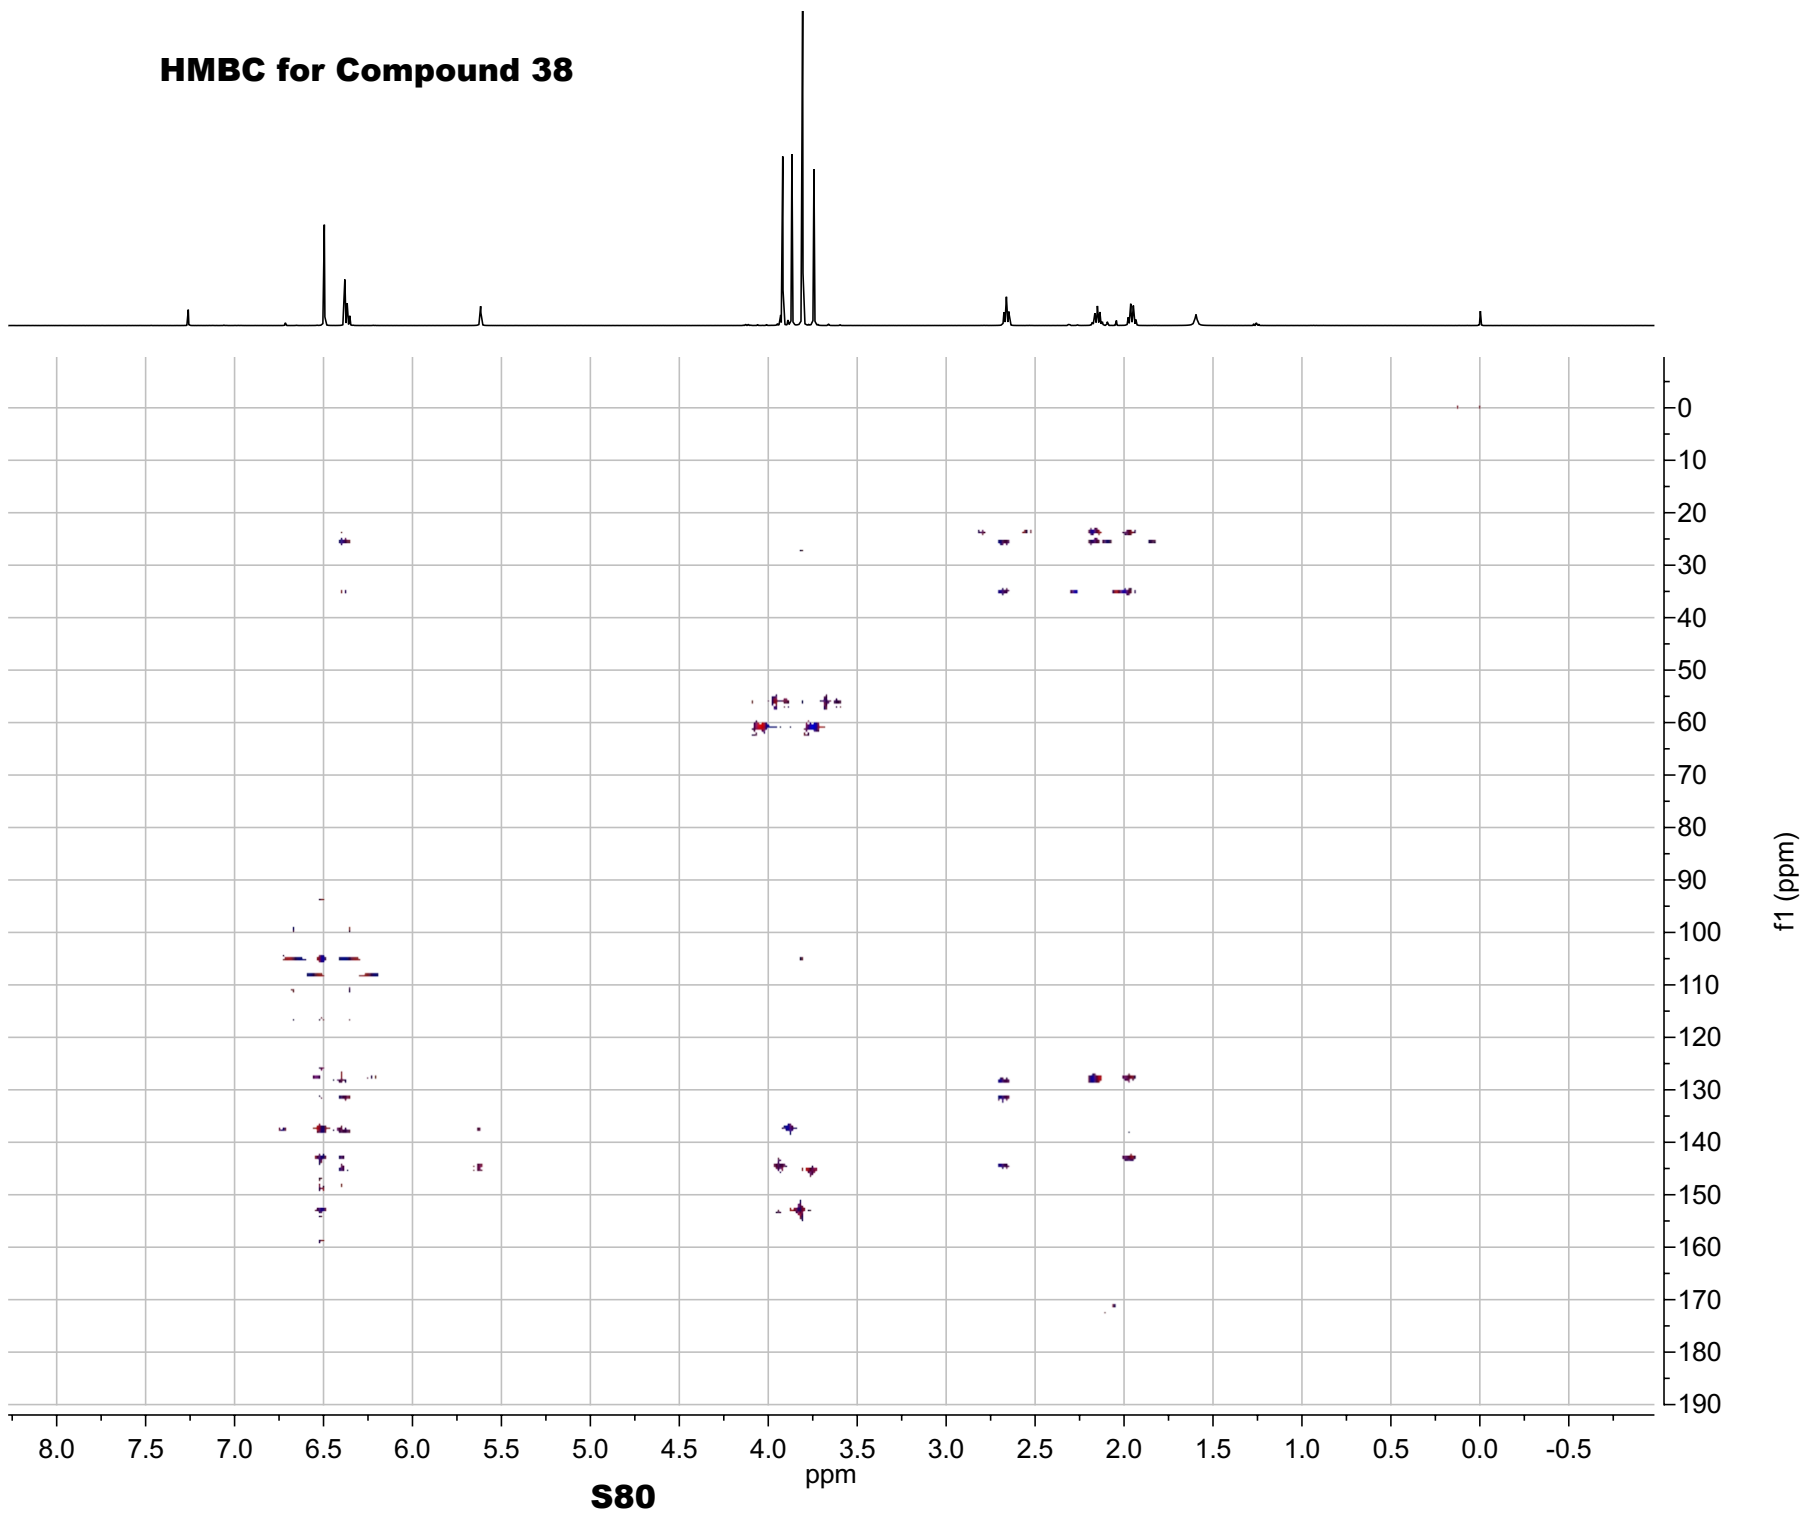



### Zoomed in area of HMBC of compound 38

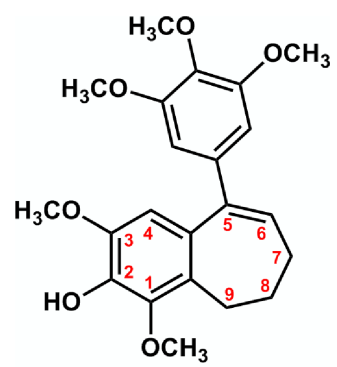

38

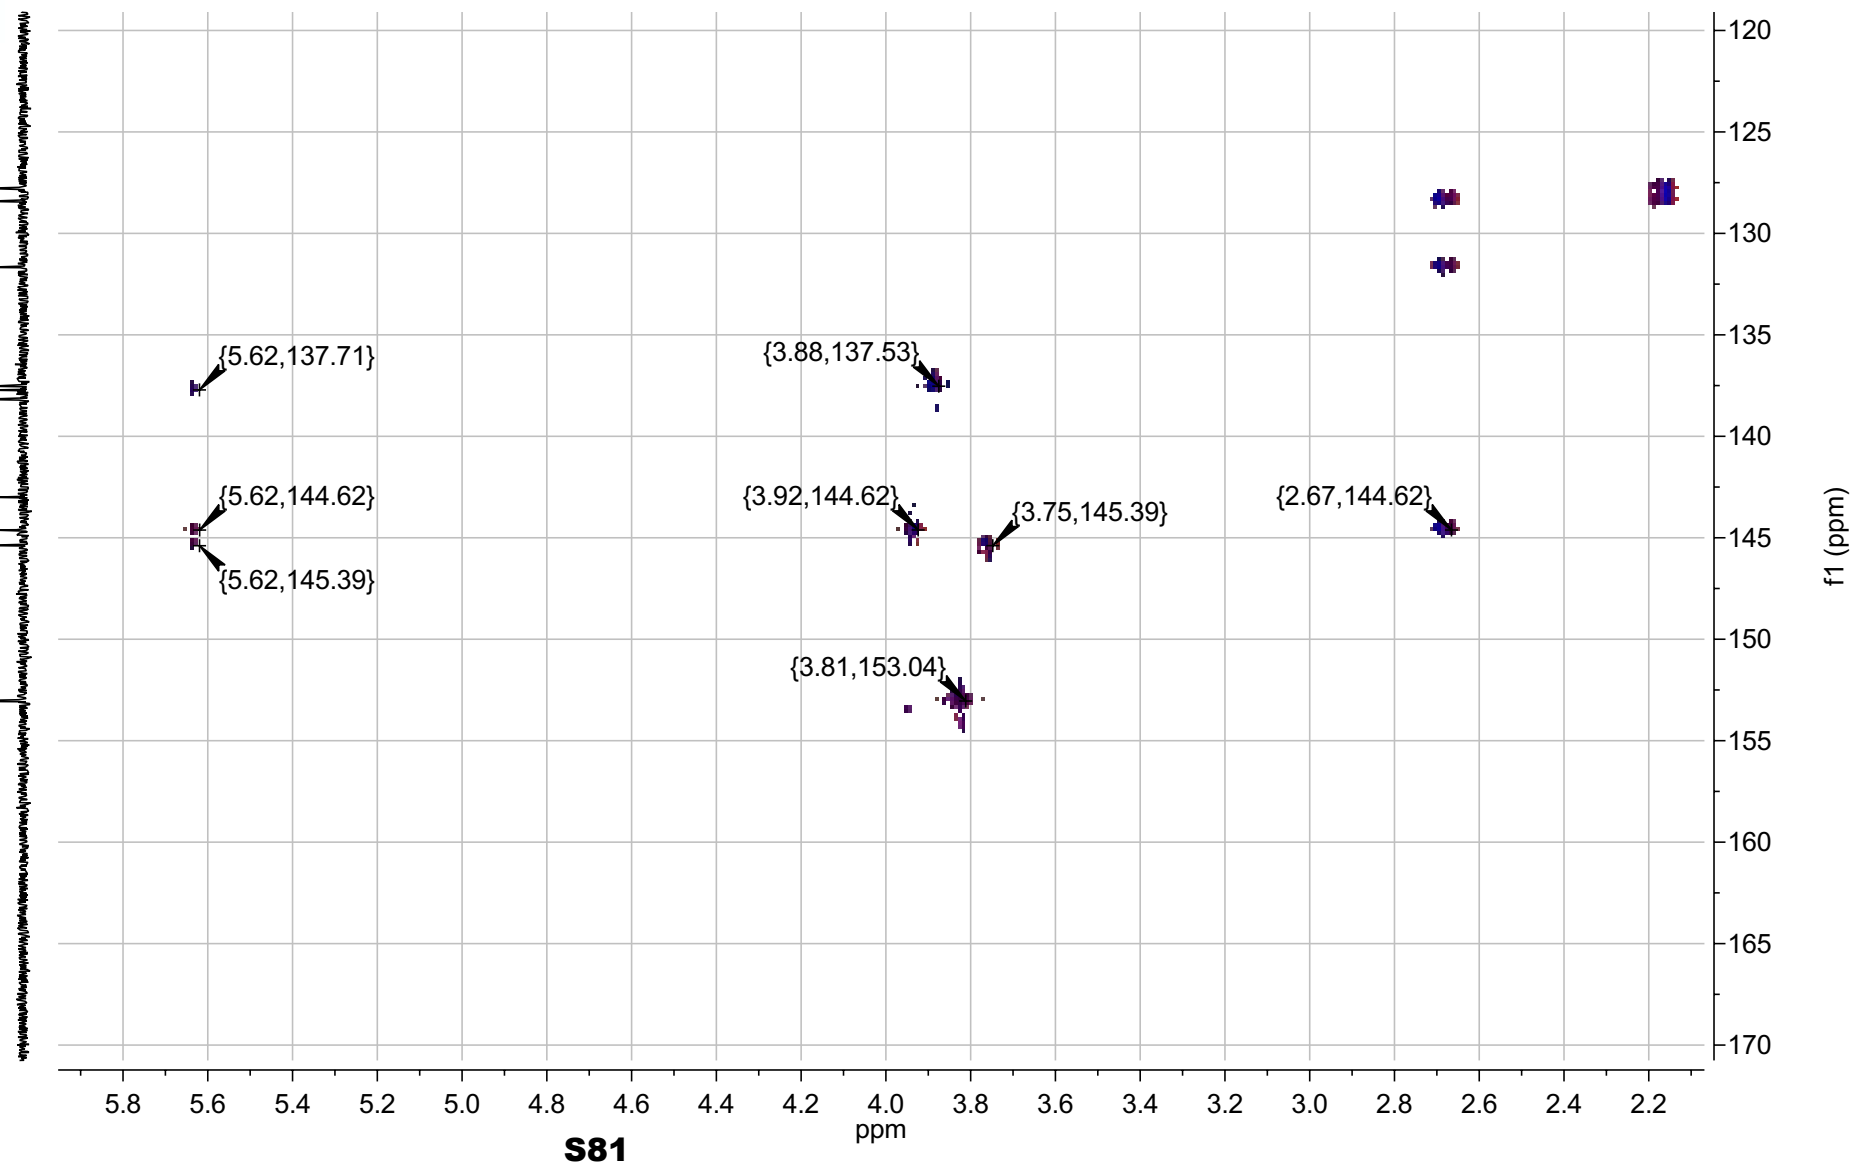

The regio demethylation en route to final compound 38 was determined by the HSQC and HMBC of compound 38. The HSQC revealed a total of ten C-H correlations as expected with the key coordination of the carbon at the 4 position (127.78 ppm) to the proton at 6.37 ppm. The HMBC revealed the coordination of the free phenol proton to a total of three carbons; the carbon at position 3 (145.39 ppm) which is also coordinated to the methoxy protons (3.75 ppm) at position 3, the carbon at position 1 (144.62 ppm) which is also coordinated to the methoxy protons (3.92 ppm) at position 1 and the aliphatic protons (2.67 ppm) at position 9, and the coordination to carbon at position 2 (137.71 ppm) for which the phenol substituent is attached. The assignment of 137.71 ppm to the carbon at position 2 was determined by the observed coupling to the phenolic proton in addition to the absence of coupling of the phenolic proton to the carbon at position 4 (127.78 ppm) which was established by the HSQC.

### X-ray Crystallographic Analysis:

X-ray crystallographic analysis of compound **38**.<sup>S1</sup> Crystallographic data

were collected on a crystal of **38** with dimensions 0.20 x 0.18 x 0.10 mm<sup>3</sup>. Data were collected at 110 K on a Bruker X8 Apex using Mo KR radiation ( $\lambda = 0.71073 \text{ \AA}$ ). The structure was solved by direct methods after correction of the data using SADABS.

Crystallographic data and refinement details for the complex mentioned herein is found in the Supporting Information (Table S1-S4). The thermal ellipsoid plots at 50% probability for compound **38** is displayed in Figure S1 and Figures S2. All data were processed using the Bruker AXS SHELXTL software, version 6.10.

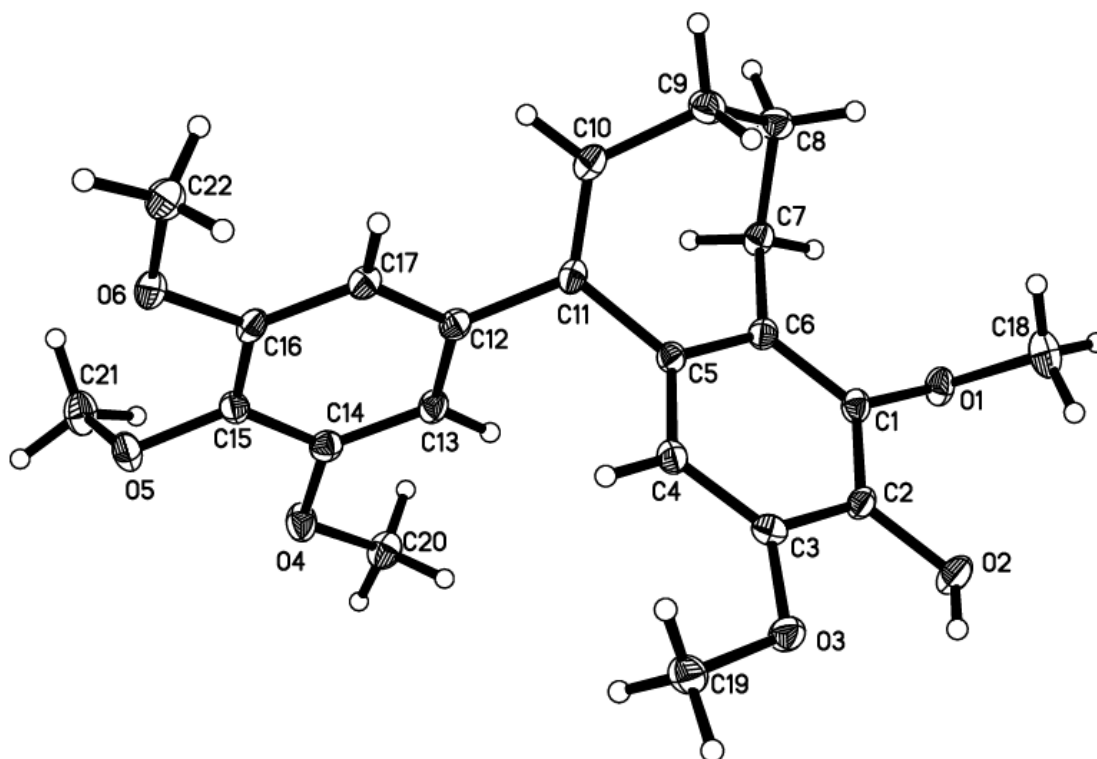

Figure S1. X-ray crystallography of compound **38**

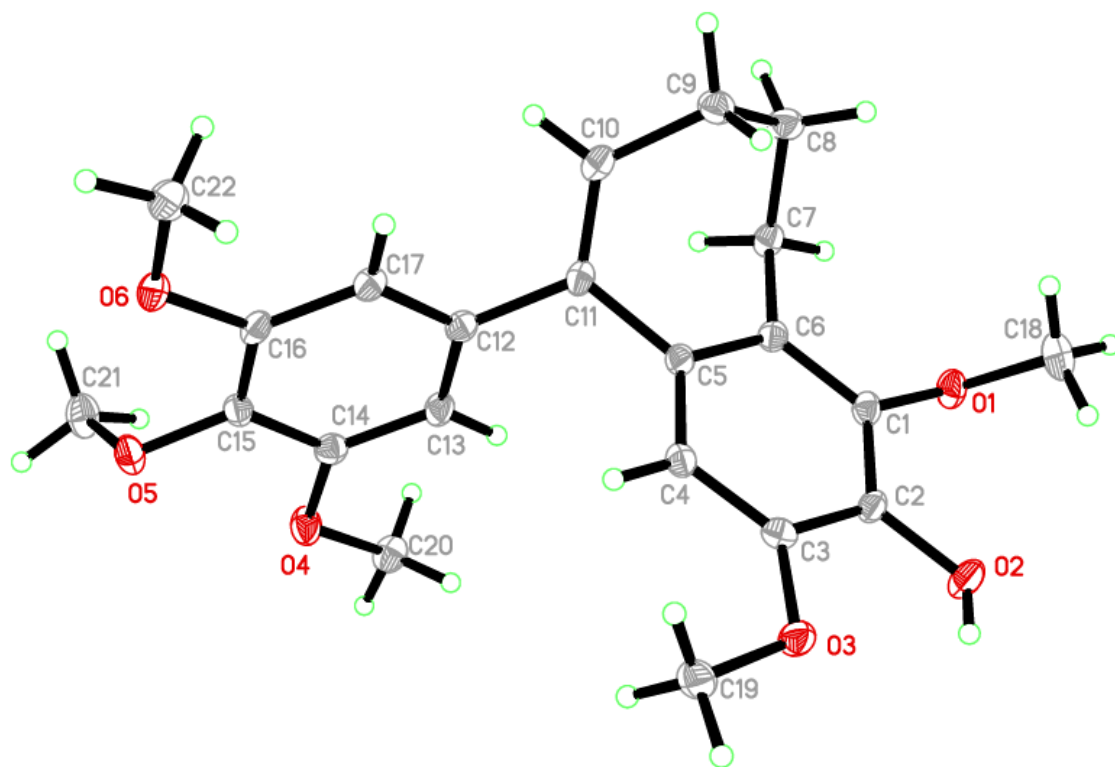

Figure S2. X-ray crystallography of compound **38**

Table S1. Crystal data and structure refinement for **38**

|                                   |                                                |          |
|-----------------------------------|------------------------------------------------|----------|
| Identification code               | kp63                                           |          |
| Empirical formula                 | C <sub>22</sub> H <sub>26</sub> O <sub>6</sub> |          |
| Formula weight                    | 386.43                                         |          |
| Temperature                       | 110(2) K                                       |          |
| Wavelength                        | 0.71073 Å                                      |          |
| Crystal system                    | Orthorhombic                                   |          |
| Space group                       | P2(1)2(1)2(1)                                  |          |
| Unit cell dimensions              | a = 5.1754(3) Å                                | α = 90°. |
|                                   | b = 11.8147(7) Å                               | β = 90°. |
|                                   | c = 30.8093(18) Å                              | γ = 90°. |
| Volume                            | 1883.86(19) Å <sup>3</sup>                     |          |
| Z                                 | 4                                              |          |
| Density (calculated)              | 1.362 Mg/m <sup>3</sup>                        |          |
| Absorption coefficient            | 0.099 mm <sup>-1</sup>                         |          |
| F(000)                            | 824                                            |          |
| Crystal size                      | 0.20 x 0.18 x 0.10 mm <sup>3</sup>             |          |
| Theta range for data collection   | 1.32 to 28.34°.                                |          |
| Index ranges                      | -6 ≤ h ≤ 6, -15 ≤ k ≤ 15, -41 ≤ l ≤ 35         |          |
| Reflections collected             | 17128                                          |          |
| Independent reflections           | 4660 [R(int) = 0.0450]                         |          |
| Completeness to theta = 28.34°    | 99.9 %                                         |          |
| Absorption correction             | Semi-empirical from equivalents                |          |
| Max. and min. transmission        | 0.9907 and 0.9806                              |          |
| Refinement method                 | Full-matrix least-squares on F <sup>2</sup>    |          |
| Data / restraints / parameters    | 4660 / 0 / 262                                 |          |
| Goodness-of-fit on F <sup>2</sup> | 1.231                                          |          |
| Final R indices [I > 2σ(I)]       | R1 = 0.0393, wR2 = 0.0961                      |          |
| R indices (all data)              | R1 = 0.0468, wR2 = 0.1101                      |          |
| Largest diff. peak and hole       | 0.241 and -0.267 e.Å <sup>-3</sup>             |          |

Table S2. Atomic coordinates ( $\times 10^4$ ) and equivalent isotropic displacement parameters ( $\text{\AA}^2 \times 10^3$ ) for **38**.  $U(\text{eq})$  is defined as one third of the trace of the orthogonalized  $U^{ij}$  tensor.

|       | x        | y        | z       | $U(\text{eq})$ |
|-------|----------|----------|---------|----------------|
| O(2)  | 6188(3)  | 1777(1)  | 1255(1) | 21(1)          |
| O(3)  | 9569(2)  | 3137(1)  | 1643(1) | 18(1)          |
| O(1)  | 2618(2)  | 2567(1)  | 683(1)  | 18(1)          |
| O(6)  | 9213(2)  | 9929(1)  | 1555(1) | 18(1)          |
| O(5)  | 6103(2)  | 9665(1)  | 2243(1) | 18(1)          |
| O(4)  | 2878(2)  | 7889(1)  | 2305(1) | 20(1)          |
| C(5)  | 5822(3)  | 5215(1)  | 997(1)  | 13(1)          |
| C(9)  | 5668(3)  | 5989(2)  | 91(1)   | 18(1)          |
| C(2)  | 6132(3)  | 2910(1)  | 1168(1) | 14(1)          |
| C(7)  | 2100(3)  | 4910(1)  | 479(1)  | 16(1)          |
| C(3)  | 7829(3)  | 3656(1)  | 1374(1) | 15(1)          |
| C(6)  | 4137(3)  | 4473(1)  | 785(1)  | 14(1)          |
| C(10) | 5642(3)  | 6782(1)  | 473(1)  | 18(1)          |
| C(11) | 5791(3)  | 6442(1)  | 887(1)  | 14(1)          |
| C(4)  | 7635(3)  | 4802(1)  | 1296(1) | 14(1)          |
| C(1)  | 4326(3)  | 3315(1)  | 874(1)  | 14(1)          |
| C(8)  | 3170(3)  | 5295(2)  | 40(1)   | 18(1)          |
| C(17) | 7590(3)  | 8200(1)  | 1221(1) | 15(1)          |
| C(13) | 4324(3)  | 7147(1)  | 1608(1) | 16(1)          |
| C(16) | 7617(3)  | 9001(1)  | 1552(1) | 14(1)          |
| C(15) | 5982(3)  | 8892(1)  | 1908(1) | 15(1)          |
| C(12) | 5924(3)  | 7276(1)  | 1247(1) | 15(1)          |
| C(14) | 4351(3)  | 7953(1)  | 1936(1) | 15(1)          |
| C(20) | 1001(3)  | 7006(1)  | 2323(1) | 20(1)          |
| C(19) | 11307(3) | 3853(2)  | 1877(1) | 19(1)          |
| C(18) | 3801(4)  | 1828(2)  | 376(1)  | 26(1)          |
| C(22) | 10967(4) | 10039(2) | 1198(1) | 21(1)          |
| C(21) | 3908(3)  | 10401(2) | 2267(1) | 22(1)          |

Table S3. Bond lengths [ $\text{\AA}$ ] and angles [ $^\circ$ ] for **38**.

---

|                  |            |
|------------------|------------|
| O(2)-C(2)        | 1.3657(19) |
| O(3)-C(3)        | 1.3701(19) |
| O(3)-C(19)       | 1.429(2)   |
| O(1)-C(1)        | 1.3814(19) |
| O(1)-C(18)       | 1.426(2)   |
| O(6)-C(16)       | 1.3728(19) |
| O(6)-C(22)       | 1.432(2)   |
| O(5)-C(15)       | 1.3797(19) |
| O(5)-C(21)       | 1.432(2)   |
| O(4)-C(14)       | 1.370(2)   |
| O(4)-C(20)       | 1.427(2)   |
| C(5)-C(6)        | 1.398(2)   |
| C(5)-C(4)        | 1.403(2)   |
| C(5)-C(11)       | 1.489(2)   |
| C(9)-C(10)       | 1.504(2)   |
| C(9)-C(8)        | 1.539(2)   |
| C(2)-C(1)        | 1.385(2)   |
| C(2)-C(3)        | 1.398(2)   |
| C(7)-C(6)        | 1.505(2)   |
| C(7)-C(8)        | 1.531(2)   |
| C(3)-C(4)        | 1.378(2)   |
| C(6)-C(1)        | 1.399(2)   |
| C(10)-C(11)      | 1.339(2)   |
| C(11)-C(12)      | 1.485(2)   |
| C(17)-C(16)      | 1.392(2)   |
| C(17)-C(12)      | 1.394(2)   |
| C(13)-C(14)      | 1.390(2)   |
| C(13)-C(12)      | 1.394(2)   |
| C(16)-C(15)      | 1.391(2)   |
| C(15)-C(14)      | 1.396(2)   |
| <br>             |            |
| C(3)-O(3)-C(19)  | 116.97(12) |
| C(1)-O(1)-C(18)  | 113.57(13) |
| C(16)-O(6)-C(22) | 116.69(13) |

|                   |            |
|-------------------|------------|
| C(15)-O(5)-C(21)  | 113.84(13) |
| C(14)-O(4)-C(20)  | 116.92(13) |
| C(6)-C(5)-C(4)    | 120.35(14) |
| C(6)-C(5)-C(11)   | 119.88(14) |
| C(4)-C(5)-C(11)   | 119.69(15) |
| C(10)-C(9)-C(8)   | 113.87(14) |
| O(2)-C(2)-C(1)    | 118.81(14) |
| O(2)-C(2)-C(3)    | 121.03(15) |
| C(1)-C(2)-C(3)    | 120.16(14) |
| C(6)-C(7)-C(8)    | 113.65(13) |
| O(3)-C(3)-C(4)    | 126.44(15) |
| O(3)-C(3)-C(2)    | 113.92(14) |
| C(4)-C(3)-C(2)    | 119.64(15) |
| C(5)-C(6)-C(1)    | 118.54(15) |
| C(5)-C(6)-C(7)    | 120.91(14) |
| C(1)-C(6)-C(7)    | 120.52(14) |
| C(11)-C(10)-C(9)  | 123.94(15) |
| C(10)-C(11)-C(12) | 121.01(14) |
| C(10)-C(11)-C(5)  | 120.55(15) |
| C(12)-C(11)-C(5)  | 118.44(14) |
| C(3)-C(4)-C(5)    | 120.37(15) |
| O(1)-C(1)-C(2)    | 119.29(14) |
| O(1)-C(1)-C(6)    | 119.76(14) |
| C(2)-C(1)-C(6)    | 120.89(14) |
| C(7)-C(8)-C(9)    | 111.80(14) |
| C(16)-C(17)-C(12) | 119.73(15) |
| C(14)-C(13)-C(12) | 119.97(15) |
| O(6)-C(16)-C(17)  | 123.60(15) |
| O(6)-C(16)-C(15)  | 115.79(14) |
| C(17)-C(16)-C(15) | 120.61(15) |
| O(5)-C(15)-C(16)  | 120.04(15) |
| O(5)-C(15)-C(14)  | 120.47(15) |
| C(16)-C(15)-C(14) | 119.34(15) |
| C(13)-C(12)-C(17) | 119.96(15) |
| C(13)-C(12)-C(11) | 119.69(14) |
| C(17)-C(12)-C(11) | 120.32(15) |



|                   |            |
|-------------------|------------|
| O(4)-C(14)-C(13)  | 124.06(15) |
| O(4)-C(14)-C(15)  | 115.57(14) |
| C(13)-C(14)-C(15) | 120.36(15) |

---

Symmetry transformations used to generate equivalent atoms:

Table S4. Anisotropic displacement parameters ( $\text{\AA}^2 \times 10^3$ ) for **38**. The anisotropic displacement factor exponent takes the form:  $-2\pi^2 [ h^2 a^{*2} U^{11} + \dots + 2 h k a^* b^* U^{12} ]$

|       | U <sup>11</sup> | U <sup>22</sup> | U <sup>33</sup> | U <sup>23</sup> | U <sup>13</sup> | U <sup>12</sup> |
|-------|-----------------|-----------------|-----------------|-----------------|-----------------|-----------------|
| O(2)  | 23(1)           | 12(1)           | 28(1)           | 3(1)            | -6(1)           | 0(1)            |
| O(3)  | 20(1)           | 15(1)           | 19(1)           | 2(1)            | -6(1)           | -1(1)           |
| O(1)  | 18(1)           | 14(1)           | 23(1)           | -3(1)           | -3(1)           | -2(1)           |
| O(6)  | 20(1)           | 14(1)           | 20(1)           | 0(1)            | -1(1)           | -5(1)           |
| O(5)  | 19(1)           | 17(1)           | 19(1)           | -6(1)           | -4(1)           | 1(1)            |
| O(4)  | 25(1)           | 17(1)           | 19(1)           | -4(1)           | 7(1)            | -4(1)           |
| C(5)  | 15(1)           | 12(1)           | 13(1)           | -1(1)           | 3(1)            | 1(1)            |
| C(9)  | 20(1)           | 20(1)           | 15(1)           | 0(1)            | 2(1)            | -2(1)           |
| C(2)  | 17(1)           | 10(1)           | 16(1)           | 1(1)            | 1(1)            | 0(1)            |
| C(7)  | 14(1)           | 14(1)           | 19(1)           | 0(1)            | -2(1)           | 0(1)            |
| C(3)  | 15(1)           | 18(1)           | 12(1)           | 1(1)            | 0(1)            | 0(1)            |
| C(6)  | 15(1)           | 13(1)           | 14(1)           | 0(1)            | 2(1)            | -1(1)           |
| C(10) | 19(1)           | 13(1)           | 21(1)           | 2(1)            | 0(1)            | -2(1)           |
| C(11) | 15(1)           | 11(1)           | 18(1)           | -1(1)           | 2(1)            | 0(1)            |
| C(4)  | 15(1)           | 14(1)           | 14(1)           | -2(1)           | 0(1)            | -1(1)           |
| C(1)  | 15(1)           | 13(1)           | 16(1)           | -2(1)           | 2(1)            | -2(1)           |
| C(8)  | 20(1)           | 20(1)           | 16(1)           | 2(1)            | -3(1)           | 0(1)            |
| C(17) | 15(1)           | 13(1)           | 17(1)           | 1(1)            | 1(1)            | 1(1)            |
| C(13) | 16(1)           | 13(1)           | 18(1)           | 0(1)            | 0(1)            | -4(1)           |
| C(16) | 13(1)           | 10(1)           | 20(1)           | 2(1)            | -4(1)           | 0(1)            |
| C(15) | 17(1)           | 13(1)           | 15(1)           | -2(1)           | -4(1)           | 3(1)            |
| C(12) | 16(1)           | 12(1)           | 16(1)           | 1(1)            | -2(1)           | 3(1)            |
| C(14) | 15(1)           | 15(1)           | 16(1)           | 1(1)            | 0(1)            | 2(1)            |
| C(20) | 19(1)           | 18(1)           | 24(1)           | 1(1)            | 5(1)            | -1(1)           |
| C(19) | 18(1)           | 20(1)           | 19(1)           | 0(1)            | -5(1)           | -4(1)           |
| C(18) | 29(1)           | 22(1)           | 26(1)           | -10(1)          | 0(1)            | -2(1)           |
| C(22) | 21(1)           | 20(1)           | 22(1)           | 1(1)            | 1(1)            | -5(1)           |
| C(21) | 20(1)           | 20(1)           | 27(1)           | -7(1)           | 0(1)            | 3(1)            |

S1. Crystallographic data for structure **38** (deposition number CCDC 953837) reported in this paper have been deposited with the Cambridge Crystallographic Data Centre. Copies of the data can be obtained, free of charge, on application to the Director, CCDC, 12 Union Road, Cambridge CB2 1EZ, UK (fax: +44-(0) 1223-336033 or e-mail: [deposit@ccdc.cam.ac.uk](mailto:deposit@ccdc.cam.ac.uk)).

### X-ray Crystallographic Analysis:

X-ray crystallographic analysis of compound **39**.<sup>S2</sup> Crystallographic data

were collected on a crystal of **39** with dimensions 0.24 x 0.23 x 0.19 mm<sup>3</sup>. Data were collected at 110 K on a Bruker X8 Apex using Mo KR radiation ( $\lambda = 0.71073 \text{ \AA}$ ). The structure was solved by direct methods after correction of the data using SADABS.

Crystallographic data and refinement details for the complex mentioned herein is found in the Supporting Information (Table S5-S9). The thermal ellipsoid plots at 50% probability for compound **39** is displayed in Figure S3 and Figures S4. All data were processed using the Bruker AXS SHELXTL software, version 6.10.

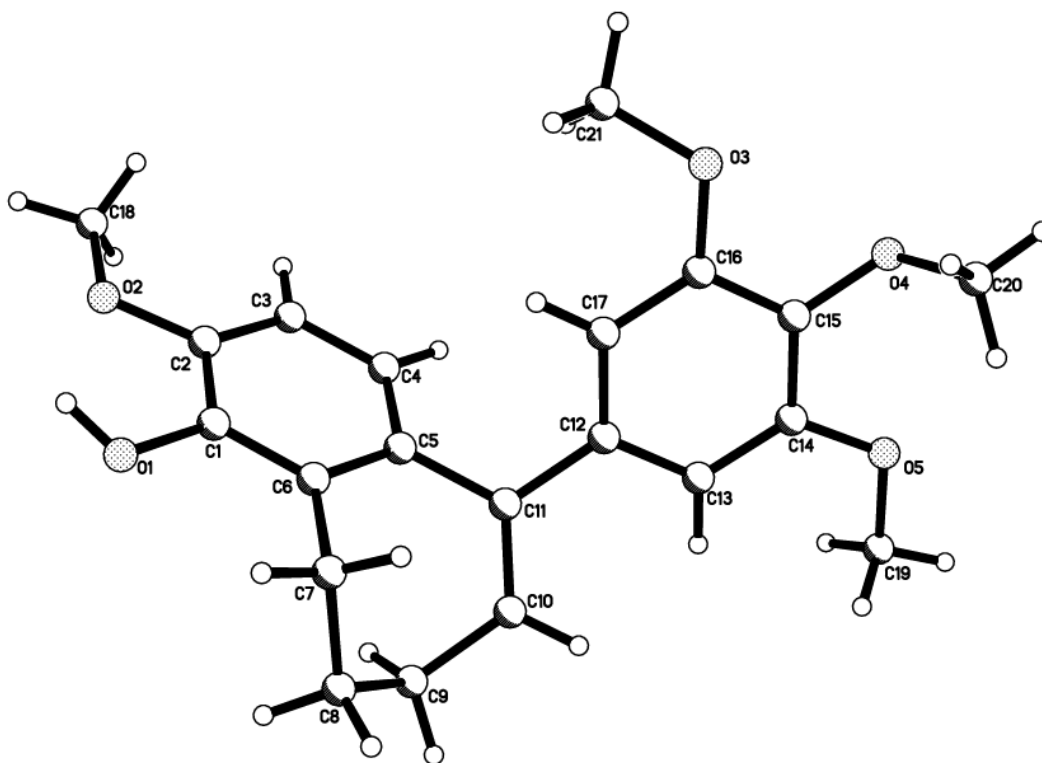

Figure S3. X-ray crystallography of compound **39**

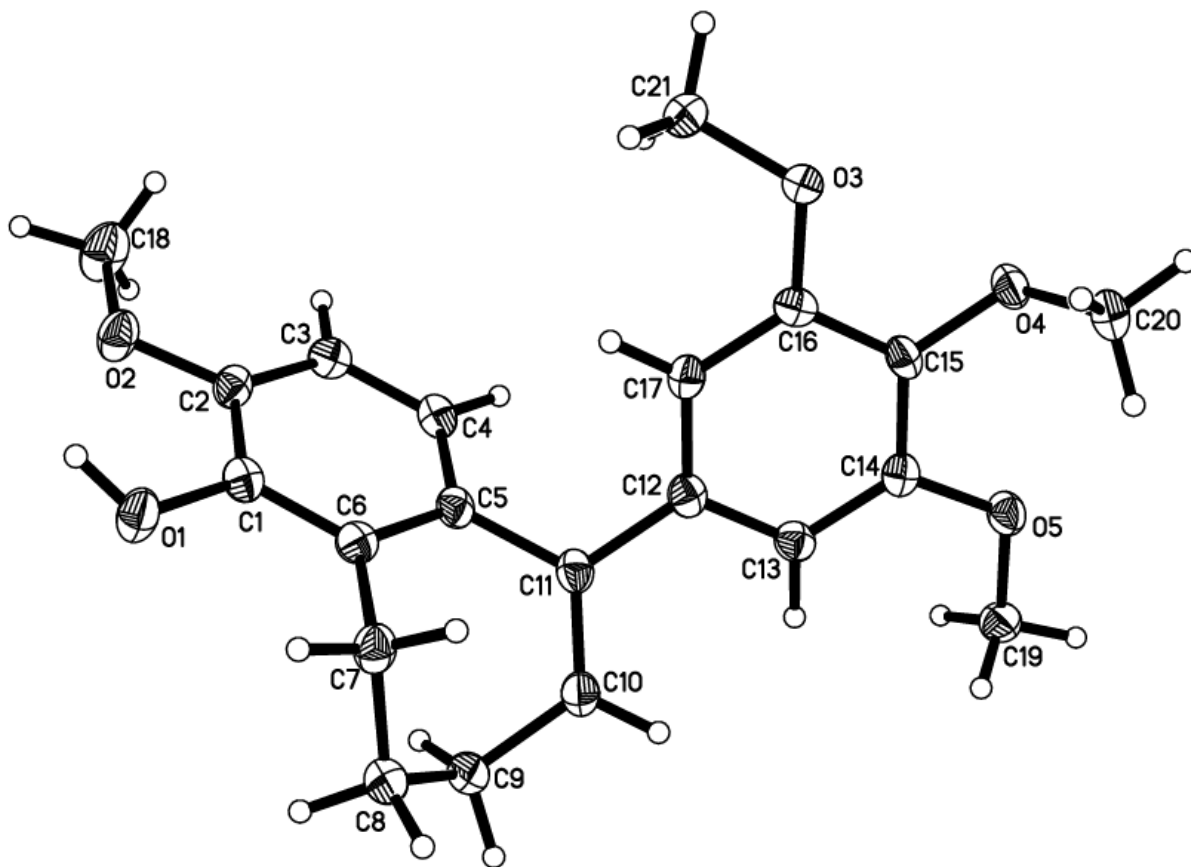

Figure S4. X-ray crystallography of compound **39**

Table S5. Crystal data and structure refinement for compound 39.

|                                   |                                                |          |
|-----------------------------------|------------------------------------------------|----------|
| Identification code               | kp16                                           |          |
| Empirical formula                 | C <sub>21</sub> H <sub>24</sub> O <sub>5</sub> |          |
| Formula weight                    | 356.40                                         |          |
| Temperature                       | 110(2) K                                       |          |
| Wavelength                        | 0.71073 Å                                      |          |
| Crystal system                    | Orthorhombic                                   |          |
| Space group                       | Pbca                                           |          |
| Unit cell dimensions              | a = 16.8122(12) Å                              | α = 90°. |
|                                   | b = 10.9319(8) Å                               | β = 90°. |
|                                   | c = 19.7517(14) Å                              | γ = 90°. |
| Volume                            | 3630.2(5) Å <sup>3</sup>                       |          |
| Z                                 | 8                                              |          |
| Density (calculated)              | 1.304 Mg/m <sup>3</sup>                        |          |
| Absorption coefficient            | 0.092 mm <sup>-1</sup>                         |          |
| F(000)                            | 1520                                           |          |
| Crystal size                      | 0.24 x 0.23 x 0.19 mm <sup>3</sup>             |          |
| Theta range for data collection   | 2.39 to 26.46°.                                |          |
| Index ranges                      | -16 ≤ h ≤ 21, -13 ≤ k ≤ 12, -12 ≤ l ≤ 24       |          |
| Reflections collected             | 23164                                          |          |
| Independent reflections           | 3721 [R(int) = 0.0492]                         |          |
| Completeness to theta = 26.46°    | 99.1 %                                         |          |
| Absorption correction             | Semi-empirical from equivalents                |          |
| Max. and min. transmission        | 0.9826 and 0.9782                              |          |
| Refinement method                 | Full-matrix least-squares on F <sup>2</sup>    |          |
| Data / restraints / parameters    | 3721 / 0 / 243                                 |          |
| Goodness-of-fit on F <sup>2</sup> | 1.016                                          |          |
| Final R indices [I > 2σ(I)]       | R1 = 0.0383, wR2 = 0.0834                      |          |
| R indices (all data)              | R1 = 0.0631, wR2 = 0.0945                      |          |
| Largest diff. peak and hole       | 0.235 and -0.189 e.Å <sup>-3</sup>             |          |

Table S6. Atomic coordinates ( $\times 10^4$ ) and equivalent isotropic displacement parameters ( $\text{\AA}^2 \times 10^3$ ) for **39**.  $U(\text{eq})$  is defined as one third of the trace of the orthogonalized  $U^{ij}$  tensor.

|       | x       | y       | z       |       |
|-------|---------|---------|---------|-------|
| O(1)  | 6395(1) | 3926(1) | 2768(1) | 28(1) |
| O(2)  | 6631(1) | 1736(1) | 2218(1) | 27(1) |
| O(3)  | 2227(1) | 2486(1) | 1280(1) | 22(1) |
| O(4)  | 1432(1) | 3679(1) | 289(1)  | 24(1) |
| O(5)  | 2104(1) | 5563(1) | -372(1) | 24(1) |
| C(1)  | 6003(1) | 3635(2) | 2180(1) | 21(1) |
| C(2)  | 6115(1) | 2490(2) | 1876(1) | 21(1) |
| C(3)  | 5728(1) | 2207(1) | 1279(1) | 22(1) |
| C(4)  | 5227(1) | 3065(1) | 987(1)  | 22(1) |
| C(5)  | 5111(1) | 4209(1) | 1279(1) | 20(1) |
| C(6)  | 5506(1) | 4501(1) | 1888(1) | 20(1) |
| C(7)  | 5361(1) | 5719(1) | 2230(1) | 24(1) |
| C(8)  | 5734(1) | 6812(2) | 1863(1) | 29(1) |
| C(9)  | 5610(1) | 6737(2) | 1093(1) | 28(1) |
| C(10) | 4792(1) | 6295(2) | 902(1)  | 24(1) |
| C(11) | 4569(1) | 5123(1) | 965(1)  | 21(1) |
| C(12) | 3761(1) | 4712(1) | 761(1)  | 20(1) |
| C(13) | 3341(1) | 5326(1) | 254(1)  | 21(1) |
| C(14) | 2562(1) | 5001(1) | 109(1)  | 20(1) |
| C(15) | 2195(1) | 4043(1) | 458(1)  | 20(1) |
| C(16) | 2619(1) | 3416(1) | 950(1)  | 19(1) |
| C(17) | 3398(1) | 3748(1) | 1102(1) | 20(1) |
| C(18) | 6800(1) | 578(2)  | 1913(1) | 37(1) |
| C(19) | 2490(1) | 6476(2) | -773(1) | 25(1) |
| C(20) | 824(1)  | 4457(2) | 555(1)  | 29(1) |
| C(21) | 2724(1) | 1556(1) | 1572(1) | 24(1) |

Table S7. Bond lengths [Å] and angles [°] for **39**.

---

|             |            |
|-------------|------------|
| O(1)-C(1)   | 1.3717(18) |
| O(1)-H(1)   | 0.89(2)    |
| O(2)-C(2)   | 1.3740(18) |
| O(2)-C(18)  | 1.4300(19) |
| O(3)-C(16)  | 1.3762(18) |
| O(3)-C(21)  | 1.4368(18) |
| O(4)-C(15)  | 1.3846(18) |
| O(4)-C(20)  | 1.4299(19) |
| O(5)-C(14)  | 1.3688(18) |
| O(5)-C(19)  | 1.4300(18) |
| C(1)-C(6)   | 1.387(2)   |
| C(1)-C(2)   | 1.402(2)   |
| C(2)-C(3)   | 1.380(2)   |
| C(3)-C(4)   | 1.386(2)   |
| C(3)-H(3)   | 0.9500     |
| C(4)-C(5)   | 1.391(2)   |
| C(4)-H(4)   | 0.9500     |
| C(5)-C(6)   | 1.411(2)   |
| C(5)-C(11)  | 1.488(2)   |
| C(6)-C(7)   | 1.513(2)   |
| C(7)-C(8)   | 1.533(2)   |
| C(7)-H(7A)  | 0.9900     |
| C(7)-H(7B)  | 0.9900     |
| C(8)-C(9)   | 1.537(2)   |
| C(8)-H(8A)  | 0.9900     |
| C(8)-H(8B)  | 0.9900     |
| C(9)-C(10)  | 1.505(2)   |
| C(9)-H(9A)  | 0.9900     |
| C(9)-H(9B)  | 0.9900     |
| C(10)-C(11) | 1.340(2)   |
| C(10)-H(10) | 0.9500     |
| C(11)-C(12) | 1.486(2)   |
| C(12)-C(17) | 1.392(2)   |
| C(12)-C(13) | 1.397(2)   |



|                  |            |
|------------------|------------|
| C(13)-C(14)      | 1.386(2)   |
| C(13)-H(13)      | 0.9500     |
| C(14)-C(15)      | 1.397(2)   |
| C(15)-C(16)      | 1.387(2)   |
| C(16)-C(17)      | 1.390(2)   |
| C(17)-H(17)      | 0.9500     |
| C(18)-H(18A)     | 0.9800     |
| C(18)-H(18B)     | 0.9800     |
| C(18)-H(18C)     | 0.9800     |
| C(19)-H(19A)     | 0.9800     |
| C(19)-H(19B)     | 0.9800     |
| C(19)-H(19C)     | 0.9800     |
| C(20)-H(20A)     | 0.9800     |
| C(20)-H(20B)     | 0.9800     |
| C(20)-H(20C)     | 0.9800     |
| C(21)-H(21A)     | 0.9800     |
| C(21)-H(21B)     | 0.9800     |
| C(21)-H(21C)     | 0.9800     |
|                  |            |
| C(1)-O(1)-H(1)   | 109.8(14)  |
| C(2)-O(2)-C(18)  | 116.75(13) |
| C(16)-O(3)-C(21) | 115.67(12) |
| C(15)-O(4)-C(20) | 113.70(12) |
| C(14)-O(5)-C(19) | 116.23(12) |
| O(1)-C(1)-C(6)   | 118.85(14) |
| O(1)-C(1)-C(2)   | 120.40(14) |
| C(6)-C(1)-C(2)   | 120.74(14) |
| O(2)-C(2)-C(3)   | 125.60(14) |
| O(2)-C(2)-C(1)   | 114.15(13) |
| C(3)-C(2)-C(1)   | 120.25(14) |
| C(2)-C(3)-C(4)   | 119.27(15) |
| C(2)-C(3)-H(3)   | 120.4      |
| C(4)-C(3)-H(3)   | 120.4      |
| C(3)-C(4)-C(5)   | 121.43(14) |
| C(3)-C(4)-H(4)   | 119.3      |
| C(5)-C(4)-H(4)   | 119.3      |

|                   |            |
|-------------------|------------|
| C(4)-C(5)-C(6)    | 119.37(14) |
| C(4)-C(5)-C(11)   | 121.10(14) |
| C(6)-C(5)-C(11)   | 119.52(14) |
| C(1)-C(6)-C(5)    | 118.93(14) |
| C(1)-C(6)-C(7)    | 120.82(14) |
| C(5)-C(6)-C(7)    | 120.20(14) |
| C(6)-C(7)-C(8)    | 114.16(13) |
| C(6)-C(7)-H(7A)   | 108.7      |
| C(8)-C(7)-H(7A)   | 108.7      |
| C(6)-C(7)-H(7B)   | 108.7      |
| C(8)-C(7)-H(7B)   | 108.7      |
| H(7A)-C(7)-H(7B)  | 107.6      |
| C(7)-C(8)-C(9)    | 111.76(13) |
| C(7)-C(8)-H(8A)   | 109.3      |
| C(9)-C(8)-H(8A)   | 109.3      |
| C(7)-C(8)-H(8B)   | 109.3      |
| C(9)-C(8)-H(8B)   | 109.3      |
| H(8A)-C(8)-H(8B)  | 107.9      |
| C(10)-C(9)-C(8)   | 112.85(14) |
| C(10)-C(9)-H(9A)  | 109.0      |
| C(8)-C(9)-H(9A)   | 109.0      |
| C(10)-C(9)-H(9B)  | 109.0      |
| C(8)-C(9)-H(9B)   | 109.0      |
| H(9A)-C(9)-H(9B)  | 107.8      |
| C(11)-C(10)-C(9)  | 122.58(15) |
| C(11)-C(10)-H(10) | 118.7      |
| C(9)-C(10)-H(10)  | 118.7      |
| C(10)-C(11)-C(12) | 121.24(14) |
| C(10)-C(11)-C(5)  | 120.60(14) |
| C(12)-C(11)-C(5)  | 118.06(13) |
| C(17)-C(12)-C(13) | 119.24(14) |
| C(17)-C(12)-C(11) | 119.96(14) |
| C(13)-C(12)-C(11) | 120.72(14) |
| C(14)-C(13)-C(12) | 120.16(14) |
| C(14)-C(13)-H(13) | 119.9      |
| C(12)-C(13)-H(13) | 119.9      |

|                     |            |
|---------------------|------------|
| O(5)-C(14)-C(13)    | 124.07(14) |
| O(5)-C(14)-C(15)    | 115.44(13) |
| C(13)-C(14)-C(15)   | 120.49(14) |
| O(4)-C(15)-C(16)    | 120.20(14) |
| O(4)-C(15)-C(14)    | 120.45(13) |
| C(16)-C(15)-C(14)   | 119.25(14) |
| O(3)-C(16)-C(15)    | 116.76(14) |
| O(3)-C(16)-C(17)    | 122.83(13) |
| C(15)-C(16)-C(17)   | 120.40(14) |
| C(16)-C(17)-C(12)   | 120.43(14) |
| C(16)-C(17)-H(17)   | 119.8      |
| C(12)-C(17)-H(17)   | 119.8      |
| O(2)-C(18)-H(18A)   | 109.5      |
| O(2)-C(18)-H(18B)   | 109.5      |
| H(18A)-C(18)-H(18B) | 109.5      |
| O(2)-C(18)-H(18C)   | 109.5      |
| H(18A)-C(18)-H(18C) | 109.5      |
| H(18B)-C(18)-H(18C) | 109.5      |
| O(5)-C(19)-H(19A)   | 109.5      |
| O(5)-C(19)-H(19B)   | 109.5      |
| H(19A)-C(19)-H(19B) | 109.5      |
| O(5)-C(19)-H(19C)   | 109.5      |
| H(19A)-C(19)-H(19C) | 109.5      |
| H(19B)-C(19)-H(19C) | 109.5      |
| O(4)-C(20)-H(20A)   | 109.5      |
| O(4)-C(20)-H(20B)   | 109.5      |
| H(20A)-C(20)-H(20B) | 109.5      |
| O(4)-C(20)-H(20C)   | 109.5      |
| H(20A)-C(20)-H(20C) | 109.5      |
| H(20B)-C(20)-H(20C) | 109.5      |
| O(3)-C(21)-H(21A)   | 109.5      |
| O(3)-C(21)-H(21B)   | 109.5      |
| H(21A)-C(21)-H(21B) | 109.5      |
| O(3)-C(21)-H(21C)   | 109.5      |
| H(21A)-C(21)-H(21C) | 109.5      |
| H(21B)-C(21)-H(21C) | 109.5      |

---

Symmetry transformations used to generate equivalent atoms:

Table S8. Anisotropic displacement parameters ( $\text{\AA}^2 \times 10^3$ ) for **39**. The anisotropic displacement factor exponent takes the form:  $-2\pi^2 [ h^2 a^{*2} U^{11} + \dots + 2 h k a^* b^* U^{12} ]$

|       | $U^{11}$ | $U^{22}$ | $U^{33}$ | $U^{23}$ | $U^{13}$ | $U^{12}$ |
|-------|----------|----------|----------|----------|----------|----------|
| O(1)  | 33(1)    | 26(1)    | 24(1)    | -3(1)    | -8(1)    | 8(1)     |
| O(2)  | 30(1)    | 24(1)    | 28(1)    | -4(1)    | -5(1)    | 10(1)    |
| O(3)  | 19(1)    | 20(1)    | 27(1)    | 3(1)     | -1(1)    | -1(1)    |
| O(4)  | 17(1)    | 26(1)    | 29(1)    | -2(1)    | -4(1)    | -2(1)    |
| O(5)  | 20(1)    | 29(1)    | 22(1)    | 6(1)     | -3(1)    | -2(1)    |
| C(1)  | 18(1)    | 26(1)    | 19(1)    | -1(1)    | 1(1)     | 0(1)     |
| C(2)  | 17(1)    | 24(1)    | 22(1)    | 3(1)     | 3(1)     | 3(1)     |
| C(3)  | 21(1)    | 21(1)    | 24(1)    | -3(1)    | 4(1)     | 1(1)     |
| C(4)  | 19(1)    | 28(1)    | 20(1)    | -1(1)    | 0(1)     | -2(1)    |
| C(5)  | 14(1)    | 24(1)    | 21(1)    | 2(1)     | 3(1)     | 0(1)     |
| C(6)  | 17(1)    | 22(1)    | 21(1)    | 1(1)     | 4(1)     | 0(1)     |
| C(7)  | 22(1)    | 25(1)    | 25(1)    | -3(1)    | -2(1)    | 5(1)     |
| C(8)  | 25(1)    | 25(1)    | 36(1)    | -2(1)    | -7(1)    | 0(1)     |
| C(9)  | 23(1)    | 26(1)    | 35(1)    | 6(1)     | -5(1)    | -4(1)    |
| C(10) | 19(1)    | 26(1)    | 28(1)    | 4(1)     | -3(1)    | 0(1)     |
| C(11) | 16(1)    | 25(1)    | 21(1)    | 1(1)     | 1(1)     | 1(1)     |
| C(12) | 18(1)    | 23(1)    | 21(1)    | -3(1)    | 2(1)     | 2(1)     |
| C(13) | 19(1)    | 22(1)    | 21(1)    | 0(1)     | 3(1)     | -1(1)    |
| C(14) | 20(1)    | 22(1)    | 17(1)    | -2(1)    | 0(1)     | 3(1)     |
| C(15) | 15(1)    | 23(1)    | 22(1)    | -5(1)    | -2(1)    | -1(1)    |
| C(16) | 21(1)    | 18(1)    | 19(1)    | -3(1)    | 4(1)     | -1(1)    |
| C(17) | 19(1)    | 21(1)    | 21(1)    | -1(1)    | -1(1)    | 4(1)     |
| C(18) | 46(1)    | 29(1)    | 37(1)    | -8(1)    | -6(1)    | 17(1)    |
| C(19) | 26(1)    | 25(1)    | 24(1)    | 5(1)     | -3(1)    | -3(1)    |
| C(20) | 17(1)    | 32(1)    | 37(1)    | 3(1)     | -3(1)    | 1(1)     |
| C(21) | 25(1)    | 21(1)    | 27(1)    | 1(1)     | -1(1)    | 2(1)     |

Table S9. Hydrogen bonds for **39** [Å and °].

| D-H...A            | d(D-H)  | d(H...A) | d(D...A)   | <(DHA)    |
|--------------------|---------|----------|------------|-----------|
| O(1)-H(1)...O(3)#1 | 0.89(2) | 2.03(2)  | 2.8229(16) | 148(2)    |
| O(1)-H(1)...O(2)   | 0.89(2) | 2.20(2)  | 2.6589(16) | 111.5(17) |

Symmetry transformations used to generate equivalent atoms:

#1  $x+1/2, y, -z+1/2$

S2. Crystallographic data for structure **39** (deposition number CCDC

941978) reported in this paper have been deposited with the Cambridge Crystallographic Data Centre. Copies of the data can be obtained, free of charge, on application to the Director, CCDC,

12 Union Road, Cambridge CB2 1EZ, UK (fax: +44-(0) 1223-336033 or e-mail:

[deposit@ccdc.cam.ac.uk](mailto:deposit@ccdc.cam.ac.uk)).

### **Mechanistic Speculation Regarding Selective Demethylation with Ionic Liquid**

In the case of the selective demethylation of *ortho*-dimethoxybenzosuberone **18** resulting in the 1-hydroxy-2-methoxy derivative **21**, the argument can be advanced that the methoxy group located *para* to the carbonyl group is partially stabilized by a charge separated resonance contributor rendering the oxygen atom of that methoxy group somewhat less nucleophilic for coordination with the ionic liquid, which most likely precedes the chloride attack to liberate chloromethane. Related dimethoxytetralone and dimethoxyindanone systems that undergo selective demethylation with this same ionic liquid are described by Kemperman and co-workers.<sup>S3</sup> Interestingly, with the trimethoxybenzosuberone analogue **16**, it is the methoxy group *para* to the fused-ring carbonyl moiety that is selectively cleaved, however in this case it is likely that the two *ortho*-flanking methoxy groups aid in the coordination of the chloroaluminate anion to the central methoxy group, facilitating selective demethylation at that position.

## Scheme And Experimentals for Precursor Steps of Compound 2

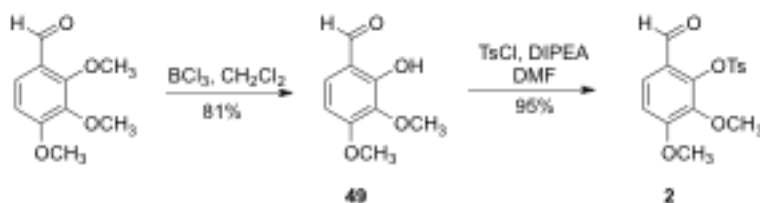

Scheme S1. Precursor steps to compound 2

*2-Hydroxy-3,4-dimethoxybenzaldehyde (49)*.<sup>S4,S5</sup> 2,3,4-Trimethoxybenzaldehyde (5.00 g, 25.5 mmol) was dissolved in dry  $\text{CH}_2\text{Cl}_2$  (15 mL) at 0 °C under nitrogen. Anhydrous  $\text{BCl}_3$  (28.0 mL, 1.0 M soln in  $\text{CH}_2\text{Cl}_2$ ) was added dropwise, and the reaction mixture stirred for 5 h. The reaction was quenched with  $\text{H}_2\text{O}$  (10 mL), and the aqueous phase was extracted with  $\text{CH}_2\text{Cl}_2$  ( $2 \times 25$  mL). The organic extract was washed with brine, dried over  $\text{Na}_2\text{SO}_4$ , and concentrated under reduced pressure. The crude product was subjected to flash column chromatography (silica gel, 30:70 EtOAc-hexanes) to yield aldehyde **49** (3.75 g, 20.6 mmol, 81% yield) as a white powder.

$^1\text{H NMR}$  ( $\text{CDCl}_3$ , 500 MHz)  $\delta$  11.2 (1H, s, *OH*-2), 9.75 (1H, s, *CHO*-1a), 7.29 (1H, d,  $J = 9.0$  Hz, H-6), 6.61 (1H, d,  $J = 9.0$  Hz, H-5), 3.95 (3H, s,  $\text{OCH}_3$ -4), 3.91 (3H, s,  $\text{OCH}_3$ -3).  $^{13}\text{C NMR}$  ( $\text{CDCl}_3$ , 126 MHz)  $\delta$  194.9 (CH, C-1a), 159.4 (C, C-4), 155.7 (C, C-2), 136.2 (C, C-3), 130.2 (CH, C-6), 116.6 (C, C-1), 104.0 (CH, C-5), 60.8 ( $\text{CH}_3$ ,  $\text{OCH}_3$ -3), 56.3 ( $\text{CH}_3$ ,  $\text{OCH}_3$ -4).

*2-Tosyloxy-3,4-dimethoxybenzaldehyde (2)*.<sup>S5</sup> To a stirred solution of aldehyde **49** (2.0 g, 11.0 mmol),  $\text{DIPEA}$  (4.0 mL, 23.0 mmol) in anhydrous  $\text{DMF}$  (10 mL) at rt, *p*- $\text{TsCl}$  (4.18 g, 22.0 mmol) was added in portions. The reaction mixture was stirred 12 h and quenched with  $\text{H}_2\text{O}$  (10 mL). The solution was extracted with  $\text{CH}_2\text{Cl}_2$  ( $3 \times 25$  mL). The combined organic phases were washed with brine, dried over  $\text{MgSO}_4$ , filtered, and evaporated



under reduced pressure. The crude product was subjected to flash column chromatography (silica gel, 10:90 EtOAc-hexanes) to afford aldehyde **2** (3.50 g, 10.4 mmol, 95% yield) as a white solid. <sup>1</sup>H NMR (CDCl<sub>3</sub>, 500 MHz) δ 9.86 (1H, s, CHO-1a), 7.86 (2H, d, *J* = 8.35 Hz, H-2', -6'), 7.68 (1H, d, *J* = 8.8 Hz, H-6), 7.37 (2H, d, *J* = 8.35 Hz, H-3', -5'), 6.94 (1H, d, *J* = 8.8 Hz, H-5), 3.94 (3H, s, OCH<sub>3</sub>-4), 3.74 (3H, s, OCH<sub>3</sub>-3), 2.48 (3H, s, CH<sub>3</sub>-4'). <sup>13</sup>C NMR (CDCl<sub>3</sub>, 126 MHz) δ 187.0 (CH, C-1a), 158.9 (C, C-4), 145.8 (C, C-2), 145.1 (C, C-3), 142.3 (C, C-3), 132.8 (C, C-1'), 129.9 (CH, C-3', -5'), 128.4 (C, C-2', -6'), 124.0 (C, C-1), 123.9 (CH, C-6), 110.6 (CH, C-5), 61.0 (CH<sub>3</sub>, OCH<sub>3</sub>-3), 56.4 (CH<sub>3</sub>, OCH<sub>3</sub>-4), 21.8 (CH<sub>3</sub>, CH<sub>3</sub>-4').

## Scheme and Experimentals for Alternative Route to Compound 39

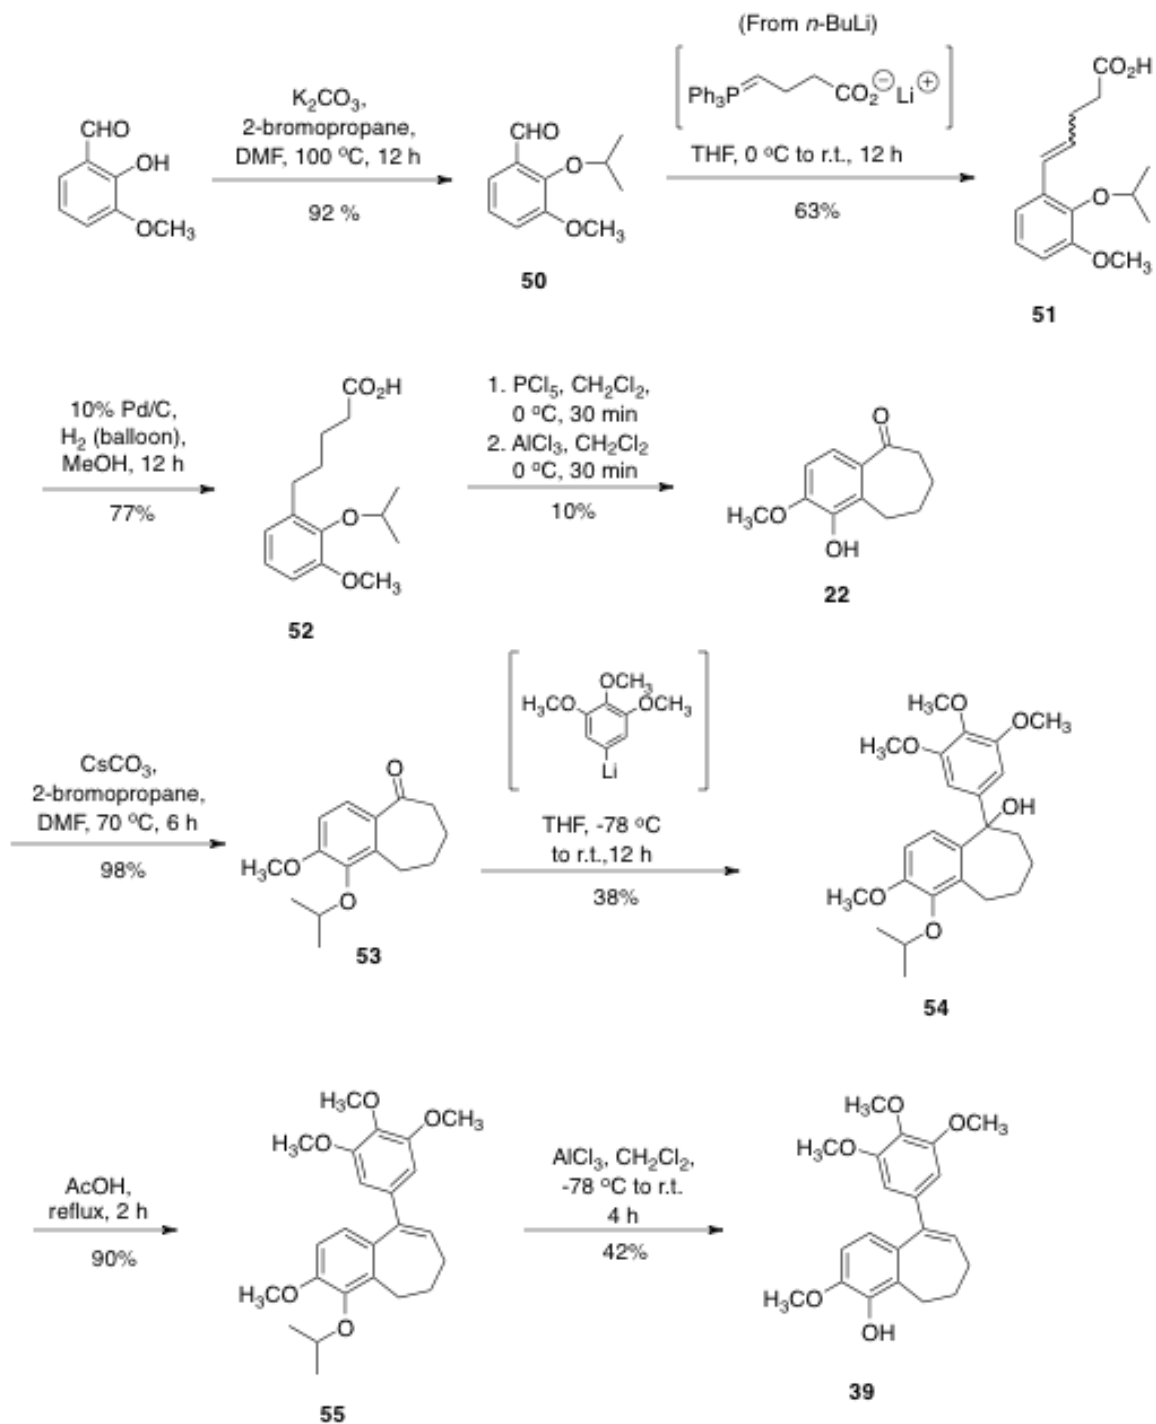

Scheme S2. Alternative synthetic route to compound 39

*2-Isopropoxy-3-methoxybenzaldehyde (50)*.<sup>S6</sup> Commercially available *o*-vanillin (10.2 g, 60.7 mmol) was dissolved in DMF (50 mL). To this solution was added 2-bromopropane (20.0 g, 162.4 mmol) and K<sub>2</sub>CO<sub>3</sub> (28.0 g, 203.0 mmol). The reaction mixture was heated to 100 °C and stirred for 12 h. The reaction was quenched with H<sub>2</sub>O (50 mL) and was then extracted with EtOAc (4 x 50 mL). The combined organic extracts were washed with brine, dried over Na<sub>2</sub>SO<sub>4</sub>, filtered, evaporated under reduced pressure, and purified using flash chromatography with a pre-packed 100 g silica column [solvent A: EtOAc, solvent B: hexanes; gradient, 5%A / 95%B (1 CV), 5%A / 95%B → 29%A / 71%B (7 CV); flow rate, 40 mL/min; monitored at 254 and 280 nm]. The isopropyl protected *o*-vanillin **50** (10.8 g, 55.8 mmol, 92% yield) was obtained as a yellow oil. <sup>1</sup>H NMR (CDCl<sub>3</sub>, 500 MHz): δ 10.44 (1 H, d, *J* = 0.7 Hz), 7.40 (1 H, dd, *J* = 7.5, 1.9 Hz), 7.11 (1 H, dd, *J* = 8.0, 1.8 Hz), 7.08 (1 H, td, *J* = 7.8, 0.8 Hz), 4.62 (1 H, p, *J* = 6.2 Hz), 3.86 (3 H, s), 1.30 (6 H, d, *J* = 6.2).

*5-(2-Isopropoxy-3-methoxyphenyl)pent-4-enoic acid (51)*. (3-Carboxypropyl)triphenylphosponium bromide (9.10 g, 21.2 mmol) was dissolved in THF (50 mL) and cooled to 0 °C. *n*-BuLi (24.0 mL, 1.75 M in hexanes) was added to the solution and stirred for 1 h, warmed to ambient temperature and stirred for 15 min, then cooled to 0 °C. Isopropyl protected *o*-vanillin intermediate **50** (2.02 g, 10.4 mmol) was dissolved in THF (5 mL) and was then added to the phosphine ylide solution. The solution was allowed to warm to ambient temperature while stirring for 12 h. The reaction was quenched with aqueous 2M HCl (30 mL) and extracted with EtOAc (4 x 25 mL). The combined organic extracts were washed with brine, dried over Na<sub>2</sub>SO<sub>4</sub>, filtered, evaporated under reduced pressure, and purified using flash chromatography

with a pre-packed 100 g silica column [solvent A: EtOAc, solvent B: hexanes; gradient: 5%A / 95%B (1 CV), 5%A / 95%B → 52% A / 48%B (7 CV); flow rate, 12 mL/min; monitored at 254 and 280 nm]. The combined *E* and *Z* isomers of alkene analogue **51** (1.72 g, 6.51 mmol, 63% yield) was obtained as a yellow oil.

*5-(2-Isopropoxy-3-methoxyphenyl)pentanoic acid (52)*. 5-(2-isopropoxy-3-methoxyphenyl)pent-4-enoic acid intermediate **51** (7.49 g, 28.3 mmol) was dissolved in MeOH (100 mL). 10% Pd/C (1.3 g) was added to the solution and stirred for 10 min at ambient temperature. Hydrogen balloons were then added to the sealed system and allowed to stir for 12 h. The solution was filtered through CELITE and washed with EtOAc (4 x 25 mL). The combined organic extracts were evaporated under reduced pressure, and purified using flash chromatography with a pre-packed 100 g silica column [solvent A: EtOAc, solvent B: hexanes; gradient: 12%A / 88%B (1 CV), 12%A / 88%B → 100%A / 0%B (15 CV); flow rate, 40 mL/min; monitored at 254 and 280 nm]. The carboxylic acid analogue **52** (5.78 g, 21.7 mmol, 77% yield) was obtained as a clear oil. <sup>1</sup>H NMR (CDCl<sub>3</sub>, 500 MHz): δ 6.95 (1 H, t, *J* = 7.9 Hz), 6.75 (2 H, m), 4.46 (1 H, p, *J* = 6.2 Hz), 2.66 (2 H, t, *J* = 7.3 Hz), 2.38 (2 H, t, *J* = 7.2 Hz), 1.66 (4 H, m), 1.28 (d, *J* = 6.2 Hz).

*1-Hydroxy-2-methoxybenzuber-5-one (22)*.<sup>S5</sup> 5-(2-isopropoxy-3-methoxyphenyl)pentanoic acid **52** (4.68 g, 17.6 mmol) was dissolved in CH<sub>2</sub>Cl<sub>2</sub> (250 mL) and cooled to 0 °C. Phosphorous pentachloride (5.03 g, 24.1 mmol) was added to the solution and stirred for 30 min at 0 °C. The excess phosphorous pentachloride and CH<sub>2</sub>Cl<sub>2</sub> was removed under reduced pressure. Aluminum chloride was diluted in CH<sub>2</sub>Cl<sub>2</sub> (250 mL) and cooled to 0 °C added. The crude acyl chloride intermediate was then

dissolved in CH<sub>2</sub>Cl<sub>2</sub> (10 mL), added to the aluminum chloride solution, and stirred for 30 min at 0 °C. The reaction was quenched with H<sub>2</sub>O (30 mL) and extracted with CH<sub>2</sub>Cl<sub>2</sub> (4 x 50 mL). The combined organic extracts were washed with brine, dried over Na<sub>2</sub>SO<sub>4</sub>, filtered, evaporated under reduced pressure, and purified by flash chromatography using 10% EtOAc/90% hexanes as eluent. The ketone analogue **22** (0.355 g, 1.72 mmol, 10% yield) was obtained as a white solid. <sup>1</sup>H NMR (CDCl<sub>3</sub>, 500 MHz): δ 7.34 (1 H, d, *J* = 8.5 Hz), 6.79 (1 H, d, *J* = 8.5 Hz), 5.79 (1 H, s), 3.94 (3 H, s), 3.02 (2 H, m), 2.71 (2 H, m), 1.82 (4 H, m). <sup>13</sup>C NMR (CDCl<sub>3</sub>, 125 MHz): δ 205.2, 149.4, 142.6, 133.4, 127.8, 121.0, 108.0, 56.2, 40.9, 24.6, 23.2, 21.5.

*1-Isopropoxy-2-methoxybenzosuber-5-one (53)*.<sup>S8</sup> 1-Hydroxy-2-methoxybenzosuber-5-one analogue **22** (0.261 g, 1.27 mmol) was dissolved in DMF (10 mL). To this solution was added 2-bromopropane (0.196 g, 1.60 mmol) and Cs<sub>2</sub>CO<sub>3</sub> (1.45 g, 4.44 mmol). The reaction mixture was heated to 100 °C and stirred for 6 h. The reaction was quenched with H<sub>2</sub>O (20 mL) and extracted with EtOAc (4 x 25 mL). The combined organic extracts were washed with brine, dried over Na<sub>2</sub>SO<sub>4</sub>, filtered, evaporated under reduced pressure, and purified using flash chromatography with a pre-packed 25 g silica column [solvent A: EtOAc, solvent B: hexanes; gradient: 5%A / 95%B → 7%A / 93%B (1 CV), 7%A / 93%B → 60%A / 40%B (12 CV); flow rate, 25 mL/min; monitored at 254 and 280 nm]. The isopropyl protected benzosuberone analogue **53** (0.308 g, 1.24 mmol, 98% yield) was obtained as a yellow oil. <sup>1</sup>H NMR (CDCl<sub>3</sub>, 500 MHz): δ 7.51 (1 H, d, *J* = 8.6 Hz), 6.82 (1 H, d, *J* = 8.6 Hz), 4.41 (1 H, p, *J* = 6.1 Hz), 3.88 (3 H, s), 3.03 (2 H, m), 2.70 (2 H, m), 1.80 (4 H, m), 1.29 (6 H, d, *J* = 6.2 Hz).

*1-Isopropoxy-2-methoxy-5-(3',4',5'-trimethoxyphenyl)-6,7,8,9-tetrahydro-5H-benzo[7]annulen-5-ol (54)*.<sup>S8</sup> 3,4,5-Trimethoxybromobenzene (0.113 g, 0.457 mmol) was dissolved in THF (5 mL) and cooled to -78 °C. To this solution was added *n*-BuLi (0.20 mL, 2.3 M in hexanes) and the solution was allowed to stir for 1 h. 1-Isopropoxy-2-methoxybenzuber-5-one analogue **53** (0.079 g, 0.320 mmol) was dissolved in THF (2 mL) and was added to the aryl lithium solution. The reaction was allowed to warm to ambient temperature over 12 h and was quenched with H<sub>2</sub>O (5 mL). The organic solvent was removed under reduced pressure. The aqueous mixture was extracted with EtOAc (4 x 10 mL). The combined organic extracts were washed with brine, dried over Na<sub>2</sub>SO<sub>4</sub>, filtered, evaporated under reduced pressure, and purified using flash chromatography with a pre-packed 25 g silica column [solvent A: EtOAc, solvent B: hexanes; gradient, 7%A / 93%B (1 CV), 7%A / 93%B → 60%A / 40%B (10 CV), 60%A / 40%B (2 CV); flow rate, 25 mL/min; monitored at 254 and 280 nm]. The tertiary alcohol analogue **54** (0.051g, 0.123 mmol, 38% yield) was obtained as a yellow oil.

*4-Isopropoxy-3-methoxy-9-(3',4',5'-trimethoxyphenyl)-6,7-dihydro-5H-benzo[7]annulene (55)*.<sup>S8</sup> Tertiary alcohol intermediate **54** (0.048 g, 0.115 mmol) was dissolved in AcOH (8 mL) and refluxed for 6 h. The reaction was quenched with H<sub>2</sub>O and extracted with Et<sub>2</sub>O (4 x 10 mL). The combined organic extracts were washed with brine, dried over Na<sub>2</sub>SO<sub>4</sub>, filtered, evaporated under reduced pressure, and purified using flash chromatography with a pre-packed 10 g silica column [solvent A: EtOAc, solvent B: hexanes; gradient: 7%A / 93%B (4 CV), 7%A / 93%B → 60%A / 40%B (19 CV); flow rate, 25 mL/min; monitored at 254 and 280 nm]. Alkene analogue **55** (0.041 g, 0.104 mmol, 90% yield) was obtained as a yellow oil. <sup>1</sup>H NMR (CDCl<sub>3</sub>, 500 MHz): δ 6.73 (2 H, s), 6.47 (2 H, s),

6.33 (1 H, t,  $J = 7.2$  Hz), 4.51 (1 H, p,  $J = 6.1$  Hz), 3.86 (3 H, s), 3.85 (3 H, s), 3.80 (6 H, s), 2.78 (2 H, t,  $J = 6.9$  Hz), 2.14 (2 H, p,  $J = 6.9$  Hz), 1.96 (2 H, q,  $J = 7.0$  Hz), 1.34 (6 H, d,  $J = 6.1$  Hz).

*3-Methoxy-9-(3',4',5'-trimethoxyphenyl)-6,7-dihydro-5H-benzo[7]annulen-4-ol* )

**(39)**.<sup>S5,S8,S9</sup> Aluminum chloride (0.057 g, 0.427 mmol) was dissolved in CH<sub>2</sub>Cl<sub>2</sub> (2 mL) and cooled to 0 °C. Alkene intermediate **55** (0.041 g, 0.099 mmol) was dissolved in CH<sub>2</sub>Cl<sub>2</sub> (2 mL) and added to aluminum chloride solution. The solution was allowed to stir for 30 min at 0 °C. The reaction was quenched with H<sub>2</sub>O and extracted with CH<sub>2</sub>Cl<sub>2</sub> (4 x 10 mL). The combined organic extracts were washed with brine, dried over Na<sub>2</sub>SO<sub>4</sub>, filtered, evaporated under reduced pressure, and purified using flash chromatography with a pre-packed 10 g silica column [solvent A: EtOAc, solvent B: hexanes; gradient: 7%A / 93%B (1 CV), 7%A / 93%B → 60%A / 40%B (13 CV), 60%A / 40%B (2 CV); flow rate, 40 mL/min; monitored at 254 and 280 nm]. Alkene analogue **39** (0.015 g, 0.042 mmol, 42% yield) was obtained as a white solid. <sup>1</sup>H NMR (CDCl<sub>3</sub>, 500 MHz):  $\delta$  6.71 (1 H, d,  $J = 8.4$  Hz), 6.57 (1 H, d,  $J = 8.4$  Hz), 6.50 (2 H, s), 6.34 (1 H, t,  $J = 7.4$  Hz), 5.73 (1 H, s), 3.91 (3 H, s), 3.86 (3 H, s), 3.80 (6 H, s), 2.76 (2 H, t,  $J = 6.9$  Hz), 2.14 (2 H, p,  $J = 7.1$  Hz), 1.96 (2 H, q, 7.1 Hz). <sup>13</sup>C NMR (CDCl<sub>3</sub>, 125 MHz):  $\delta$  153.0, 145.2, 142.9, 142.5, 138.6, 137.4, 134.4, 127.9, 127.4, 121.0, 107.8, 105.4, 61.1, 56.3, 56.1, 33.8, 25.9, 23.7.

**HRMS**,  $m/z$ : observed 357.1699 [M + H]<sup>+</sup>, calcd for C<sub>21</sub>H<sub>25</sub>O<sub>5</sub><sup>+</sup>, 357.1697.

| Compound Number             | Compound                                                                           | cLogP               |
|-----------------------------|------------------------------------------------------------------------------------|---------------------|
| 39                          | 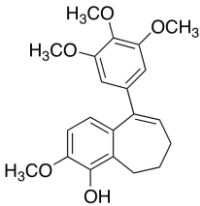  | 3.95 ± 0.55 (3.93)  |
| 44 – Calculated without Na+ |   | 2.42 ± 1.57* (2.28) |
| 45                          |   | 3.73 ± 0.47 (3.51)  |
| 48 – Calculated without Cl- |  | 0.88 ± 1.81 (1.98)  |

<http://www.vcclab.org/lab/alogps/> is the online application used to calculate the first log P given. This number is an average of eight algorithms calculating log P. The number in parenthesis is the log P generated by chemdraw. Numbers with asterisks had one unreliable log P calculations. Citations for the online application:

1. Tetko, I. V.; Gasteiger, J.; Todeschini, R.; Mauri, A.; Livingstone, D.; Ertl, P.; Palyulin, V. A.; Radchenko, E. V.; Zefirov, N. S.; Makarenko, A. S.; Tanchuk, V. Y.; Prokopenko, V. V. *Virtual computational chemistry laboratory - design and description*, *J. Comput. Aid. Mol. Des.*, **2005**, 19, 453-63.
2. VCCLAB, Virtual Computational Chemistry Laboratory, <http://www.vcclab.org>, 2005.

cLog P: a distribution coefficient that describes how well a compound will partition itself between octanol and water (thus describing its lipophilicity). This partition coefficient describes the “druglikeness,” and is thought that if the cLogP is less than 5, the compound is a good candidate as a drug because hydrophobic compounds are more likely to distribute to lipid bilayers of cells.



## Supplementary References and Notes

- S1. Crystallographic data for structure **38** (deposition number CCDC 953837) reported in this paper have been deposited with the Cambridge Crystallographic Data Centre. Copies of the data can be obtained, free of charge, on application to the Director, CCDC, 12 Union Road, Cambridge CB2 1EZ, UK (fax: +44-(0) 1223-336033 or e-mail: [deposit@ccdc.cam.ac.uk](mailto:deposit@ccdc.cam.ac.uk)).
- S2. Crystallographic data for structure **39** (deposition number CCDC 941978) reported in this paper have been deposited with the Cambridge Crystallographic Data Centre. Copies of the data can be obtained, free of charge, on application to the Director, CCDC, 12 Union Road, Cambridge CB2 1EZ, UK (fax: +44-(0) 1223-336033 or e-mail: [deposit@ccdc.cam.ac.uk](mailto:deposit@ccdc.cam.ac.uk)).
- S3. Kemperman, G.; Roeters, T.; Hilberink, P. *Eur. J. Org. Chem.* **2003**, 1681-1686.
- S4. Baker, W.; Smith, H.A. *J. Chem. Soc.* **1931**, 2542-2549.
- S5. Pinney, K.G.; Sriram, M.; George, C.; Tanpure, R.P. Efficient method for preparing functionalized benzosuberenes useful as cytotoxic agents. *PCT Int. Appl.* **2012**, WO 2012068284 A2 20120524.
- S6. Delaby, R.; Tsatsa, G.; Jehdrot, M.C. *Bulleting de la Societe Chimique de France*, **1956**, 1830-1833.
- S7. Horton, W.J.; Pitchforth, L.L. *J. Org. Chem.* **1960**, *25*, 131-132.
- S8. Sriram, M.; Hall, J.J.; Grohman, N.C.; Strecker, T.E.; Wootton, T.; Franken, A.; Trawick, M.L.; Pinney, K.G. *Bioorg. Med. Chem.* **2008**, *16*, 8161-8171.
- S9. Chen, Z.; O'Donnell, C.J.; Maderna, A. *Tetrahedron Letters*, **2012**, *53*, 64-66.
